# Supplementary material for: CDCP1 knockdown suppresses PDGFRβ/AKT pathway-mediated vascular smooth muscle cell proliferation by inhibiting PDGFRβ endocytosis
Source: PeerJ. 2025 Apr 15;13:e19114. doi: 10.7717/peerj.19114 (PMC12007496; doi:10.7717/peerj.19114)
Supplement: Data S1 — Raw data of siCDCP1 and siNC differentially expressed gene annotation. [file peerj-13-19114-s001.xls]

## Sheet: peerj-102496-Sequence_data
gene_id	si_CDCP1_1	si_CDCP1_2	si_CDCP1_3	si_NC_1	si_NC_2	si_NC_3	si_CDCP1	si_NC	log2FoldChange	pvalue	padj	gene_name	gene_chr	gene_start	gene_end	gene_strand	gene_length	gene_biotype	gene_description	Family
ENSMUSG00000083563	526.25	567.372	627.823	944.606	1029.14	897.199	573.815	956.981	-0.738305	2.64472e-14	1.37817e-10	Gm13340	2	22588103	22589647	-	1545	unprocessed_pseudogene	predicted gene 13340 [Source:MGI Symbol;Acc:MGI:3650227] && sp|P00397|COX1_MOUSE Cytochrome c oxidase subunit 1 OS=Mus musculus OX=10090 GN=Mtco1 PE=1 SV=2 && -	-
ENSMUSG00000072940	110.007	187.37	218.803	310.029	339.889	384.788	172.06	344.902	-1.00591	2.5305e-12	8.79095e-09	Gm10443	6	86334031	86334240	+	210	processed_pseudogene	predicted pseudogene 10443 [Source:MGI Symbol;Acc:MGI:3704272] && sp|Q56JX6|RS28_BOVIN 40S ribosomal protein S28 OS=Bos taurus OX=9913 GN=RPS28 PE=3 SV=1 && -	-
ENSMUSG00000081453	183.345	154.738	213.306	293.801	314.634	308.022	183.796	305.486	-0.733382	5.09083e-11	1.28322e-07	Gm6767	16	51362452	51363832	-	1381	processed_pseudogene	predicted gene 6767 [Source:MGI Symbol;Acc:MGI:3645053] && sp|P68103|EF1A1_BOVIN Elongation factor 1-alpha 1 OS=Bos taurus OX=9913 GN=EEF1A1 PE=1 SV=1 && -	-
ENSMUSG00000082536	159.56	181.054	131.942	299.78	271.491	246.61	157.518	272.627	-0.79129	6.15629e-11	1.28322e-07	Gm13456	2	40555752	40557116	+	1365	processed_pseudogene	predicted gene 13456 [Source:MGI Symbol;Acc:MGI:3651389] && sp|P62629|EF1A1_CRIGR Elongation factor 1-alpha 1 OS=Cricetulus griseus OX=10029 GN=EEF1A1 PE=2 SV=1 && PF00009:Elongation factor Tu GTP binding domain|PF03144:Elongation factor Tu domain 2	-
ENSMUSG00000078427	356.78	537.898	239.694	228.892	215.719	181.359	378.124	208.657	0.857768	7.7715e-10	1.34991e-06	Sarnp	10	128817333	128877629	+	1360	protein_coding	SAP domain containing ribonucleoprotein [Source:MGI Symbol;Acc:MGI:1913368] && sp|Q498U4|SARNP_RAT SAP domain-containing ribonucleoprotein OS=Rattus norvegicus OX=10116 GN=Sarnp PE=1 SV=3 && PF02037:SAP domain	-
ENSMUSG00000031004	311.191	269.475	192.415	378.355	412.497	386.707	257.694	392.52	-0.604245	1.1084e-09	1.65024e-06	Mki67	7	135689784	135716361	-	10061	protein_coding	antigen identified by monoclonal antibody Ki 67 [Source:MGI Symbol;Acc:MGI:106035] && sp|E9PVX6|KI67_MOUSE Proliferation marker protein Ki-67 OS=Mus musculus OX=10090 GN=Mki67 PE=1 SV=1 && PF08065:KI67R (NUC007) repeat|PF15276:Protein phosphatase 1 binding|PF00498:FHA domain	-
ENSMUSG00000067608	67.3918	52.6319	86.8617	91.3859	237.817	129.542	68.9618	152.915	-1.14566	3.28355e-07	0.000342212	Pcna-ps2	19	9283238	9284494	+	1257	protein_coding	proliferating cell nuclear antigen pseudogene 2 [Source:MGI Symbol;Acc:MGI:97505] && sp|P17918|PCNA_MOUSE Proliferating cell nuclear antigen OS=Mus musculus OX=10090 GN=Pcna PE=1 SV=2 && PF02747:Proliferating cell nuclear antigen, C-terminal domain|PF00705:Proliferating cell nuclear antigen, N-terminal domain	-
ENSMUSG00000080006	6.38949	4.02812	4.17257	17.7703	18.3464	15.4446	4.86339	17.1871	-1.82718	8.02564e-07	0.000729903	Rps19-ps7	2	140073032	140073469	-	438	processed_pseudogene	ribosomal protein S19, pseudogene 7 [Source:MGI Symbol;Acc:MGI:3652235] && sp|Q9CZX8|RS19_MOUSE 40S ribosomal protein S19 OS=Mus musculus OX=10090 GN=Rps19 PE=1 SV=3 && PF01090:Ribosomal protein S19e	-
ENSMUSG00000112449	96.9073	17.1195	108.487	225.09	108.244	668.532	74.1712	333.955	-2.17053	8.40418e-07	0.000729903	Srp54b	12	55155104	55189573	+	4513	protein_coding	signal recognition particle 54B [Source:MGI Symbol;Acc:MGI:3714357] && sp|P14576|SRP54_MOUSE Signal recognition particle 54 kDa protein OS=Mus musculus OX=10090 GN=Srp54 PE=1 SV=2 && -	-
ENSMUSG00000098222	2.12983	5.03515	1.04314	15.2316	17.4291	9.92869	2.73604	14.1965	-2.37174	1.02561e-06	0.000822222	Gm8318	15	18163881	18164752	+	872	processed_pseudogene	predicted gene 8318 [Source:MGI Symbol;Acc:MGI:3646694] && sp|P04797|G3P_RAT Glyceraldehyde-3-phosphate dehydrogenase OS=Rattus norvegicus OX=10116 GN=Gapdh PE=1 SV=3 && PF02800:Glyceraldehyde 3-phosphate dehydrogenase, C-terminal domain	-
ENSMUSG00000057990	9.58424	4.02812	5.21572	19.4627	22.0157	19.8574	6.27602	20.4452	-1.70962	8.6817e-06	0.0037671	E030024N20Rik	19	16164312	16164805	-	494	processed_pseudogene	RIKEN cDNA E030024N20 gene [Source:MGI Symbol;Acc:MGI:2442009] && sp|P14851|PPIA_CRIGR Peptidyl-prolyl cis-trans isomerase A OS=Cricetulus griseus OX=10029 GN=PPIA PE=2 SV=2 && -	-
ENSMUSG00000114688	22.3632	19.1336	16.6903	54.157	55.9565	28.6829	19.3957	46.2655	-1.26095	9.03642e-06	0.0037671	Gm47381	13	91259376	91274954	+	949	lincRNA	predicted gene, 47381 [Source:MGI Symbol;Acc:MGI:6096300] && sp|P26452|RSSA_BOVIN 40S ribosomal protein SA OS=Bos taurus OX=9913 GN=RPSA PE=2 SV=4 && -	-
ENSMUSG00000060019	308.825	327.285	264.958	421.409	465.081	420.315	300.356	435.602	-0.536354	1.19257e-05	0.00463922	Gm10073	8	106572966	106573461	-	496	protein_coding	predicted pseudogene 10073 [Source:MGI Symbol;Acc:MGI:3641908] && sp|P47955|RLA1_MOUSE 60S acidic ribosomal protein P1 OS=Mus musculus OX=10090 GN=Rplp1 PE=1 SV=1 && PF00428:60s Acidic ribosomal protein	-
ENSMUSG00000082064	13.8439	11.0773	5.21572	35.5405	30.2716	20.9606	10.0456	28.9242	-1.53201	1.20187e-05	0.00463922	Rpl5-ps2	2	154703809	154704699	+	891	processed_pseudogene	ribisomal protein L5, pseudogene 2 [Source:MGI Symbol;Acc:MGI:3649355] && sp|P47962|RL5_MOUSE 60S ribosomal protein L5 OS=Mus musculus OX=10090 GN=Rpl5 PE=1 SV=3 && PF17144:Ribosomal large subunit proteins 60S L5, and 50S L18|PF14204:Ribosomal L18 C-terminal region	-
ENSMUSG00000107468	0	1.05264	1.09951	5.97852	7.36602	5.75743	0.717384	6.36732	-3.17654	1.32916e-05	0.00480283	5730507A11Rik	2	38862163	38865533	+	3371	TEC	RIKEN cDNA 5730507A11 gene [Source:MGI Symbol;Acc:MGI:1917874] && - && -	-
ENSMUSG00000034493	0	0	0	5.92342	3.66928	4.41275	0	4.66848	-4.61391	1.33642e-05	0.00480283	4930556J24Rik	11	3937541	3976778	-	1220	protein_coding	RIKEN cDNA 4930556J24 gene [Source:MGI Symbol;Acc:MGI:1922592] && sp|Q9EQ61|PESC_MOUSE Pescadillo homolog OS=Mus musculus OX=10090 GN=Pes1 PE=1 SV=1 && -	-
ENSMUSG00000104418	2.12983	2.01406	3.12943	11.0006	13.7598	8.82551	2.42444	11.1953	-2.21259	1.46591e-05	0.00509086	Gm37070	1	179924952	179925411	-	460	processed_pseudogene	predicted gene, 37070 [Source:MGI Symbol;Acc:MGI:5610298] && sp|A5JSS2|RL21_CAPHI 60S ribosomal protein L21 OS=Capra hircus OX=9925 GN=RPL21 PE=2 SV=1 && -	-
ENSMUSG00000083087	446.2	278.947	389.092	213.243	253.18	228.36	371.413	231.594	0.681211	8.50512e-05	0.0161164	Gm11249	4	67930881	67931739	+	859	processed_pseudogene	predicted gene 11249 [Source:MGI Symbol;Acc:MGI:3650834] && sp|P25444|RS2_MOUSE 40S ribosomal protein S2 OS=Mus musculus OX=10090 GN=Rps2 PE=1 SV=3 && PF00333:Ribosomal protein S5, N-terminal domain	-
ENSMUSG00000073394	3.19475	2.01406	1.04314	7.61582	12.8425	11.0319	2.08398	10.4967	-2.33282	9.8539e-05	0.0183388	Runx2os1	17	44735845	44737612	+	792	antisense	runt related transcription factor 2, opposite strand 1 [Source:MGI Symbol;Acc:MGI:3641707] && - && -	-
ENSMUSG00000110458	10.6492	17.1195	16.6903	36.3867	30.2716	30.8893	14.8196	32.5159	-1.13344	0.00010176	0.018606	Gm21769	8	20122384	20122494	+	111	processed_pseudogene	predicted gene, 21769 [Source:MGI Symbol;Acc:MGI:5433933] && sp|Q9UNZ2|NSF1C_HUMAN NSFL1 cofactor p47 OS=Homo sapiens OX=9606 GN=NSFL1C PE=1 SV=2 && -	-
ENSMUSG00000088984	9.58424	6.04218	14.604	2.53861	0.91732	2.20638	10.0768	1.88743	2.41597	0.000106158	0.0189258	Gm25604	4	126860980	126861112	-	133	snoRNA	predicted gene, 25604 [Source:MGI Symbol;Acc:MGI:5455381] && - && -	-
ENSMUSG00000113198	14.8658	11.579	9.89563	23.06	33.6733	27.8276	12.1135	28.1869	-1.20954	0.000107141	0.0189258	Gm6988	12	110315990	110316364	+	375	processed_pseudogene	predicted gene 6988 [Source:MGI Symbol;Acc:MGI:3647486] && sp|Q56JX5|RS25_BOVIN 40S ribosomal protein S25 OS=Bos taurus OX=9913 GN=RPS25 PE=2 SV=1 && PF03297:S25 ribosomal protein	-
ENSMUSG00000020990	354.798	254.739	180.32	360.419	420.916	426.049	263.286	402.461	-0.609105	0.000109263	0.0189789	Cdkl1	12	69746848	69791267	-	2041	protein_coding	cyclin-dependent kinase-like 1 (CDC2-related kinase) [Source:MGI Symbol;Acc:MGI:1918341] && sp|Q8CEQ0|CDKL1_MOUSE Cyclin-dependent kinase-like 1 OS=Mus musculus OX=10090 GN=Cdkl1 PE=2 SV=1 && PF00069:Protein kinase domain	-
ENSMUSG00000034892	1641.03	1589.09	2004.92	2337.21	2507.04	2382.89	1745.02	2409.04	-0.465241	0.000114717	0.0192835	Rps29	12	69157722	69159186	-	693	protein_coding	ribosomal protein S29 [Source:MGI Symbol;Acc:MGI:107681] && sp|P62276|RS29_BOVIN 40S ribosomal protein S29 OS=Bos taurus OX=9913 GN=RPS29 PE=3 SV=2 && -	-
ENSMUSG00000091449	33.0124	46.3234	45.8983	66.0038	77.9722	71.7072	41.7447	71.8944	-0.782545	0.000179758	0.0237875	Gm10269	18	20682592	20682963	-	372	protein_coding	predicted gene 10269 [Source:MGI Symbol;Acc:MGI:3642381] && sp|Q6ZWV7|RL35_MOUSE 60S ribosomal protein L35 OS=Mus musculus OX=10090 GN=Rpl35 PE=1 SV=1 && PF00831:Ribosomal L29 protein	-
ENSMUSG00000058897	7.45441	3.02109	2.08629	0	0	0	4.18726	0	4.58156	0.000181974	0.0237875	Col25a1	3	130131501	130599877	+	12947	protein_coding	collagen, type XXV, alpha 1 [Source:MGI Symbol;Acc:MGI:1924268] && sp|Q99MQ5|COPA1_MOUSE Collagen alpha-1(XXV) chain OS=Mus musculus OX=10090 GN=Col25a1 PE=2 SV=2 && -	-
ENSMUSG00000081751	3.19475	3.02109	5.21572	0	0	0	3.81052	0	4.44695	0.000182594	0.0237875	Gm14251	2	156322402	156322680	+	279	processed_pseudogene	predicted gene 14251 [Source:MGI Symbol;Acc:MGI:3650992] && sp|Q3MIC0|RL37A_BOVIN 60S ribosomal protein L37a OS=Bos taurus OX=9913 GN=RPL37A PE=3 SV=3 && -	-
ENSMUSG00000027048	4.25966	5.03515	5.21572	0	0.91732	0	4.83684	0.305773	3.82993	0.000197322	0.0251532	Abcb11	2	69238282	69342616	-	5146	protein_coding	ATP-binding cassette, sub-family B (MDR/TAP), member 11 [Source:MGI Symbol;Acc:MGI:1351619] && sp|Q9QY30|ABCBB_MOUSE Bile salt export pump OS=Mus musculus OX=10090 GN=Abcb11 PE=1 SV=2 && PF00005:ABC transporter|PF00664:ABC transporter transmembrane region	-
ENSMUSG00000115516	59.6353	63.4429	35.4669	132.854	139.433	59.5722	52.8483	110.62	-1.06839	0.000199939	0.0251532	Gm8341	15	19454755	19456352	-	1598	processed_pseudogene	predicted gene 8341 [Source:MGI Symbol;Acc:MGI:3647182] && sp|Q61753|SERA_MOUSE D-3-phosphoglycerate dehydrogenase OS=Mus musculus OX=10090 GN=Phgdh PE=1 SV=3 && -	-
ENSMUSG00000020926	1.06492	0	0	7.61582	6.42124	2.20638	0.354972	5.41448	-3.87476	0.000200318	0.0251532	Adam11	11	102761439	102780262	+	5669	protein_coding	a disintegrin and metallopeptidase domain 11 [Source:MGI Symbol;Acc:MGI:1098667] && sp|Q9R1V4|ADA11_MOUSE Disintegrin and metalloproteinase domain-containing protein 11 OS=Mus musculus OX=10090 GN=Adam11 PE=1 SV=2 && PF01421:Reprolysin (M12B) family zinc metalloprotease|PF08516:ADAM cysteine-rich|PF01562:Reprolysin family propeptide|PF00200:Disintegrin	-
ENSMUSG00000102135	6.38949	9.06327	3.12943	13.5392	23.8503	17.651	6.19406	18.3469	-1.56213	0.000209873	0.025563	Gm37108	1	6916559	6923588	+	626	processed_pseudogene	predicted gene, 37108 [Source:MGI Symbol;Acc:MGI:5610336] && sp|Q5E958|RS8_BOVIN 40S ribosomal protein S8 OS=Bos taurus OX=9913 GN=RPS8 PE=2 SV=3 && PF01201:Ribosomal protein S8e	-
ENSMUSG00000082931	1.06492	0	0	4.23101	6.42124	4.41275	0.354972	5.02167	-3.75613	0.00021355	0.025563	Gm13586	2	38622801	38623264	+	464	processed_pseudogene	predicted gene 13586 [Source:MGI Symbol;Acc:MGI:3649994] && sp|P47915|RL29_MOUSE 60S ribosomal protein L29 OS=Mus musculus OX=10090 GN=Rpl29 PE=1 SV=2 && -	-
ENSMUSG00000087319	0	1.00703	0	8.46203	5.50392	2.20638	0.335677	5.39078	-3.86912	0.000214046	0.025563	Gm15907	13	94137447	94140117	-	2309	lincRNA	predicted gene 15907 [Source:MGI Symbol;Acc:MGI:3801930] && - && -	-
ENSMUSG00000032718	25.558	17.1195	18.7766	11.0006	6.42124	6.61913	20.4847	8.01367	1.34022	0.000214051	0.025563	Mansc1	6	134609207	134632488	-	2376	protein_coding	MANSC domain containing 1 [Source:MGI Symbol;Acc:MGI:1914979] && sp|Q9CR33|MANS1_MOUSE MANSC domain-containing protein 1 OS=Mus musculus OX=10090 GN=Mansc1 PE=2 SV=1 && PF07502:MANEC domain	-
ENSMUSG00000086801	1.06492	1.00703	14.604	0	0	0	5.55865	0	4.99157	0.000215846	0.025563	Gm15943	15	58214475	58324053	+	3821	antisense	predicted gene 15943 [Source:MGI Symbol;Acc:MGI:3802102] && sp|Q8BSF5|KLH38_MOUSE Kelch-like protein 38 OS=Mus musculus OX=10090 GN=Klhl38 PE=2 SV=1 && PF00651:BTB/POZ domain|PF07707:BTB And C-terminal Kelch	-
ENSMUSG00000108442	8.51932	6.04218	5.21572	19.4627	22.0157	12.1351	6.59241	17.8711	-1.44797	0.000241941	0.0283315	Rpl15-ps5	7	97594837	97595441	-	605	processed_pseudogene	ribosomal protein L15, pseudogene 5 [Source:MGI Symbol;Acc:MGI:5010232] && sp|Q5EAD6|RL15_BOVIN 60S ribosomal protein L15 OS=Bos taurus OX=9913 GN=RPL15 PE=2 SV=3 && -	-
ENSMUSG00000100094	3.19475	5.03515	4.17257	12.693	16.5118	9.92869	4.13416	13.0445	-1.6597	0.000263991	0.0299642	1810008I18Rik	7	65803111	65806449	+	2463	lincRNA	RIKEN cDNA 1810008I18 gene [Source:MGI Symbol;Acc:MGI:1920875] && - && -	-
ENSMUSG00000038630	0	0	0	2.53861	5.50392	3.30956	0	3.78403	-4.3086	0.000363686	0.0333612	Zkscan16	4	58943628	58958355	+	2794	protein_coding	zinc finger with KRAB and SCAN domains 16 [Source:MGI Symbol;Acc:MGI:3510405] && sp|Q8TF39|ZN483_HUMAN Zinc finger protein 483 OS=Homo sapiens OX=9606 GN=ZNF483 PE=1 SV=3 && PF02023:SCAN domain|PF00096:Zinc finger, C2H2 type|PF01352:KRAB box	-
ENSMUSG00000057666	316.28	699.886	387.006	2382.06	1187.01	323.234	467.724	1297.44	-1.47209	0.000365019	0.0333612	Gapdh	6	125161715	125166467	-	4133	protein_coding	glyceraldehyde-3-phosphate dehydrogenase [Source:MGI Symbol;Acc:MGI:95640] && sp|P16858|G3P_MOUSE Glyceraldehyde-3-phosphate dehydrogenase OS=Mus musculus OX=10090 GN=Gapdh PE=1 SV=2 && -	-
ENSMUSG00000064542	0	0	0	2.53861	7.33856	2.20638	0	4.02785	-4.40231	0.000368119	0.0333612	Gm22980	4	117154093	117154162	-	70	snoRNA	predicted gene, 22980 [Source:MGI Symbol;Acc:MGI:5452757] && - && -	-
ENSMUSG00000116817	0	0	0	2.53861	7.33856	2.20638	0	4.02785	-4.40231	0.000377476	0.0338627	AC110534.3	17	3097018	3098165	+	1148	processed_pseudogene	kinesin family member 7 (Kif7) pseudogene && sp|Q922S8|KIF2C_MOUSE Kinesin-like protein KIF2C OS=Mus musculus OX=10090 GN=Kif2c PE=1 SV=1 && -	-
ENSMUSG00000079418	185.327	164.212	219.903	111.03	115.752	149.693	189.814	125.491	0.596891	0.000380151	0.0338627	Atg4a	X	140956907	141164270	+	2661	protein_coding	autophagy related 4A, cysteine peptidase [Source:MGI Symbol;Acc:MGI:2147903] && sp|Q8C9S8|ATG4A_MOUSE Cysteine protease ATG4A OS=Mus musculus OX=10090 GN=Atg4a PE=2 SV=2 && PF03416:Peptidase family C54	-
ENSMUSG00000081792	19.1685	12.0844	15.6471	56.6956	37.6101	18.7542	15.6333	37.6866	-1.27868	0.000401958	0.0355017	Anp32b-ps1	4	143389659	143390416	+	758	processed_pseudogene	Bacidic (leucine-rich) nuclear phosphoprotein 32 family, member B, pseudogene 1 [Source:MGI Symbol;Acc:MGI:3651262] && sp|Q9EST5|AN32B_MOUSE Acidic leucine-rich nuclear phosphoprotein 32 family member B OS=Mus musculus OX=10090 GN=Anp32b PE=1 SV=1 && PF14580:Leucine-rich repeat	-
ENSMUSG00000083121	1.06492	2.01406	0	9.30823	6.42124	5.51594	1.02632	7.0818	-2.78259	0.000409061	0.035558	Gm6341	7	101154645	101155055	-	411	processed_pseudogene	predicted pseudogene 6341 [Source:MGI Symbol;Acc:MGI:3643600] && sp|P61356|RL27_BOVIN 60S ribosomal protein L27 OS=Bos taurus OX=9913 GN=RPL27 PE=2 SV=2 && PF01777:Ribosomal L27e protein family	-
ENSMUSG00000020758	28.7527	27.1898	23.9923	47.3873	41.2794	51.8498	26.6449	46.8389	-0.811779	0.000410968	0.035558	Itgb4	11	115974709	116008412	+	7015	protein_coding	integrin beta 4 [Source:MGI Symbol;Acc:MGI:96613] && sp|A2A863|ITB4_MOUSE Integrin beta-4 OS=Mus musculus OX=10090 GN=Itgb4 PE=1 SV=1 && -	-
ENSMUSG00000107770	9.58424	52.3655	28.1649	44.0025	99.0706	103.7	30.0382	82.2576	-1.44957	0.000412831	0.035558	Gm44126	6	76284416	76284929	+	514	processed_pseudogene	predicted gene, 44126 [Source:MGI Symbol;Acc:MGI:5690518] && sp|Q91XL3|UXS1_MOUSE UDP-glucuronic acid decarboxylase 1 OS=Mus musculus OX=10090 GN=Uxs1 PE=1 SV=1 && PF16363:GDP-mannose 4,6 dehydratase|PF11803:UDP-glucuronate decarboxylase N-terminal	-
ENSMUSG00000083337	56.4901	93.6848	59.3738	107.613	110.49	94.0379	69.8496	104.047	-0.575398	0.000414753	1	Gm11539	11	96248633	96249189	+	557	processed_pseudogene	predicted gene 11539 [Source:MGI Symbol;Acc:MGI:3651911] && sp|P35980|RL18_MOUSE 60S ribosomal protein L18 OS=Mus musculus OX=10090 GN=Rpl18 PE=1 SV=3 && -	-
ENSMUSG00000081467	79.8687	107.752	63.6317	170.087	163.283	102.597	83.7509	145.322	-0.796842	0.000576232	0.0425921	Gm13337	2	22067826	22069419	+	1594	processed_pseudogene	predicted gene 13337 [Source:MGI Symbol;Acc:MGI:3650269] && sp|Q61753|SERA_MOUSE D-3-phosphoglycerate dehydrogenase OS=Mus musculus OX=10090 GN=Phgdh PE=1 SV=3 && -	-
ENSMUSG00000059159	96.9073	83.5835	55.2866	126.084	130.259	123.557	78.5925	126.634	-0.688666	0.000582297	0.0427373	Gm8129	6	52346730	52346942	-	213	processed_pseudogene	predicted pseudogene 8129 [Source:MGI Symbol;Acc:MGI:3646863] && sp|Q9JJI8|RL38_MOUSE 60S ribosomal protein L38 OS=Mus musculus OX=10090 GN=Rpl38 PE=1 SV=3 && -	-
ENSMUSG00000027342	3111.91	2694.75	1924.15	3783.55	4124.97	3867.07	2576.94	3925.2	-0.604245	0.000582297	0.0427373	Pcna	2	132249162	132253314	-	2400	protein_coding	proliferating cell nuclear antigen [Source:MGI Symbol;Acc:MGI:97503] && sp|P17918|PCNA_MOUSE Proliferating cell nuclear antigen OS=Mus musculus OX=10090 GN=Pcna PE=1 SV=2 && PF02747:Proliferating cell nuclear antigen, C-terminal domain|PF00705:Proliferating cell nuclear antigen, N-terminal domain	-
ENSMUSG00000082057	1.06492	0	1.04314	2.53861	6.42124	11.0319	0.702686	6.66391	-3.24652	0.000595869	0.0434276	Gm15789	1	66783913	66786445	+	1359	processed_pseudogene	predicted gene 15789 [Source:MGI Symbol;Acc:MGI:3783231] && sp|P18687|CH60_CRIGR 60 kDa heat shock protein, mitochondrial OS=Cricetulus griseus OX=10029 GN=HSPD1 PE=2 SV=1 && -	-
ENSMUSG00000087153	34.0773	54.3796	47.9846	81.2355	92.6494	61.7785	45.4805	78.5545	-0.79002	0.000605969	0.0437835	Gm6483	8	19682449	19697736	+	862	unprocessed_pseudogene	predicted gene 6483 [Source:MGI Symbol;Acc:MGI:3644574] && sp|P55288|CAD11_MOUSE Cadherin-11 OS=Mus musculus OX=10090 GN=Cdh11 PE=1 SV=1 && PF00028:Cadherin domain	-
ENSMUSG00000083328	14.9088	14.0984	12.5177	34.6943	33.0235	19.8574	13.8416	29.1917	-1.08443	0.000609154	0.0437835	Gm11826	4	13482755	13483192	-	438	processed_pseudogene	predicted gene 11826 [Source:MGI Symbol;Acc:MGI:3651142] && sp|P61257|RL26_BOVIN 60S ribosomal protein L26 OS=Bos taurus OX=9913 GN=RPL26 PE=2 SV=1 && -	-
ENSMUSG00000087312	8.51932	1.00703	11.4746	0.846203	0	1.10319	7.00031	0.649797	3.45735	0.000615959	0.0439693	Gm13833	6	31102846	31104646	+	719	lincRNA	predicted gene 13833 [Source:MGI Symbol;Acc:MGI:3650920] && - && -	-
novel.250	0	0	1.04314	2.53861	3.66928	8.82551	0.347714	5.01113	-3.73781	0.000638999	0.0453037	-	GL456212.1	152855	153218	+	241	-	- && - && -	-
ENSMUSG00000069755	7.45441	10.0703	12.5177	3.38481	2.75196	2.20638	10.0141	2.78105	1.83463	0.000643881	0.0453414	Zfp125	12	20877084	20921262	-	3109	transcribed_unprocessed_pseudogene	zinc finger protein 125 [Source:MGI Symbol;Acc:MGI:1336211] && sp|E9QAG8|ZN431_MOUSE Zinc finger protein 431 OS=Mus musculus OX=10090 GN=Znf431 PE=1 SV=1 && -	-
ENSMUSG00000068243	0	0	0	1.69241	6.42124	3.30956	0	3.80774	-4.31661	0.000836836	0.0531799	Gm7079	X	8047229	8047399	+	171	processed_pseudogene	predicted pseudogene 7079 [Source:MGI Symbol;Acc:MGI:3643105] && sp|P62276|RS29_BOVIN 40S ribosomal protein S29 OS=Bos taurus OX=9913 GN=RPS29 PE=3 SV=2 && -	-
ENSMUSG00000097416	0	0	0	3.38481	2.75196	4.41275	0	3.51651	-4.19913	0.000856818	0.0541197	Gm26670	1	191986832	191990138	-	3307	antisense	predicted gene, 26670 [Source:MGI Symbol;Acc:MGI:5477164] && - && -	-
ENSMUSG00000067879	5.32458	3.02109	5.21572	11.8468	11.0078	17.651	4.52046	13.5019	-1.57452	0.00090185	0.0566209	Vxn	1	9601199	9627143	+	3256	protein_coding	vexin [Source:MGI Symbol;Acc:MGI:1924232] && sp|Q8BG31|VEXIN_MOUSE Vexin OS=Mus musculus OX=10090 GN=Vxn PE=2 SV=1 && -	-
ENSMUSG00000082128	3.19475	4.02812	0	14.3854	7.33856	11.0319	2.40762	10.9186	-2.17889	0.000910061	0.0567944	Gm11824	4	14170066	14170911	+	846	processed_pseudogene	predicted gene 11824 [Source:MGI Symbol;Acc:MGI:3651313] && sp|P14206|RSSA_MOUSE 40S ribosomal protein SA OS=Mus musculus OX=10090 GN=Rpsa PE=1 SV=4 && PF16122:40S ribosomal protein SA C-terminus|PF00318:Ribosomal protein S2	-
ENSMUSG00000095762	17.0386	24.1687	18.7766	42.3101	37.6101	31.9925	19.9946	37.3042	-0.901973	0.000918786	0.0569975	Gm16378	8	122841731	122842072	+	342	processed_pseudogene	predicted gene 16378 [Source:MGI Symbol;Acc:MGI:3646886] && sp|P48024|EIF1_MOUSE Eukaryotic translation initiation factor 1 OS=Mus musculus OX=10090 GN=Eif1 PE=1 SV=2 && PF01253:Translation initiation factor SUI1	-
ENSMUSG00000044645	7.45441	5.03515	12.5177	1.69241	2.75196	0	8.33576	1.48146	2.44209	0.00175949	0.0790939	Gm7334	17	50698688	50699443	+	756	processed_pseudogene	predicted gene 7334 [Source:MGI Symbol;Acc:MGI:3647393] && sp|P50615|BTG3_MOUSE Protein BTG3 OS=Mus musculus OX=10090 GN=Btg3 PE=2 SV=1 && PF07742:BTG family	-
ENSMUSG00000105257	1.06492	0	0	6.76962	2.75196	4.41275	0.354972	4.64478	-3.64641	0.00176068	0.0790939	Gm43144	5	96940297	96940781	+	485	TEC	predicted gene 43144 [Source:MGI Symbol;Acc:MGI:5663281] && - && -	-
ENSMUSG00000084033	12.779	8.05624	15.6471	2.53861	4.5866	4.41275	12.1608	3.84599	1.67214	0.00178265	0.079737	Gm7645	2	181292148	181292935	+	788	processed_pseudogene	predicted gene 7645 [Source:MGI Symbol;Acc:MGI:3646877] && sp|Q62070|PIM2_MOUSE Serine/threonine-protein kinase pim-2 OS=Mus musculus OX=10090 GN=Pim2 PE=1 SV=1 && PF00069:Protein kinase domain	-
ENSMUSG00000089542	9.58424	15.1054	13.5609	24.5399	20.181	43.0243	12.7502	29.2484	-1.18753	0.00200789	0.0836944	Gm25835	11	69668852	69668995	-	144	snoRNA	predicted gene, 25835 [Source:MGI Symbol;Acc:MGI:5455612] && - && -	-
ENSMUSG00000083011	13.8439	19.1336	23.9923	43.1563	32.1062	34.1988	18.9899	36.4871	-0.943754	0.00201614	0.0836944	Gm12816	4	112955075	112956286	-	1212	processed_pseudogene	predicted gene 12816 [Source:MGI Symbol;Acc:MGI:3649628] && sp|P27659|RL3_MOUSE 60S ribosomal protein L3 OS=Mus musculus OX=10090 GN=Rpl3 PE=1 SV=3 && PF00297:Ribosomal protein L3	-
ENSMUSG00000083708	38.337	31.2179	15.6471	49.926	50.4526	65.0881	28.4007	55.1556	-0.955407	0.00203501	0.0836944	Gm13123	4	144247777	144248268	+	492	processed_pseudogene	predicted gene 13123 [Source:MGI Symbol;Acc:MGI:3651473] && sp|E9PVA8|GCN1_MOUSE eIF-2-alpha kinase activator GCN1 OS=Mus musculus OX=10090 GN=Gcn1 PE=1 SV=1 && -	-
ENSMUSG00000113019	2.12983	0	0	7.61582	5.50392	5.51594	0.709944	6.2119	-3.15715	0.002036	0.0836944	Gm47467	13	74509598	74522461	-	395	lincRNA	predicted gene, 47467 [Source:MGI Symbol;Acc:MGI:6096433] && sp|E9QAG8|ZN431_MOUSE Zinc finger protein 431 OS=Mus musculus OX=10090 GN=Znf431 PE=1 SV=1 && -	-
ENSMUSG00000046743	0	1.00703	1.04314	11.0006	5.50392	2.20638	0.683391	6.23698	-3.19239	0.00203976	0.0836944	Fat4	3	38886940	39011985	+	17165	protein_coding	FAT atypical cadherin 4 [Source:MGI Symbol;Acc:MGI:3045256] && sp|Q2PZL6|FAT4_MOUSE Protocadherin Fat 4 OS=Mus musculus OX=10090 GN=Fat4 PE=1 SV=2 && PF00008:EGF-like domain|PF02210:Laminin G domain|PF07645:Calcium-binding EGF domain|PF00028:Cadherin domain	-
ENSMUSG00000116655	0	0	0	0.846203	3.66928	7.72232	0	4.07927	-4.40504	0.00211219	0.0863266	AC154507.2	17	15152159	15173058	+	2165	lincRNA	novel transcript && - && -	-
ENSMUSG00000111594	17.0386	28.1968	14.604	47.3873	35.7755	34.1988	19.9465	39.1206	-0.972559	0.00302607	0.099175	Gm3365	8	69554802	69585162	-	1480	unprocessed_pseudogene	predicted gene 3365 [Source:MGI Symbol;Acc:MGI:3781543] && sp|P55288|CAD11_MOUSE Cadherin-11 OS=Mus musculus OX=10090 GN=Cdh11 PE=1 SV=1 && PF00028:Cadherin domain	-
ENSMUSG00000082793	1.06492	0	0	3.38481	2.75196	7.72232	0.354972	4.6197	-3.62232	0.0030588	0.0997705	Gm9308	14	123698141	123698588	-	448	processed_pseudogene	predicted gene 9308 [Source:MGI Symbol;Acc:MGI:3647522] && sp|P20290|BTF3_HUMAN Transcription factor BTF3 OS=Homo sapiens OX=9606 GN=BTF3 PE=1 SV=1 && PF01849:NAC domain	-
ENSMUSG00000097515	0	2.01406	2.08629	10.1544	3.66928	9.92869	1.36678	7.91747	-2.52193	0.00306338	0.0997705	1700040D17Rik	3	94409395	94412919	-	998	lincRNA	RIKEN cDNA 1700040D17 gene [Source:MGI Symbol;Acc:MGI:1923852] && - && -	-
ENSMUSG00000089838	17.0386	17.1195	7.302	30.4633	27.5196	29.7861	13.8201	29.2563	-1.08135	0.00312054	0.100471	Gm2962	1	170925309	170925644	-	336	processed_pseudogene	predicted pseudogene 2962 [Source:MGI Symbol;Acc:MGI:3781140] && sp|Q9D855|QCR7_MOUSE Cytochrome b-c1 complex subunit 7 OS=Mus musculus OX=10090 GN=Uqcrb PE=1 SV=3 && PF02271:Ubiquinol-cytochrome C reductase complex 14kD subunit	-
ENSMUSG00000028194	226.827	258.807	321.288	214.935	167.87	114.732	268.974	165.846	0.694798	0.00312531	0.100471	Ddah1	3	145758675	145894277	+	3983	protein_coding	dimethylarginine dimethylaminohydrolase 1 [Source:MGI Symbol;Acc:MGI:1916469] && sp|Q9CWS0|DDAH1_MOUSE N(G),N(G)-dimethylarginine dimethylaminohydrolase 1 OS=Mus musculus OX=10090 GN=Ddah1 PE=1 SV=3 && PF02274:Amidinotransferase	-
ENSMUSG00000110914	0	0	0	3.38481	4.5866	2.20638	0	3.3926	-4.15582	0.0039377	0.11576	Gm48611	9	41109527	41112081	-	2555	TEC	predicted gene, 48611 [Source:MGI Symbol;Acc:MGI:6098198] && - && -	-
ENSMUSG00000043385	0	1.00703	0	6.76962	4.5866	2.20638	0.335677	4.52087	-3.61476	0.00394309	0.11576	Olfr267	4	58782704	58787716	-	4050	protein_coding	olfactory receptor 267 [Source:MGI Symbol;Acc:MGI:3030101] && sp|Q8NGT1|OR2K2_HUMAN Olfactory receptor 2K2 OS=Homo sapiens OX=9606 GN=OR2K2 PE=2 SV=3 && PF13853:Olfactory receptor	-
ENSMUSG00000097168	4.25966	5.03515	6.25886	0.846203	0	1.10319	5.18456	0.649797	3.03061	0.00395463	0.115773	C230088H06Rik	4	147018235	147492201	-	3492	lincRNA	RIKEN cDNA C230088H06 gene [Source:MGI Symbol;Acc:MGI:2444536] && - && -	-
ENSMUSG00000073403	7.45441	16.1125	18.7766	22.8475	24.7676	58.469	14.1145	35.3614	-1.31557	0.00404389	0.118054	Gm10499	17	36141758	36145923	-	1762	transcribed_unprocessed_pseudogene	predicted gene 10499 [Source:MGI Symbol;Acc:MGI:3702919] && sp|P01898|HA10_MOUSE H-2 class I histocompatibility antigen, Q10 alpha chain OS=Mus musculus OX=10090 GN=H2-Q10 PE=1 SV=3 && -	-
ENSMUSG00000106930	126.855	95.7901	56.0752	131.527	152.582	124.744	92.9068	136.285	-0.54754	0.00410298	0.118927	Gm6450	5	93003831	93004404	+	574	processed_pseudogene	predicted gene 6450 [Source:MGI Symbol;Acc:MGI:3648082] && sp|P51410|RL9_MOUSE 60S ribosomal protein L9 OS=Mus musculus OX=10090 GN=Rpl9 PE=1 SV=2 && PF00347:Ribosomal protein L6	-
ENSMUSG00000084265	8.51932	19.1336	6.25886	27.0785	29.3543	23.167	11.3039	26.5332	-1.22832	0.00410686	0.118927	Gm14541	X	36839137	36839293	-	157	processed_pseudogene	predicted gene 14541 [Source:MGI Symbol;Acc:MGI:3709642] && sp|Q3T051|RL39_BOVIN 60S ribosomal protein L39 OS=Bos taurus OX=9913 GN=RPL39 PE=3 SV=3 && -	-
ENSMUSG00000035413	432.1	458.95	350.745	534.65	637.687	545.996	413.932	572.778	-0.466457	0.00412334	0.118927	Tmem98	11	80810175	80822033	+	1633	protein_coding	transmembrane protein 98 [Source:MGI Symbol;Acc:MGI:1923457] && sp|Q91X86|TMM98_MOUSE Transmembrane protein 98 OS=Mus musculus OX=10090 GN=Tmem98 PE=1 SV=1 && PF13324:Grap2 and cyclin-D-interacting	-
ENSMUSG00000110545	218.308	266.863	206.542	357.098	353.168	273.591	230.571	327.952	-0.509237	0.00412765	0.118927	Gm7730	8	70010549	70011002	-	454	processed_pseudogene	predicted gene 7730 [Source:MGI Symbol;Acc:MGI:3647355] && sp|Q01768|NDKB_MOUSE Nucleoside diphosphate kinase B OS=Mus musculus OX=10090 GN=Nme2 PE=1 SV=1 && -	-
ENSMUSG00000116895	25.558	28.1968	19.8197	26.2323	57.7912	68.3977	24.5248	50.807	-1.04475	0.00732544	0.158469	Gm3435	17	15010176	15022449	+	1716	protein_coding	predicted gene 3435 [Source:MGI Symbol;Acc:MGI:3810125] && sp|Q3B8R1|EMARD_RAT Endoplasmic reticulum membrane-associated RNA degradation protein OS=Rattus norvegicus OX=10116 GN=Ermard PE=2 SV=2 && PF13910:Domain of unknown function (DUF4209)	-
ENSMUSG00000050423	3.19475	3.02109	3.12943	0	0	0	3.11509	0	4.15641	0.00732892	0.158469	Ppp1r3g	13	35958839	35970388	+	2694	protein_coding	protein phosphatase 1, regulatory subunit 3G [Source:MGI Symbol;Acc:MGI:1923737] && sp|Q9CW07|PP13G_MOUSE Protein phosphatase 1 regulatory subunit 3G OS=Mus musculus OX=10090 GN=Ppp1r3g PE=1 SV=2 && PF03370:Carbohydrate/starch-binding module (family 21)	-
ENSMUSG00000037709	21.2983	15.1054	18.7766	25.3861	41.2794	39.7148	18.3934	35.4601	-0.944231	0.00895547	0.170325	Fam13a	6	58932090	59024549	-	10505	protein_coding	family with sequence similarity 13, member A [Source:MGI Symbol;Acc:MGI:1889842] && sp|Q8BGI4|FA13A_MOUSE Protein FAM13A OS=Mus musculus OX=10090 GN=Fam13a PE=1 SV=1 && -	-
ENSMUSG00000107411	0	1.00703	3.12943	3.38481	14.6771	7.72232	1.37882	8.59475	-2.63557	0.00897824	0.170325	Gm19040	6	114738534	114743259	+	4726	processed_pseudogene	predicted gene, 19040 [Source:MGI Symbol;Acc:MGI:5011225] && sp|A2AHC3|CAMP1_MOUSE Calmodulin-regulated spectrin-associated protein 1 OS=Mus musculus OX=10090 GN=Camsap1 PE=1 SV=1 && -	-
ENSMUSG00000082655	0	0	0	5.07722	4.5866	1.10319	0	3.589	-4.24209	0.010153	0.17875	Gm7857	X	134681520	134681877	+	358	processed_pseudogene	predicted gene 7857 [Source:MGI Symbol;Acc:MGI:3644849] && sp|P11250|RL34_RAT 60S ribosomal protein L34 OS=Rattus norvegicus OX=10116 GN=Rpl34 PE=1 SV=3 && -	-
ENSMUSG00000090704	58.5703	44.3093	37.5532	81.2355	106.409	57.3658	46.8109	81.6701	-0.806707	0.0101535	0.17875	Trp53-ps	17	54419680	54420841	+	1162	processed_pseudogene	transformation related protein 53, pseudogene [Source:MGI Symbol;Acc:MGI:98835] && sp|P02340|P53_MOUSE Cellular tumor antigen p53 OS=Mus musculus OX=10090 GN=Tp53 PE=1 SV=4 && -	-
ENSMUSG00000115194	13.8439	17.1195	18.7766	47.3873	33.9409	20.9606	16.58	34.0963	-1.04773	0.0145554	0.209526	Gm48909	14	48695601	48695981	-	381	processed_pseudogene	predicted gene 48909 [Source:MGI Symbol;Acc:MGI:6117475] && sp|Q3T087|RL11_BOVIN 60S ribosomal protein L11 OS=Bos taurus OX=9913 GN=RPL11 PE=2 SV=3 && PF00673:ribosomal L5P family C-terminus	-
ENSMUSG00000112474	20.8122	11.579	5.49757	27.3304	42.0916	16.3127	12.6296	28.5782	-1.16423	0.0146006	1	Gm46209	10	7458356	7458908	+	553	processed_pseudogene	predicted gene, 46209 [Source:MGI Symbol;Acc:MGI:5825846] && sp|Q3T025|RL17_BOVIN 60S ribosomal protein L17 OS=Bos taurus OX=9913 GN=RPL17 PE=2 SV=3 && PF00237:Ribosomal protein L22p/L17e	-
ENSMUSG00000038180	26.6229	35.246	22.9492	43.1563	49.5353	52.953	28.2727	48.5482	-0.775799	0.0245268	0.253339	Spag4	2	156065175	156070617	+	4831	protein_coding	sperm associated antigen 4 [Source:MGI Symbol;Acc:MGI:2444120] && sp|Q9JJF2|SPAG4_MOUSE Sperm-associated antigen 4 protein OS=Mus musculus OX=10090 GN=Spag4 PE=1 SV=3 && -	-
ENSMUSG00000047419	2.12983	3.02109	15.6471	1.69241	0	0	6.93269	0.564135	3.52863	0.0245512	0.25334	Cmya5	13	93040713	93144724	-	11850	protein_coding	cardiomyopathy associated 5 [Source:MGI Symbol;Acc:MGI:1923719] && sp|Q70KF4|CMYA5_MOUSE Cardiomyopathy-associated protein 5 OS=Mus musculus OX=10090 GN=Cmya5 PE=1 SV=2 && -	-
ENSMUSG00000086241	1.06492	3.02109	1.04314	10.1544	14.6771	2.20638	1.70972	9.01264	-2.40068	0.0273387	0.263255	4930483K19Rik	10	76545871	76562226	-	1237	antisense	RIKEN cDNA 4930483K19 gene [Source:MGI Symbol;Acc:MGI:1922203] && sp|Q8BLN5|LSS_MOUSE Lanosterol synthase OS=Mus musculus OX=10090 GN=Lss PE=1 SV=2 && -	-
ENSMUSG00000040775	2.12983	9.06327	8.34515	0	0	2.20638	6.51275	0.735459	3.27777	0.0273419	0.263255	Gm9772	17	22005994	22007599	-	1606	processed_pseudogene	predicted gene 9772 [Source:MGI Symbol;Acc:MGI:3641789] && - && -	-
ENSMUSG00000110558	10.6492	7.04921	5.21572	13.5392	22.0157	19.8574	7.63803	18.4708	-1.27249	0.030185	0.276385	Gm45779	8	72417409	72421472	-	4064	TEC	predicted gene 45779 [Source:MGI Symbol;Acc:MGI:5804894] && - && -	-
ENSMUSG00000078886	3.19475	2.01406	4.17257	0	0	0	3.12713	0	4.16112	0.0301861	0.276385	Gm2026	2	175965331	175980303	+	3043	protein_coding	predicted gene 2026 [Source:MGI Symbol;Acc:MGI:3780195] && sp|Q8BZW4|ZN120_MOUSE Zinc finger protein 120 OS=Mus musculus OX=10090 GN=Zfp120 PE=2 SV=1 && -	-
ENSMUSG00000068262	17.0386	19.1336	22.9492	34.6943	37.6101	33.0956	19.7071	35.1334	-0.835013	0.0302056	0.276385	Gm5879	6	87764996	87766204	-	1209	processed_pseudogene	predicted gene 5879 [Source:MGI Symbol;Acc:MGI:3647624] && sp|P27659|RL3_MOUSE 60S ribosomal protein L3 OS=Mus musculus OX=10090 GN=Rpl3 PE=1 SV=3 && PF00297:Ribosomal protein L3	-
ENSMUSG00000062896	8.51932	16.1125	17.7334	56.6956	33.0235	15.4446	14.1217	35.0546	-1.31757	0.0373146	0.302405	Rpl31-ps11	3	94604408	94604784	-	377	processed_pseudogene	ribosomal protein L31, pseudogene 11 [Source:MGI Symbol;Acc:MGI:3646595] && sp|Q56JX3|RL31_BOVIN 60S ribosomal protein L31 OS=Bos taurus OX=9913 GN=RPL31 PE=2 SV=1 && -	-
ENSMUSG00000089261	5.32458	5.03515	11.4746	0	1.83464	2.20638	7.2781	1.34701	2.4858	0.0373735	0.302647	Mir669n	3	115979902	115979955	+	54	miRNA	microRNA 669n [Source:MGI Symbol;Acc:MGI:3837039] && - && -	-
novel.236	11.7141	9.06327	7.302	19.4627	21.0984	19.8574	9.35978	20.1395	-1.10688	0.0374083	0.302694	-	9	38952587	38958885	+	634	-	- && - && -	-
ENSMUSG00000035498	31.7138	20.0001	21.9903	26.4763	99.9675	89.2401	24.5681	71.8946	-1.54073	0.0398637	0.0393109	Cdcp1	9	123170824	123216038	-	6765	protein_coding	CUB domain containing protein 1 [Source:MGI Symbol;Acc:MGI:2442010] && sp|Q5U462|CDCP1_MOUSE CUB domain-containing protein 1 OS=Mus musculus OX=10090 GN=Cdcp1 PE=2 SV=1 && -	-
ENSMUSG00000026387	3.19475	0	0	5.07722	8.25588	8.82551	1.06492	7.3862	-2.81043	0.039964	0.31013	Sctr	1	120006894	120063536	+	2012	protein_coding	secretin receptor [Source:MGI Symbol;Acc:MGI:2441720] && sp|Q5FWI2|SCTR_MOUSE Secretin receptor OS=Mus musculus OX=10090 GN=Sctr PE=1 SV=1 && PF02793:Hormone receptor domain|PF00002:7 transmembrane receptor (Secretin family)	-
ENSMUSG00000034037	4.25966	8.05624	15.6471	2.53861	0.91732	3.30956	9.32102	2.25516	2.06533	0.0400118	0.31027	Fgd5	6	91978878	92076004	+	6292	protein_coding	FYVE, RhoGEF and PH domain containing 5 [Source:MGI Symbol;Acc:MGI:2443369] && sp|Q80UZ0|FGD5_MOUSE FYVE, RhoGEF and PH domain-containing protein 5 OS=Mus musculus OX=10090 GN=Fgd5 PE=1 SV=2 && -	-
ENSMUSG00000112550	18.1036	23.1617	25.0354	92.2361	45.866	19.8574	22.1002	52.6532	-1.2579	0.0401767	0.311317	Gm6627	10	52341272	52343657	-	2386	processed_pseudogene	predicted gene 6627 [Source:MGI Symbol;Acc:MGI:3644486] && sp|Q61545|EWS_MOUSE RNA-binding protein EWS OS=Mus musculus OX=10090 GN=Ewsr1 PE=1 SV=2 && -	-
ENSMUSG00000019178	1.06492	8.05624	4.17257	0.846203	0	0	4.43124	0.282068	3.70642	0.0402636	0.311759	Styxl1	5	135747220	135778385	-	1770	protein_coding	serine/threonine/tyrosine interacting-like 1 [Source:MGI Symbol;Acc:MGI:1923821] && sp|Q9Y6J8|STYL1_HUMAN Serine/threonine/tyrosine-interacting-like protein 1 OS=Homo sapiens OX=9606 GN=STYXL1 PE=1 SV=1 && PF00782:Dual specificity phosphatase, catalytic domain	-
ENSMUSG00000049414	89.4529	97.6819	98.0555	36.3867	30.2716	83.8423	95.0634	50.1669	0.931037	0.0403229	0.311986	Gm5417	15	83405626	83406063	-	438	processed_pseudogene	predicted gene 5417 [Source:MGI Symbol;Acc:MGI:3648626] && sp|Q6TEK5|VKORL_MOUSE Vitamin K epoxide reductase complex subunit 1-like protein 1 OS=Mus musculus OX=10090 GN=Vkorc1l1 PE=1 SV=1 && PF07884:Vitamin K epoxide reductase family	-
ENSMUSG00000080746	20.2334	23.1617	14.604	35.5405	40.3621	29.7861	19.333	35.2296	-0.867902	0.0428396	0.320291	Rpsa-ps12	4	149142497	149143388	-	892	processed_pseudogene	ribosomal protein SA, pseudogene 12 [Source:MGI Symbol;Acc:MGI:3651234] && sp|P14206|RSSA_MOUSE 40S ribosomal protein SA OS=Mus musculus OX=10090 GN=Rpsa PE=1 SV=4 && PF16122:40S ribosomal protein SA C-terminus	-
ENSMUSG00000082769	14.9088	4.02812	2.08629	18.6165	17.4291	27.5797	7.00774	21.2084	-1.59942	0.0428779	0.320291	Gm15793	1	66849108	66849602	-	495	processed_pseudogene	predicted gene 15793 [Source:MGI Symbol;Acc:MGI:3783235] && sp|P35979|RL12_MOUSE 60S ribosomal protein L12 OS=Mus musculus OX=10090 GN=Rpl12 PE=1 SV=2 && PF03946:Ribosomal protein L11, N-terminal domain|PF00298:Ribosomal protein L11, RNA binding domain	-
ENSMUSG00000097987	1.06492	1.00703	0	9.30823	3.66928	3.30956	0.690648	5.42903	-2.98469	0.0428921	0.320291	Gm17786	8	121581765	121582191	+	427	processed_pseudogene	predicted gene, 17786 [Source:MGI Symbol;Acc:MGI:5009950] && sp|Q3T199|RS23_BOVIN 40S ribosomal protein S23 OS=Bos taurus OX=9913 GN=RPS23 PE=2 SV=1 && -	-
ENSMUSG00000063328	34.0773	28.1968	43.812	55.0032	62.3778	55.1594	35.362	57.5135	-0.703078	0.0440447	0.322379	Gm9396	3	130068412	130068978	+	567	processed_pseudogene	predicted gene 9396 [Source:MGI Symbol;Acc:MGI:3645563] && sp|P35979|RL12_MOUSE 60S ribosomal protein L12 OS=Mus musculus OX=10090 GN=Rpl12 PE=1 SV=2 && PF00298:Ribosomal protein L11, RNA binding domain|PF03946:Ribosomal protein L11, N-terminal domain	-
ENSMUSG00000101210	2.12983	5.03515	2.08629	0	0	0	3.08376	0	4.14401	0.0440507	0.322379	Gm28720	6	86494649	86497804	+	3156	TEC	predicted gene 28720 [Source:MGI Symbol;Acc:MGI:5579426] && - && -	-
ENSMUSG00000078787	23.4281	29.2039	30.2512	11.8468	16.5118	15.4446	27.6277	14.6011	0.925555	0.0449041	0.324318	Cyp2t4	7	27153714	27158668	+	1650	protein_coding	cytochrome P450, family 2, subfamily t, polypeptide 4 [Source:MGI Symbol;Acc:MGI:2686296] && sp|O18809|CP2F3_CAPHI Cytochrome P450 2F3 OS=Capra hircus OX=9925 GN=CYP2F3 PE=2 SV=1 && PF00067:Cytochrome P450	-
ENSMUSG00000065581	0	0	1.04314	1.69241	5.50392	5.51594	0.347714	4.23742	-3.50156	0.0449783	0.324527	Mir194-1	1	185313319	185313385	+	67	miRNA	microRNA 194-1 [Source:MGI Symbol;Acc:MGI:2676858] && - && -	-
ENSMUSG00000105822	1.06492	0	0	2.53861	6.42124	3.30956	0.354972	4.08981	-3.45963	0.0450039	0.324527	Gm42969	3	127390076	127393706	-	3631	TEC	predicted gene 42969 [Source:MGI Symbol;Acc:MGI:5663106] && - && -	-
ENSMUSG00000098224	0	0	0	4.23101	1.83464	3.30956	0	3.12507	-4.03373	0.0488617	0.339039	Gm7985	12	71846311	71847291	-	981	processed_pseudogene	predicted gene 7985 [Source:MGI Symbol;Acc:MGI:3645837] && sp|P16858|G3P_MOUSE Glyceraldehyde-3-phosphate dehydrogenase OS=Mus musculus OX=10090 GN=Gapdh PE=1 SV=2 && -	-
novel.141	50.051	57.4007	51.114	61.7728	78.8896	142.311	52.8552	94.3245	-0.830236	0.0489464	0.3394	-	2	164523366	164529832	-	3128	-	- && - && -	-
ENSMUSG00000109984	1.06492	3.02109	1.04314	7.61582	5.50392	8.82551	1.70972	7.31508	-2.08323	0.0490219	0.339443	Gm38948	7	15971883	15984654	+	688	lincRNA	predicted gene, 38948 [Source:MGI Symbol;Acc:MGI:5621833] && sp|F8VPZ9|BICRA_MOUSE BRD4-interacting chromatin-remodeling complex-associated protein OS=Mus musculus OX=10090 GN=Bicra PE=1 SV=1 && -	-
ENSMUSG00000097304	0	0	0	3.38481	5.50392	1.10319	0	3.33064	-4.13235	0.0490502	0.339443	Rpl31-ps15	3	37734730	37735104	+	375	processed_pseudogene	ribosomal protein L31, pseudogene 15 [Source:MGI Symbol;Acc:MGI:3643738] && sp|Q56JX3|RL31_BOVIN 60S ribosomal protein L31 OS=Bos taurus OX=9913 GN=RPL31 PE=2 SV=1 && -	-
ENSMUSG00000066626	6.38949	5.03515	1.04314	16.9241	17.4291	6.61913	4.15593	13.6574	-1.72568	0.0491413	0.339653	Gm5121	9	57334128	57334754	+	627	processed_pseudogene	predicted gene 5121 [Source:MGI Symbol;Acc:MGI:3647258] && sp|Q5E958|RS8_BOVIN 40S ribosomal protein S8 OS=Bos taurus OX=9913 GN=RPS8 PE=2 SV=3 && PF01201:Ribosomal protein S8e	-
ENSMUSG00000113816	1.06492	4.02812	4.17257	12.693	16.5118	4.41275	3.08854	11.2059	-1.86402	0.0498514	0.34226	Gm47003	13	64291077	64298039	+	1481	antisense	predicted gene, 47003 [Source:MGI Symbol;Acc:MGI:6095679] && sp|Q7RTV5|PXL2C_HUMAN Peroxiredoxin-like 2C OS=Homo sapiens OX=9606 GN=PRXL2C PE=2 SV=1 && -	-
ENSMUSG00000089647	0	1.00703	0	0	3.66928	17.651	0.335677	7.10676	-4.24627	0.0499292	1	Gm2245	15	6604341	6654303	-	3376	antisense	predicted gene 2245 [Source:MGI Symbol;Acc:MGI:3780415] && sp|P67778|PHB_MOUSE Prohibitin OS=Mus musculus OX=10090 GN=Phb PE=1 SV=1 && -	-
ENSMUSG00000109002	4.25966	1.00703	4.17257	0	0	0	3.14642	0	4.1689	0.0499986	1	Gm38405	7	99870666	99889358	-	1481	antisense	predicted gene, 38405 [Source:MGI Symbol;Acc:MGI:5621290] && sp|Q3U3V8|XRRA1_MOUSE X-ray radiation resistance-associated protein 1 OS=Mus musculus OX=10090 GN=Xrra1 PE=2 SV=1 && -	-
ENSMUSG00000039629	54.3107	49.3445	64.6749	43.1563	28.4369	29.7861	56.11	33.7931	0.725407	0.0500193	0.342873	Strip2	6	29917012	29959681	+	8329	protein_coding	striatin interacting protein 2 [Source:MGI Symbol;Acc:MGI:2444363] && sp|Q8C9H6|STRP2_MOUSE Striatin-interacting proteins 2 OS=Mus musculus OX=10090 GN=Strip2 PE=1 SV=1 && PF07923:N1221-like protein|PF11882:Domain of unknown function (DUF3402)	-
ENSMUSG00000065634	0	1.00703	0	1.69241	2.75196	8.82551	0.335677	4.42329	-3.55487	0.0500443	0.342873	Gm24252	19	25166085	25166216	-	132	snoRNA	predicted gene, 24252 [Source:MGI Symbol;Acc:MGI:5454029] && - && -	-
ENSMUSG00000092183	4.25966	7.04921	1.04314	0	0	1.10319	4.11734	0.367729	3.59906	0.0500722	0.342873	4930515G01Rik	5	114773737	114774983	-	1247	antisense	RIKEN cDNA 4930515G01 gene [Source:MGI Symbol;Acc:MGI:1914892] && - && -	-
ENSMUSG00000114251	116.076	122.858	87.624	161.625	165.118	140.105	108.852	155.616	-0.516679	0.0501048	1	Tmed10-ps	13	35990861	35991520	-	660	processed_pseudogene	transmembrane p24 trafficking protein 10, pseudogene [Source:MGI Symbol;Acc:MGI:3782198] && sp|Q9D1D4|TMEDA_MOUSE Transmembrane emp24 domain-containing protein 10 OS=Mus musculus OX=10090 GN=Tmed10 PE=1 SV=1 && PF01105:emp24/gp25L/p24 family/GOLD	-
ENSMUSG00000086193	0	0	0	5.07722	10.0905	0	0	5.05591	-4.73199	0.0501074	0.342889	Gm11508	11	88011991	88048006	-	440	antisense	predicted gene 11508 [Source:MGI Symbol;Acc:MGI:3650928] && sp|Q0VCY7|SRSF1_BOVIN Serine/arginine-rich splicing factor 1 OS=Bos taurus OX=9913 GN=SRSF1 PE=2 SV=1 && -	-
ENSMUSG00000086993	0	2.01406	0	5.92342	4.5866	5.51594	0.671353	5.34199	-2.96405	0.0502819	0.343737	Rsf1os2	7	97650010	97696828	-	3854	antisense	remodeling and spacing factor 1, opposite strand 2 [Source:MGI Symbol;Acc:MGI:3642179] && - && -	-
ENSMUSG00000105174	2.12983	6.04218	3.12943	0	0	1.10319	3.76715	0.367729	3.47177	0.0502973	0.343737	Gm43353	5	113324186	113325480	+	1295	TEC	predicted gene 43353 [Source:MGI Symbol;Acc:MGI:5663490] && - && -	-
ENSMUSG00000006764	1.06492	2.01406	4.17257	5.07722	9.1732	13.2383	2.41718	9.16289	-1.90966	0.0503158	1	Tph2	10	115078641	115185022	-	2879	protein_coding	tryptophan hydroxylase 2 [Source:MGI Symbol;Acc:MGI:2651811] && sp|Q8CGV2|TPH2_MOUSE Tryptophan 5-hydroxylase 2 OS=Mus musculus OX=10090 GN=Tph2 PE=1 SV=2 && PF00351:Biopterin-dependent aromatic amino acid hydroxylase	-
ENSMUSG00000044006	7.45441	7.04921	5.21572	1.69241	0.91732	2.20638	6.57311	1.60537	2.05184	0.0504043	0.343912	Cilp2	8	69880369	69887687	-	4314	protein_coding	cartilage intermediate layer protein 2 [Source:MGI Symbol;Acc:MGI:1915959] && sp|D3Z7H8|CILP2_MOUSE Cartilage intermediate layer protein 2 OS=Mus musculus OX=10090 GN=Cilp2 PE=1 SV=1 && PF00090:Thrombospondin type 1 domain|PF13330:Mucin-2 protein WxxW repeating region|PF13927:Immunoglobulin domain|PF13620:Carboxypeptidase regulatory-like domain	-
ENSMUSG00000089105	1.06492	7.04921	4.17257	0.846203	0	0	4.09557	0.282068	3.59267	0.0504085	0.343912	Gm23115	17	71506436	71506543	-	108	rRNA	predicted gene, 23115 [Source:MGI Symbol;Acc:MGI:5452892] && - && -	-
ENSMUSG00000092574	1.06492	3.02109	0	7.61582	2.75196	13.2383	1.362	7.86868	-2.51013	0.0504219	0.343912	2810047C21Rik1	7	8086326	8093041	-	1179	transcribed_unprocessed_pseudogene	RIKEN cDNA 2810047C21 gene 1 [Source:MGI Symbol;Acc:MGI:1919966] && - && -	-
novel.84	5.32458	2.01406	1.04314	7.61582	7.33856	15.4446	2.79393	10.133	-1.8546	0.0504825	0.343934	-	17	21686032	21687927	+	213	-	- && sp|E9PW05|ZFP54_MOUSE Zinc finger protein 54 OS=Mus musculus OX=10090 GN=Zfp54 PE=2 SV=1 && PF01352:KRAB box	-
novel.33	0	1.00703	0	4.23101	3.66928	3.30956	0.335677	3.73662	-3.33182	0.0504912	0.343934	-	11	6757644	6758390	+	747	-	- && - && -	-
ENSMUSG00000093826	7.45441	3.02109	3.12943	13.5392	13.7598	9.92869	4.53498	12.4092	-1.46291	0.0504951	1	Gm6900	7	10656479	10656820	-	342	processed_pseudogene	predicted gene 6900 [Source:MGI Symbol;Acc:MGI:3645052] && sp|P48024|EIF1_MOUSE Eukaryotic translation initiation factor 1 OS=Mus musculus OX=10090 GN=Eif1 PE=1 SV=2 && PF01253:Translation initiation factor SUI1	-
ENSMUSG00000114951	24.4931	18.1265	15.6471	36.3867	30.2716	36.4052	19.4222	34.3545	-0.823415	0.050569	1	Gm20784	13	119962244	119963489	+	1246	processed_pseudogene	predicted gene, 20784 [Source:MGI Symbol;Acc:MGI:5434140] && sp|Q0VGB7|PP4R2_MOUSE Serine/threonine-protein phosphatase 4 regulatory subunit 2 OS=Mus musculus OX=10090 GN=Ppp4r2 PE=1 SV=1 && PF09184:PPP4R2	-
ENSMUSG00000114541	0	0	0	2.53861	2.75196	3.30956	0	2.86671	-3.90528	0.0505753	0.344159	Gm29680	13	90179217	90217142	-	2823	lincRNA	predicted gene, 29680 [Source:MGI Symbol;Acc:MGI:5588839] && - && -	-
ENSMUSG00000051682	0	0	0	2.53861	2.75196	3.30956	0	2.86671	-3.90528	0.0506206	0.344159	Treml4	17	48264295	48275360	+	1997	protein_coding	triggering receptor expressed on myeloid cells-like 4 [Source:MGI Symbol;Acc:MGI:1923239] && sp|Q3LRV9|TRML4_MOUSE Trem-like transcript 4 protein OS=Mus musculus OX=10090 GN=Treml4 PE=1 SV=1 && PF07686:Immunoglobulin V-set domain	-
ENSMUSG00000048483	2.12983	3.02109	3.12943	0	0	0	2.76012	0	3.98262	0.0506232	0.344159	Zdhhc22	12	86980763	86990430	-	3651	protein_coding	zinc finger, DHHC-type containing 22 [Source:MGI Symbol;Acc:MGI:2685108] && sp|A0PK84|ZDH22_MOUSE Palmitoyltransferase ZDHHC22 OS=Mus musculus OX=10090 GN=Zdhhc22 PE=1 SV=1 && PF01529:DHHC palmitoyltransferase	-
ENSMUSG00000071867	9.58424	16.1125	13.5609	38.0791	32.1062	14.3414	13.0859	28.1756	-1.11332	0.0506824	0.344337	Gm6304	18	15011246	15011692	+	447	processed_pseudogene	predicted gene 6304 [Source:MGI Symbol;Acc:MGI:3647929] && sp|Q99N92|RM27_MOUSE 39S ribosomal protein L27, mitochondrial OS=Mus musculus OX=10090 GN=Mrpl27 PE=1 SV=1 && PF01016:Ribosomal L27 protein	-
ENSMUSG00000113753	8.51932	7.04921	4.17257	28.7709	11.9252	11.0319	6.58037	17.2426	-1.39985	0.0507244	1	Gm5791	13	64624272	64624760	-	489	processed_pseudogene	predicted gene 5791 [Source:MGI Symbol;Acc:MGI:3648515] && sp|P14851|PPIA_CRIGR Peptidyl-prolyl cis-trans isomerase A OS=Cricetulus griseus OX=10029 GN=PPIA PE=2 SV=2 && PF00160:Cyclophilin type peptidyl-prolyl cis-trans isomerase/CLD	-
ENSMUSG00000070287	0	0	5.21572	9.30823	11.0078	8.82551	1.73857	9.71386	-2.48568	0.050748	0.344558	Slc35g2	9	100552188	100571090	-	1590	protein_coding	solute carrier family 35, member G2 [Source:MGI Symbol;Acc:MGI:2685365] && sp|D3YVE8|S35G2_MOUSE Solute carrier family 35 member G2 OS=Mus musculus OX=10090 GN=Slc35g2 PE=1 SV=1 && PF00892:EamA-like transporter family	-
ENSMUSG00000062432	27.6878	30.2109	36.51	13.5392	18.3464	20.9606	31.4696	17.6154	0.846553	0.0508101	0.344718	Cyp26c1	19	37685581	37693398	+	1747	protein_coding	cytochrome P450, family 26, subfamily c, polypeptide 1 [Source:MGI Symbol;Acc:MGI:2679699] && sp|Q6V0L0|CP26C_HUMAN Cytochrome P450 26C1 OS=Homo sapiens OX=9606 GN=CYP26C1 PE=2 SV=2 && PF00067:Cytochrome P450	-
ENSMUSG00000109224	6.38949	2.01406	1.04314	0	0	0	3.1489	0	4.17001	0.0508553	0.344718	Tmem147os	7	30734739	30756126	+	456	processed_transcript	transmembrane protein 147, opposite strand [Source:MGI Symbol;Acc:MGI:3642392] && sp|Q8CIT9|SBSN_MOUSE Suprabasin OS=Mus musculus OX=10090 GN=Sbsn PE=2 SV=1 && -	-
ENSMUSG00000030543	6.38949	2.01406	1.04314	0	0	0	3.1489	0	4.17001	0.0508708	0.344718	Mesp2	7	79810727	79813439	+	1944	protein_coding	mesoderm posterior 2 [Source:MGI Symbol;Acc:MGI:1096325] && sp|O08574|MESP2_MOUSE Mesoderm posterior protein 2 OS=Mus musculus OX=10090 GN=Mesp2 PE=1 SV=1 && PF00010:Helix-loop-helix DNA-binding domain	-
ENSMUSG00000104910	0	0	0	1.69241	2.75196	4.41275	0	2.95237	-3.9417	0.0509868	0.345279	Gm43331	3	105787633	105789321	-	1689	sense_intronic	predicted gene 43331 [Source:MGI Symbol;Acc:MGI:5663468] && sp|P11369|LORF2_MOUSE LINE-1 retrotransposable element ORF2 protein OS=Mus musculus OX=10090 GN=Pol PE=1 SV=2 && -	-
ENSMUSG00000116089	0	0	0	1.69241	2.75196	4.41275	0	2.95237	-3.9417	0.0509909	1	Gm7859	15	68715009	68715763	-	755	processed_pseudogene	predicted gene 7859 [Source:MGI Symbol;Acc:MGI:3646834] && sp|Q9QZ23|NFU1_MOUSE NFU1 iron-sulfur cluster scaffold homolog, mitochondrial OS=Mus musculus OX=10090 GN=Nfu1 PE=1 SV=2 && PF01106:NifU-like domain|PF08712:Scaffold protein Nfu/NifU N terminal	-
ENSMUSG00000106962	3.19475	4.02812	1.04314	13.5392	4.5866	11.0319	2.75534	9.71924	-1.81608	0.0509974	1	Gm43633	6	127485793	127488122	+	2330	TEC	predicted gene 43633 [Source:MGI Symbol;Acc:MGI:5663770] && sp|P11369|LORF2_MOUSE LINE-1 retrotransposable element ORF2 protein OS=Mus musculus OX=10090 GN=Pol PE=1 SV=2 && PF17490:L1 transposable element dsRBD-like domain	-
ENSMUSG00000058357	1.06492	0	0	0.846203	9.1732	3.30956	0.354972	4.44299	-3.57771	0.0510419	0.345428	Gm6612	15	80952505	80952899	+	395	processed_pseudogene	predicted gene 6612 [Source:MGI Symbol;Acc:MGI:3648604] && sp|P05496|AT5G1_HUMAN ATP synthase F(0) complex subunit C1, mitochondrial OS=Homo sapiens OX=9606 GN=ATP5MC1 PE=1 SV=2 && -	-
ENSMUSG00000108354	7.45441	7.04921	2.08629	14.3854	14.6771	13.2383	5.52997	14.1003	-1.35126	0.0511342	0.34567	4931431B13Rik	7	128192050	128203328	-	1437	processed_transcript	RIKEN cDNA 4931431B13 gene [Source:MGI Symbol;Acc:MGI:1918223] && sp|Q3V0T4|ITAD_MOUSE Integrin alpha-D OS=Mus musculus OX=10090 GN=Itgad PE=1 SV=1 && -	-
ENSMUSG00000105556	23.4281	16.1125	42.7689	39.7715	46.7833	77.2232	27.4365	54.5927	-0.989059	0.0511759	0.34567	Gm43080	3	35969384	35972026	-	2643	TEC	predicted gene 43080 [Source:MGI Symbol;Acc:MGI:5663217] && - && -	-
ENSMUSG00000110669	36.2071	74.5202	54.2434	97.3133	80.7242	89.3583	54.9903	89.1319	-0.695375	0.0511771	0.34567	Gm10060	8	19784746	19784856	+	111	processed_pseudogene	predicted gene 10060 [Source:MGI Symbol;Acc:MGI:3710638] && sp|Q9UNZ2|NSF1C_HUMAN NSFL1 cofactor p47 OS=Homo sapiens OX=9606 GN=NSFL1C PE=1 SV=2 && -	-
ENSMUSG00000078915	4.25966	0	12.5177	0.846203	0	0	5.59246	0.282068	4.03782	0.0511916	1	Hsp25-ps1	13	45078498	45079127	-	630	processed_pseudogene	heat shock protein 25, pseudogene 1 [Source:MGI Symbol;Acc:MGI:96241] && sp|P14602|HSPB1_MOUSE Heat shock protein beta-1 OS=Mus musculus OX=10090 GN=Hspb1 PE=1 SV=3 && PF00011:Hsp20/alpha crystallin family	-
ENSMUSG00000036687	0	2.01406	0	3.38481	10.0905	3.30956	0.671353	5.59497	-3.03626	0.0512419	0.345682	Tmem184a	5	139802485	139819917	-	5277	protein_coding	transmembrane protein 184a [Source:MGI Symbol;Acc:MGI:2385897] && sp|Q3UFJ6|T184A_MOUSE Transmembrane protein 184A OS=Mus musculus OX=10090 GN=Tmem184a PE=1 SV=1 && -	-
ENSMUSG00000083033	14.9088	11.0773	5.21572	28.7709	22.933	16.5478	10.4006	22.7506	-1.13657	0.0512453	0.345682	Gm9083	X	20239469	20240287	+	819	processed_pseudogene	predicted gene 9083 [Source:MGI Symbol;Acc:MGI:3644452] && sp|Q2L9X0|RSSA_CHLAE 40S ribosomal protein SA OS=Chlorocebus aethiops OX=9534 GN=RPSA PE=2 SV=3 && PF16122:40S ribosomal protein SA C-terminus	-
ENSMUSG00000030336	22.3632	30.2109	28.1649	43.1563	38.5275	50.7467	26.913	44.1435	-0.709248	0.0513378	0.345915	Cd27	6	125232622	125237010	-	2328	protein_coding	CD27 antigen [Source:MGI Symbol;Acc:MGI:88326] && sp|P41272|CD27_MOUSE CD27 antigen OS=Mus musculus OX=10090 GN=Cd27 PE=2 SV=1 && -	-
ENSMUSG00000028291	1291.74	1368.55	1270.55	1109.37	1091.61	921.162	1310.28	1040.72	0.331803	0.0513585	0.345915	Akirin2	4	34550937	34566908	+	1711	protein_coding	akirin 2 [Source:MGI Symbol;Acc:MGI:1889364] && sp|B1AXD8|AKIR2_MOUSE Akirin-2 OS=Mus musculus OX=10090 GN=Akirin2 PE=1 SV=1 && -	-
ENSMUSG00000079505	39.4019	39.2742	26.0786	22.8475	21.0984	14.3414	34.9182	19.4291	0.836382	0.0513799	0.345915	Gm11131	17	35377021	35380292	-	3122	antisense	predicted gene 11131 [Source:MGI Symbol;Acc:MGI:3779386] && sp|P01901|HA1B_MOUSE H-2 class I histocompatibility antigen, K-B alpha chain OS=Mus musculus OX=10090 GN=H2-K1 PE=1 SV=1 && -	-
ENSMUSG00000097073	2.12983	2.01406	4.17257	5.07722	13.7598	8.82551	2.77215	9.22084	-1.73233	0.0514126	0.345915	9430037G07Rik	9	88595325	88599516	-	3767	lincRNA	RIKEN cDNA 9430037G07 gene [Source:MGI Symbol;Acc:MGI:2444544] && sp|Q2KII4|ELOC_BOVIN Elongin-C OS=Bos taurus OX=9913 GN=ELOC PE=1 SV=1 && -	-
novel.155	6.38949	5.03515	8.34515	0	0.91732	3.30956	6.58993	1.40896	2.30887	0.0514871	0.346193	-	3	18290171	18290652	-	482	-	- && - && -	-
ENSMUSG00000112640	3.19475	2.01406	4.17257	7.61582	12.8425	7.72232	3.12713	9.39354	-1.59233	0.0514988	1	Gm32687	10	81863934	81881081	+	2379	protein_coding	predicted gene, 32687 [Source:MGI Symbol;Acc:MGI:5591846] && sp|E9QAG8|ZN431_MOUSE Zinc finger protein 431 OS=Mus musculus OX=10090 GN=Znf431 PE=1 SV=1 && PF01352:KRAB box|PF00096:Zinc finger, C2H2 type	-
novel.159	48.9861	44.3093	39.6394	27.0785	33.0235	19.8574	44.3116	26.6531	0.725886	0.051556	0.346328	-	3	116835416	116837092	-	1252	-	- && - && -	-
ENSMUSG00000113606	1.06492	1.00703	0	7.61582	4.5866	2.20638	0.690648	4.80293	-2.81027	0.0516113	0.346328	Gm47441	12	23903253	23903369	+	117	processed_pseudogene	predicted gene, 47441 [Source:MGI Symbol;Acc:MGI:6096395] && sp|Q9CY27|TECR_MOUSE Very-long-chain enoyl-CoA reductase OS=Mus musculus OX=10090 GN=Tecr PE=1 SV=1 && -	-
ENSMUSG00000027849	0	0	0	5.07722	2.75196	1.10319	0	2.97746	-3.97364	0.0516292	0.346328	Syt6	3	103575231	103645569	+	5828	protein_coding	synaptotagmin VI [Source:MGI Symbol;Acc:MGI:1859544] && sp|Q9R0N8|SYT6_MOUSE Synaptotagmin-6 OS=Mus musculus OX=10090 GN=Syt6 PE=1 SV=2 && -	-
ENSMUSG00000104030	6.38949	4.02812	4.17257	0.846203	0.91732	1.10319	4.86339	0.95557	2.35746	0.0516564	0.346328	5330406M23Rik	6	31108827	31110920	-	2094	TEC	RIKEN cDNA 5330406M23 gene [Source:MGI Symbol;Acc:MGI:1923921] && - && -	-
ENSMUSG00000032369	517.549	550.845	537.219	436.641	452.239	367.362	535.204	418.747	0.352952	0.0517006	0.346328	Plscr1	9	92249750	92272278	+	2462	protein_coding	phospholipid scramblase 1 [Source:MGI Symbol;Acc:MGI:893575] && sp|Q9JJ00|PLS1_MOUSE Phospholipid scramblase 1 OS=Mus musculus OX=10090 GN=Plscr1 PE=1 SV=1 && PF03803:Scramblase	-
ENSMUSG00000056144	87.3231	94.6608	95.9692	53.3108	74.3029	65.0881	92.651	64.2339	0.530496	0.0517262	0.346328	Trim34a	7	104244457	104262234	+	2592	protein_coding	tripartite motif-containing 34A [Source:MGI Symbol;Acc:MGI:2137359] && sp|Q99PP6|TR34A_MOUSE Tripartite motif-containing protein 34A OS=Mus musculus OX=10090 GN=Trim34a PE=2 SV=2 && PF00643:B-box zinc finger|PF00622:SPRY domain|PF13920:Zinc finger, C3HC4 type (RING finger)	-
ENSMUSG00000019836	6.38949	4.02812	8.34515	11.0006	14.6771	18.7542	6.25425	14.8107	-1.23845	0.0517398	0.346328	Amd-ps4	4	51253025	51254027	-	1003	processed_pseudogene	S-adenosylmethionine decarboxylase, pseudogene 4 [Source:MGI Symbol;Acc:MGI:3650439] && sp|P0DMN7|DCAM1_MOUSE S-adenosylmethionine decarboxylase proenzyme 1 OS=Mus musculus OX=10090 GN=Amd1 PE=1 SV=1 && -	-
ENSMUSG00000110997	3.19475	4.02812	7.302	7.61582	13.7598	17.651	4.84162	13.0089	-1.41568	0.0517406	1	2610028D06Rik	9	45797348	45799060	-	1713	TEC	RIKEN cDNA 2610028D06 gene [Source:MGI Symbol;Acc:MGI:1923609] && - && -	-
ENSMUSG00000071653	2.12983	4.02812	9.38829	0	1.83464	0	5.18208	0.611547	3.05563	0.0517788	0.346337	1810009A15Rik	19	8888853	8890881	+	1444	protein_coding	RIKEN cDNA 1810009A15 gene [Source:MGI Symbol;Acc:MGI:1913526] && sp|Q9D937|CK098_MOUSE Uncharacterized protein C11orf98 homolog OS=Mus musculus OX=10090 PE=1 SV=1 && -	-
ENSMUSG00000060284	3.19475	1.00703	4.17257	0	0	0	2.79145	0	3.99652	0.0518076	0.346337	Sp7	15	102356606	102367182	-	3398	protein_coding	Sp7 transcription factor 7 [Source:MGI Symbol;Acc:MGI:2153568] && sp|Q8VI67|SP7_MOUSE Transcription factor Sp7 OS=Mus musculus OX=10090 GN=Sp7 PE=1 SV=1 && PF00096:Zinc finger, C2H2 type	-
ENSMUSG00000046818	12.779	8.05624	4.17257	4.23101	0.91732	1.10319	8.33593	2.08384	1.96248	0.0518898	0.346424	Ddit4l	3	137621612	137628333	+	2916	protein_coding	DNA-damage-inducible transcript 4-like [Source:MGI Symbol;Acc:MGI:1920534] && sp|Q8VHZ5|DDT4L_MOUSE DNA damage-inducible transcript 4-like protein OS=Mus musculus OX=10090 GN=Ddit4l PE=2 SV=1 && PF07809:RTP801 C-terminal region	-
ENSMUSG00000111938	1.06492	3.02109	4.17257	0	0	0	2.75286	0	3.97932	0.0519167	0.346424	2900045O20Rik	12	4509317	4522370	+	1292	lincRNA	RIKEN cDNA 2900045O20 gene [Source:MGI Symbol;Acc:MGI:1920205] && - && -	-
ENSMUSG00000093483	8.51932	9.06327	8.34515	18.6165	18.3464	15.4446	8.64258	17.4692	-1.01853	0.0519239	0.346424	AA465934	11	83291699	83294632	+	711	processed_transcript	expressed sequence AA465934 [Source:MGI Symbol;Acc:MGI:2671018] && - && -	-
ENSMUSG00000085893	3.19475	1.00703	0	5.92342	11.9252	3.30956	1.40059	7.05272	-2.34745	0.0519536	0.346424	Gm12091	11	29601784	29602613	-	830	processed_pseudogene	predicted gene 12091 [Source:MGI Symbol;Acc:MGI:3650089] && sp|P25444|RS2_MOUSE 40S ribosomal protein S2 OS=Mus musculus OX=10090 GN=Rps2 PE=1 SV=3 && -	-
ENSMUSG00000079480	176.776	199.392	243.052	259.784	256.85	354.123	206.407	290.252	-0.490174	0.0521024	0.346973	Pin4	X	102119447	102127669	+	651	protein_coding	protein (peptidyl-prolyl cis/trans isomerase) NIMA-interacting, 4 (parvulin) [Source:MGI Symbol;Acc:MGI:1916963] && sp|Q9Y237|PIN4_HUMAN Peptidyl-prolyl cis-trans isomerase NIMA-interacting 4 OS=Homo sapiens OX=9606 GN=PIN4 PE=1 SV=1 && -	-
ENSMUSG00000082550	2.12983	0	0	2.53861	9.1732	4.41275	0.709944	5.37485	-2.94178	0.0521175	0.346973	Gm12344	11	77107852	77108180	-	329	processed_pseudogene	predicted gene 12344 [Source:MGI Symbol;Acc:MGI:3649822] && sp|Q9CR51|VATG1_MOUSE V-type proton ATPase subunit G 1 OS=Mus musculus OX=10090 GN=Atp6v1g1 PE=1 SV=3 && PF03179:Vacuolar (H+)-ATPase G subunit	-
ENSMUSG00000065460	7.45441	12.0844	17.7334	20.3089	13.7598	60.6754	12.4241	31.5813	-1.33692	0.0521359	0.346973	Mir133a-2	2	180398379	180398482	+	104	miRNA	microRNA 133a-2 [Source:MGI Symbol;Acc:MGI:3618718] && - && -	-
ENSMUSG00000109638	7.45441	4.02812	2.08629	0	0.91732	1.10319	4.52294	0.673503	2.80697	0.0521915	1	Gm45630	7	142051165	142053075	-	1911	TEC	predicted gene 45630 [Source:MGI Symbol;Acc:MGI:5791466] && - && -	-
ENSMUSG00000079492	7.45441	4.02812	11.4746	13.5392	11.9252	33.0956	7.65237	19.52	-1.34271	0.0522109	0.34725	Gm11127	17	36055816	36058371	-	1344	protein_coding	predicted gene 11127 [Source:MGI Symbol;Acc:MGI:3779381] && sp|P16391|HA12_RAT RT1 class I histocompatibility antigen, AA alpha chain OS=Rattus norvegicus OX=10116 PE=1 SV=2 && PF00129:Class I Histocompatibility antigen, domains alpha 1 and 2|PF07654:Immunoglobulin C1-set domain	-
ENSMUSG00000052303	0	1.00703	0	1.69241	4.5866	4.41275	0.335677	3.56392	-3.25268	0.0522681	0.347409	Mrgpra6	7	47185707	47204920	-	1091	protein_coding	MAS-related GPR, member A6 [Source:MGI Symbol;Acc:MGI:3033107] && sp|Q91ZC6|MRGA6_MOUSE Mas-related G-protein coupled receptor member A6 OS=Mus musculus OX=10090 GN=Mrgpra6 PE=2 SV=2 && PF00001:7 transmembrane receptor (rhodopsin family)	-
ENSMUSG00000100078	22.3632	14.0984	13.5609	24.5399	38.5275	28.6829	16.6742	30.5834	-0.876849	0.052313	1	Gm6170	1	128520073	128521460	-	1388	processed_pseudogene	predicted gene 6170 [Source:MGI Symbol;Acc:MGI:3643368] && sp|P62629|EF1A1_CRIGR Elongation factor 1-alpha 1 OS=Cricetulus griseus OX=10029 GN=EEF1A1 PE=2 SV=1 && -	-
ENSMUSG00000005681	6.38949	4.02812	19.8197	17.7703	19.2637	41.9212	10.0791	26.3184	-1.37983	0.052364	0.347779	Apoa2	1	171225054	171226379	+	537	protein_coding	apolipoprotein A-II [Source:MGI Symbol;Acc:MGI:88050] && sp|P09813|APOA2_MOUSE Apolipoprotein A-II OS=Mus musculus OX=10090 GN=Apoa2 PE=1 SV=2 && PF04711:Apolipoprotein A-II (ApoA-II)	-
ENSMUSG00000077884	3.19475	1.00703	11.4746	0	0.91732	1.10319	5.22545	0.673503	3.00858	0.0523904	0.347779	Gm24557	1	63161855	63161943	+	89	miRNA	predicted gene, 24557 [Source:MGI Symbol;Acc:MGI:5454334] && - && -	-
ENSMUSG00000099708	10.6492	16.1125	19.8197	27.0785	29.3543	27.5797	15.5271	28.0041	-0.84945	0.0524634	1	Gm29361	12	83631834	83633833	-	2000	antisense	predicted gene 29361 [Source:MGI Symbol;Acc:MGI:5580067] && - && -	-
ENSMUSG00000101502	6.38949	3.02109	4.17257	11.8468	15.5944	7.72232	4.52772	11.7212	-1.38408	0.0525087	1	Rpl7a-ps10	9	97179179	97179976	+	798	processed_pseudogene	ribosomal protein L7A, pseudogene 10 [Source:MGI Symbol;Acc:MGI:3647131] && sp|P12970|RL7A_MOUSE 60S ribosomal protein L7a OS=Mus musculus OX=10090 GN=Rpl7a PE=1 SV=2 && PF01248:Ribosomal protein L7Ae/L30e/S12e/Gadd45 family	-
ENSMUSG00000062458	19.1685	14.0984	6.25886	31.3095	22.933	25.3733	13.1753	26.5386	-1.01319	0.0525192	1	Gm8623	8	47632329	47632764	-	436	processed_pseudogene	predicted gene 8623 [Source:MGI Symbol;Acc:MGI:3644689] && sp|Q3T0X6|RS16_BOVIN 40S ribosomal protein S16 OS=Bos taurus OX=9913 GN=RPS16 PE=2 SV=3 && -	-
ENSMUSG00000049892	1.06492	1.00703	2.08629	4.23101	5.50392	7.72232	1.38608	5.81908	-2.06101	0.0525559	0.347902	Rasd1	11	59963181	59964944	-	1611	protein_coding	RAS, dexamethasone-induced 1 [Source:MGI Symbol;Acc:MGI:1270848] && sp|O35626|RASD1_MOUSE Dexamethasone-induced Ras-related protein 1 OS=Mus musculus OX=10090 GN=Rasd1 PE=1 SV=1 && PF00071:Ras family	-
ENSMUSG00000050856	126.725	165.153	157.515	189.549	188.968	237.185	149.797	205.234	-0.451962	0.0525703	0.347902	Atp5k	5	108433244	108434448	-	616	protein_coding	ATP synthase, H+ transporting, mitochondrial F1F0 complex, subunit E [Source:MGI Symbol;Acc:MGI:106636] && sp|Q06185|ATP5I_MOUSE ATP synthase subunit e, mitochondrial OS=Mus musculus OX=10090 GN=Atp5me PE=1 SV=2 && -	-
ENSMUSG00000080753	1.06492	2.01406	5.21572	0	0	0	2.7649	0	3.9847	0.0525774	0.347902	Gm15613	5	32479560	32479885	-	326	processed_pseudogene	predicted gene 15613 [Source:MGI Symbol;Acc:MGI:3783058] && - && -	-
ENSMUSG00000081967	0	1.00703	0	3.38481	4.5866	2.20638	0.335677	3.3926	-3.19565	0.0525937	0.347902	Gm14017	2	121481129	121481514	+	386	processed_pseudogene	predicted gene 14017 [Source:MGI Symbol;Acc:MGI:3702155] && sp|Q9CPY1|RM51_MOUSE 39S ribosomal protein L51, mitochondrial OS=Mus musculus OX=10090 GN=Mrpl51 PE=1 SV=1 && -	-
ENSMUSG00000078922	17.0386	19.1336	76.1495	16.0779	12.8425	17.651	37.4406	15.5238	1.27173	0.0526291	0.347902	Tgtp1	11	48985327	48994172	-	3205	protein_coding	T cell specific GTPase 1 [Source:MGI Symbol;Acc:MGI:98734] && sp|Q62293|TGTP1_MOUSE T-cell-specific guanine nucleotide triphosphate-binding protein 1 OS=Mus musculus OX=10090 GN=Tgtp1 PE=1 SV=1 && PF05049:Interferon-inducible GTPase (IIGP)	-
ENSMUSG00000086387	1.06492	0	0	5.92342	0.91732	4.41275	0.354972	3.75116	-3.33508	0.0526294	0.347902	Gm15563	9	66572001	66582059	+	410	antisense	predicted gene 15563 [Source:MGI Symbol;Acc:MGI:3783012] && - && -	-
ENSMUSG00000023781	6.38949	4.02812	13.5609	3.38481	0.91732	2.20638	7.99282	2.1695	1.87077	0.0526427	0.347902	Hes7	11	69120404	69124055	+	1809	protein_coding	hes family bHLH transcription factor 7 [Source:MGI Symbol;Acc:MGI:2135679] && sp|Q8BKT2|HES7_MOUSE Transcription factor HES-7 OS=Mus musculus OX=10090 GN=Hes7 PE=1 SV=1 && -	-
ENSMUSG00000083041	5.32458	3.02109	4.17257	0	0.91732	1.10319	4.17275	0.673503	2.69318	0.052702	0.348034	Gmfg-ps	6	4893352	4893778	-	427	processed_pseudogene	glia maturation factor, gamma, pseudogene [Source:MGI Symbol;Acc:MGI:3704264] && sp|Q9ERL7|GMFG_MOUSE Glia maturation factor gamma OS=Mus musculus OX=10090 GN=Gmfg PE=1 SV=1 && PF00241:Cofilin/tropomyosin-type actin-binding protein	-
ENSMUSG00000100865	13.8439	19.1336	9.38829	23.6937	22.933	34.1988	14.1219	26.9418	-0.923779	0.0527294	0.348034	Gm9320	17	70853767	70876312	+	790	transcribed_processed_pseudogene	predicted gene 9320 [Source:MGI Symbol;Acc:MGI:3645000] && sp|P62847|RS24_HUMAN 40S ribosomal protein S24 OS=Homo sapiens OX=9606 GN=RPS24 PE=1 SV=1 && PF01282:Ribosomal protein S24e	-
ENSMUSG00000020415	253.45	231.617	269.131	215.782	188.968	156.653	251.399	187.134	0.423194	0.0527699	0.348081	Pttg1	11	43420250	43426251	-	2000	protein_coding	pituitary tumor-transforming gene 1 [Source:MGI Symbol;Acc:MGI:1353578] && sp|Q9CQJ7|PTTG1_MOUSE Securin OS=Mus musculus OX=10090 GN=Pttg1 PE=1 SV=1 && PF04856:Securin sister-chromatid separation inhibitor	-
ENSMUSG00000030735	6.38949	15.1054	14.604	2.53861	4.5866	6.61913	12.033	4.58145	1.41847	0.0528111	1	Gm9755	8	67514235	67515590	-	1356	processed_pseudogene	predicted pseudogene 9755 [Source:MGI Symbol;Acc:MGI:3642279] && sp|Q8BFR5|EFTU_MOUSE Elongation factor Tu, mitochondrial OS=Mus musculus OX=10090 GN=Tufm PE=1 SV=1 && PF03143:Elongation factor Tu C-terminal domain|PF03144:Elongation factor Tu domain 2|PF00009:Elongation factor Tu GTP binding domain	-
novel.229	3.19475	1.00703	6.25886	5.92342	8.25588	20.9606	3.48688	11.7133	-1.73935	0.0529172	0.34878	-	8	72233393	72238647	-	826	-	- && sp|P11227|POL_MLVRD Gag-Pol polyprotein OS=Radiation murine leukemia virus OX=11787 GN=pol PE=3 SV=2 && -	-
ENSMUSG00000074482	31.9475	64.4499	56.3297	27.9247	18.3464	38.6116	50.909	28.2942	0.855129	0.0529428	0.34878	Gm16589	8	4087658	4088575	+	918	processed_pseudogene	predicted gene 16589 [Source:MGI Symbol;Acc:MGI:4418561] && sp|Q8C4Q6|AIDA_MOUSE Axin interactor, dorsalization-associated protein OS=Mus musculus OX=10090 GN=Aida PE=1 SV=1 && PF08910:Aida N-terminus|PF14186:Cytoskeletal adhesion	-
ENSMUSG00000058794	6.38949	6.04218	9.38829	10.1544	15.5944	24.2701	7.27332	16.673	-1.18575	0.053081	1	Nfe2	15	103248212	103258403	-	2988	protein_coding	nuclear factor, erythroid derived 2 [Source:MGI Symbol;Acc:MGI:97308] && sp|Q07279|NFE2_MOUSE Transcription factor NF-E2 45 kDa subunit OS=Mus musculus OX=10090 GN=Nfe2 PE=1 SV=1 && PF03131:bZIP Maf transcription factor	-
ENSMUSG00000105858	3.19475	3.02109	3.12943	0	0.91732	0	3.11509	0.305773	3.19457	0.0531003	0.349597	2310074N15Rik	5	24447908	24448489	+	582	lincRNA	RIKEN cDNA 2310074N15 gene [Source:MGI Symbol;Acc:MGI:1922838] && - && -	-
ENSMUSG00000111564	3.19475	3.02109	3.12943	0.846203	0	0	3.11509	0.282068	3.19457	0.0531346	0.349601	Stmn1-rs1	9	115281520	115281981	-	462	processed_pseudogene	stathmin 1, related sequence 1 [Source:MGI Symbol;Acc:MGI:96740] && - && -	-
ENSMUSG00000089812	1.06492	0	0	3.38481	6.42124	1.10319	0.354972	3.63641	-3.29938	0.0531547	1	Gm15867	1	192854923	192856246	+	388	antisense	predicted gene 15867 [Source:MGI Symbol;Acc:MGI:3801862] && - && -	-
ENSMUSG00000070692	31.9475	29.2039	19.8197	49.0798	67.8817	28.6829	26.9903	48.5481	-0.851854	0.0532639	0.350204	Rps12-ps10	2	122219993	122220391	+	399	processed_pseudogene	ribosomal protein S12, pseudogene 10 [Source:MGI Symbol;Acc:MGI:3649508] && sp|Q76I81|RS12_BOVIN 40S ribosomal protein S12 OS=Bos taurus OX=9913 GN=RPS12 PE=2 SV=1 && PF01248:Ribosomal protein L7Ae/L30e/S12e/Gadd45 family	-
ENSMUSG00000112876	8.51932	5.03515	2.08629	0.846203	1.83464	0	5.21359	0.893614	2.49594	0.0533099	0.350204	Gm32443	12	31082581	31090561	-	1250	lincRNA	predicted gene, 32443 [Source:MGI Symbol;Acc:MGI:5591602] && - && -	-
ENSMUSG00000087047	0	1.00703	0	1.69241	1.83464	7.72232	0.335677	3.74979	-3.3152	0.0533199	1	1700110K17Rik	9	40323426	40343564	+	1028	antisense	RIKEN cDNA 1700110K17 gene [Source:MGI Symbol;Acc:MGI:1920808] && sp|Q3KR37|ASTRB_HUMAN Protein Aster-B OS=Homo sapiens OX=9606 GN=GRAMD1B PE=1 SV=1 && -	-
ENSMUSG00000112758	8.51932	8.05624	1.04314	0	1.83464	1.10319	5.8729	0.979276	2.60975	0.053327	0.350204	Gm36172	10	24927619	24930059	+	723	bidirectional_promoter_lncRNA	predicted gene, 36172 [Source:MGI Symbol;Acc:MGI:5595331] && - && -	-
ENSMUSG00000069986	1.06492	3.02109	0	6.76962	7.33856	4.41275	1.362	6.17365	-2.17382	0.0533801	0.350246	Gm8054	8	78869386	78869868	-	483	processed_pseudogene	predicted pseudogene 8054 [Source:MGI Symbol;Acc:MGI:3643693] && sp|P46778|RL21_HUMAN 60S ribosomal protein L21 OS=Homo sapiens OX=9606 GN=RPL21 PE=1 SV=2 && PF01157:Ribosomal protein L21e	-
ENSMUSG00000074215	9.58424	7.04921	23.9923	6.76962	3.66928	4.41275	13.5419	4.95055	1.44242	0.0534189	0.350246	Gm10643	8	84063561	84065137	-	1577	protein_coding	predicted gene 10643 [Source:MGI Symbol;Acc:MGI:3642507] && - && -	-
ENSMUSG00000105283	29.8176	24.1687	41.7257	43.1563	43.1141	82.7391	31.904	56.3365	-0.814942	0.0534342	0.350246	Gm33370	5	96910341	96922175	-	489	lincRNA	predicted gene, 33370 [Source:MGI Symbol;Acc:MGI:5592529] && - && -	-
ENSMUSG00000067161	15.9737	19.1336	1.04314	33.0019	41.2794	23.167	12.0501	32.4828	-1.43128	0.0535199	0.350532	Gm5560	5	97264828	97265719	+	892	processed_pseudogene	predicted pseudogene 5560 [Source:MGI Symbol;Acc:MGI:3647980] && sp|P51881|ADT2_MOUSE ADP/ATP translocase 2 OS=Mus musculus OX=10090 GN=Slc25a5 PE=1 SV=3 && PF00153:Mitochondrial carrier protein	-
ENSMUSG00000046341	167.192	142.998	99.0986	106.622	92.6494	47.4371	136.43	82.236	0.725559	0.0535452	0.350532	Gm11223	4	69925630	69926079	-	450	processed_pseudogene	predicted gene 11223 [Source:MGI Symbol;Acc:MGI:3651631] && sp|P13668|STMN1_RAT Stathmin OS=Rattus norvegicus OX=10116 GN=Stmn1 PE=1 SV=2 && PF00836:Stathmin family	-
ENSMUSG00000116358	79.8687	54.3796	30.2512	41.4639	25.685	13.2383	54.8331	26.7957	1.02329	0.0536162	0.350777	Gm49450	15	98932137	98953551	-	899	protein_coding	predicted gene, 49450 [Source:MGI Symbol;Acc:MGI:6155101] && sp|P81947|TBA1B_BOVIN Tubulin alpha-1B chain OS=Bos taurus OX=9913 PE=1 SV=2 && PF00091:Tubulin/FtsZ family, GTPase domain	-
ENSMUSG00000031144	11.7141	9.06327	25.0354	16.0779	22.0157	80.5327	15.2709	39.5421	-1.3663	0.0536525	1	Syp	X	7638471	7653256	+	5211	protein_coding	synaptophysin [Source:MGI Symbol;Acc:MGI:98467] && sp|Q62277|SYPH_MOUSE Synaptophysin OS=Mus musculus OX=10090 GN=Syp PE=1 SV=2 && PF01284:Membrane-associating domain	-
ENSMUSG00000114321	3.19475	1.00703	3.12943	12.693	7.33856	4.41275	2.44374	8.14812	-1.75666	0.0536567	0.350782	Gm8971	14	57363385	57363733	+	349	processed_pseudogene	predicted gene 8971 [Source:MGI Symbol;Acc:MGI:3648536] && sp|P62869|ELOB_MOUSE Elongin-B OS=Mus musculus OX=10090 GN=Elob PE=1 SV=1 && -	-
ENSMUSG00000113521	0	0	0	2.53861	1.83464	3.30956	0	2.56094	-3.74124	0.0536842	0.350782	Gm29787	13	51205263	51206111	-	849	processed_pseudogene	predicted gene, 29787 [Source:MGI Symbol;Acc:MGI:5588946] && sp|Q60598|SRC8_MOUSE Src substrate cortactin OS=Mus musculus OX=10090 GN=Cttn PE=1 SV=2 && -	-
ENSMUSG00000082383	4.25966	5.03515	0	7.61582	13.7598	9.92869	3.09827	10.4348	-1.74828	0.0537239	1	Gm9670	X	103506812	103507589	+	540	processed_pseudogene	predicted gene 9670 [Source:MGI Symbol;Acc:MGI:3780078] && sp|P47963|RL13_MOUSE 60S ribosomal protein L13 OS=Mus musculus OX=10090 GN=Rpl13 PE=1 SV=3 && PF01294:Ribosomal protein L13e	-
ENSMUSG00000089015	7.45441	2.01406	7.302	1.69241	0.91732	1.10319	5.59016	1.23764	2.15882	0.0537953	0.351287	Gm24996	2	75686740	75686838	-	99	snRNA	predicted gene, 24996 [Source:MGI Symbol;Acc:MGI:5454773] && - && -	-
ENSMUSG00000116639	12.779	14.0984	9.38829	7.61582	3.66928	3.30956	12.0886	4.86489	1.29218	0.0539073	1	AC129574.2	16	35866179	35867951	-	1773	TEC	TEC && sp|Q2EMV9|PAR14_MOUSE Protein mono-ADP-ribosyltransferase PARP14 OS=Mus musculus OX=10090 GN=Parp14 PE=1 SV=3 && -	-
ENSMUSG00000074357	5.32458	5.03515	4.17257	10.1544	8.25588	17.651	4.8441	12.0204	-1.29958	0.0540216	0.352544	AA386476	8	47675391	47685239	+	2407	bidirectional_promoter_lncRNA	expressed sequence AA386476 [Source:MGI Symbol;Acc:MGI:3034595] && - && -	-
ENSMUSG00000112593	2.12983	3.02109	2.08629	0	0	0	2.4124	0	3.78862	0.0541157	1	Gm48882	10	95318247	95324358	+	1056	antisense	predicted gene, 48882 [Source:MGI Symbol;Acc:MGI:6098637] && - && -	-
ENSMUSG00000040009	6.38949	4.02812	7.302	1.69241	0.91732	2.20638	5.90654	1.60537	1.89518	0.0542051	0.352917	Gnaz	10	74967177	75016907	+	3612	protein_coding	guanine nucleotide binding protein, alpha z subunit [Source:MGI Symbol;Acc:MGI:95780] && sp|O70443|GNAZ_MOUSE Guanine nucleotide-binding protein G(z) subunit alpha OS=Mus musculus OX=10090 GN=Gnaz PE=1 SV=4 && -	-
ENSMUSG00000103983	33.0124	32.2249	18.7766	36.3867	50.4526	52.953	28.0046	46.5975	-0.730799	0.0542092	0.352917	Gm20045	1	171320601	171326177	-	5577	lincRNA	predicted gene, 20045 [Source:MGI Symbol;Acc:MGI:5012230] && - && -	-
ENSMUSG00000106103	0	0	1.04314	2.53861	2.75196	4.41275	0.347714	3.23444	-3.11196	0.0542105	0.352917	Gm43081	5	108311370	108312749	-	1380	TEC	predicted gene 43081 [Source:MGI Symbol;Acc:MGI:5663218] && - && -	-
ENSMUSG00000073144	7.45441	14.0984	7.302	12.693	16.5118	37.5084	9.61827	22.2377	-1.19503	0.0542196	0.352917	4930599N23Rik	6	39118473	39148312	+	880	antisense	RIKEN cDNA 4930599N23 gene [Source:MGI Symbol;Acc:MGI:1922629] && sp|Q3UWM4|KDM7A_MOUSE Lysine-specific demethylase 7A OS=Mus musculus OX=10090 GN=Kdm7a PE=2 SV=2 && -	-
ENSMUSG00000074553	26.6229	10.0703	15.6471	38.9253	33.9409	25.3733	17.4468	32.7465	-0.916193	0.0543094	0.352917	Eif1-ps1	14	40006220	40006549	+	330	processed_pseudogene	eukaryotic translation initiation factor 1, pseudogene 1 [Source:MGI Symbol;Acc:MGI:3642383] && sp|P48024|EIF1_MOUSE Eukaryotic translation initiation factor 1 OS=Mus musculus OX=10090 GN=Eif1 PE=1 SV=2 && PF01253:Translation initiation factor SUI1	-
ENSMUSG00000046463	4.25966	6.04218	6.25886	2.53861	0.91732	0	5.52023	1.15198	2.18952	0.0543384	0.352917	5930403N24Rik	10	37139402	37151315	+	4924	processed_transcript	RIKEN cDNA 5930403N24 gene [Source:MGI Symbol;Acc:MGI:2444171] && - && -	-
ENSMUSG00000057322	1369.48	1619.3	1331.05	1929.34	1977.74	1598.52	1439.95	1835.2	-0.35011	0.0543602	0.352917	Rpl38	11	114668524	114672331	+	542	protein_coding	ribosomal protein L38 [Source:MGI Symbol;Acc:MGI:1914921] && sp|Q9JJI8|RL38_MOUSE 60S ribosomal protein L38 OS=Mus musculus OX=10090 GN=Rpl38 PE=1 SV=3 && -	-
ENSMUSG00000089513	2.12983	1.00703	0	8.46203	1.83464	6.61913	1.04562	5.6386	-2.43736	0.0543781	0.352917	Gm24875	2	25031350	25031453	-	104	snRNA	predicted gene, 24875 [Source:MGI Symbol;Acc:MGI:5454652] && - && -	-
ENSMUSG00000114617	0	1.00703	0	4.23101	0.91732	5.51594	0.335677	3.55476	-3.24957	0.0544515	0.352917	Gm48766	13	36252359	36256920	+	4562	TEC	predicted gene, 48766 [Source:MGI Symbol;Acc:MGI:6098453] && - && -	-
ENSMUSG00000078921	34.0773	40.2812	61.5455	28.7709	23.8503	29.7861	45.3013	27.4691	0.723427	0.0544867	0.352917	Tgtp2	11	49057194	49064206	-	2938	protein_coding	T cell specific GTPase 2 [Source:MGI Symbol;Acc:MGI:3710083] && sp|Q62293|TGTP1_MOUSE T-cell-specific guanine nucleotide triphosphate-binding protein 1 OS=Mus musculus OX=10090 GN=Tgtp1 PE=1 SV=1 && PF05049:Interferon-inducible GTPase (IIGP)	-
ENSMUSG00000049916	109.686	108.759	83.4515	151.47	120.169	145.621	100.632	139.087	-0.466657	0.0545001	0.352917	2610318N02Rik	16	17113398	17125167	-	2277	protein_coding	RIKEN cDNA 2610318N02 gene [Source:MGI Symbol;Acc:MGI:1917708] && - && -	-
ENSMUSG00000097285	1.06492	0	0	2.53861	3.66928	3.30956	0.354972	3.17248	-3.09019	0.0545611	0.352917	Gm26683	1	91297203	91304405	-	470	lincRNA	predicted gene, 26683 [Source:MGI Symbol;Acc:MGI:5477177] && - && -	-
ENSMUSG00000062461	5.32458	15.1054	13.5609	19.4627	28.4369	20.9606	11.3303	22.9534	-1.01529	0.0546153	1	Gm5453	13	98904224	98904670	+	447	processed_pseudogene	predicted gene 5453 [Source:MGI Symbol;Acc:MGI:3648523] && sp|P14115|RL27A_MOUSE 60S ribosomal protein L27a OS=Mus musculus OX=10090 GN=Rpl27a PE=1 SV=5 && PF00828:Ribosomal proteins 50S-L15, 50S-L18e, 60S-L27A	-
ENSMUSG00000094737	0	0	1.04314	2.53861	3.66928	3.30956	0.347714	3.17248	-3.09019	0.054626	0.352917	Gm17045	14	6034967	6035810	+	844	processed_pseudogene	predicted gene 17045 [Source:MGI Symbol;Acc:MGI:4937872] && sp|Q9R0P3|ESTD_MOUSE S-formylglutathione hydrolase OS=Mus musculus OX=10090 GN=Esd PE=1 SV=1 && PF00756:Putative esterase	-
ENSMUSG00000106194	1.06492	5.03515	7.302	0	0.91732	1.10319	4.46736	0.673503	2.78884	0.0546799	0.352917	Gm43569	3	122565050	122574740	+	559	antisense	predicted gene 43569 [Source:MGI Symbol;Acc:MGI:5663706] && - && -	-
ENSMUSG00000048200	9.58424	13.0914	6.25886	5.92342	0.91732	2.20638	9.64483	3.01571	1.65374	0.0546809	0.352917	Cracr2b	7	141461094	141466613	+	2764	protein_coding	calcium release activated channel regulator 2B [Source:MGI Symbol;Acc:MGI:2446129] && sp|Q80ZJ8|EFC4A_MOUSE EF-hand calcium-binding domain-containing protein 4A OS=Mus musculus OX=10090 GN=Cracr2b PE=2 SV=2 && -	-
ENSMUSG00000091109	1.06492	1.00703	0	3.38481	4.5866	4.41275	0.690648	4.12806	-2.57465	0.0546827	0.352917	Gm17622	13	96490733	96491120	+	45	protein_coding	predicted gene, 17622 [Source:MGI Symbol;Acc:MGI:4937256] && - && -	-
ENSMUSG00000115771	2.12983	3.02109	1.04314	4.23101	6.42124	11.0319	2.06469	7.22805	-1.78925	0.0547122	0.352917	Gm49312	15	38079102	38079563	+	462	bidirectional_promoter_lncRNA	predicted gene, 49312 [Source:MGI Symbol;Acc:MGI:6118817] && - && -	-
ENSMUSG00000072407	9.58424	4.02812	7.302	16.9241	13.7598	14.3414	6.97145	15.0084	-1.11319	0.0547905	0.352917	Gm6419	10	74862988	74863416	-	429	processed_pseudogene	predicted gene 6419 [Source:MGI Symbol;Acc:MGI:3647564] && sp|Q9CPV3|RM42_MOUSE 39S ribosomal protein L42, mitochondrial OS=Mus musculus OX=10090 GN=Mrpl42 PE=1 SV=1 && PF10210:Mitochondrial 28S ribosomal protein S32	-
ENSMUSG00000068466	366.331	424.966	428.732	333.404	337.574	231.67	406.676	300.882	0.433024	0.0548243	0.352917	Gm5518	19	29160118	29160765	+	648	processed_pseudogene	predicted gene 5518 [Source:MGI Symbol;Acc:MGI:3648673] && sp|P63158|HMGB1_MOUSE High mobility group protein B1 OS=Mus musculus OX=10090 GN=Hmgb1 PE=1 SV=2 && PF09011:HMG-box domain|PF00505:HMG (high mobility group) box	-
ENSMUSG00000117333	18.1036	18.1265	35.4669	11.8468	11.0078	14.3414	23.899	12.3987	0.951593	0.0548307	0.352917	AC154486.3	17	22777217	22807736	-	1533	processed_pseudogene	C2H2 zinc finger protein pseudogene && - && PF00096:Zinc finger, C2H2 type|PF01352:KRAB box	-
ENSMUSG00000099779	6.38949	4.02812	10.4314	25.3861	13.7598	9.92869	6.94968	16.3582	-1.24699	0.0548449	0.352917	Gm8228	9	84973053	84976515	-	2192	processed_pseudogene	predicted gene 8228 [Source:MGI Symbol;Acc:MGI:3646986] && sp|Q99MJ9|DDX50_MOUSE ATP-dependent RNA helicase DDX50 OS=Mus musculus OX=10090 GN=Ddx50 PE=2 SV=1 && -	-
ENSMUSG00000105944	17.0386	10.0703	6.25886	25.3861	35.7755	12.1351	11.1226	24.4322	-1.14352	0.0548581	0.352917	Gm5075	3	107868022	107868643	-	622	processed_pseudogene	predicted gene 5075 [Source:MGI Symbol;Acc:MGI:3645483] && sp|P47963|RL13_MOUSE 60S ribosomal protein L13 OS=Mus musculus OX=10090 GN=Rpl13 PE=1 SV=3 && PF01294:Ribosomal protein L13e	-
ENSMUSG00000051243	15.9737	9.06327	0	1.69241	1.83464	0	8.34567	1.17568	2.78968	0.054865	0.352917	Islr2	9	58196297	58204319	-	5921	protein_coding	immunoglobulin superfamily containing leucine-rich repeat 2 [Source:MGI Symbol;Acc:MGI:2444277] && sp|Q5RKR3|ISLR2_MOUSE Immunoglobulin superfamily containing leucine-rich repeat protein 2 OS=Mus musculus OX=10090 GN=Islr2 PE=1 SV=1 && PF13855:Leucine rich repeat	-
ENSMUSG00000026452	5.32458	3.02109	6.25886	0	1.83464	1.10319	4.86818	0.979276	2.34103	0.0549023	0.352917	Syt2	1	134646677	134762593	+	7638	protein_coding	synaptotagmin II [Source:MGI Symbol;Acc:MGI:99666] && sp|P46097|SYT2_MOUSE Synaptotagmin-2 OS=Mus musculus OX=10090 GN=Syt2 PE=1 SV=1 && PF00168:C2 domain	-
ENSMUSG00000085663	0	0	1.04314	2.53861	1.83464	5.51594	0.347714	3.2964	-3.13454	0.0549492	1	Gm15718	7	132979582	132983552	-	311	antisense	predicted gene 15718 [Source:MGI Symbol;Acc:MGI:3783160] && - && -	-
ENSMUSG00000103049	0	1.00703	0	3.38481	1.83464	4.41275	0.335677	3.21073	-3.10344	0.0549574	0.352917	Gm37311	16	77616311	77618334	+	2024	TEC	predicted gene, 37311 [Source:MGI Symbol;Acc:MGI:5610539] && - && -	-
ENSMUSG00000092021	3.19475	1.00703	14.604	0	1.83464	1.10319	6.26859	0.979276	2.69976	0.0549576	1	Gbp11	5	105323042	105346472	-	2692	polymorphic_pseudogene	guanylate binding protein 11 [Source:MGI Symbol;Acc:MGI:3646307] && sp|Q6ZN66|GBP6_HUMAN Guanylate-binding protein 6 OS=Homo sapiens OX=9606 GN=GBP6 PE=2 SV=1 && -	-
ENSMUSG00000085423	0	0	0	0.846203	2.75196	4.41275	0	2.67031	-3.79444	0.0549591	0.352917	4930594M22Rik	14	122952119	122956343	+	514	antisense	RIKEN cDNA 4930594M22 gene [Source:MGI Symbol;Acc:MGI:1925478] && - && -	-
ENSMUSG00000061983	4761.24	5197.28	4537.67	5595.94	7014.75	5608.61	4832.06	6073.1	-0.329808	0.0549819	1	Rps12	10	23785183	23787275	-	2027	protein_coding	ribosomal protein S12 [Source:MGI Symbol;Acc:MGI:98105] && sp|Q76I81|RS12_BOVIN 40S ribosomal protein S12 OS=Bos taurus OX=9913 GN=RPS12 PE=2 SV=1 && -	-
ENSMUSG00000098540	1.06492	2.01406	0	2.53861	6.42124	6.61913	1.02632	5.19299	-2.32102	0.055109	0.353382	Mir7059	7	126579474	126579532	-	59	miRNA	microRNA 7059 [Source:MGI Symbol;Acc:MGI:5530916] && - && -	-
ENSMUSG00000091784	28.7527	28.1968	16.6903	16.9241	8.25588	13.2383	24.5466	12.8061	0.935978	0.05513	0.353382	Gm17022	8	13086509	13087430	+	922	processed_pseudogene	predicted gene 17022 [Source:MGI Symbol;Acc:MGI:4937849] && sp|Q5MJ86|G3P2_DANRE Glyceraldehyde-3-phosphate dehydrogenase 2 OS=Danio rerio OX=7955 GN=gapdh-2 PE=2 SV=1 && -	-
ENSMUSG00000081540	0	0	1.04314	1.69241	4.5866	3.30956	0.347714	3.19619	-3.09929	0.0551956	0.353382	Gm12538	4	57413711	57414196	-	486	processed_pseudogene	predicted gene 12538 [Source:MGI Symbol;Acc:MGI:3650715] && sp|Q9CPZ6|ORML3_MOUSE ORM1-like protein 3 OS=Mus musculus OX=10090 GN=Ormdl3 PE=2 SV=1 && PF04061:ORMDL family	-
ENSMUSG00000093858	0	0	0	2.53861	0.91732	4.41275	0	2.62289	-3.77128	0.0552081	0.353382	Gm19967	11	70864660	70872754	+	2138	sense_intronic	predicted gene, 19967 [Source:MGI Symbol;Acc:MGI:5012152] && - && -	-
ENSMUSG00000037260	1112.84	1124.85	1290.37	891.051	1031.99	931.091	1176.02	951.376	0.30583	0.055235	0.353382	Hgsnat	8	25944453	25976753	-	3305	protein_coding	heparan-alpha-glucosaminide N-acetyltransferase [Source:MGI Symbol;Acc:MGI:1196297] && sp|Q3UDW8|HGNAT_MOUSE Heparan-alpha-glucosaminide N-acetyltransferase OS=Mus musculus OX=10090 GN=Hgsnat PE=1 SV=2 && -	-
ENSMUSG00000107524	2.12983	5.03515	2.08629	5.92342	7.33856	14.3414	3.08376	9.20114	-1.55692	0.055235	0.353382	Gm44136	3	40863948	40865053	-	1106	TEC	predicted gene, 44136 [Source:MGI Symbol;Acc:MGI:5690528] && - && -	-
ENSMUSG00000011263	2.12983	6.04218	4.17257	7.61582	8.25588	17.651	4.11486	11.1742	-1.42256	0.0552691	0.353383	Exoc3l2	7	19463331	19496762	+	4016	protein_coding	exocyst complex component 3-like 2 [Source:MGI Symbol;Acc:MGI:1921713] && sp|Q2M3D2|EX3L2_HUMAN Exocyst complex component 3-like protein 2 OS=Homo sapiens OX=9606 GN=EXOC3L2 PE=1 SV=1 && PF06046:Exocyst complex component Sec6	-
ENSMUSG00000054181	0	0	0	0.846203	3.66928	3.30956	0	2.60835	-3.7652	0.0553206	1	A930012O16Rik	2	57236227	57238508	-	1541	processed_transcript	RIKEN cDNA A930012O16 gene [Source:MGI Symbol;Acc:MGI:2442255] && - && -	-
novel.55	73.4792	69.485	19.8197	23.6937	33.9409	25.3733	54.2613	27.6693	0.971396	0.0553515	0.353565	-	13	21812198	21820185	-	1257	-	- && - && -	-
ENSMUSG00000086629	22.3632	16.1125	12.5177	31.3095	22.0157	37.5084	16.9978	30.2779	-0.830105	0.0554065	0.353565	2810403D21Rik	X	108833800	108974906	+	8345	processed_transcript	RIKEN cDNA 2810403D21 gene [Source:MGI Symbol;Acc:MGI:1917214] && - && -	-
ENSMUSG00000112379	0	0	0	0.846203	1.83464	5.51594	0	2.73226	-3.82397	0.0554213	0.353565	Gm47900	10	66837597	66839501	+	1603	lincRNA	predicted gene, 47900 [Source:MGI Symbol;Acc:MGI:6097137] && - && -	-
ENSMUSG00000069581	4.25966	1.00703	4.17257	0	0.91732	0	3.14642	0.305773	3.20635	0.0554333	0.353565	Tspear	10	77686569	77887021	+	2933	protein_coding	thrombospondin type laminin G domain and EAR repeats [Source:MGI Symbol;Acc:MGI:2671932] && sp|J3S6Y1|TSEAR_MOUSE Thrombospondin-type laminin G domain and EAR repeat-containing protein OS=Mus musculus OX=10090 GN=Tspear PE=1 SV=1 && PF03736:EPTP domain	-
novel.85	0	3.02109	1.04314	7.61582	3.66928	6.61913	1.35474	5.96808	-2.12311	0.0554538	1	-	17	24779768	24781333	+	454	-	- && - && -	-
ENSMUSG00000115693	4.25966	1.00703	4.17257	0.846203	0	0	3.14642	0.282068	3.20636	0.0555418	0.353915	1700085D07Rik	15	73249546	73264120	+	318	antisense	RIKEN cDNA 1700085D07 gene [Source:MGI Symbol;Acc:MGI:1920741] && - && -	-
ENSMUSG00000058756	307.761	301.102	292.08	377.406	383.44	349.711	300.314	370.186	-0.30247	0.0555455	1	Thra	11	98740638	98769006	+	4614	protein_coding	thyroid hormone receptor alpha [Source:MGI Symbol;Acc:MGI:98742] && sp|P63058|THA_MOUSE Thyroid hormone receptor alpha OS=Mus musculus OX=10090 GN=Thra PE=1 SV=2 && -	-
ENSMUSG00000027694	42.5966	70.4921	77.1926	42.3101	27.5196	47.4371	63.4271	39.0889	0.702179	0.0555561	0.353915	Gm8325	3	60877014	60877587	+	464	transcribed_processed_pseudogene	predicted pseudogene 8325 [Source:MGI Symbol;Acc:MGI:3644852] && sp|Q9CZY3|UB2V1_MOUSE Ubiquitin-conjugating enzyme E2 variant 1 OS=Mus musculus OX=10090 GN=Ube2v1 PE=1 SV=1 && PF00179:Ubiquitin-conjugating enzyme	-
ENSMUSG00000067916	59.6353	50.3515	57.3729	40.6177	42.1967	19.8574	55.7865	34.224	0.694702	0.0556477	0.354066	Zfp991	4	147132038	147180579	+	2917	protein_coding	zinc finger protein 991 [Source:MGI Symbol;Acc:MGI:3701604] && sp|E9PW05|ZFP54_MOUSE Zinc finger protein 54 OS=Mus musculus OX=10090 GN=Zfp54 PE=2 SV=1 && PF01352:KRAB box	-
ENSMUSG00000079410	5.32458	9.06327	6.25886	3.38481	1.83464	1.10319	6.88223	2.10755	1.67599	0.055679	0.354066	Gm2897	14	3049285	3076840	+	1980	protein_coding	predicted gene 2897 [Source:MGI Symbol;Acc:MGI:3781075] && - && PF04822:Takusan	-
ENSMUSG00000101523	282.203	451.149	406.826	277.554	308.22	237.185	380.059	274.32	0.469843	0.0556816	0.354066	Gm10031	1	156524012	156526664	+	2653	protein_coding	predicted pseudogene 10031 [Source:MGI Symbol;Acc:MGI:3704198] && sp|Q60737|CSK21_MOUSE Casein kinase II subunit alpha OS=Mus musculus OX=10090 GN=Csnk2a1 PE=1 SV=2 && -	-
ENSMUSG00000091623	21.2983	20.1406	26.0786	11.8468	15.5944	9.92869	22.5058	12.4567	0.846745	0.0557186	0.354085	Gm17092	5	99977686	99978858	+	698	antisense	predicted gene 17092 [Source:MGI Symbol;Acc:MGI:4937919] && - && -	-
ENSMUSG00000062859	0	1.00703	1.04314	1.69241	3.66928	7.72232	0.683391	4.36133	-2.64453	0.0557274	1	Tcp11	17	28066745	28080639	-	3841	protein_coding	t-complex protein 11 [Source:MGI Symbol;Acc:MGI:98544] && sp|Q01755|TCP11_MOUSE T-complex protein 11 OS=Mus musculus OX=10090 GN=Tcp11 PE=1 SV=1 && PF05794:T-complex protein 11	-
ENSMUSG00000102722	0	1.00703	0	4.23101	2.75196	2.20638	0.335677	3.06312	-3.05	0.0557701	1	Gm37935	1	134454492	134455473	-	982	TEC	predicted gene, 37935 [Source:MGI Symbol;Acc:MGI:5611163] && - && -	-
ENSMUSG00000095530	2.12983	1.00703	4.17257	0	0	0	2.43648	0	3.80079	0.0558143	0.35443	Snora19	19	60774330	60774461	-	132	snoRNA	small nucleolar RNA, H/ACA box 19 [Source:MGI Symbol;Acc:MGI:3819491] && - && -	-
ENSMUSG00000082516	1.06492	2.01406	4.17257	0	0	0	2.41718	0	3.791	0.055841	0.35443	Gm13342	2	22410525	22410731	-	207	processed_pseudogene	predicted gene 13342 [Source:MGI Symbol;Acc:MGI:3650441] && sp|P63217|GBG5_BOVIN Guanine nucleotide-binding protein G(I)/G(S)/G(O) subunit gamma-5 OS=Bos taurus OX=9913 GN=GNG5 PE=1 SV=1 && -	-
ENSMUSG00000060487	1.06492	3.02109	5.21572	0	0.91732	0	3.10057	0.305773	3.18916	0.0558667	1	Samd5	10	9622936	9675208	-	6922	protein_coding	sterile alpha motif domain containing 5 [Source:MGI Symbol;Acc:MGI:2444815] && sp|Q3V1H9|SAMD5_MOUSE Sterile alpha motif domain-containing protein 5 OS=Mus musculus OX=10090 GN=Samd5 PE=1 SV=1 && -	-
ENSMUSG00000021918	265.164	247.729	254.527	345.251	286.204	336.472	255.807	322.642	-0.334858	0.0558724	1	Nek4	14	30951377	30988821	+	8912	protein_coding	NIMA (never in mitosis gene a)-related expressed kinase 4 [Source:MGI Symbol;Acc:MGI:1344404] && sp|Q9Z1J2|NEK4_MOUSE Serine/threonine-protein kinase Nek4 OS=Mus musculus OX=10090 GN=Nek4 PE=1 SV=1 && -	-
ENSMUSG00000020062	2.12983	7.04921	4.17257	0.846203	0.91732	1.10319	4.45054	0.95557	2.23422	0.0559741	0.354859	Slc5a8	10	88885992	88929515	+	5331	protein_coding	solute carrier family 5 (iodide transporter), member 8 [Source:MGI Symbol;Acc:MGI:2384916] && sp|Q8BYF6|SC5A8_MOUSE Sodium-coupled monocarboxylate transporter 1 OS=Mus musculus OX=10090 GN=Slc5a8 PE=1 SV=1 && -	-
ENSMUSG00000053916	26.6229	2.01406	3.12943	1.69241	0	4.41275	10.5888	2.03505	2.40937	0.0559923	0.354859	Nanp	2	151029685	151039398	-	1488	protein_coding	N-acetylneuraminic acid phosphatase [Source:MGI Symbol;Acc:MGI:1914561] && sp|Q9CPT3|NANP_MOUSE N-acylneuraminate-9-phosphatase OS=Mus musculus OX=10090 GN=Nanp PE=1 SV=1 && PF13419:Haloacid dehalogenase-like hydrolase	-
ENSMUSG00000084807	53.2458	52.3655	88.6672	41.4639	44.0314	40.818	64.7595	42.1044	0.620391	0.0560376	1	Gm13073	4	149780024	149780714	-	486	lincRNA	predicted gene 13073 [Source:MGI Symbol;Acc:MGI:3651721] && - && -	-
ENSMUSG00000078636	192.75	158.104	167.946	142.162	107.326	137.899	172.933	129.129	0.42146	0.0560627	0.354859	Gm7336	7	51746647	51747878	+	1232	processed_pseudogene	predicted gene 7336 [Source:MGI Symbol;Acc:MGI:3644851] && sp|P16858|G3P_MOUSE Glyceraldehyde-3-phosphate dehydrogenase OS=Mus musculus OX=10090 GN=Gapdh PE=1 SV=2 && PF02800:Glyceraldehyde 3-phosphate dehydrogenase, C-terminal domain|PF00044:Glyceraldehyde 3-phosphate dehydrogenase, NAD binding domain	-
ENSMUSG00000104388	1.06492	0	2.08629	3.38481	2.75196	9.92869	1.0504	5.35516	-2.34293	0.0561004	0.354859	Gm37033	1	180357649	180364998	+	7350	TEC	predicted gene, 37033 [Source:MGI Symbol;Acc:MGI:5610261] && - && -	-
ENSMUSG00000052920	0	1.00703	0	5.92342	2.75196	1.10319	0.335677	3.25952	-3.14677	0.056112	0.354859	Prkg1	19	30567551	31765033	-	7799	protein_coding	protein kinase, cGMP-dependent, type I [Source:MGI Symbol;Acc:MGI:108174] && sp|P0C605|KGP1_MOUSE cGMP-dependent protein kinase 1 OS=Mus musculus OX=10090 GN=Prkg1 PE=1 SV=1 && PF00069:Protein kinase domain|PF00027:Cyclic nucleotide-binding domain|PF16808:Coiled-coil N-terminus of cGMP-dependent protein kinase	-
ENSMUSG00000069310	6.38949	10.0703	4.17257	1.69241	2.75196	2.20638	6.87745	2.21691	1.64008	0.0561129	0.354859	Hist1h3c	13	23744973	23745602	-	630	protein_coding	histone cluster 1, H3c [Source:MGI Symbol;Acc:MGI:2448320] && sp|P84227|H32_BOVIN Histone H3.2 OS=Bos taurus OX=9913 PE=1 SV=2 && PF00125:Core histone H2A/H2B/H3/H4	-
ENSMUSG00000099061	6.38949	4.02812	2.08629	1.69241	0	0	4.16797	0.564135	2.79019	0.0561528	0.354896	Gm28050	5	106500894	106574718	-	984	lincRNA	predicted gene, 28050 [Source:MGI Symbol;Acc:MGI:5547786] && - && -	-
ENSMUSG00000034739	12.779	12.0844	9.38829	21.1551	32.1062	13.2383	11.4172	22.1665	-0.964109	0.0561576	1	Mfrp	9	44101729	44109187	+	4334	protein_coding	membrane frizzled-related protein [Source:MGI Symbol;Acc:MGI:2385957] && sp|Q8K480|MFRP_MOUSE Membrane frizzled-related protein OS=Mus musculus OX=10090 GN=Mfrp PE=1 SV=1 && -	-
ENSMUSG00000080972	1.06492	1.00703	3.12943	4.23101	6.42124	7.72232	1.73379	6.12486	-1.81394	0.0562578	0.355345	Gm16061	5	135698163	135699019	-	857	processed_pseudogene	predicted gene 16061 [Source:MGI Symbol;Acc:MGI:3801920] && sp|Q90YS3|RS2_ICTPU 40S ribosomal protein S2 OS=Ictalurus punctatus OX=7998 GN=rps2 PE=2 SV=1 && -	-
ENSMUSG00000074516	21.2983	35.246	16.6903	60.0804	38.5275	30.8893	24.4115	43.1657	-0.825643	0.0563101	1	Gm10709	9	7751725	7752204	+	480	processed_pseudogene	predicted gene 10709 [Source:MGI Symbol;Acc:MGI:3642754] && sp|P47915|RL29_MOUSE 60S ribosomal protein L29 OS=Mus musculus OX=10090 GN=Rpl29 PE=1 SV=2 && PF01779:Ribosomal L29e protein family	-
ENSMUSG00000063875	17.0386	17.1195	7.302	33.0019	33.0235	15.4446	13.8201	27.1567	-0.981198	0.056371	1	Rps6-ps1	15	76337616	76338362	+	747	processed_pseudogene	ribosomal protein S6, pseudogene 1 [Source:MGI Symbol;Acc:MGI:3809093] && sp|Q90YR8|RS6_ICTPU 40S ribosomal protein S6 OS=Ictalurus punctatus OX=7998 GN=rps6 PE=2 SV=1 && PF01092:Ribosomal protein S6e	-
ENSMUSG00000096296	0	2.01406	1.04314	3.38481	8.25588	3.30956	1.01907	4.98342	-2.2787	0.0563769	0.355882	Snord88c	7	44249852	44249941	+	90	snoRNA	small nucleolar RNA, C/D box 88C [Source:MGI Symbol;Acc:MGI:3819561] && - && -	-
ENSMUSG00000113017	0	0	2.08629	2.53861	1.83464	11.0319	0.695429	5.13504	-2.87269	0.0563846	1	Gm46401	13	5915793	6014285	+	1303	lincRNA	predicted gene, 46401 [Source:MGI Symbol;Acc:MGI:5826038] && - && -	-
ENSMUSG00000115243	8.51932	7.04921	2.08629	11.0006	18.3464	12.1351	5.88494	13.8274	-1.23358	0.056418	0.355925	Gm5207	14	95419786	95421363	+	1578	processed_pseudogene	predicted gene 5207 [Source:MGI Symbol;Acc:MGI:3647978] && sp|Q61753|SERA_MOUSE D-3-phosphoglycerate dehydrogenase OS=Mus musculus OX=10090 GN=Phgdh PE=1 SV=3 && -	-
ENSMUSG00000082693	9.58424	12.0844	23.9923	4.23101	7.33856	8.82551	15.2203	6.79836	1.17729	0.0565458	0.356073	Gm15190	X	159584783	159585058	-	276	processed_pseudogene	predicted gene 15190 [Source:MGI Symbol;Acc:MGI:3705630] && sp|Q3SZ68|LTOR5_BOVIN Ragulator complex protein LAMTOR5 OS=Bos taurus OX=9913 GN=LAMTOR5 PE=3 SV=1 && -	-
ENSMUSG00000104781	12.779	9.06327	8.34515	2.53861	5.50392	4.41275	10.0625	4.15176	1.28547	0.0565548	0.356073	Gm43303	5	45192669	45251929	-	669	lincRNA	predicted gene 43303 [Source:MGI Symbol;Acc:MGI:5663440] && - && -	-
ENSMUSG00000084457	1.06492	0	0	3.38481	0.91732	5.51594	0.354972	3.27269	-3.12696	0.0565682	0.356073	n-R5s73	11	98273260	98273366	-	107	rRNA	nuclear encoded rRNA 5S 73 [Source:MGI Symbol;Acc:MGI:4421918] && - && -	-
ENSMUSG00000067288	2279.98	2600.15	3189.93	3429.66	3533.52	3278.68	2690.02	3413.95	-0.343847	0.0565704	1	Rps28	17	33819027	33824562	-	1464	protein_coding	ribosomal protein S28 [Source:MGI Symbol;Acc:MGI:1859516] && sp|Q56JX6|RS28_BOVIN 40S ribosomal protein S28 OS=Bos taurus OX=9913 GN=RPS28 PE=3 SV=1 && -	-
ENSMUSG00000042569	766.739	690.822	722.898	599.111	624.695	583.587	726.82	602.464	0.2704	0.056578	0.356073	Dhrs7b	11	60830631	60860195	+	3325	protein_coding	dehydrogenase/reductase (SDR family) member 7B [Source:MGI Symbol;Acc:MGI:2384931] && sp|Q99J47|DRS7B_MOUSE Dehydrogenase/reductase SDR family member 7B OS=Mus musculus OX=10090 GN=Dhrs7b PE=1 SV=1 && -	-
ENSMUSG00000040321	400.408	382.671	360.928	329.173	310.972	278.003	381.336	306.049	0.315944	0.0566815	0.356293	Zfp770	2	114193461	114201469	-	6793	protein_coding	zinc finger protein 770 [Source:MGI Symbol;Acc:MGI:2445100] && sp|Q8BIQ8|ZN770_MOUSE Zinc finger protein 770 OS=Mus musculus OX=10090 GN=Znf770 PE=2 SV=1 && -	-
ENSMUSG00000039372	4.25966	4.02812	4.17257	0.846203	0.91732	1.10319	4.15345	0.95557	2.13105	0.0567098	0.356293	2024-03-04	1	72427112	72536930	-	4553	protein_coding	membrane-associated ring finger (C3HC4) 4 [Source:MGI Symbol;Acc:MGI:2683550] && sp|Q80TE3|MARH4_MOUSE E3 ubiquitin-protein ligase MARCHF4 OS=Mus musculus OX=10090 GN=Marchf4 PE=2 SV=3 && -	-
ENSMUSG00000025766	18.1036	11.0773	17.7334	38.9253	20.181	25.3733	15.6381	28.1599	-0.854999	0.0567156	0.356293	D3Ertd751e	3	41742611	41803320	+	5813	protein_coding	DNA segment, Chr 3, ERATO Doi 751, expressed [Source:MGI Symbol;Acc:MGI:1289213] && sp|Q8BGN2|CD033_MOUSE UPF0462 protein C4orf33 homolog OS=Mus musculus OX=10090 GN=D3Ertd751e PE=2 SV=1 && -	-
ENSMUSG00000019970	678.351	673.703	956.562	596.573	534.798	624.405	769.539	585.258	0.395107	0.0567619	0.356369	Sgk1	10	21882184	21999903	+	4903	protein_coding	serum/glucocorticoid regulated kinase 1 [Source:MGI Symbol;Acc:MGI:1340062] && sp|Q9WVC6|SGK1_MOUSE Serine/threonine-protein kinase Sgk1 OS=Mus musculus OX=10090 GN=Sgk1 PE=1 SV=1 && PF00069:Protein kinase domain|PF00433:Protein kinase C terminal domain	-
ENSMUSG00000117084	2.12983	1.00703	6.25886	0.846203	0	0	3.13191	0.282068	3.20109	0.056859	0.356764	AC154912.1	17	28446500	28456457	+	2191	antisense	novel transcript, antisense to Fkbp5 && - && -	-
ENSMUSG00000094772	1.06492	5.03515	10.4314	0	0.91732	2.20638	5.5105	1.04123	2.47156	0.0569776	1	Rpl29-ps2	13	4609334	4615025	+	1323	transcribed_processed_pseudogene	ribosomal protein L29, pseudogene 2 [Source:MGI Symbol;Acc:MGI:3648624] && sp|P47915|RL29_MOUSE 60S ribosomal protein L29 OS=Mus musculus OX=10090 GN=Rpl29 PE=1 SV=2 && PF01779:Ribosomal L29e protein family	-
ENSMUSG00000041120	28.7527	36.2531	78.2357	27.9247	20.181	30.8893	47.7472	26.3317	0.861012	0.0570704	0.357704	Nbl1	4	139082284	139092993	-	2033	protein_coding	neuroblastoma, suppression of tumorigenicity 1 [Source:MGI Symbol;Acc:MGI:104591] && sp|Q61477|NBL1_MOUSE Neuroblastoma suppressor of tumorigenicity 1 OS=Mus musculus OX=10090 GN=Nbl1 PE=1 SV=2 && PF03045:DAN domain	-
ENSMUSG00000022203	0	2.01406	0	5.07722	1.83464	6.61913	0.671353	4.51033	-2.71695	0.0570775	0.357704	Efs	14	54916535	54926126	-	2917	protein_coding	embryonal Fyn-associated substrate [Source:MGI Symbol;Acc:MGI:105311] && sp|Q64355|EFS_MOUSE Embryonal Fyn-associated substrate OS=Mus musculus OX=10090 GN=Efs PE=1 SV=2 && PF12026:Crk-Associated Substrate C-terminal domain|PF14604:Variant SH3 domain	-
ENSMUSG00000081382	21.2983	15.1054	6.25886	24.5399	31.1889	25.3733	14.2209	27.034	-0.92828	0.0571127	0.357709	Rpl18-ps1	1	60900898	60901422	+	525	processed_pseudogene	ribosomal protein L18, pseudogene 1 [Source:MGI Symbol;Acc:MGI:98018] && sp|P62717|RL18A_MOUSE 60S ribosomal protein L18a OS=Mus musculus OX=10090 GN=Rpl18a PE=1 SV=1 && PF01775:Ribosomal proteins 50S-L18Ae/60S-L20/60S-L18A	-
ENSMUSG00000084350	113.946	89.6256	102.228	72.7734	87.1454	52.953	101.933	70.9573	0.517759	0.0572009	0.357861	Znf41-ps	4	145825237	145829942	+	2413	unprocessed_pseudogene	ZNF41, pseudogene [Source:MGI Symbol;Acc:MGI:1917255] && sp|E9PW05|ZFP54_MOUSE Zinc finger protein 54 OS=Mus musculus OX=10090 GN=Zfp54 PE=2 SV=1 && -	-
ENSMUSG00000002032	6.38949	8.05624	6.25886	15.2316	10.0905	17.651	6.90153	14.3244	-1.04697	0.0572055	0.357861	Tmem25	9	44793769	44799307	-	3212	protein_coding	transmembrane protein 25 [Source:MGI Symbol;Acc:MGI:1918937] && sp|Q9DCF1|TMM25_MOUSE Transmembrane protein 25 OS=Mus musculus OX=10090 GN=Tmem25 PE=1 SV=1 && -	-
ENSMUSG00000108472	3.19475	1.00703	0	6.76962	1.83464	11.0319	1.40059	6.54538	-2.22365	0.0573137	0.357882	Gm45212	7	64284808	64288210	-	3403	TEC	predicted gene 45212 [Source:MGI Symbol;Acc:MGI:5753788] && - && -	-
ENSMUSG00000083496	44.7264	50.3515	39.6394	59.2342	62.3778	70.6041	44.9058	64.072	-0.509412	0.0573163	0.357882	Gm11263	4	79327708	79328456	+	749	processed_pseudogene	predicted gene 11263 [Source:MGI Symbol;Acc:MGI:3651899] && sp|Q5E995|RS6_BOVIN 40S ribosomal protein S6 OS=Bos taurus OX=9913 GN=RPS6 PE=2 SV=1 && PF01092:Ribosomal protein S6e	-
ENSMUSG00000098839	0	0	0	1.69241	4.5866	1.10319	0	2.46073	-3.6931	0.0573452	0.357882	Mir7054	7	45012426	45012487	-	62	miRNA	microRNA 7054 [Source:MGI Symbol;Acc:MGI:5530939] && - && -	-
ENSMUSG00000083465	0	2.01406	1.04314	3.38481	6.42124	4.41275	1.01907	4.7396	-2.20109	0.0573463	0.357882	Gm11652	11	105773518	105774784	+	1267	processed_pseudogene	predicted gene 11652 [Source:MGI Symbol;Acc:MGI:3651204] && sp|Q7L1Q6|BZW1_HUMAN Basic leucine zipper and W2 domain-containing protein 1 OS=Homo sapiens OX=9606 GN=BZW1 PE=1 SV=1 && -	-
ENSMUSG00000117187	2.12983	3.02109	2.08629	6.76962	7.33856	6.61913	2.4124	6.9091	-1.51587	0.0575195	1	CT033749.1	17	74438285	74438639	-	355	processed_pseudogene	elongin B (Elob) pseudogene && sp|P62869|ELOB_MOUSE Elongin-B OS=Mus musculus OX=10090 GN=Elob PE=1 SV=1 && -	-
ENSMUSG00000078183	8.51932	7.04921	8.34515	8.46203	14.6771	30.8893	7.97123	18.0095	-1.1628	0.0575318	0.358386	Gm15610	5	8971948	8972142	+	195	processed_pseudogene	predicted gene 15610 [Source:MGI Symbol;Acc:MGI:3783056] && sp|Q05AK9|TMA7_DANRE Translation machinery-associated protein 7 OS=Danio rerio OX=7955 GN=tma7 PE=3 SV=1 && -	-
ENSMUSG00000054263	152.283	141.991	237.837	120.161	125.673	131.279	177.37	125.704	0.497197	0.0575375	0.358386	Lifr	15	7090614	7197489	+	10776	protein_coding	leukemia inhibitory factor receptor [Source:MGI Symbol;Acc:MGI:96788] && sp|P42703|LIFR_MOUSE Leukemia inhibitory factor receptor OS=Mus musculus OX=10090 GN=Lifr PE=1 SV=1 && PF18207:Leukemia inhibitory factor receptor N-terminal domain|PF17971:Leukemia inhibitory factor receptor D2 domain|PF00041:Fibronectin type III domain	-
ENSMUSG00000047415	97.9722	76.5342	47.9846	121.007	119.252	93.771	74.1637	111.343	-0.588278	0.0575527	0.358386	Gpr68	12	100876682	100908198	-	7159	protein_coding	G protein-coupled receptor 68 [Source:MGI Symbol;Acc:MGI:2441763] && sp|P18943|COX1_CHICK Cytochrome c oxidase subunit 1 OS=Gallus gallus OX=9031 GN=MT-CO1 PE=3 SV=1 && -	-
ENSMUSG00000080921	322.669	262.835	245.139	344.404	334.822	387.219	276.881	355.482	-0.360047	0.0575645	0.358386	Rpl38-ps2	6	140746960	140747172	-	213	processed_pseudogene	ribosomal protein L38, pseudogene 2 [Source:MGI Symbol;Acc:MGI:3646625] && sp|Q9JJI8|RL38_MOUSE 60S ribosomal protein L38 OS=Mus musculus OX=10090 GN=Rpl38 PE=1 SV=3 && -	-
ENSMUSG00000117192	9.58424	11.0773	9.38829	4.23101	4.5866	4.41275	10.0166	4.41012	1.185	0.0577103	0.359079	AC151284.1	17	78752255	78752715	+	461	processed_pseudogene	ubiquitin-conjugating enzyme E2C (Ube2c) pseudogene && sp|Q32PA5|UBE2C_BOVIN Ubiquitin-conjugating enzyme E2 C OS=Bos taurus OX=9913 GN=UBE2C PE=2 SV=1 && PF00179:Ubiquitin-conjugating enzyme	-
ENSMUSG00000081805	2.12983	3.02109	6.25886	0	0.91732	1.10319	3.80326	0.673503	2.55742	0.0578004	0.359375	Gm14335	6	115638250	115639059	-	810	processed_pseudogene	predicted gene 14335 [Source:MGI Symbol;Acc:MGI:3801741] && sp|Q8VI33|TAF9_MOUSE Transcription initiation factor TFIID subunit 9 OS=Mus musculus OX=10090 GN=Taf9 PE=1 SV=1 && PF02291:Transcription initiation factor IID, 31kD subunit	-
ENSMUSG00000097641	0	1.00703	0	0.846203	5.50392	3.30956	0.335677	3.2199	-3.10905	0.0578268	0.359375	Gm26865	18	4373669	4379980	-	3284	lincRNA	predicted gene, 26865 [Source:MGI Symbol;Acc:MGI:5477359] && sp|Q9D0D3|PAPD1_MOUSE Poly(A) RNA polymerase, mitochondrial OS=Mus musculus OX=10090 GN=Mtpap PE=1 SV=1 && -	-
ENSMUSG00000102027	0	1.00703	2.08629	1.69241	3.66928	11.0319	1.03111	5.46452	-2.38246	0.0579846	1	Gm28914	1	131259507	131260553	+	667	antisense	predicted gene 28914 [Source:MGI Symbol;Acc:MGI:5579620] && - && -	-
ENSMUSG00000109130	0	1.00703	0	1.69241	0.91732	7.72232	0.335677	3.44401	-3.19164	0.058173	0.361121	Gm45187	7	98904268	98908055	+	3132	antisense	predicted gene 45187 [Source:MGI Symbol;Acc:MGI:5753763] && sp|Q9P2Y5|UVRAG_HUMAN UV radiation resistance-associated gene protein OS=Homo sapiens OX=9606 GN=UVRAG PE=1 SV=1 && -	-
ENSMUSG00000102193	0	2.01406	0	4.23101	9.1732	1.10319	0.671353	4.8358	-2.83399	0.0581796	1	Gm7299	1	170630921	170631501	+	581	processed_pseudogene	predicted gene 7299 [Source:MGI Symbol;Acc:MGI:3648716] && sp|Q3T025|RL17_BOVIN 60S ribosomal protein L17 OS=Bos taurus OX=9913 GN=RPL17 PE=2 SV=3 && PF00237:Ribosomal protein L22p/L17e	-
ENSMUSG00000089679	2.12983	10.0703	9.38829	3.38481	1.83464	0	7.19614	1.73982	2.00008	0.0581796	1	Gm16299	19	53819354	53825128	-	2766	antisense	predicted gene 16299 [Source:MGI Symbol;Acc:MGI:3826539] && - && -	-
ENSMUSG00000083043	1.06492	0	3.12943	2.53861	4.5866	12.1351	1.39812	6.42009	-2.19046	0.0581953	0.361121	Gm13433	2	25543479	25543718	+	240	processed_pseudogene	predicted gene 13433 [Source:MGI Symbol;Acc:MGI:3651454] && sp|P48771|CX7A2_MOUSE Cytochrome c oxidase subunit 7A2, mitochondrial OS=Mus musculus OX=10090 GN=Cox7a2 PE=1 SV=2 && -	-
ENSMUSG00000113665	0	0	2.08629	0.846203	5.50392	8.82551	0.695429	5.05854	-2.85449	0.0582391	1	Gm47603	13	63253024	63255564	-	2541	TEC	predicted gene, 47603 [Source:MGI Symbol;Acc:MGI:6096658] && - && -	-
ENSMUSG00000020020	40.4668	48.3374	43.812	36.3867	27.5196	20.9606	44.2054	28.289	0.634699	0.0582396	0.361121	Usp44	10	93831555	93858088	+	4032	protein_coding	ubiquitin specific peptidase 44 [Source:MGI Symbol;Acc:MGI:3045318] && sp|Q8C2S0|UBP44_MOUSE Ubiquitin carboxyl-terminal hydrolase 44 OS=Mus musculus OX=10090 GN=Usp44 PE=1 SV=3 && PF00443:Ubiquitin carboxyl-terminal hydrolase|PF02148:Zn-finger in ubiquitin-hydrolases and other protein	-
ENSMUSG00000091133	1.06492	1.00703	1.04314	4.23101	5.50392	3.30956	1.03836	4.34817	-2.07224	0.0582465	0.361121	Gm17108	13	69610498	69614901	-	2877	sense_overlapping	predicted gene 17108 [Source:MGI Symbol;Acc:MGI:4937935] && sp|Q68FF9|S5A1_MOUSE 3-oxo-5-alpha-steroid 4-dehydrogenase 1 OS=Mus musculus OX=10090 GN=Srd5a1 PE=2 SV=2 && -	-
ENSMUSG00000096967	12.779	11.0773	10.4314	21.1551	19.2637	19.8574	11.4292	20.0921	-0.815532	0.0583201	0.361226	Gm26621	15	68334715	68337430	-	2716	processed_transcript	predicted gene, 26621 [Source:MGI Symbol;Acc:MGI:5477115] && sp|P11369|LORF2_MOUSE LINE-1 retrotransposable element ORF2 protein OS=Mus musculus OX=10090 GN=Pol PE=1 SV=2 && PF12488:Protein of unknown function (DUF3704)	-
ENSMUSG00000114875	5.32458	1.00703	1.04314	0	0	0	2.45825	0	3.81205	0.0583327	0.361226	Gm30363	14	21449949	21473360	-	5316	processed_transcript	predicted gene, 30363 [Source:MGI Symbol;Acc:MGI:5589522] && - && -	-
ENSMUSG00000064778	4.25966	2.01406	2.08629	0	0.91732	0	2.78667	0.305773	3.03186	0.0583933	1	Snord59a	10	128084143	128084216	+	74	snoRNA	small nucleolar RNA, C/D box 59A [Source:MGI Symbol;Acc:MGI:5454983] && - && -	-
ENSMUSG00000099703	10.6492	6.04218	9.38829	4.23101	2.75196	3.30956	8.69321	3.43085	1.33333	0.0583959	0.361266	Gm28285	18	35553404	35581609	+	1264	protein_coding	predicted gene 28285 [Source:MGI Symbol;Acc:MGI:5578991] && sp|Q8K310|MATR3_MOUSE Matrin-3 OS=Mus musculus OX=10090 GN=Matr3 PE=1 SV=1 && -	-
ENSMUSG00000021040	17.0386	17.1195	23.9923	7.61582	11.9252	12.1351	19.3835	10.5587	0.885454	0.0584084	0.361266	Slirp	12	87443896	87452206	+	3104	protein_coding	SRA stem-loop interacting RNA binding protein [Source:MGI Symbol;Acc:MGI:1916394] && sp|Q9D8T7|SLIRP_MOUSE SRA stem-loop-interacting RNA-binding protein, mitochondrial OS=Mus musculus OX=10090 GN=Slirp PE=1 SV=2 && -	-
ENSMUSG00000109709	6.38949	4.02812	3.12943	0	1.83464	1.10319	4.51568	0.979276	2.23226	0.0584783	1	Gm45290	8	91528835	91532724	-	3890	TEC	predicted gene 45290 [Source:MGI Symbol;Acc:MGI:5791126] && - && -	-
ENSMUSG00000102953	1.06492	0	2.08629	4.23101	2.75196	7.72232	1.0504	4.90176	-2.22027	0.0584783	1	Gm37019	12	102589277	102591410	-	2134	TEC	predicted gene, 37019 [Source:MGI Symbol;Acc:MGI:5610247] && - && -	-
ENSMUSG00000104235	1.06492	0	0	3.38481	4.5866	1.10319	0.354972	3.02487	-3.03522	0.0585161	1	Gm37589	3	60535751	60539744	+	3994	TEC	predicted gene, 37589 [Source:MGI Symbol;Acc:MGI:5610817] && - && -	-
ENSMUSG00000037982	2.12983	2.01406	4.17257	0.846203	0	0	2.77215	0.282068	3.02598	0.0585331	0.361745	Gm9725	8	81013576	81061195	+	2860	antisense	predicted gene 9725 [Source:MGI Symbol;Acc:MGI:3646552] && sp|Q8BW70|UBP38_MOUSE Ubiquitin carboxyl-terminal hydrolase 38 OS=Mus musculus OX=10090 GN=Usp38 PE=1 SV=2 && -	-
ENSMUSG00000022683	2.12983	2.01406	4.17257	0.846203	0	0	2.77215	0.282068	3.02598	0.0585553	0.361745	Pla2g10	16	13715057	13730983	-	1504	protein_coding	phospholipase A2, group X [Source:MGI Symbol;Acc:MGI:1347522] && sp|Q9QXX3|PA2GX_MOUSE Group 10 secretory phospholipase A2 OS=Mus musculus OX=10090 GN=Pla2g10 PE=1 SV=1 && PF00068:Phospholipase A2	-
ENSMUSG00000108750	1.06492	0	0	4.23101	3.66928	1.10319	0.354972	3.00116	-3.02587	0.0585761	1	Gm44750	6	83870065	83872287	+	2223	TEC	predicted gene 44750 [Source:MGI Symbol;Acc:MGI:5753326] && - && -	-
ENSMUSG00000101365	14.9088	10.0703	10.4314	19.4627	19.2637	24.2701	11.8035	20.9988	-0.828685	0.0586478	0.361997	Gm19325	9	97047444	97067307	-	3382	lincRNA	predicted gene, 19325 [Source:MGI Symbol;Acc:MGI:5011510] && - && -	-
ENSMUSG00000030641	281.138	295.06	337.978	214.935	278.865	206.296	304.725	233.366	0.384163	0.0586656	0.361997	Ddias	7	92857525	92874247	-	3702	protein_coding	DNA damage-induced apoptosis suppressor [Source:MGI Symbol;Acc:MGI:1921291] && sp|Q6NZG4|DDIAS_MOUSE DNA damage-induced apoptosis suppressor protein OS=Mus musculus OX=10090 GN=Ddias PE=2 SV=1 && PF08646:Replication factor-A C terminal domain	-
ENSMUSG00000020782	234.281	221.547	181.507	154.855	185.299	143.414	212.445	161.189	0.397137	0.0587054	0.362028	Llgl2	11	115824049	115855780	+	4844	protein_coding	LLGL2 scribble cell polarity complex component [Source:MGI Symbol;Acc:MGI:1918843] && sp|Q3TJ91|L2GL2_MOUSE LLGL scribble cell polarity complex component 2 OS=Mus musculus OX=10090 GN=Llgl2 PE=1 SV=2 && PF08366:LLGL2	-
ENSMUSG00000100775	1.06492	1.00703	5.21572	0	0	0	2.42922	0	3.7972	0.0587536	1	Gm29107	1	23293729	23294075	+	347	lincRNA	predicted gene 29107 [Source:MGI Symbol;Acc:MGI:5579813] && - && -	-
ENSMUSG00000093429	1.06492	1.00703	5.21572	0	0	0	2.42922	0	3.7972	0.0588897	0.36295	Vmn1r-ps145	17	20969061	20969484	-	424	unprocessed_pseudogene	vomeronasal 1 receptor, pseudogene 145 [Source:MGI Symbol;Acc:MGI:3852484] && sp|Q7Z5H5|VN1R4_HUMAN Vomeronasal type-1 receptor 4 OS=Homo sapiens OX=9606 GN=VN1R4 PE=2 SV=2 && -	-
ENSMUSG00000079435	1816.75	1979.82	2162.44	2376.14	2366.69	2397.23	1986.33	2380.02	-0.260826	0.0590112	0.363484	Rpl36a	X	134585654	134588062	+	1655	protein_coding	ribosomal protein L36A [Source:MGI Symbol;Acc:MGI:1201789] && sp|Q3SZ59|RL36A_BOVIN 60S ribosomal protein L36a OS=Bos taurus OX=9913 GN=RPL36A PE=3 SV=3 && -	-
ENSMUSG00000114138	2.12983	2.01406	1.04314	5.92342	8.25588	3.30956	1.72901	5.82962	-1.76312	0.0590836	0.363504	Gm36423	13	9684226	9689544	+	1476	antisense	predicted gene, 36423 [Source:MGI Symbol;Acc:MGI:5595582] && - && -	-
ENSMUSG00000109956	3.19475	4.02812	3.12943	0.846203	0.91732	0	3.45076	0.587841	2.48778	0.0590842	0.363504	Gm45428	8	91305967	91307755	-	1789	TEC	predicted gene 45428 [Source:MGI Symbol;Acc:MGI:5791264] && - && -	-
ENSMUSG00000095432	165.062	124.872	148.126	117.622	117.417	86.0487	146.02	107.029	0.444266	0.0591205	1	Zfp748	13	67538641	67553830	-	5662	protein_coding	zinc finger protein 748 [Source:MGI Symbol;Acc:MGI:1916455] && sp|Q6P5C7|ZN728_MOUSE Zinc finger protein 728 OS=Mus musculus OX=10090 GN=Znf728 PE=2 SV=1 && PF01352:KRAB box	-
ENSMUSG00000078377	331.189	386.699	436.034	311.403	286.204	314.409	384.641	304.005	0.339759	0.0591209	0.363515	Gm4294	12	12023045	12023658	+	614	processed_pseudogene	predicted gene 4294 [Source:MGI Symbol;Acc:MGI:3782472] && sp|Q5EAD6|RL15_BOVIN 60S ribosomal protein L15 OS=Bos taurus OX=9913 GN=RPL15 PE=2 SV=3 && PF00827:Ribosomal L15	-
ENSMUSG00000108573	21.2983	16.1125	13.5609	23.6937	33.9409	27.5797	16.9905	28.4047	-0.741796	0.0592026	0.363704	Gm44986	7	122096083	122098911	+	2829	TEC	predicted gene 44986 [Source:MGI Symbol;Acc:MGI:5753562] && sp|Q9CR21|ACPM_MOUSE Acyl carrier protein, mitochondrial OS=Mus musculus OX=10090 GN=Ndufab1 PE=1 SV=1 && -	-
ENSMUSG00000058625	44.7264	20.1406	25.0354	25.3861	10.0905	7.72232	29.9675	14.3996	1.04179	0.0592616	0.363704	Gm17383	18	82338774	82339816	+	1041	pseudogene	predicted gene, 17383 [Source:MGI Symbol;Acc:MGI:4937017] && sp|P81947|TBA1B_BOVIN Tubulin alpha-1B chain OS=Bos taurus OX=9913 PE=1 SV=2 && PF03953:Tubulin C-terminal domain|PF00091:Tubulin/FtsZ family, GTPase domain	-
ENSMUSG00000105986	0	0	0	1.69241	2.75196	2.20638	0	2.21691	-3.53601	0.0592713	0.363704	Gm43065	3	103864706	103866797	+	2092	sense_intronic	predicted gene 43065 [Source:MGI Symbol;Acc:MGI:5663202] && - && -	-
ENSMUSG00000047509	0	1.00703	0	3.38481	1.83464	3.30956	0.335677	2.84301	-2.93271	0.0593249	0.363704	Gm6776	19	43280798	43281697	+	900	processed_pseudogene	predicted pseudogene 6776 [Source:MGI Symbol;Acc:MGI:3647201] && sp|Q9JHQ5|LZTL1_MOUSE Leucine zipper transcription factor-like protein 1 OS=Mus musculus OX=10090 GN=Lztfl1 PE=1 SV=1 && PF15294:Leucine zipper	-
novel.247	112.881	53.3726	136.652	113.391	81.6415	448.998	100.968	214.677	-1.08695	0.0594122	0.363704	-	GL456211.1	137751	153838	-	3946	-	- && sp|Q8BVK9|SP110_MOUSE Sp110 nuclear body protein OS=Mus musculus OX=10090 GN=Sp110 PE=1 SV=1 && PF01342:SAND domain	-
ENSMUSG00000059058	53.2458	54.3796	42.7689	56.6956	81.6415	78.3264	50.1314	72.2212	-0.523719	0.0594349	0.363704	Tma7-ps	1	171711088	171711282	+	195	processed_pseudogene	translational machinery associated 7 homolog (S. cerevisiae), pseudogene [Source:MGI Symbol;Acc:MGI:3705453] && sp|A1A4Q4|TMA7_BOVIN Translation machinery-associated protein 7 OS=Bos taurus OX=9913 GN=TMA7 PE=3 SV=1 && -	-
ENSMUSG00000107688	0	0	1.04314	2.53861	3.66928	2.20638	0.347714	2.80476	-2.91821	0.0594827	0.363704	Gm44091	6	86976529	86977177	+	649	sense_intronic	predicted gene, 44091 [Source:MGI Symbol;Acc:MGI:5690483] && - && -	-
ENSMUSG00000104524	0	0	1.04314	5.07722	2.75196	1.10319	0.347714	2.97746	-3.01595	0.0594862	0.363704	Gm37333	1	135523088	135525338	-	2251	TEC	predicted gene, 37333 [Source:MGI Symbol;Acc:MGI:5610561] && - && -	-
ENSMUSG00000097885	10.6492	12.0844	18.7766	29.6171	15.5944	30.8893	13.8367	25.3669	-0.8718	0.0594975	0.363704	5031434O11Rik	3	51560035	51567117	+	3731	processed_transcript	RIKEN cDNA 5031434O11 gene [Source:MGI Symbol;Acc:MGI:1923230] && - && -	-
ENSMUSG00000108437	9.58424	16.1125	11.4746	22.8475	19.2637	23.167	12.3904	21.7594	-0.808419	0.0595575	0.363704	Gm19366	7	128013029	128013184	-	156	processed_pseudogene	predicted gene, 19366 [Source:MGI Symbol;Acc:MGI:5011551] && sp|Q3T051|RL39_BOVIN 60S ribosomal protein L39 OS=Bos taurus OX=9913 GN=RPL39 PE=3 SV=3 && -	-
ENSMUSG00000021707	1252.34	1366.54	1677.37	1090.76	1227.37	1109.81	1432.08	1142.65	0.325722	0.0595928	0.363704	Dhfr	13	92354726	92389053	+	5347	protein_coding	dihydrofolate reductase [Source:MGI Symbol;Acc:MGI:94890] && sp|P00375|DYR_MOUSE Dihydrofolate reductase OS=Mus musculus OX=10090 GN=Dhfr PE=1 SV=3 && -	-
ENSMUSG00000071414	43.6615	33.232	61.5455	18.6165	11.9252	43.0243	46.1463	24.522	0.923846	0.0596314	1	Gm6736	12	13455023	13455970	-	948	processed_pseudogene	predicted gene 6736 [Source:MGI Symbol;Acc:MGI:3643048] && sp|P45376|ALDR_MOUSE Aldo-keto reductase family 1 member B1 OS=Mus musculus OX=10090 GN=Akr1b1 PE=1 SV=3 && PF00248:Aldo/keto reductase family	-
ENSMUSG00000106326	1.06492	5.03515	5.21572	0.846203	0	1.10319	3.77193	0.649797	2.56943	0.0596345	0.363704	Gm42977	5	56414210	56490232	+	144	transcribed_processed_pseudogene	predicted gene 42977 [Source:MGI Symbol;Acc:MGI:5663114] && - && -	-
ENSMUSG00000074527	3.19475	2.01406	0	5.92342	8.25588	4.41275	1.73627	6.19735	-1.84345	0.0596406	0.363704	Gm14296	2	176892509	176927809	-	9870	protein_coding	predicted gene 14296 [Source:MGI Symbol;Acc:MGI:3708667] && sp|P03386|ENV_MLVAV Envelope glycoprotein OS=AKV murine leukemia virus OX=11791 GN=env PE=1 SV=1 && -	-
ENSMUSG00000097786	4.25966	1.00703	3.12943	0	0	1.10319	2.79871	0.367729	3.03702	0.0596539	0.363704	4933429H19Rik	3	30792570	30793564	-	995	antisense	RIKEN cDNA 4933429H19 gene [Source:MGI Symbol;Acc:MGI:1918530] && - && -	-
ENSMUSG00000101086	3.19475	1.00703	4.17257	0	0	1.10319	2.79145	0.367729	3.03403	0.0596675	1	Gm28651	14	32685648	32689250	+	2827	lincRNA	predicted gene 28651 [Source:MGI Symbol;Acc:MGI:5579357] && - && -	-
ENSMUSG00000071141	9.58424	6.04218	13.5609	16.9241	20.181	17.651	9.72909	18.252	-0.91025	0.0597047	0.363704	Rpl36a-ps3	6	136488807	136489127	+	321	processed_pseudogene	ribosomal protein L36A, pseudogene 3 [Source:MGI Symbol;Acc:MGI:3642503] && sp|Q3SZ59|RL36A_BOVIN 60S ribosomal protein L36a OS=Bos taurus OX=9913 GN=RPL36A PE=3 SV=3 && PF00935:Ribosomal protein L44	-
ENSMUSG00000038239	0	0	4.17257	6.76962	3.66928	9.92869	1.39086	6.7892	-2.28513	0.05971	0.363704	Hrc	7	45335290	45338974	+	2566	protein_coding	histidine rich calcium binding protein [Source:MGI Symbol;Acc:MGI:96226] && sp|P16230|SRCH_RABIT Sarcoplasmic reticulum histidine-rich calcium-binding protein OS=Oryctolagus cuniculus OX=9986 GN=HRC PE=1 SV=1 && -	-
ENSMUSG00000105860	1.06492	1.00703	1.04314	1.69241	0.91732	14.3414	1.03836	5.65039	-2.42199	0.0597785	0.363909	Gm42578	3	95352784	95352977	+	194	processed_pseudogene	predicted gene 42578 [Source:MGI Symbol;Acc:MGI:5662715] && sp|Q95276|RL5_PIG 60S ribosomal protein L5 (Fragment) OS=Sus scrofa OX=9823 GN=RPL5 PE=2 SV=3 && -	-
ENSMUSG00000080873	13.8439	3.02109	12.5177	20.3089	25.685	15.4446	9.79424	20.4795	-1.07219	0.0598668	0.364234	Rpl30-ps3	2	90747616	90747963	-	348	processed_pseudogene	ribosomal protein L30, pseudogene 3 [Source:MGI Symbol;Acc:MGI:1321401] && sp|Q3T0D5|RL30_BOVIN 60S ribosomal protein L30 OS=Bos taurus OX=9913 GN=RPL30 PE=3 SV=3 && PF01248:Ribosomal protein L7Ae/L30e/S12e/Gadd45 family	-
ENSMUSG00000109894	2.12983	0	1.04314	2.53861	7.33856	4.41275	1.05766	4.76331	-2.18405	0.0600316	0.365004	Gm5904	7	136657209	136658073	+	865	processed_pseudogene	predicted gene 5904 [Source:MGI Symbol;Acc:MGI:3644469] && sp|Q3TQI7|TLS1_MOUSE Telomere length and silencing protein 1 homolog OS=Mus musculus OX=10090 PE=1 SV=2 && PF07052:Hepatocellular carcinoma-associated antigen 59	-
ENSMUSG00000034839	11.7141	20.1406	27.1217	11.0006	11.9252	7.72232	19.6588	10.216	0.936987	0.0600708	0.365004	Larp6	9	60712989	60738801	+	2440	protein_coding	La ribonucleoprotein domain family, member 6 [Source:MGI Symbol;Acc:MGI:1914807] && sp|Q8BN59|LARP6_MOUSE La-related protein 6 OS=Mus musculus OX=10090 GN=Larp6 PE=1 SV=1 && PF12901:SUZ-C motif|PF05383:La domain	-
ENSMUSG00000112673	4.25966	4.02812	3.12943	7.61582	11.9252	7.72232	3.80574	9.08777	-1.25795	0.0601672	0.365004	Gm7413	10	59871221	59871682	-	462	processed_pseudogene	predicted gene 7413 [Source:MGI Symbol;Acc:MGI:3644069] && sp|Q24JY1|RL23A_BOVIN 60S ribosomal protein L23a OS=Bos taurus OX=9913 GN=RPL23A PE=2 SV=1 && -	-
ENSMUSG00000117130	3.19475	0	8.34515	0	0.91732	0	3.84663	0.305773	3.49755	0.0601804	0.365004	AC132460.2	17	27982392	27983158	+	767	sense_intronic	novel transcript, sense intronic to Anks1 && - && -	-
ENSMUSG00000096553	0	0	0	0.846203	1.83464	4.41275	0	2.36453	-3.61635	0.0601951	0.365004	Gm10097	10	5069192	5071975	+	2784	protein_coding	predicted gene 10097 [Source:MGI Symbol;Acc:MGI:3642295] && - && -	-
ENSMUSG00000078851	9.58424	10.0703	11.4746	21.1551	22.0157	13.2383	10.3764	18.803	-0.865685	0.060221	0.365004	Hist3h2a	11	58954685	58956830	+	2146	protein_coding	histone cluster 3, H2a [Source:MGI Symbol;Acc:MGI:2448458] && sp|Q7L7L0|H2A3_HUMAN Histone H2A type 3 OS=Homo sapiens OX=9606 GN=H2AW PE=1 SV=3 && PF16211:C-terminus of histone H2A|PF00125:Core histone H2A/H2B/H3/H4	-
ENSMUSG00000051029	24.4931	32.2249	53.2003	23.6937	14.6771	25.3733	36.6394	21.248	0.789436	0.0602668	0.365004	Serpinb1b	13	33078575	33094380	+	1926	protein_coding	serine (or cysteine) peptidase inhibitor, clade B, member 1b [Source:MGI Symbol;Acc:MGI:2445361] && sp|Q8VHP7|ILEUB_MOUSE Leukocyte elastase inhibitor B OS=Mus musculus OX=10090 GN=Serpinb1b PE=1 SV=1 && PF00079:Serpin (serine protease inhibitor)	-
ENSMUSG00000029608	0	4.02812	2.08629	4.23101	4.5866	14.3414	2.03813	7.71969	-1.89678	0.0602736	0.365004	Rph3a	5	120940499	121010092	-	4639	protein_coding	rabphilin 3A [Source:MGI Symbol;Acc:MGI:102788] && sp|P47708|RP3A_MOUSE Rabphilin-3A OS=Mus musculus OX=10090 GN=Rph3a PE=1 SV=2 && -	-
ENSMUSG00000078180	3.19475	4.02812	2.08629	7.61582	8.25588	7.72232	3.10305	7.86468	-1.33933	0.0603375	0.365012	Gm20900	13	120304194	120304665	-	472	processed_pseudogene	predicted gene, 20900 [Source:MGI Symbol;Acc:MGI:5434256] && sp|Q24JY1|RL23A_BOVIN 60S ribosomal protein L23a OS=Bos taurus OX=9913 GN=RPL23A PE=2 SV=1 && PF03939:Ribosomal protein L23, N-terminal domain|PF00276:Ribosomal protein L23	-
ENSMUSG00000102606	1.06492	3.02109	3.12943	6.76962	1.83464	16.5478	2.40514	8.38403	-1.78338	0.0603451	0.365012	Rpl21-ps1	1	184617248	184617727	+	480	processed_pseudogene	ribosomal protein 21, pseudogene 1 [Source:MGI Symbol;Acc:MGI:3647596] && sp|P46778|RL21_HUMAN 60S ribosomal protein L21 OS=Homo sapiens OX=9606 GN=RPL21 PE=1 SV=2 && PF01157:Ribosomal protein L21e	-
ENSMUSG00000070345	1.06492	0	0	1.69241	4.5866	2.20638	0.354972	2.82846	-2.92802	0.0604286	1	Hsf5	11	87617164	87659542	+	4158	protein_coding	heat shock transcription factor family member 5 [Source:MGI Symbol;Acc:MGI:2685585] && sp|Q5ND04|HSF5_MOUSE Heat shock factor protein 5 OS=Mus musculus OX=10090 GN=Hsf5 PE=1 SV=1 && PF00447:HSF-type DNA-binding	-
ENSMUSG00000062365	0	0	1.04314	1.69241	4.5866	2.20638	0.347714	2.82846	-2.92802	0.0604466	0.365273	Gm4968	6	127233762	127234619	+	858	processed_pseudogene	predicted gene 4968 [Source:MGI Symbol;Acc:MGI:3647516] && sp|P25444|RS2_MOUSE 40S ribosomal protein S2 OS=Mus musculus OX=10090 GN=Rps2 PE=1 SV=3 && PF03719:Ribosomal protein S5, C-terminal domain|PF00333:Ribosomal protein S5, N-terminal domain	-
ENSMUSG00000048222	274.748	304.123	184.636	236.091	138.515	148.93	254.502	174.512	0.542833	0.0604582	0.365273	Mfap1b	2	121460235	121474067	-	3362	protein_coding	microfibrillar-associated protein 1B [Source:MGI Symbol;Acc:MGI:3694697] && sp|C0HKD8|MFA1A_MOUSE Microfibrillar-associated protein 1A OS=Mus musculus OX=10090 GN=Mfap1a PE=1 SV=1 && PF06991:Microfibril-associated/Pre-mRNA processing	-
ENSMUSG00000037005	0	0	0	2.53861	0.91732	3.30956	0	2.25516	-3.55647	0.0605494	0.365612	Xpnpep2	X	48108725	48136981	+	4878	protein_coding	X-prolyl aminopeptidase (aminopeptidase P) 2, membrane-bound [Source:MGI Symbol;Acc:MGI:2180001] && sp|B1AVD1|XPP2_MOUSE Xaa-Pro aminopeptidase 2 OS=Mus musculus OX=10090 GN=Xpnpep2 PE=1 SV=1 && PF16188:C-terminal region of peptidase_M24|PF16189:Creatinase/Prolidase N-terminal domain|PF01321:Creatinase/Prolidase N-terminal domain|PF00557:Metallopeptidase family M24	-
ENSMUSG00000088250	1.06492	0	3.12943	1.69241	4.5866	13.2383	1.39812	6.50576	-2.20858	0.0606368	0.365928	Gm26393	11	3656663	3656791	-	129	snRNA	predicted gene, 26393 [Source:MGI Symbol;Acc:MGI:5456170] && - && -	-
ENSMUSG00000113511	3.19475	1.00703	7.302	0.846203	0	1.10319	3.83459	0.649797	2.58749	0.060688	1	Gm19046	12	36172368	36173665	+	1298	processed_pseudogene	predicted gene, 19046 [Source:MGI Symbol;Acc:MGI:5011231] && sp|Q5FVM4|NONO_RAT Non-POU domain-containing octamer-binding protein OS=Rattus norvegicus OX=10116 GN=Nono PE=1 SV=3 && -	-
ENSMUSG00000110368	5.32458	4.02812	0	0	0	0	3.11757	0	4.15749	0.0607178	0.366204	Gm45518	8	64701107	64711076	-	2583	lincRNA	predicted gene 45518 [Source:MGI Symbol;Acc:MGI:5791354] && sp|P11260|LORF1_MOUSE LINE-1 retrotransposable element ORF1 protein OS=Mus musculus OX=10090 GN=Lire1 PE=1 SV=2 && -	-
ENSMUSG00000077734	2.12983	7.04921	0	16.9241	21.0984	1.10319	3.05968	13.0419	-2.09178	0.0607825	0.366374	Snord83b	15	80078498	80078591	-	94	snoRNA	small nucleolar RNA, C/D box 83B [Source:MGI Symbol;Acc:MGI:3819557] && - && -	-
ENSMUSG00000081952	11.7141	9.06327	14.604	17.7703	20.181	24.2701	11.7938	20.7405	-0.810506	0.0608163	0.366374	Gm12178	11	48289984	48290313	-	330	processed_pseudogene	predicted gene 12178 [Source:MGI Symbol;Acc:MGI:3651496] && sp|Q6ZPR6|IBTK_MOUSE Inhibitor of Bruton tyrosine kinase OS=Mus musculus OX=10090 GN=Ibtk PE=1 SV=3 && -	-
ENSMUSG00000115684	24.4931	48.3374	78.2357	21.1551	42.1967	8.82551	50.3554	24.0591	1.05969	0.060908	1	Gm6087	14	119278424	119279086	+	663	processed_pseudogene	predicted gene 6087 [Source:MGI Symbol;Acc:MGI:3644467] && sp|Q8C8M1|SHCAF_MOUSE SIN3-HDAC complex-associated factor OS=Mus musculus OX=10090 GN=Sinhcaf PE=1 SV=1 && PF15396:Protein Family FAM60A	-
ENSMUSG00000032561	2.12983	3.02109	0	5.92342	2.75196	11.0319	1.71697	6.56909	-1.92007	0.0609759	0.367034	Acpp	9	104288251	104337748	-	7330	protein_coding	acid phosphatase, prostate [Source:MGI Symbol;Acc:MGI:1928480] && sp|Q8CE08|PPAP_MOUSE Prostatic acid phosphatase OS=Mus musculus OX=10090 GN=Acp3 PE=1 SV=1 && PF00328:Histidine phosphatase superfamily (branch 2)	-
ENSMUSG00000025876	6.38949	7.04921	4.17257	8.46203	11.9252	17.651	5.87042	12.6794	-1.09813	0.0609875	1	Unc5a	13	54949411	55006018	+	4168	protein_coding	unc-5 netrin receptor A [Source:MGI Symbol;Acc:MGI:894682] && sp|Q8K1S4|UNC5A_MOUSE Netrin receptor UNC5A OS=Mus musculus OX=10090 GN=Unc5a PE=1 SV=1 && -	-
ENSMUSG00000047905	33.0124	53.3726	29.208	76.1582	65.1297	41.9212	38.531	61.0697	-0.667515	0.0609963	0.367034	Gm8566	6	67205619	67206083	+	465	processed_pseudogene	predicted pseudogene 8566 [Source:MGI Symbol;Acc:MGI:3647296] && sp|P08228|SODC_MOUSE Superoxide dismutase [Cu-Zn] OS=Mus musculus OX=10090 GN=Sod1 PE=1 SV=2 && PF00080:Copper/zinc superoxide dismutase (SODC)	-
ENSMUSG00000104960	338.643	302.109	335.892	440.872	468.751	337.576	325.548	415.733	-0.354128	0.0610733	0.367285	Snhg8	3	123507552	123508404	-	853	processed_transcript	small nucleolar RNA host gene 8 [Source:MGI Symbol;Acc:MGI:1917145] && - && -	-
ENSMUSG00000103676	0	1.00703	0	2.53861	0.91732	5.51594	0.335677	2.99062	-2.99294	0.0612421	1	Gm38204	1	170973373	170977746	+	619	antisense	predicted gene, 38204 [Source:MGI Symbol;Acc:MGI:5611432] && - && -	-
ENSMUSG00000095648	14.9088	7.04921	5.21572	5.92342	0.91732	2.20638	9.05791	3.01571	1.5624	0.0612613	0.368005	Gm2004	2	176141591	176149825	-	1753	protein_coding	predicted gene 2004 [Source:MGI Symbol;Acc:MGI:3780174] && sp|Q8BZW4|ZN120_MOUSE Zinc finger protein 120 OS=Mus musculus OX=10090 GN=Zfp120 PE=2 SV=1 && PF01352:KRAB box|PF00096:Zinc finger, C2H2 type	-
ENSMUSG00000101061	0	2.01406	1.04314	4.23101	2.75196	6.61913	1.01907	4.53403	-2.12881	0.0612636	0.368005	Platr1	1	134435628	134439597	+	3316	lincRNA	pluripotency associated transcript 1 [Source:MGI Symbol;Acc:MGI:5580349] && - && -	-
ENSMUSG00000088139	5.32458	2.01406	1.04314	0	0.91732	0	2.79393	0.305773	3.03516	0.0613932	1	Gm27343	2	152417262	152417324	+	63	snRNA	predicted gene, 27343 [Source:MGI Symbol;Acc:MGI:5530725] && - && -	-
ENSMUSG00000109154	0	1.00703	1.04314	2.53861	6.42124	2.20638	0.683391	3.72208	-2.43973	0.0614237	0.368754	Gm44822	7	49814202	49820590	+	6389	TEC	predicted gene 44822 [Source:MGI Symbol;Acc:MGI:5753398] && sp|P11369|LORF2_MOUSE LINE-1 retrotransposable element ORF2 protein OS=Mus musculus OX=10090 GN=Pol PE=1 SV=2 && -	-
ENSMUSG00000113440	6.38949	9.06327	8.34515	11.0006	17.4291	17.651	7.93263	15.3602	-0.945087	0.0614789	1	Gm46404	13	23441822	23445935	-	4114	lincRNA	predicted gene, 46404 [Source:MGI Symbol;Acc:MGI:5826041] && - && -	-
ENSMUSG00000022853	77.7388	41.2882	37.5532	35.5405	37.6101	18.7542	52.1934	30.6349	0.760616	0.0615253	0.369152	Ehhadh	16	21761287	21787807	-	2981	protein_coding	enoyl-Coenzyme A, hydratase/3-hydroxyacyl Coenzyme A dehydrogenase [Source:MGI Symbol;Acc:MGI:1277964] && sp|Q9DBM2|ECHP_MOUSE Peroxisomal bifunctional enzyme OS=Mus musculus OX=10090 GN=Ehhadh PE=1 SV=4 && PF00725:3-hydroxyacyl-CoA dehydrogenase, C-terminal domain|PF00378:Enoyl-CoA hydratase/isomerase|PF02737:3-hydroxyacyl-CoA dehydrogenase, NAD binding domain	-
ENSMUSG00000031220	10.6492	18.1265	13.5609	5.92342	5.50392	9.92869	14.1122	7.11868	1.00598	0.0615979	0.369375	Awat2	X	100402221	100442717	-	2126	protein_coding	acyl-CoA wax alcohol acyltransferase 2 [Source:MGI Symbol;Acc:MGI:3045345] && sp|Q6E1M8|AWAT2_MOUSE Acyl-CoA wax alcohol acyltransferase 2 OS=Mus musculus OX=10090 GN=Awat2 PE=1 SV=1 && PF03982:Diacylglycerol acyltransferase	-
ENSMUSG00000088268	2.12983	3.02109	5.21572	0.846203	0	1.10319	3.45555	0.649797	2.44197	0.0616327	1	Gm24776	5	72971179	72971264	-	86	snRNA	predicted gene, 24776 [Source:MGI Symbol;Acc:MGI:5454553] && - && -	-
ENSMUSG00000047528	0	0	1.04314	5.92342	1.83464	1.10319	0.347714	2.95375	-3.00525	0.0616574	0.369519	Als2cr12	1	58646903	58695989	-	3396	protein_coding	amyotrophic lateral sclerosis 2 chromosome region 12 [Source:MGI Symbol;Acc:MGI:1918359] && sp|Q8BVM7|FACC1_MOUSE Flagellum-associated coiled-coil domain-containing protein 1 OS=Mus musculus OX=10090 GN=Flacc1 PE=1 SV=1 && -	-
ENSMUSG00000099843	62.83	52.3655	59.4592	62.619	88.0628	95.9774	58.2182	82.2197	-0.494644	0.0617443	0.369716	Gm7160	1	105979350	105990282	-	1417	lincRNA	predicted gene 7160 [Source:MGI Symbol;Acc:MGI:3646078] && - && -	-
ENSMUSG00000018845	1.06492	0	9.38829	0	0	0	3.4844	0	4.31755	0.0617612	0.369716	Unc45b	11	82910550	82943403	+	4493	protein_coding	unc-45 myosin chaperone B [Source:MGI Symbol;Acc:MGI:2443377] && sp|Q8CGY6|UN45B_MOUSE Protein unc-45 homolog B OS=Mus musculus OX=10090 GN=Unc45b PE=1 SV=1 && -	-
ENSMUSG00000086039	7.45441	4.02812	10.4314	3.38481	0.91732	3.30956	7.30465	2.53723	1.53018	0.0618056	0.369769	Gm12227	11	54728677	54734323	+	563	antisense	predicted gene 12227 [Source:MGI Symbol;Acc:MGI:3649740] && - && -	-
ENSMUSG00000007877	3.19475	0	1.04314	3.38481	11.0078	3.30956	1.41263	5.90074	-2.08001	0.0618967	0.370102	Tcap	11	98383811	98384953	+	948	protein_coding	titin-cap [Source:MGI Symbol;Acc:MGI:1330233] && sp|O70548|TELT_MOUSE Telethonin OS=Mus musculus OX=10090 GN=Tcap PE=1 SV=1 && PF09470:Telethonin protein	-
ENSMUSG00000086468	0	0	0	10.1544	0.91732	0	0	3.69058	-4.28105	0.062017	0.370528	Etaa1os	11	17953970	17959578	+	856	antisense	Ewing tumor-associated antigen 1, opposite strand [Source:MGI Symbol;Acc:MGI:1920221] && - && -	-
ENSMUSG00000077227	1.06492	2.01406	5.21572	0.846203	0	0	2.7649	0.282068	3.023	0.0620391	0.370528	Gm22272	19	11933495	11933628	-	134	snoRNA	predicted gene, 22272 [Source:MGI Symbol;Acc:MGI:5452049] && - && -	-
ENSMUSG00000043687	4.25966	3.02109	14.604	3.38481	0.91732	2.20638	7.29492	2.1695	1.74044	0.0620928	1	1190005I06Rik	8	120608602	120647632	-	1083	protein_coding	RIKEN cDNA 1190005I06 gene [Source:MGI Symbol;Acc:MGI:1916168] && sp|Q8K1L6|CP074_MOUSE Uncharacterized protein C16orf74 homolog OS=Mus musculus OX=10090 PE=3 SV=3 && -	-
ENSMUSG00000103898	12.779	7.04921	10.4314	12.693	13.7598	36.4052	10.0865	20.9527	-1.04447	0.0622936	1	Gm30238	12	112690986	112693588	-	2603	TEC	predicted gene, 30238 [Source:MGI Symbol;Acc:MGI:5589397] && - && -	-
ENSMUSG00000104823	3.19475	6.04218	0	0	0	0	3.07897	0	4.14089	0.0623497	1	Gm43182	5	43782243	43784770	+	2528	TEC	predicted gene 43182 [Source:MGI Symbol;Acc:MGI:5663319] && - && -	-
ENSMUSG00000085891	3.19475	2.01406	1.04314	0	0	0	2.08398	0	3.57567	0.0623548	1	Gm14634	X	12762278	12821492	+	2622	processed_transcript	predicted gene 14634 [Source:MGI Symbol;Acc:MGI:3705147] && - && -	-
ENSMUSG00000087963	0	0	0	4.23101	0	5.51594	0	3.24898	-4.085	0.0624136	0.372551	Gm25394	13	49684301	49684433	+	133	snoRNA	predicted gene, 25394 [Source:MGI Symbol;Acc:MGI:5455171] && - && -	-
ENSMUSG00000096768	456.849	387.706	267.045	808.124	844.852	239.392	370.533	630.789	-0.76815	0.0625384	0.373083	Gm47283	Y	90784738	90816464	+	1124	protein_coding	predicted gene, 47283 [Source:MGI Symbol;Acc:MGI:6096131] && - && -	-
ENSMUSG00000030337	432.356	477.332	382.834	523.799	498.105	574.761	430.84	532.222	-0.304216	0.0625824	0.373132	Vamp1	6	125215551	125245964	+	10167	protein_coding	vesicle-associated membrane protein 1 [Source:MGI Symbol;Acc:MGI:1313276] && - && -	-
ENSMUSG00000081251	0	0	1.04314	1.69241	0.91732	6.61913	0.347714	3.07629	-3.02858	0.0626618	1	Gm12164	11	45829319	45829869	+	551	processed_pseudogene	predicted gene 12164 [Source:MGI Symbol;Acc:MGI:3650637] && sp|P29391|FRIL1_MOUSE Ferritin light chain 1 OS=Mus musculus OX=10090 GN=Ftl1 PE=1 SV=2 && PF00210:Ferritin-like domain	-
ENSMUSG00000092223	1.06492	7.04921	3.12943	0	0.91732	1.10319	3.74785	0.673503	2.53583	0.0626836	0.3735	Gm19807	17	37130909	37131575	+	667	processed_pseudogene	predicted gene, 19807 [Source:MGI Symbol;Acc:MGI:5011992] && sp|Q9D0B6|PBDC1_MOUSE Protein PBDC1 OS=Mus musculus OX=10090 GN=Pbdc1 PE=1 SV=1 && -	-
ENSMUSG00000087138	53.2458	74.5202	47.9846	93.9285	68.799	88.2551	58.5835	83.6609	-0.512823	0.0627159	0.3735	Gm15545	7	44986900	44994597	+	1976	antisense	predicted gene 15545 [Source:MGI Symbol;Acc:MGI:3782994] && - && -	-
ENSMUSG00000039873	84.1283	70.4921	79.2789	115.084	98.1533	95.9774	77.9664	103.071	-0.405343	0.0628803	0.374265	Neurl2	2	164830732	164833456	-	1014	protein_coding	neuralized E3 ubiquitin protein ligase 2 [Source:MGI Symbol;Acc:MGI:3043305] && sp|Q9D0S4|NEUL2_MOUSE Neuralized-like protein 2 OS=Mus musculus OX=10090 GN=Neurl2 PE=1 SV=1 && PF07177:Neuralized|PF07525:SOCS box	-
ENSMUSG00000104204	4.25966	4.02812	7.302	1.69241	0.91732	2.20638	5.19659	1.60537	1.71096	0.062998	1	Gm37397	6	57684739	57687580	-	2842	TEC	predicted gene, 37397 [Source:MGI Symbol;Acc:MGI:5610625] && - && -	-
ENSMUSG00000084304	1.06492	2.01406	0	7.61582	2.75196	3.30956	1.02632	4.55912	-2.15253	0.0630167	0.374523	Gm6142	16	4320356	4320680	-	325	processed_pseudogene	predicted pseudogene 6142 [Source:MGI Symbol;Acc:MGI:3644670] && sp|P48428|TBCA_MOUSE Tubulin-specific chaperone A OS=Mus musculus OX=10090 GN=Tbca PE=1 SV=3 && PF02970:Tubulin binding cofactor A	-
ENSMUSG00000085782	2.12983	5.03515	0	5.92342	8.25588	8.82551	2.38833	7.66827	-1.6706	0.0630671	0.374523	Gm15624	6	83166152	83172755	-	3889	antisense	predicted gene 15624 [Source:MGI Symbol;Acc:MGI:3783068] && - && -	-
ENSMUSG00000093452	2.12983	0	5.21572	9.30823	7.33856	6.61913	2.44852	7.75531	-1.67338	0.0630713	0.374523	Zfhx2os	14	55053869	55075873	+	4453	antisense	zinc finger homeobox 2, opposite strand [Source:MGI Symbol;Acc:MGI:3620246] && sp|Q2MHN3|ZFHX2_MOUSE Zinc finger homeobox protein 2 OS=Mus musculus OX=10090 GN=Zfhx2 PE=1 SV=1 && -	-
ENSMUSG00000100215	22.3632	19.1336	7.302	43.1563	36.6928	15.4446	16.2663	31.7646	-0.97225	0.0631161	0.374523	Gm8292	1	55335401	55335796	+	396	processed_pseudogene	predicted gene 8292 [Source:MGI Symbol;Acc:MGI:3648460] && sp|Q56JU9|RS24_BOVIN 40S ribosomal protein S24 OS=Bos taurus OX=9913 GN=RPS24 PE=2 SV=2 && PF01282:Ribosomal protein S24e	-
ENSMUSG00000017195	1.06492	3.02109	2.08629	0	0	0	2.05743	0	3.56011	0.0631179	0.374523	Zpbp2	11	98551097	98558665	+	1683	protein_coding	zona pellucida binding protein 2 [Source:MGI Symbol;Acc:MGI:1916626] && sp|Q6X786|ZPBP2_MOUSE Zona pellucida-binding protein 2 OS=Mus musculus OX=10090 GN=Zpbp2 PE=1 SV=2 && PF07354:Zona-pellucida-binding protein (Sp38)	-
ENSMUSG00000106424	0	0	1.04314	1.69241	0	11.0319	0.347714	4.24143	-3.49814	0.0631506	1	Gm34866	3	144749482	144750087	+	515	antisense	predicted gene, 34866 [Source:MGI Symbol;Acc:MGI:5594025] && sp|Q9QX15|CA3A1_MOUSE Calcium-activated chloride channel regulator 3A-1 OS=Mus musculus OX=10090 GN=Clca3a1 PE=1 SV=1 && -	-
ENSMUSG00000045064	60.7002	59.4147	43.812	43.1563	39.4448	15.4446	54.6423	32.6819	0.731393	0.0632233	0.374523	Zc2hc1c	12	85288591	85299358	+	4482	protein_coding	zinc finger, C2HC-type containing 1C [Source:MGI Symbol;Acc:MGI:1919600] && sp|Q8CCG1|ZC21C_MOUSE Zinc finger C2HC domain-containing protein 1C OS=Mus musculus OX=10090 GN=Zc2hc1c PE=2 SV=1 && PF13913:zinc-finger of a C2HC-type	-
ENSMUSG00000063739	8.51932	3.02109	2.08629	11.0006	9.1732	12.1351	4.54223	10.7696	-1.24914	0.0632699	0.374523	Gm4963	5	137993047	137993424	-	378	processed_pseudogene	predicted gene 4963 [Source:MGI Symbol;Acc:MGI:3645168] && sp|Q56JX5|RS25_BOVIN 40S ribosomal protein S25 OS=Bos taurus OX=9913 GN=RPS25 PE=2 SV=1 && PF03297:S25 ribosomal protein	-
ENSMUSG00000029049	26.6229	24.1687	25.0354	36.3867	30.2716	50.7467	25.2757	39.135	-0.624654	0.0632851	0.374523	Morn1	4	155086577	155145505	+	4320	protein_coding	MORN repeat containing 1 [Source:MGI Symbol;Acc:MGI:1924116] && sp|Q641X6|MORN1_RAT MORN repeat-containing protein 1 OS=Rattus norvegicus OX=10116 GN=Morn1 PE=1 SV=1 && -	-
ENSMUSG00000104291	0	0	0	2.53861	2.75196	1.10319	0	2.13125	-3.48805	0.0632967	0.374523	A130071D04Rik	1	138161820	138167683	-	5864	TEC	RIKEN cDNA A130071D04 gene [Source:MGI Symbol;Acc:MGI:2444749] && - && -	-
ENSMUSG00000081373	0	0	0	2.53861	2.75196	1.10319	0	2.13125	-3.48805	0.063342	0.374523	Gm16436	X	58630187	58632738	-	1607	processed_pseudogene	predicted gene 16436 [Source:MGI Symbol;Acc:MGI:3645326] && sp|P52293|IMA1_MOUSE Importin subunit alpha-1 OS=Mus musculus OX=10090 GN=Kpna2 PE=1 SV=2 && -	-
ENSMUSG00000086665	0	0	0	2.53861	2.75196	1.10319	0	2.13125	-3.48805	0.0633444	0.374523	Gm13067	4	150049013	150056976	+	404	lincRNA	predicted gene 13067 [Source:MGI Symbol;Acc:MGI:3651968] && - && -	-
novel.59	1.06492	1.00703	0	0	0.91732	17.651	0.690648	6.18944	-3.14934	0.0633548	0.374523	-	13	68234813	68235202	-	390	-	- && - && -	-
ENSMUSG00000112770	2.12983	2.01406	0	5.92342	11.0078	1.10319	1.3813	6.01148	-2.13115	0.0634349	0.37464	Gm48210	12	4222102	4223361	+	1260	TEC	predicted gene, 48210 [Source:MGI Symbol;Acc:MGI:6097604] && sp|P11369|LORF2_MOUSE LINE-1 retrotransposable element ORF2 protein OS=Mus musculus OX=10090 GN=Pol PE=1 SV=2 && -	-
ENSMUSG00000034156	11.7141	27.1898	46.9414	27.9247	32.1062	133.486	28.6151	64.5056	-1.16791	0.0634722	0.37464	Tspoap1	11	87760541	87785928	+	9499	protein_coding	TSPO associated protein 1 [Source:MGI Symbol;Acc:MGI:2450877] && sp|Q7TNF8|RIMB1_MOUSE Peripheral-type benzodiazepine receptor-associated protein 1 OS=Mus musculus OX=10090 GN=Tspoap1 PE=2 SV=2 && PF07653:Variant SH3 domain|PF14604:Variant SH3 domain	-
ENSMUSG00000087060	13.8439	22.1547	8.34515	30.4633	20.181	28.6829	14.7812	26.4424	-0.836	0.0634907	0.37464	Eldr	11	16935154	16951282	-	2426	processed_transcript	Egfr long non-coding downstream RNA [Source:MGI Symbol;Acc:MGI:1919985] && - && -	-
ENSMUSG00000039781	249.19	241.687	211.758	322.403	275.196	278.003	234.212	291.868	-0.318379	0.0635635	0.37464	Cep131	11	120064430	120086827	-	3833	protein_coding	centrosomal protein 131 [Source:MGI Symbol;Acc:MGI:107440] && sp|Q62036|CP131_MOUSE Centrosomal protein of 131 kDa OS=Mus musculus OX=10090 GN=Cep131 PE=1 SV=2 && -	-
ENSMUSG00000081619	3.19475	10.0703	18.7766	3.38481	0.91732	6.61913	10.6805	3.64042	1.57754	0.0635938	0.37464	Gm13351	2	18179029	18179442	-	414	processed_pseudogene	predicted gene 13351 [Source:MGI Symbol;Acc:MGI:3651067] && sp|P51991|ROA3_HUMAN Heterogeneous nuclear ribonucleoprotein A3 OS=Homo sapiens OX=9606 GN=HNRNPA3 PE=1 SV=2 && PF00076:RNA recognition motif. (a.k.a. RRM, RBD, or RNP domain)	-
ENSMUSG00000115593	2.12983	2.01406	8.34515	15.2316	11.9252	5.51594	4.16301	10.8909	-1.39864	0.0635959	0.37464	Gm4824	15	25840120	25840611	-	492	processed_pseudogene	predicted gene 4824 [Source:MGI Symbol;Acc:MGI:3643521] && sp|P14851|PPIA_CRIGR Peptidyl-prolyl cis-trans isomerase A OS=Cricetulus griseus OX=10029 GN=PPIA PE=2 SV=2 && PF00160:Cyclophilin type peptidyl-prolyl cis-trans isomerase/CLD	-
ENSMUSG00000089999	29.8176	15.1054	27.1217	36.3867	32.1062	47.4371	24.0149	38.6433	-0.684541	0.0635995	1	Gm6485	3	104752727	104753165	-	439	transcribed_processed_pseudogene	predicted gene 6485 [Source:MGI Symbol;Acc:MGI:3644007] && sp|C0HL66|H33A_DROME Histone H3.3A OS=Drosophila melanogaster OX=7227 GN=His3.3A PE=1 SV=1 && PF00125:Core histone H2A/H2B/H3/H4	-
ENSMUSG00000111481	4.25966	14.0984	11.4746	3.38481	5.50392	3.30956	9.94422	4.0661	1.28903	0.0636501	1	Gm47652	9	37329767	37334429	-	4663	TEC	predicted gene, 47652 [Source:MGI Symbol;Acc:MGI:6096735] && sp|P11365|GAG_IPMA Intracisternal A-particle Gag-related polyprotein OS=Mouse intracisternal a-particle MIA14 OX=11753 GN=gag PE=3 SV=2 && -	-
ENSMUSG00000091570	0	0	0	3.38481	0.91732	2.20638	0	2.1695	-3.5088	0.0637125	0.37464	Gm7707	14	32266593	32267748	-	1156	processed_pseudogene	predicted gene 7707 [Source:MGI Symbol;Acc:MGI:3646976] && sp|Q9CRD2|EMC2_MOUSE ER membrane protein complex subunit 2 OS=Mus musculus OX=10090 GN=Emc2 PE=1 SV=1 && PF14559:Tetratricopeptide repeat	-
ENSMUSG00000087057	0	0	0	3.38481	0.91732	2.20638	0	2.1695	-3.5088	0.0637207	0.37464	Gm11730	11	117094948	117097067	-	829	antisense	predicted gene 11730 [Source:MGI Symbol;Acc:MGI:3650941] && - && -	-
ENSMUSG00000112637	0	0	0	3.38481	0.91732	2.20638	0	2.1695	-3.5088	0.0637663	0.37464	Gm48225	12	78261293	78266375	+	5083	TEC	predicted gene, 48225 [Source:MGI Symbol;Acc:MGI:6097625] && - && -	-
ENSMUSG00000026792	307.761	340.376	286.864	371.483	374.267	394.941	311.667	380.23	-0.286217	0.0637876	0.37464	Lrsam1	2	32925216	32961614	-	5145	protein_coding	leucine rich repeat and sterile alpha motif containing 1 [Source:MGI Symbol;Acc:MGI:2684789] && sp|Q80ZI6|LRSM1_MOUSE E3 ubiquitin-protein ligase LRSAM1 OS=Mus musculus OX=10090 GN=Lrsam1 PE=1 SV=1 && PF00536:SAM domain (Sterile alpha motif)|PF13920:Zinc finger, C3HC4 type (RING finger)|PF13855:Leucine rich repeat	-
ENSMUSG00000087135	2.12983	0	0	2.53861	1.83464	8.82551	0.709944	4.39958	-2.63573	0.0638162	0.37464	Gm16096	9	40780742	40784181	-	834	processed_transcript	predicted gene 16096 [Source:MGI Symbol;Acc:MGI:3801985] && - && -	-
ENSMUSG00000051255	681.546	760.307	1047.32	627.036	584.333	697.215	829.723	636.195	0.383478	0.0638501	0.37464	Gm6563	19	23675844	23676712	+	869	protein_coding	predicted pseudogene 6563 [Source:MGI Symbol;Acc:MGI:3646907] && sp|Q9D1J3|SARNP_MOUSE SAP domain-containing ribonucleoprotein OS=Mus musculus OX=10090 GN=Sarnp PE=1 SV=3 && PF02037:SAP domain	-
ENSMUSG00000103369	0	0	0	1.69241	3.66928	1.10319	0	2.15496	-3.50169	0.063865	0.37464	Gm6546	3	66029540	66031519	-	766	processed_pseudogene	predicted gene 6546 [Source:MGI Symbol;Acc:MGI:3643872] && sp|P62424|RL7A_HUMAN 60S ribosomal protein L7a OS=Homo sapiens OX=9606 GN=RPL7A PE=1 SV=2 && -	-
ENSMUSG00000043398	9.58424	6.04218	5.21572	9.30823	17.4291	15.4446	6.94738	14.0607	-1.0144	0.0638778	0.37464	Gpr135	12	72067976	72071125	-	3150	protein_coding	G protein-coupled receptor 135 [Source:MGI Symbol;Acc:MGI:2676315] && sp|Q7TQP2|GP135_MOUSE G-protein coupled receptor 135 OS=Mus musculus OX=10090 GN=Gpr135 PE=2 SV=1 && PF00001:7 transmembrane receptor (rhodopsin family)	-
ENSMUSG00000010825	2.12983	1.00703	0	5.07722	4.5866	3.30956	1.04562	4.32446	-2.06088	0.0640011	0.375049	Grid2ip	5	143357338	143392152	+	6773	protein_coding	glutamate receptor, ionotropic, delta 2 (Grid2) interacting protein 1 [Source:MGI Symbol;Acc:MGI:2176213] && sp|Q0QWG9|GRD2I_MOUSE Delphilin OS=Mus musculus OX=10090 GN=Grid2ip PE=1 SV=1 && PF00595:PDZ domain|PF02181:Formin Homology 2 Domain	-
ENSMUSG00000109675	1.06492	3.02109	0	4.23101	2.75196	9.92869	1.362	5.63722	-2.02488	0.0641569	0.375049	Nxpe1-ps	9	48418321	48431959	+	1806	transcribed_unprocessed_pseudogene	neurexophilin and PC-esterase domain family, member 1, pseudogene [Source:MGI Symbol;Acc:MGI:3646632] && sp|Q52KP5|NXPE4_MOUSE NXPE family member 4 OS=Mus musculus OX=10090 GN=Nxpe4 PE=2 SV=1 && -	-
ENSMUSG00000074973	4.25966	11.0773	3.12943	17.7703	7.33856	17.651	6.15547	14.2533	-1.20379	0.064164	0.375049	Gm11382	13	32938513	32938691	-	179	unprocessed_pseudogene	predicted pseudogene 11382 [Source:MGI Symbol;Acc:MGI:3650578] && sp|P50453|SPB9_HUMAN Serpin B9 OS=Homo sapiens OX=9606 GN=SERPINB9 PE=1 SV=1 && -	-
ENSMUSG00000051723	14.9088	4.02812	10.4314	16.0779	17.4291	24.2701	9.78946	19.259	-0.975668	0.0641908	1	Rpl31-ps13	13	100415565	100415942	+	378	processed_pseudogene	ribosomal protein L31, pseudogene 13 [Source:MGI Symbol;Acc:MGI:3809036] && sp|Q56JX3|RL31_BOVIN 60S ribosomal protein L31 OS=Bos taurus OX=9913 GN=RPL31 PE=2 SV=1 && PF01198:Ribosomal protein L31e	-
ENSMUSG00000069188	76.6739	63.4429	92.8397	104.929	95.4013	114.732	77.6522	105.021	-0.434868	0.0641965	0.375049	Gm13192	2	4959545	4959752	-	208	processed_pseudogene	predicted gene 13192 [Source:MGI Symbol;Acc:MGI:3651075] && sp|Q56JX6|RS28_BOVIN 40S ribosomal protein S28 OS=Bos taurus OX=9913 GN=RPS28 PE=3 SV=1 && -	-
ENSMUSG00000059897	326.929	332.32	344.237	296.171	253.18	273.591	334.495	274.314	0.285751	0.0642261	0.375049	Zfp930	8	69209038	69230536	+	5216	protein_coding	zinc finger protein 930 [Source:MGI Symbol;Acc:MGI:2675306] && sp|E9QAG8|ZN431_MOUSE Zinc finger protein 431 OS=Mus musculus OX=10090 GN=Znf431 PE=1 SV=1 && PF01352:KRAB box|PF00096:Zinc finger, C2H2 type	-
ENSMUSG00000031355	28.7527	35.246	29.208	18.6165	25.685	13.2383	31.0689	19.1799	0.68822	0.064231	0.375049	Arhgap6	X	168795099	169304435	+	12128	protein_coding	Rho GTPase activating protein 6 [Source:MGI Symbol;Acc:MGI:1196332] && sp|O54834|RHG06_MOUSE Rho GTPase-activating protein 6 OS=Mus musculus OX=10090 GN=Arhgap6 PE=1 SV=3 && -	-
ENSMUSG00000113255	10.6492	5.03515	7.302	18.6165	13.7598	12.1351	7.6621	14.8371	-0.963791	0.0642397	0.375049	Tes3-ps	13	49493318	49496589	+	3272	protein_coding	testis derived transcript 3, pseudogene [Source:MGI Symbol;Acc:MGI:3582925] && sp|Q9QZ73|DCNL1_MOUSE DCN1-like protein 1 OS=Mus musculus OX=10090 GN=Dcun1d1 PE=2 SV=1 && PF03556:Cullin binding|PF14555:UBA-like domain	-
ENSMUSG00000000197	1.06492	0	0	2.53861	4.5866	1.10319	0.354972	2.7428	-2.89235	0.0642421	0.375049	Nalcn	14	123276634	123627144	-	14715	protein_coding	sodium leak channel, non-selective [Source:MGI Symbol;Acc:MGI:2444306] && sp|Q8BXR5|NALCN_MOUSE Sodium leak channel non-selective protein OS=Mus musculus OX=10090 GN=Nalcn PE=1 SV=2 && PF00520:Ion transport protein	-
ENSMUSG00000039018	198.074	177.237	166.903	222.551	209.149	249.321	180.738	227.007	-0.327817	0.0642803	0.375049	Mtg1	7	140137564	140150786	+	4006	protein_coding	mitochondrial ribosome-associated GTPase 1 [Source:MGI Symbol;Acc:MGI:2685015] && sp|Q8R2R6|MTG1_MOUSE Mitochondrial ribosome-associated GTPase 1 OS=Mus musculus OX=10090 GN=Mtg1 PE=1 SV=2 && -	-
ENSMUSG00000084592	7.45441	12.0844	7.302	5.92342	2.75196	2.20638	8.94692	3.62725	1.27897	0.0643075	0.375049	Mir1898	15	12171492	12171574	+	83	miRNA	microRNA 1898 [Source:MGI Symbol;Acc:MGI:3811421] && - && -	-
ENSMUSG00000109873	1.06492	5.03515	7.302	10.1544	3.66928	25.3733	4.46736	13.0657	-1.53515	0.0644383	0.375602	Gm45407	8	77368841	77372516	-	3676	TEC	predicted gene 45407 [Source:MGI Symbol;Acc:MGI:5791243] && - && -	-
ENSMUSG00000029660	1.06492	3.02109	0	9.30823	2.75196	4.41275	1.362	5.49098	-2.008	0.0645075	0.375754	Tex26	5	149439660	149470979	+	2065	protein_coding	testis expressed 26 [Source:MGI Symbol;Acc:MGI:1923110] && sp|Q0VB26|TEX26_MOUSE Testis-expressed protein 26 OS=Mus musculus OX=10090 GN=Tex26 PE=2 SV=1 && -	-
ENSMUSG00000016493	43.6615	44.3093	47.9846	57.5418	76.1376	56.2626	45.3185	63.314	-0.483869	0.0645365	0.375754	Cd46	1	195036826	195092249	-	7603	protein_coding	CD46 antigen, complement regulatory protein [Source:MGI Symbol;Acc:MGI:1203290] && sp|O88174|MCP_MOUSE Membrane cofactor protein OS=Mus musculus OX=10090 GN=Cd46 PE=1 SV=1 && PF00084:Sushi repeat (SCR repeat)	-
ENSMUSG00000061723	9.58424	2.01406	10.4314	2.53861	2.75196	2.20638	7.34324	2.49898	1.54702	0.064577	1	Tnnt3	7	142498836	142516009	+	1583	protein_coding	troponin T3, skeletal, fast [Source:MGI Symbol;Acc:MGI:109550] && sp|P09739|TNNT3_RAT Troponin T, fast skeletal muscle OS=Rattus norvegicus OX=10116 GN=Tnnt3 PE=1 SV=2 && PF00992:Troponin	-
ENSMUSG00000107225	0	0	0	3.38481	1.83464	1.10319	0	2.10755	-3.47386	0.064599	0.375908	Gm43637	5	117130323	117133248	+	2926	TEC	predicted gene 43637 [Source:MGI Symbol;Acc:MGI:5663774] && - && -	-
ENSMUSG00000065593	0	0	0	3.38481	1.83464	1.10319	0	2.10755	-3.47386	0.0647015	0.376134	Mir339	5	139369650	139369745	-	96	miRNA	microRNA 339 [Source:MGI Symbol;Acc:MGI:3619354] && - && -	-
ENSMUSG00000035191	0	0	0	3.38481	1.83464	1.10319	0	2.10755	-3.47386	0.0647039	1	Rfpl4	7	5109787	5116950	-	1716	protein_coding	ret finger protein-like 4 [Source:MGI Symbol;Acc:MGI:2149590] && sp|Q8VH31|RFPLA_MOUSE Ret finger protein-like 4A OS=Mus musculus OX=10090 GN=Rfpl4a PE=1 SV=1 && PF00622:SPRY domain|PF13765:SPRY-associated domain|PF15227:zinc finger of C3HC4-type, RING|PF11002:RFPL defining motif (RDM)	-
ENSMUSG00000105609	1.06492	2.01406	9.38829	1.69241	0	0	4.15575	0.564135	2.80028	0.0647101	0.376134	Gm42501	5	143314839	143315864	+	1026	TEC	predicted gene 42501 [Source:MGI Symbol;Acc:MGI:5662638] && sp|Q8BGA7|CG026_MOUSE Uncharacterized protein C7orf26 homolog OS=Mus musculus OX=10090 PE=2 SV=1 && -	-
ENSMUSG00000073609	58.5703	66.464	34.4237	78.6968	58.7085	109.216	53.1527	82.207	-0.625586	0.0647702	1	D2hgdh	1	93824909	93852348	+	4281	protein_coding	D-2-hydroxyglutarate dehydrogenase [Source:MGI Symbol;Acc:MGI:2138209] && sp|Q8CIM3|D2HDH_MOUSE D-2-hydroxyglutarate dehydrogenase, mitochondrial OS=Mus musculus OX=10090 GN=D2hgdh PE=1 SV=3 && PF02913:FAD linked oxidases, C-terminal domain|PF01565:FAD binding domain	-
ENSMUSG00000032566	0	0	0	0	0.91732	9.92869	0	3.61534	-4.23205	0.0648278	0.376608	1700080E11Rik	9	105143342	105145092	-	1006	protein_coding	RIKEN cDNA 1700080E11 gene [Source:MGI Symbol;Acc:MGI:1920782] && sp|A1A4Q9|NUD16_BOVIN U8 snoRNA-decapping enzyme OS=Bos taurus OX=9913 GN=NUDT16 PE=2 SV=1 && -	-
ENSMUSG00000107994	3.19475	0	1.04314	5.92342	2.75196	7.72232	1.41263	5.4659	-1.96012	0.0649151	0.376903	D830050J10Rik	6	115675968	115677780	+	1813	bidirectional_promoter_lncRNA	RIKEN cDNA D830050J10 gene [Source:MGI Symbol;Acc:MGI:2444203] && - && -	-
ENSMUSG00000029556	1.06492	4.02812	1.04314	4.23101	11.0078	4.41275	2.04539	6.55054	-1.67278	0.0649522	0.376903	Hnf1a	5	114948980	114971094	-	5032	protein_coding	HNF1 homeobox A [Source:MGI Symbol;Acc:MGI:98504] && sp|P22361|HNF1A_MOUSE Hepatocyte nuclear factor 1-alpha OS=Mus musculus OX=10090 GN=Hnf1a PE=1 SV=2 && -	-
ENSMUSG00000022361	838.088	875.109	833.471	709.964	751.285	707.144	848.89	722.798	0.231927	0.0649905	1	Zhx1	15	58047003	58076541	-	6031	protein_coding	zinc fingers and homeoboxes 1 [Source:MGI Symbol;Acc:MGI:109271] && sp|P70121|ZHX1_MOUSE Zinc fingers and homeoboxes protein 1 OS=Mus musculus OX=10090 GN=Zhx1 PE=1 SV=2 && PF00046:Homeodomain|PF11569:Homeodomain leucine-zipper encoding, Homez|PF18387:Zinc-fingers and homeoboxes C2H2 finger domain	-
ENSMUSG00000081999	38.337	32.2249	38.5963	20.3089	32.1062	16.5478	36.3861	22.9876	0.65605	0.0650204	0.376903	Gm13461	2	41987473	41988829	-	662	processed_pseudogene	predicted gene 13461 [Source:MGI Symbol;Acc:MGI:3650103] && sp|Q3T054|RAN_BOVIN GTP-binding nuclear protein Ran OS=Bos taurus OX=9913 GN=RAN PE=2 SV=3 && PF00071:Ras family	-
ENSMUSG00000097974	1.06492	0	1.04314	3.38481	1.83464	5.51594	0.702686	3.57846	-2.3504	0.0650353	0.376903	Gm10605	7	99625936	99631711	+	3569	lincRNA	predicted gene 10605 [Source:MGI Symbol;Acc:MGI:3642596] && sp|Q8C013|TPBGL_MOUSE Trophoblast glycoprotein-like OS=Mus musculus OX=10090 GN=Tpbgl PE=1 SV=2 && -	-
ENSMUSG00000020461	3.19475	3.02109	3.12943	7.61582	5.50392	9.92869	3.11509	7.68281	-1.29512	0.0650815	0.376903	Clhc1	11	29547950	29578367	+	2217	protein_coding	clathrin heavy chain linker domain containing 1 [Source:MGI Symbol;Acc:MGI:1920574] && sp|Q5M6W3|CLHC1_MOUSE Clathrin heavy chain linker domain-containing protein 1 OS=Mus musculus OX=10090 GN=Clhc1 PE=2 SV=1 && PF15739:Translin-associated factor X-interacting N-terminus|PF13838:Clathrin-H-link	-
ENSMUSG00000094092	1.06492	2.01406	1.04314	5.92342	0	14.3414	1.37404	6.75496	-2.28251	0.06511	1	Gm15921	5	130208080	130208562	-	483	processed_pseudogene	predicted gene 15921 [Source:MGI Symbol;Acc:MGI:3801933] && sp|P46778|RL21_HUMAN 60S ribosomal protein L21 OS=Homo sapiens OX=9606 GN=RPL21 PE=1 SV=2 && PF01157:Ribosomal protein L21e	-
ENSMUSG00000102775	14.9088	4.02812	4.17257	1.69241	4.5866	0	7.70317	2.093	1.84853	0.0651293	0.376903	Gm38160	3	51482331	51484829	-	2499	TEC	predicted gene, 38160 [Source:MGI Symbol;Acc:MGI:5611388] && sp|O35963|RB33B_MOUSE Ras-related protein Rab-33B OS=Mus musculus OX=10090 GN=Rab33b PE=1 SV=1 && PF00071:Ras family	-
ENSMUSG00000083022	54.3107	50.3515	82.4083	82.9279	91.732	87.1519	62.3568	87.2706	-0.485104	0.0651457	0.376903	Rps15a-ps6	11	6172644	6173036	-	393	processed_pseudogene	ribosomal protein S15A, pseudogene 6 [Source:MGI Symbol;Acc:MGI:3650298] && sp|Q76I82|RS15A_BOVIN 40S ribosomal protein S15a OS=Bos taurus OX=9913 GN=RPS15A PE=2 SV=1 && PF00410:Ribosomal protein S8	-
ENSMUSG00000025482	1.06492	1.00703	1.04314	2.53861	6.42124	3.30956	1.03836	4.08981	-1.97901	0.065188	0.376903	Odf3	7	140847805	140851018	+	2064	protein_coding	outer dense fiber of sperm tails 3 [Source:MGI Symbol;Acc:MGI:1916537] && sp|Q920N1|ODF3A_MOUSE Outer dense fiber protein 3 OS=Mus musculus OX=10090 GN=Odf3 PE=1 SV=2 && -	-
ENSMUSG00000066551	433.421	371.594	431.861	352.02	342.16	323.234	412.292	339.138	0.280956	0.065196	1	Hmgb1	5	149046702	149184489	-	5023	protein_coding	high mobility group box 1 [Source:MGI Symbol;Acc:MGI:96113] && sp|P63158|HMGB1_MOUSE High mobility group protein B1 OS=Mus musculus OX=10090 GN=Hmgb1 PE=1 SV=2 && PF09011:HMG-box domain|PF00505:HMG (high mobility group) box	-
ENSMUSG00000112540	0	3.02109	7.302	0	0.91732	0	3.44103	0.305773	3.33917	0.0652282	1	Gm47461	10	119018346	119021670	-	1813	lincRNA	predicted gene, 47461 [Source:MGI Symbol;Acc:MGI:6096425] && - && -	-
ENSMUSG00000110256	1.06492	5.03515	11.4746	2.53861	0.91732	1.10319	5.85821	1.51971	1.92626	0.0652353	0.376903	Gm45412	8	23256635	23258909	+	2275	TEC	predicted gene 45412 [Source:MGI Symbol;Acc:MGI:5791248] && sp|Q6AYQ1|GOGA7_RAT Golgin subfamily A member 7 OS=Rattus norvegicus OX=10116 GN=Golga7 PE=2 SV=1 && -	-
ENSMUSG00000102370	1.06492	0	0	1.69241	2.75196	3.30956	0.354972	2.58464	-2.78865	0.0652402	0.376903	Gm37973	3	79610538	79611826	-	1289	TEC	predicted gene, 37973 [Source:MGI Symbol;Acc:MGI:5611201] && - && -	-
ENSMUSG00000044092	70.2844	45.3163	33.3806	74.4658	69.7163	76.12	49.6604	73.4341	-0.56507	0.0652797	1	C130050O18Rik	5	139405280	139415623	+	3180	protein_coding	RIKEN cDNA C130050O18 gene [Source:MGI Symbol;Acc:MGI:2442694] && - && -	-
ENSMUSG00000097204	15.9737	18.1265	16.6903	28.7709	20.181	33.0956	16.9302	27.3492	-0.686997	0.0652848	0.376952	Gm17690	3	96167464	96172416	-	3469	antisense	predicted gene, 17690 [Source:MGI Symbol;Acc:MGI:4937324] && sp|Q3V1L6|MTMRB_MOUSE Myotubularin-related protein 11 OS=Mus musculus OX=10090 GN=Mtmr11 PE=2 SV=1 && -	-
ENSMUSG00000051184	28.7527	21.1476	21.906	32.1557	24.7676	67.2945	23.9354	41.4059	-0.7835	0.0653126	1	Zfp524	7	5014415	5018488	+	1436	protein_coding	zinc finger protein 524 [Source:MGI Symbol;Acc:MGI:1916740] && sp|Q9D0B1|ZN524_MOUSE Zinc finger protein 524 OS=Mus musculus OX=10090 GN=Znf524 PE=2 SV=1 && -	-
ENSMUSG00000004668	53.2458	70.4921	35.4669	39.7715	38.5275	18.7542	53.0682	32.3511	0.706558	0.065332	0.377016	Abca13	11	9191942	9684259	+	19737	protein_coding	ATP-binding cassette, sub-family A (ABC1), member 13 [Source:MGI Symbol;Acc:MGI:2388707] && sp|Q5SSE9|ABCAD_MOUSE ATP-binding cassette sub-family A member 13 OS=Mus musculus OX=10090 GN=Abca13 PE=1 SV=1 && PF12698:ABC-2 family transporter protein|PF00005:ABC transporter	-
ENSMUSG00000066724	30.8825	30.2109	80.322	24.5399	26.6023	30.8893	47.1385	27.3438	0.788014	0.0655081	1	Gm10175	7	23946646	23947290	-	645	transcribed_processed_pseudogene	predicted gene 10175 [Source:MGI Symbol;Acc:MGI:3704287] && sp|P56383|AT5G2_MOUSE ATP synthase F(0) complex subunit C2, mitochondrial OS=Mus musculus OX=10090 GN=Atp5mc2 PE=1 SV=2 && PF00137:ATP synthase subunit C	-
ENSMUSG00000111227	2.12983	6.04218	2.08629	0	0.91732	1.10319	3.41943	0.673503	2.40518	0.065509	1	Gm20149	10	21034304	21048899	-	1667	antisense	predicted gene, 20149 [Source:MGI Symbol;Acc:MGI:5012334] && - && -	-
ENSMUSG00000029193	4.25966	1.00703	1.04314	0	0	0	2.10328	0	3.58718	0.0655127	1	Cckar	5	53697776	53707705	-	3682	protein_coding	cholecystokinin A receptor [Source:MGI Symbol;Acc:MGI:99478] && sp|O08786|CCKAR_MOUSE Cholecystokinin receptor type A OS=Mus musculus OX=10090 GN=Cckar PE=1 SV=1 && PF00001:7 transmembrane receptor (rhodopsin family)	-
ENSMUSG00000094076	4.25966	1.00703	1.04314	0	0	0	2.10328	0	3.58718	0.0655175	0.377877	Gm4767	10	81812186	81826490	+	4725	protein_coding	predicted gene 4767 [Source:MGI Symbol;Acc:MGI:3644409] && sp|E9QAG8|ZN431_MOUSE Zinc finger protein 431 OS=Mus musculus OX=10090 GN=Znf431 PE=1 SV=1 && PF00096:Zinc finger, C2H2 type|PF01352:KRAB box	-
ENSMUSG00000018822	4.25966	1.00703	1.04314	0	0	0	2.10328	0	3.58718	0.065679	1	Sfrp5	19	42197971	42202252	-	1900	protein_coding	secreted frizzled-related sequence protein 5 [Source:MGI Symbol;Acc:MGI:1860298] && sp|Q9WU66|SFRP5_MOUSE Secreted frizzled-related protein 5 OS=Mus musculus OX=10090 GN=Sfrp5 PE=2 SV=1 && PF01759:UNC-6/NTR/C345C module|PF01392:Fz domain	-
ENSMUSG00000106202	1.06492	2.01406	1.04314	3.38481	2.75196	8.82551	1.37404	4.98743	-1.835	0.0656861	1	Gm43727	5	5304356	5307002	-	2647	sense_intronic	predicted gene 43727 [Source:MGI Symbol;Acc:MGI:5663864] && - && -	-
ENSMUSG00000082253	1.06492	0	0	2.53861	1.83464	3.30956	0.354972	2.56094	-2.77776	0.0657575	0.378142	Gm14639	X	56155528	56156393	-	866	processed_pseudogene	predicted gene 14639 [Source:MGI Symbol;Acc:MGI:3641909] && sp|Q3ZBT6|TRA2B_BOVIN Transformer-2 protein homolog beta OS=Bos taurus OX=9913 GN=TRA2B PE=2 SV=1 && PF00076:RNA recognition motif. (a.k.a. RRM, RBD, or RNP domain)	-
ENSMUSG00000113905	0	2.01406	0	4.23101	0.91732	7.72232	0.671353	4.29022	-2.64334	0.0657697	0.378142	Gm48872	13	9557861	9561989	+	4129	TEC	predicted gene, 48872 [Source:MGI Symbol;Acc:MGI:6098620] && sp|Q9Y2E4|DIP2C_HUMAN Disco-interacting protein 2 homolog C OS=Homo sapiens OX=9606 GN=DIP2C PE=1 SV=2 && -	-
ENSMUSG00000047492	0	0	1.04314	2.53861	1.83464	3.30956	0.347714	2.56094	-2.77777	0.0657852	0.378142	Inhbe	10	127348857	127354411	-	5319	protein_coding	inhibin beta-E [Source:MGI Symbol;Acc:MGI:109269] && sp|O08717|INHBE_MOUSE Inhibin beta E chain OS=Mus musculus OX=10090 GN=Inhbe PE=2 SV=2 && PF00019:Transforming growth factor beta like domain	-
novel.95	9.58424	6.04218	9.38829	9.30823	8.25588	41.9212	8.33824	19.8284	-1.23838	0.0658328	0.378142	-	17	37546084	37549674	-	698	-	- && - && -	-
ENSMUSG00000105189	22.3632	15.1054	8.34515	32.1557	26.6023	20.9606	15.2713	26.5729	-0.805462	0.065847	0.378142	Gm7774	5	126025941	126026473	-	533	processed_pseudogene	predicted gene 7774 [Source:MGI Symbol;Acc:MGI:3646056] && sp|Q8VE99|CC115_MOUSE Coiled-coil domain-containing protein 115 OS=Mus musculus OX=10090 GN=Ccdc115 PE=1 SV=1 && -	-
ENSMUSG00000108366	9.58424	16.1125	9.38829	25.3861	18.3464	17.651	11.695	20.4612	-0.809053	0.0658531	0.378142	Gm5586	7	16719116	16719910	-	795	processed_pseudogene	predicted gene 5586 [Source:MGI Symbol;Acc:MGI:3645853] && sp|P97351|RS3A_MOUSE 40S ribosomal protein S3a OS=Mus musculus OX=10090 GN=Rps3a PE=1 SV=3 && PF01015:Ribosomal S3Ae family	-
ENSMUSG00000033826	1.06492	0	2.08629	5.07722	1.83464	6.61913	1.0504	4.51033	-2.10389	0.0658961	0.378142	Dnah8	17	30624354	30875264	+	14583	protein_coding	dynein, axonemal, heavy chain 8 [Source:MGI Symbol;Acc:MGI:107714] && sp|Q91XQ0|DYH8_MOUSE Dynein axonemal heavy chain 8 OS=Mus musculus OX=10090 GN=Dnah8 PE=1 SV=2 && PF08393:Dynein heavy chain, N-terminal region 2|PF12781:ATP-binding dynein motor region|PF17852:Dynein heavy chain AAA lid domain|PF12780:P-loop containing dynein motor region D4|PF12775:P-loop containing dynein motor region|PF0838…	-
ENSMUSG00000104484	0	1.00703	0	2.53861	1.83464	3.30956	0.335677	2.56094	-2.77778	0.0659047	0.378142	Gm33142	8	120685399	120686265	+	867	TEC	predicted gene, 33142 [Source:MGI Symbol;Acc:MGI:5592301] && - && -	-
ENSMUSG00000114177	1.06492	0	0	1.69241	1.83464	4.41275	0.354972	2.6466	-2.81595	0.0659129	0.378142	Gm18362	13	17894855	17895383	+	529	processed_pseudogene	predicted gene, 18362 [Source:MGI Symbol;Acc:MGI:5010547] && sp|P84080|ARF1_BOVIN ADP-ribosylation factor 1 OS=Bos taurus OX=9913 GN=ARF1 PE=1 SV=2 && -	-
ENSMUSG00000064179	7.45441	9.06327	9.38829	3.38481	5.50392	2.20638	8.63532	3.69837	1.20898	0.0659329	1	Tnnt1	7	4504570	4516382	-	2204	protein_coding	troponin T1, skeletal, slow [Source:MGI Symbol;Acc:MGI:1333868] && sp|O88346|TNNT1_MOUSE Troponin T, slow skeletal muscle OS=Mus musculus OX=10090 GN=Tnnt1 PE=2 SV=3 && PF00992:Troponin	-
ENSMUSG00000085886	2.12983	3.02109	2.08629	0	0.91732	0	2.4124	0.305773	2.82719	0.065967	0.378142	D030047H15Rik	7	4126340	4136926	-	2536	antisense	RIKEN cDNA D030047H15 gene [Source:MGI Symbol;Acc:MGI:3698136] && - && -	-
ENSMUSG00000112145	7.45441	9.06327	6.25886	12.693	27.5196	7.72232	7.59218	15.9783	-1.07925	0.0659861	0.378142	Gm6218	12	54622590	54623217	+	628	processed_pseudogene	predicted gene 6218 [Source:MGI Symbol;Acc:MGI:3643171] && sp|P47963|RL13_MOUSE 60S ribosomal protein L13 OS=Mus musculus OX=10090 GN=Rpl13 PE=1 SV=3 && PF01294:Ribosomal protein L13e	-
ENSMUSG00000093979	14.9088	16.1125	10.4314	10.1544	6.42124	1.10319	13.8176	5.89295	1.19926	0.0660199	0.378142	Gm2237	14	19563800	19585135	-	2090	protein_coding	predicted gene 2237 [Source:MGI Symbol;Acc:MGI:3780407] && - && PF04822:Takusan	-
ENSMUSG00000043192	8.51932	6.04218	16.6903	22.8475	16.5118	18.7542	10.4173	19.3711	-0.898674	0.0660865	0.378142	Gm1840	8	5639580	5641011	+	1432	processed_pseudogene	predicted gene 1840 [Source:MGI Symbol;Acc:MGI:3037698] && sp|P06745|G6PI_MOUSE Glucose-6-phosphate isomerase OS=Mus musculus OX=10090 GN=Gpi PE=1 SV=4 && PF00342:Phosphoglucose isomerase	-
ENSMUSG00000065623	1.06492	1.00703	4.17257	0	0	0	2.08151	0	3.57434	0.0660881	0.378142	Gm24762	4	132547104	132547207	-	104	snRNA	predicted gene, 24762 [Source:MGI Symbol;Acc:MGI:5454539] && - && -	-
ENSMUSG00000090799	72.4142	78.5483	65.718	103.237	75.2203	120.248	72.2269	99.5682	-0.460349	0.0661076	0.378142	Klhl33	14	50888582	50897507	-	6300	protein_coding	kelch-like 33 [Source:MGI Symbol;Acc:MGI:3644593] && sp|A6NCF5|KLH33_HUMAN Kelch-like protein 33 OS=Homo sapiens OX=9606 GN=KLHL33 PE=4 SV=2 && PF01344:Kelch motif|PF07707:BTB And C-terminal Kelch|PF00651:BTB/POZ domain	-
ENSMUSG00000093256	2.12983	2.01406	8.34515	0	0	2.20638	4.16301	0.735459	2.61063	0.0661841	1	Gm22933	16	90953795	90953868	+	74	miRNA	predicted gene, 22933 [Source:MGI Symbol;Acc:MGI:5452710] && - && -	-
ENSMUSG00000086290	467.498	393.749	501.752	608.42	521.038	550.491	454.333	559.983	-0.302089	0.0661926	0.378409	Snhg12	4	132308623	132311024	+	2402	lincRNA	small nucleolar RNA host gene 12 [Source:MGI Symbol;Acc:MGI:1916721] && - && -	-
ENSMUSG00000064267	37.272	30.2109	32.3374	46.5411	60.5431	38.6116	33.2735	48.5653	-0.549913	0.0662434	1	Hvcn1	5	122206804	122242297	+	3563	protein_coding	hydrogen voltage-gated channel 1 [Source:MGI Symbol;Acc:MGI:1921346] && sp|Q3U2S8|HVCN1_MOUSE Voltage-gated hydrogen channel 1 OS=Mus musculus OX=10090 GN=Hvcn1 PE=1 SV=2 && -	-
ENSMUSG00000100680	6.38949	5.03515	13.5609	21.1551	8.25588	23.167	8.3285	17.526	-1.0712	0.066246	0.378409	1810044D09Rik	6	91440987	91441755	+	486	lincRNA	RIKEN cDNA 1810044D09 gene [Source:MGI Symbol;Acc:MGI:1917048] && - && -	-
ENSMUSG00000097876	19.1685	11.0773	26.0786	27.9247	30.2716	34.1988	18.7748	30.7984	-0.713555	0.0662646	0.378409	Gm16892	16	57167401	57174413	+	1726	antisense	predicted gene, 16892 [Source:MGI Symbol;Acc:MGI:4439816] && sp|P11369|LORF2_MOUSE LINE-1 retrotransposable element ORF2 protein OS=Mus musculus OX=10090 GN=Pol PE=1 SV=2 && PF15140:Domain of unknown function (DUF4573)	-
ENSMUSG00000105973	4.25966	2.01406	6.25886	0	1.83464	1.10319	4.17753	0.979276	2.11764	0.0662709	1	Gm42881	3	131610437	131613780	-	3344	TEC	predicted gene 42881 [Source:MGI Symbol;Acc:MGI:5663018] && - && -	-
ENSMUSG00000064181	537.782	524.662	506.968	475.566	435.727	375.084	523.137	428.792	0.285628	0.0662996	0.378409	Rab3ip	10	116905784	116950769	-	3175	protein_coding	RAB3A interacting protein [Source:MGI Symbol;Acc:MGI:105933] && sp|Q68EF0|RAB3I_MOUSE Rab-3A-interacting protein OS=Mus musculus OX=10090 GN=Rab3ip PE=1 SV=1 && -	-
ENSMUSG00000051359	1.06492	0	0	5.07722	0.91732	2.20638	0.354972	2.73364	-2.88647	0.0663449	1	Ncald	15	37366175	37792570	-	8581	protein_coding	neurocalcin delta [Source:MGI Symbol;Acc:MGI:1196326] && sp|P61602|NCALD_BOVIN Neurocalcin-delta OS=Bos taurus OX=9913 GN=NCALD PE=1 SV=2 && PF00036:EF hand|PF13499:EF-hand domain pair	-
ENSMUSG00000098513	0	0	0	3.38481	5.50392	0	0	2.96291	-3.96284	0.0663688	0.378543	Mir6399	4	138163209	138163292	+	84	miRNA	microRNA 6399 [Source:MGI Symbol;Acc:MGI:5531049] && - && -	-
ENSMUSG00000095178	0	1.00703	0	2.53861	2.75196	2.20638	0.335677	2.49898	-2.75079	0.0663958	0.378543	Gm22716	5	110677124	110677230	-	107	snRNA	predicted gene, 22716 [Source:MGI Symbol;Acc:MGI:5452493] && - && -	-
ENSMUSG00000105842	0	1.00703	0	5.07722	0.91732	2.20638	0.335677	2.73364	-2.88644	0.0665203	0.379036	Gm43329	3	105766966	105770197	-	3232	sense_intronic	predicted gene 43329 [Source:MGI Symbol;Acc:MGI:5663466] && - && -	-
ENSMUSG00000040078	945.645	814.687	609.196	701.502	579.746	527.324	789.842	602.857	0.389164	0.0665556	0.379036	Ptges3-ps	6	85843980	85844459	+	480	processed_pseudogene	prostaglandin E synthase 3, pseudogene [Source:MGI Symbol;Acc:MGI:3704271] && sp|Q9R0Q7|TEBP_MOUSE Prostaglandin E synthase 3 OS=Mus musculus OX=10090 GN=Ptges3 PE=1 SV=1 && PF04969:CS domain	-
ENSMUSG00000034459	1301.33	1337.34	2363.76	1061.14	1185.18	1370.16	1667.47	1205.49	0.468216	0.066602	0.379036	Ifit1	19	34640871	34650009	+	2656	protein_coding	interferon-induced protein with tetratricopeptide repeats 1 [Source:MGI Symbol;Acc:MGI:99450] && sp|Q64282|IFIT1_MOUSE Interferon-induced protein with tetratricopeptide repeats 1 OS=Mus musculus OX=10090 GN=Ifit1 PE=1 SV=2 && -	-
ENSMUSG00000109913	3.19475	2.01406	6.25886	0.846203	0.91732	1.10319	3.82255	0.95557	2.00889	0.0666276	0.379036	Gm30694	1	157118948	157134399	+	1230	unitary_pseudogene	predicted gene, 30694 [Source:MGI Symbol;Acc:MGI:5589853] && sp|Q6ZU45|CL20A_HUMAN Putative C-type lectin domain family 20 member A OS=Homo sapiens OX=9606 GN=CLEC20A PE=2 SV=2 && PF00059:Lectin C-type domain	-
ENSMUSG00000045886	10.6492	4.02812	10.4314	3.38481	3.66928	3.30956	8.36957	3.45455	1.2723	0.0667035	0.379128	Gm9803	10	43524084	43524646	+	563	protein_coding	predicted gene 9803 [Source:MGI Symbol;Acc:MGI:3704359] && sp|Q9CQV1|TIM16_MOUSE Mitochondrial import inner membrane translocase subunit TIM16 OS=Mus musculus OX=10090 GN=Pam16 PE=1 SV=1 && PF03656:Pam16	-
ENSMUSG00000093674	10243.4	11617.1	11927.3	13260.8	13194.7	13092.6	11262.6	13182.7	-0.227106	0.0667166	0.379128	Rpl41	10	128548114	128549305	-	1168	protein_coding	ribosomal protein L41 [Source:MGI Symbol;Acc:MGI:1915195] && - && -	-
ENSMUSG00000111904	1.06492	1.00703	1.04314	5.92342	9.1732	0	1.03836	5.03221	-2.29072	0.0667435	1	Gm2395	12	54716796	54717219	+	424	processed_pseudogene	predicted gene 2395 [Source:MGI Symbol;Acc:MGI:3780563] && sp|P97825|JUPI1_MOUSE Jupiter microtubule associated homolog 1 OS=Mus musculus OX=10090 GN=Jpt1 PE=1 SV=3 && -	-
ENSMUSG00000022758	1.06492	0	0	9.30823	1.83464	0	0.354972	3.71429	-3.33301	0.0668256	1	P2rx6	16	17561885	17577800	+	3995	protein_coding	purinergic receptor P2X, ligand-gated ion channel, 6 [Source:MGI Symbol;Acc:MGI:1337113] && sp|O54803|P2RX6_MOUSE P2X purinoceptor 6 OS=Mus musculus OX=10090 GN=P2rx6 PE=2 SV=3 && PF00864:ATP P2X receptor	-
ENSMUSG00000083283	51.1159	64.4499	63.6317	28.7709	47.7007	47.4371	59.7325	41.3029	0.538495	0.0668918	0.379817	Gm15361	X	74494379	74494822	-	444	processed_pseudogene	predicted pseudogene 15361 [Source:MGI Symbol;Acc:MGI:3642247] && sp|P61077|UB2D3_HUMAN Ubiquitin-conjugating enzyme E2 D3 OS=Homo sapiens OX=9606 GN=UBE2D3 PE=1 SV=1 && PF00179:Ubiquitin-conjugating enzyme	-
ENSMUSG00000017146	1262.99	1348.41	1360.26	1147.45	1190.68	979.631	1323.89	1105.92	0.259102	0.0668924	1	Brca1	11	101488764	101551955	-	8533	protein_coding	breast cancer 1, early onset [Source:MGI Symbol;Acc:MGI:104537] && sp|P48754|BRCA1_MOUSE Breast cancer type 1 susceptibility protein homolog OS=Mus musculus OX=10090 GN=Brca1 PE=1 SV=3 && PF12820:Serine-rich domain associated with BRCT|PF00097:Zinc finger, C3HC4 type (RING finger)|PF00533:BRCA1 C Terminus (BRCT) domain	-
ENSMUSG00000110299	9.58424	4.02812	1.04314	1.69241	0.91732	1.10319	4.88517	1.23764	1.96678	0.0668989	1	Gm17910	8	88728203	88729040	-	838	processed_pseudogene	predicted gene, 17910 [Source:MGI Symbol;Acc:MGI:5010095] && sp|Q61937|NPM_MOUSE Nucleophosmin OS=Mus musculus OX=10090 GN=Npm1 PE=1 SV=1 && -	-
ENSMUSG00000077737	13.8439	11.0773	12.5177	17.7703	24.7676	19.8574	12.4796	20.7984	-0.737754	0.0668991	1	Snord72	15	5118404	5118484	+	81	snoRNA	small nucleolar RNA, C/D box 72 [Source:MGI Symbol;Acc:MGI:3819555] && - && -	-
ENSMUSG00000064525	0	2.01406	1.04314	8.46203	2.75196	2.20638	1.01907	4.47345	-2.13502	0.0669107	0.379817	Gm26440	14	57697809	57697937	+	129	snoRNA	predicted gene, 26440 [Source:MGI Symbol;Acc:MGI:5456217] && - && -	-
ENSMUSG00000096942	239.606	243.701	315.029	321.557	339.409	336.472	266.112	332.479	-0.321083	0.0670562	0.380068	Rps19-ps6	12	110898114	110898551	+	438	processed_pseudogene	ribosomal protein S19, pseudogene 6 [Source:MGI Symbol;Acc:MGI:5011818] && sp|Q9CZX8|RS19_MOUSE 40S ribosomal protein S19 OS=Mus musculus OX=10090 GN=Rps19 PE=1 SV=3 && PF01090:Ribosomal protein S19e	-
ENSMUSG00000036502	7.45441	1.00703	5.21572	0.846203	0	2.20638	4.55905	1.01753	2.21386	0.0670759	0.380068	Tmem255a	X	38196573	38252439	-	4490	protein_coding	transmembrane protein 255A [Source:MGI Symbol;Acc:MGI:3045722] && sp|Q8BHW5|T255A_MOUSE Transmembrane protein 255A OS=Mus musculus OX=10090 GN=Tmem255a PE=1 SV=1 && -	-
ENSMUSG00000066233	24.4931	25.1757	32.3374	29.6171	34.8582	71.7072	27.3354	45.3942	-0.723473	0.0671345	0.380068	Tmem42	9	123021326	123023705	+	1521	protein_coding	transmembrane protein 42 [Source:MGI Symbol;Acc:MGI:1277176] && sp|Q9CR22|TMM42_MOUSE Transmembrane protein 42 OS=Mus musculus OX=10090 GN=Tmem42 PE=2 SV=1 && -	-
ENSMUSG00000008932	23.4281	10.0703	17.7334	6.76962	8.25588	12.1351	17.0773	9.05353	0.926804	0.0671367	0.380068	Slc1a7	4	107968332	108013532	+	3360	protein_coding	solute carrier family 1 (glutamate transporter), member 7 [Source:MGI Symbol;Acc:MGI:2444087] && sp|Q8JZR4|EAA5_MOUSE Excitatory amino acid transporter 5 OS=Mus musculus OX=10090 GN=Slc1a7 PE=2 SV=1 && PF00375:Sodium:dicarboxylate symporter family	-
ENSMUSG00000097597	1.06492	6.04218	1.04314	0.846203	0	0	2.71675	0.282068	3.00187	0.0671374	0.380068	Gm26674	10	8884637	8886878	+	1446	antisense	predicted gene, 26674 [Source:MGI Symbol;Acc:MGI:5477168] && sp|P59808|SASH1_MOUSE SAM and SH3 domain-containing protein 1 OS=Mus musculus OX=10090 GN=Sash1 PE=1 SV=1 && -	-
ENSMUSG00000113355	1.06492	0	8.34515	0	0	0	3.13669	0	4.16582	0.06725	0.380499	Gm48888	13	9635329	9637089	-	1761	TEC	predicted gene, 48888 [Source:MGI Symbol;Acc:MGI:6098648] && - && -	-
ENSMUSG00000039395	108.621	99.6959	140.824	79.543	107.326	57.3658	116.381	81.4118	0.511949	0.067289	0.380513	Mreg	1	72159442	72212307	-	2284	protein_coding	melanoregulin [Source:MGI Symbol;Acc:MGI:2151839] && sp|Q6NVG5|MREG_MOUSE Melanoregulin OS=Mus musculus OX=10090 GN=Mreg PE=1 SV=1 && PF15812:Melanoregulin	-
ENSMUSG00000108184	2.12983	3.02109	0	5.92342	3.66928	7.72232	1.71697	5.77167	-1.73788	0.0673321	0.380551	Gm44198	6	87533407	87536042	+	2636	TEC	predicted gene, 44198 [Source:MGI Symbol;Acc:MGI:5690590] && - && -	-
ENSMUSG00000083596	568.665	636.443	577.901	544.108	487.097	425.831	594.336	485.679	0.290297	0.0673824	1	Rpl21-ps15	X	151215167	151215649	-	483	processed_pseudogene	ribosomal protein L21, pseudogene 15 [Source:MGI Symbol;Acc:MGI:3705426] && sp|P46778|RL21_HUMAN 60S ribosomal protein L21 OS=Homo sapiens OX=9606 GN=RPL21 PE=1 SV=2 && PF01157:Ribosomal protein L21e	-
ENSMUSG00000054675	18.1036	28.1968	47.9846	19.4627	18.3464	17.651	31.4283	18.4867	0.764511	0.0676007	0.381862	Tmem119	5	113793729	113800516	-	2315	protein_coding	transmembrane protein 119 [Source:MGI Symbol;Acc:MGI:2385228] && sp|Q8R138|TM119_MOUSE Transmembrane protein 119 OS=Mus musculus OX=10090 GN=Tmem119 PE=1 SV=1 && PF15724:TMEM119 family	-
ENSMUSG00000101279	5.32458	3.02109	0	10.1544	5.50392	8.82551	2.78189	8.16129	-1.55599	0.0677317	1	Gm18342	1	85067394	85080236	-	694	unprocessed_pseudogene	predicted gene, 18342 [Source:MGI Symbol;Acc:MGI:5010527] && sp|Q13342|SP140_HUMAN Nuclear body protein SP140 OS=Homo sapiens OX=9606 GN=SP140 PE=1 SV=2 && PF01342:SAND domain	-
ENSMUSG00000103094	1.06492	1.00703	1.04314	1.69241	9.1732	2.20638	1.03836	4.35733	-2.07412	0.0677408	0.382261	Gm37558	3	69119742	69122724	-	2983	TEC	predicted gene, 37558 [Source:MGI Symbol;Acc:MGI:5610786] && - && -	-
ENSMUSG00000027249	0	0	0	0.846203	4.5866	1.10319	0	2.17866	-3.51514	0.0677449	0.382261	F2	2	91625320	91636414	-	4594	protein_coding	coagulation factor II [Source:MGI Symbol;Acc:MGI:88380] && sp|P19221|THRB_MOUSE Prothrombin OS=Mus musculus OX=10090 GN=F2 PE=1 SV=1 && -	-
ENSMUSG00000082457	0	0	0	0.846203	4.5866	1.10319	0	2.17866	-3.51514	0.067804	0.382277	Gm13776	2	91716159	91717419	-	1261	processed_pseudogene	predicted gene 13776 [Source:MGI Symbol;Acc:MGI:3650154] && sp|Q9ESX5|DKC1_MOUSE H/ACA ribonucleoprotein complex subunit DKC1 OS=Mus musculus OX=10090 GN=Dkc1 PE=1 SV=4 && -	-
ENSMUSG00000086898	1.06492	0	0	1.69241	3.66928	2.20638	0.354972	2.52269	-2.76177	0.067821	0.382277	Itpr3os	17	27099658	27101440	-	794	antisense	inositol 1,4,5-triphosphate receptor 3, opposite strand [Source:MGI Symbol;Acc:MGI:3704472] && sp|P70227|ITPR3_MOUSE Inositol 1,4,5-trisphosphate receptor type 3 OS=Mus musculus OX=10090 GN=Itpr3 PE=1 SV=3 && -	-
ENSMUSG00000104548	8.51932	17.1195	32.3374	11.8468	8.25588	8.82551	19.3254	9.64274	0.999201	0.0680034	0.382886	Gm43857	3	152391162	152394240	-	3079	TEC	predicted gene 43857 [Source:MGI Symbol;Acc:MGI:5663994] && sp|Q8R5K2|UBP33_MOUSE Ubiquitin carboxyl-terminal hydrolase 33 OS=Mus musculus OX=10090 GN=Usp33 PE=1 SV=2 && -	-
ENSMUSG00000100121	0	0	0	0	4.5866	4.41275	0	2.99979	-3.96793	0.068004	0.382886	1700025N23Rik	6	39063878	39067598	-	915	antisense	RIKEN cDNA 1700025N23 gene [Source:MGI Symbol;Acc:MGI:1917236] && - && -	-
ENSMUSG00000073555	23.4281	41.2882	146.04	21.1551	31.1889	49.6435	70.2521	33.9958	1.05132	0.0680392	0.382886	Gm4951	18	60212080	60247820	+	2645	protein_coding	predicted gene 4951 [Source:MGI Symbol;Acc:MGI:3644953] && sp|Q9QZ85|IIGP1_MOUSE Interferon-inducible GTPase 1 OS=Mus musculus OX=10090 GN=Iigp1 PE=1 SV=2 && -	-
ENSMUSG00000090693	2.12983	0	0	3.38481	0.91732	8.82551	0.709944	4.37588	-2.62908	0.0680865	0.382945	Trim43a	9	88580891	88588819	+	1984	protein_coding	tripartite motif-containing 43A [Source:MGI Symbol;Acc:MGI:3645218] && sp|Q3TL54|TR43A_MOUSE Tripartite motif-containing protein 43A OS=Mus musculus OX=10090 GN=Trim43a PE=2 SV=1 && PF00097:Zinc finger, C3HC4 type (RING finger)	-
ENSMUSG00000100672	0	1.00703	0	1.69241	3.66928	2.20638	0.335677	2.52269	-2.76177	0.068181	0.38327	Gm28404	1	105564126	105564578	-	453	sense_intronic	predicted gene 28404 [Source:MGI Symbol;Acc:MGI:5579110] && - && -	-
ENSMUSG00000026620	56.4405	53.3726	94.926	45.6949	50.4526	44.1275	68.2464	46.7584	0.544385	0.0682771	0.383502	Mark1	1	184896789	184999570	-	4356	protein_coding	MAP/microtubule affinity regulating kinase 1 [Source:MGI Symbol;Acc:MGI:2664902] && sp|Q8VHJ5|MARK1_MOUSE Serine/threonine-protein kinase MARK1 OS=Mus musculus OX=10090 GN=Mark1 PE=1 SV=2 && PF02149:Kinase associated domain 1|PF00627:UBA/TS-N domain|PF00069:Protein kinase domain	-
ENSMUSG00000060376	150.153	189.322	159.601	125.238	141.267	126.867	166.359	131.124	0.343643	0.0683219	1	Bckdha	7	25629946	25658981	-	1899	protein_coding	branched chain ketoacid dehydrogenase E1, alpha polypeptide [Source:MGI Symbol;Acc:MGI:107701] && sp|P50136|ODBA_MOUSE 2-oxoisovalerate dehydrogenase subunit alpha, mitochondrial OS=Mus musculus OX=10090 GN=Bckdha PE=1 SV=1 && PF00676:Dehydrogenase E1 component	-
ENSMUSG00000108447	2.12983	2.01406	5.21572	10.1544	6.42124	6.61913	3.11987	7.7316	-1.31685	0.0683851	0.383502	Gm44567	7	34362701	34365331	-	2631	TEC	predicted gene 44567 [Source:MGI Symbol;Acc:MGI:5753143] && - && -	-
ENSMUSG00000113184	10.6492	6.04218	3.12943	13.5392	8.25588	20.9606	6.60692	14.2519	-1.10351	0.0683912	0.383502	AC125351.1	12	81717830	81720052	-	2223	lincRNA	novel transcript && - && -	-
ENSMUSG00000032878	3.19475	0	5.21572	0	0	0	2.80349	0	4.00303	0.068401	0.383502	Ccdc85a	11	28385685	28584324	-	6971	protein_coding	coiled-coil domain containing 85A [Source:MGI Symbol;Acc:MGI:2445069] && sp|Q5SP85|CC85A_MOUSE Coiled-coil domain-containing protein 85A OS=Mus musculus OX=10090 GN=Ccdc85a PE=1 SV=1 && PF10226:CCDC85 family	-
ENSMUSG00000022809	3.19475	0	5.21572	0	0	0	2.80349	0	4.00303	0.0684063	0.383502	Nr1i2	16	38248323	38294824	-	2553	protein_coding	nuclear receptor subfamily 1, group I, member 2 [Source:MGI Symbol;Acc:MGI:1337040] && sp|O54915|NR1I2_MOUSE Nuclear receptor subfamily 1 group I member 2 OS=Mus musculus OX=10090 GN=Nr1i2 PE=1 SV=1 && PF00105:Zinc finger, C4 type (two domains)|PF00104:Ligand-binding domain of nuclear hormone receptor	-
ENSMUSG00000094306	3.19475	0	5.21572	0	0	0	2.80349	0	4.00303	0.0684483	0.383514	Gm24924	18	14647767	14647930	-	164	snRNA	predicted gene, 24924 [Source:MGI Symbol;Acc:MGI:5454701] && - && -	-
ENSMUSG00000038777	88.388	78.5483	97.0123	74.4658	64.2124	59.5722	87.9829	66.0835	0.409193	0.0684902	0.383514	Sema6c	3	95160457	95174024	+	5935	protein_coding	sema domain, transmembrane domain (TM), and cytoplasmic domain, (semaphorin) 6C [Source:MGI Symbol;Acc:MGI:1338032] && sp|Q9WTL3|SEM6C_RAT Semaphorin-6C OS=Rattus norvegicus OX=10116 GN=Sema6c PE=2 SV=1 && -	-
ENSMUSG00000086820	2.12983	3.02109	0	6.76962	9.1732	2.20638	1.71697	6.04973	-1.82303	0.0685288	1	Gm11465	2	165880025	165882056	+	435	antisense	predicted gene 11465 [Source:MGI Symbol;Acc:MGI:3649368] && - && -	-
ENSMUSG00000021263	5.32458	4.02812	8.34515	3.38481	1.83464	0	5.89928	1.73982	1.70561	0.0685621	0.383514	Degs2	12	108678711	108702315	-	2583	protein_coding	delta(4)-desaturase, sphingolipid 2 [Source:MGI Symbol;Acc:MGI:1917309] && sp|Q8R2F2|DEGS2_MOUSE Sphingolipid delta(4)-desaturase/C4-monooxygenase DES2 OS=Mus musculus OX=10090 GN=Degs2 PE=1 SV=1 && -	-
ENSMUSG00000022881	473.887	478.339	423.516	398.561	399.034	323.234	458.581	373.61	0.294402	0.0686013	1	Rfc4	16	23113943	23127737	-	1533	protein_coding	replication factor C (activator 1) 4 [Source:MGI Symbol;Acc:MGI:2146571] && sp|Q99J62|RFC4_MOUSE Replication factor C subunit 4 OS=Mus musculus OX=10090 GN=Rfc4 PE=1 SV=1 && PF08542:Replication factor C C-terminal domain|PF00004:ATPase family associated with various cellular activities (AAA)	-
ENSMUSG00000034584	23.4281	20.1406	19.8197	6.76962	15.5944	14.3414	21.1295	12.2352	0.798655	0.068602	0.383514	Exph5	9	53301670	53377514	+	10519	protein_coding	exophilin 5 [Source:MGI Symbol;Acc:MGI:2443248] && sp|Q0VAV2|EXPH5_MOUSE Exophilin-5 OS=Mus musculus OX=10090 GN=Exph5 PE=1 SV=1 && -	-
ENSMUSG00000078612	12.779	4.02812	3.12943	0.846203	0.91732	4.41275	6.64551	2.05876	1.73829	0.0686405	0.383514	Fyb2	4	104913456	105016863	+	3136	protein_coding	FYN binding protein 2 [Source:MGI Symbol;Acc:MGI:2685466] && sp|A2A995|FYB2_MOUSE FYN-binding protein 2 OS=Mus musculus OX=10090 GN=Fyb2 PE=1 SV=1 && PF14603:Helically-extended SH3 domain	-
ENSMUSG00000097378	5.32458	4.02812	3.12943	14.3854	10.0905	4.41275	4.16071	9.62957	-1.22693	0.0686844	0.383514	B230208H11Rik	10	12916648	12923090	-	1143	lincRNA	RIKEN cDNA B230208H11 gene [Source:MGI Symbol;Acc:MGI:2443719] && - && -	-
ENSMUSG00000000317	9.58424	9.06327	18.7766	13.5392	6.42124	76.12	12.4747	32.0268	-1.35318	0.0686881	0.383514	Bcl6b	11	70224128	70229798	-	3719	protein_coding	B cell CLL/lymphoma 6, member B [Source:MGI Symbol;Acc:MGI:1278332] && sp|O88282|BCL6B_MOUSE B-cell CLL/lymphoma 6 member B protein OS=Mus musculus OX=10090 GN=Bcl6b PE=1 SV=1 && -	-
ENSMUSG00000087088	2.12983	5.03515	5.21572	7.61582	8.25588	12.1351	4.1269	9.33559	-1.16484	0.0687125	0.383514	Gm16638	7	83597048	83631880	-	9296	antisense	predicted gene, 16638 [Source:MGI Symbol;Acc:MGI:4439562] && sp|Q7TQ69|TMC3_MOUSE Transmembrane channel-like protein 3 OS=Mus musculus OX=10090 GN=Tmc3 PE=2 SV=1 && -	-
ENSMUSG00000092116	4.25966	3.02109	11.4746	13.5392	13.7598	12.1351	6.25178	13.1447	-1.07588	0.068714	1	Gm10320	13	98489348	98492001	-	527	protein_coding	predicted pseudogene 10320 [Source:MGI Symbol;Acc:MGI:3642323] && sp|P60467|SC61B_CANLF Protein transport protein Sec61 subunit beta OS=Canis lupus familiaris OX=9615 GN=SEC61B PE=1 SV=2 && PF03911:Sec61beta family	-
ENSMUSG00000111817	2.12983	3.02109	6.25886	0	0	2.20638	3.80326	0.735459	2.48673	0.0687396	0.383514	Gm47154	9	14807774	14808040	-	267	processed_pseudogene	predicted gene, 47154 [Source:MGI Symbol;Acc:MGI:6095923] && sp|Q9CQE2|TM223_MOUSE Transmembrane protein 223 OS=Mus musculus OX=10090 GN=Tmem223 PE=2 SV=1 && -	-
ENSMUSG00000081087	34.0773	40.2812	32.3374	51.6184	46.7833	50.7467	35.5653	49.7161	-0.482222	0.068765	1	Rps15a-ps7	2	152185291	152185682	-	392	processed_pseudogene	ribosomal protein S15A, pseudogene 7 [Source:MGI Symbol;Acc:MGI:3650538] && sp|Q76I82|RS15A_BOVIN 40S ribosomal protein S15a OS=Bos taurus OX=9913 GN=RPS15A PE=2 SV=1 && -	-
ENSMUSG00000064288	10.6492	8.05624	13.5609	21.1551	22.0157	13.2383	10.7554	18.803	-0.815149	0.0687741	1	Hist1h4k	13	21750194	21750505	-	312	protein_coding	histone cluster 1, H4k [Source:MGI Symbol;Acc:MGI:2448439] && sp|P62803|H4_BOVIN Histone H4 OS=Bos taurus OX=9913 PE=1 SV=2 && PF15511:Centromere kinetochore component CENP-T histone fold	-
ENSMUSG00000116863	0	3.02109	2.08629	3.38481	2.75196	13.2383	1.70246	6.45834	-1.89731	0.0687881	0.383579	AC121560.1	16	97801128	97801355	+	228	processed_pseudogene	mitochondrial ribosomal protein L30 (Mrpl30) pseudogene && - && -	-
ENSMUSG00000087263	6.38949	5.03515	14.604	2.53861	5.50392	2.20638	8.67622	3.4163	1.33497	0.0689603	1	Gm15726	X	169979047	169985232	-	509	antisense	predicted gene 15726 [Source:MGI Symbol;Acc:MGI:3783169] && sp|O15344|TRI18_HUMAN E3 ubiquitin-protein ligase Midline-1 OS=Homo sapiens OX=9606 GN=MID1 PE=1 SV=1 && -	-
ENSMUSG00000111897	13.8439	14.0984	9.38829	26.2323	27.5196	12.1351	12.4435	21.9623	-0.828751	0.0689611	0.383892	Gm19810	10	79888712	79888962	+	251	processed_pseudogene	predicted gene, 19810 [Source:MGI Symbol;Acc:MGI:5011995] && sp|Q9CQR2|RS21_MOUSE 40S ribosomal protein S21 OS=Mus musculus OX=10090 GN=Rps21 PE=1 SV=1 && -	-
ENSMUSG00000105695	1.06492	0	1.04314	5.07722	2.75196	2.20638	0.702686	3.34518	-2.27672	0.0690238	0.383892	Gm43327	3	126441012	126445066	+	4055	TEC	predicted gene 43327 [Source:MGI Symbol;Acc:MGI:5663464] && - && -	-
ENSMUSG00000055976	3.19475	3.02109	1.04314	0	0.91732	0	2.41966	0.305773	2.83048	0.0690349	1	Cldn23	8	35824712	35826559	-	1848	protein_coding	claudin 23 [Source:MGI Symbol;Acc:MGI:1919158] && sp|Q9D7D7|CLD23_MOUSE Claudin-23 OS=Mus musculus OX=10090 GN=Cldn23 PE=1 SV=1 && PF00822:PMP-22/EMP/MP20/Claudin family	-
ENSMUSG00000020312	12.779	10.0703	5.21572	22.0013	16.5118	13.2383	9.355	17.2504	-0.890635	0.0690784	0.383892	Shc2	10	79618051	79637918	-	5426	protein_coding	SHC (Src homology 2 domain containing) transforming protein 2 [Source:MGI Symbol;Acc:MGI:106180] && sp|Q8BMC3|SHC2_MOUSE SHC-transforming protein 2 OS=Mus musculus OX=10090 GN=Shc2 PE=1 SV=3 && -	-
ENSMUSG00000034863	296.046	302.109	366.143	385.868	366.011	443.482	321.433	398.454	-0.309067	0.0691081	0.383892	Ano8	8	71476019	71485963	-	6847	protein_coding	anoctamin 8 [Source:MGI Symbol;Acc:MGI:2687327] && sp|Q6PB70|ANO8_MOUSE Anoctamin-8 OS=Mus musculus OX=10090 GN=Ano8 PE=1 SV=3 && -	-
ENSMUSG00000086536	3.19475	8.05624	15.6471	20.3089	15.5944	17.651	8.96604	17.8514	-0.993083	0.0691599	1	Gm12264	11	59775286	59780321	-	500	antisense	predicted gene 12264 [Source:MGI Symbol;Acc:MGI:3702404] && - && -	-
ENSMUSG00000110123	1.06492	0	2.08629	2.53861	3.66928	6.61913	1.0504	4.27567	-2.02048	0.0691682	0.383892	Gm18562	13	13323364	13350427	+	915	unprocessed_pseudogene	predicted gene, 18562 [Source:MGI Symbol;Acc:MGI:5010747] && sp|Q8R2E9|ERO1B_MOUSE ERO1-like protein beta OS=Mus musculus OX=10090 GN=Ero1b PE=1 SV=1 && PF04137:Endoplasmic Reticulum Oxidoreductin 1 (ERO1)	-
ENSMUSG00000065422	1.06492	1.00703	12.5177	0	0	2.20638	4.86322	0.735459	2.81659	0.0692037	0.383892	Mir221	X	19146294	19146388	-	95	miRNA	microRNA 221 [Source:MGI Symbol;Acc:MGI:3619066] && - && -	-
ENSMUSG00000085787	86.2581	99.6959	113.703	81.2355	72.4683	75.0168	99.8856	76.2402	0.389091	0.0692194	0.383892	Gm13092	4	150315177	150315436	-	260	processed_pseudogene	predicted gene 13092 [Source:MGI Symbol;Acc:MGI:3649661] && sp|Q3T0Z8|RUXF_BOVIN Small nuclear ribonucleoprotein F OS=Bos taurus OX=9913 GN=SNRPF PE=3 SV=2 && -	-
ENSMUSG00000043085	3.19475	2.01406	4.17257	0.846203	0	1.10319	3.12713	0.649797	2.29558	0.0692201	0.383892	Tmem82	4	141613376	141618633	-	3991	protein_coding	transmembrane protein 82 [Source:MGI Symbol;Acc:MGI:2384869] && sp|Q8R115|TMM82_MOUSE Transmembrane protein 82 OS=Mus musculus OX=10090 GN=Tmem82 PE=1 SV=2 && PF15816:Transmembrane protein 82	-
ENSMUSG00000065878	1.06492	0	0	0.846203	1.83464	5.51594	0.354972	2.73226	-2.85628	0.0692289	0.383892	Snord34	7	45126601	45126670	-	70	snoRNA	small nucleolar RNA, C/D box 34 [Source:MGI Symbol;Acc:MGI:1351325] && - && -	-
ENSMUSG00000114555	0	0	0	1.69241	1.83464	2.20638	0	1.91114	-3.32023	0.0692433	0.383892	Gm48706	13	35798750	35802136	+	3387	TEC	predicted gene, 48706 [Source:MGI Symbol;Acc:MGI:6098347] && - && -	-
ENSMUSG00000060459	0	0	0	1.69241	1.83464	2.20638	0	1.91114	-3.32023	0.0693431	0.383892	Kng2	16	22985854	23029482	-	2734	protein_coding	kininogen 2 [Source:MGI Symbol;Acc:MGI:3027157] && sp|O08677|KNG1_MOUSE Kininogen-1 OS=Mus musculus OX=10090 GN=Kng1 PE=1 SV=1 && PF00031:Cystatin domain	-
ENSMUSG00000000724	4.25966	2.01406	1.04314	0	0	1.10319	2.43895	0.367729	2.83956	0.0694181	0.383892	Cryba1	11	77718615	77725283	-	1594	protein_coding	crystallin, beta A1 [Source:MGI Symbol;Acc:MGI:88518] && sp|P02525|CRBA1_MOUSE Beta-crystallin A1 OS=Mus musculus OX=10090 GN=Cryba1 PE=2 SV=2 && PF00030:Beta/Gamma crystallin	-
ENSMUSG00000058908	4.25966	1.00703	0	4.23101	2.75196	13.2383	1.75556	6.74041	-1.93569	0.0694276	0.383892	Pla2g2a	4	138831857	138835186	+	928	polymorphic_pseudogene	phospholipase A2, group IIA (platelets, synovial fluid) [Source:MGI Symbol;Acc:MGI:104642] && sp|P31482|PA2GA_MOUSE Phospholipase A2, membrane associated OS=Mus musculus OX=10090 GN=Pla2g2a PE=1 SV=3 && PF00068:Phospholipase A2	-
ENSMUSG00000107627	0	5.03515	3.12943	0	0	0	2.72153	0	3.96362	0.0694513	1	Gm19244	6	57617025	57617277	-	253	processed_pseudogene	predicted gene, 19244 [Source:MGI Symbol;Acc:MGI:5011429] && sp|Q2KHT7|RS27_BOVIN 40S ribosomal protein S27 OS=Bos taurus OX=9913 GN=RPS27 PE=3 SV=3 && -	-
ENSMUSG00000114553	0	5.03515	3.12943	0	0	0	2.72153	0	3.96362	0.0695048	0.383892	Gm7644	14	30636160	30654077	+	1092	lincRNA	predicted gene 7644 [Source:MGI Symbol;Acc:MGI:3646878] && - && -	-
ENSMUSG00000085586	13.8439	23.1617	36.51	24.5399	25.685	98.1838	24.5052	49.4695	-1.00689	0.069529	0.383892	Gm11613	11	97644184	97660367	-	1971	processed_transcript	predicted gene 11613 [Source:MGI Symbol;Acc:MGI:3651819] && - && -	-
ENSMUSG00000078604	2.12983	0	1.04314	3.38481	2.75196	6.61913	1.05766	4.25197	-2.00941	0.0695351	0.383892	Gm10961	3	107631322	107633090	+	144	protein_coding	predicted gene 10961 [Source:MGI Symbol;Acc:MGI:3779172] && - && -	-
ENSMUSG00000074884	1821.01	1622.32	2113.41	1350.54	1298.93	1762.89	1852.25	1470.79	0.333016	0.0695597	0.383892	Serf2	2	121449195	121458313	+	5455	protein_coding	small EDRK-rich factor 2 [Source:MGI Symbol;Acc:MGI:1337041] && sp|Q5XK03|SERC4_MOUSE Serine incorporator 4 OS=Mus musculus OX=10090 GN=Serinc4 PE=2 SV=1 && -	-
ENSMUSG00000097839	4.25966	6.04218	4.17257	12.693	12.8425	5.51594	4.8248	10.3505	-1.1112	0.0696114	0.383892	Gm26909	8	22644861	22646286	+	627	lincRNA	predicted gene, 26909 [Source:MGI Symbol;Acc:MGI:5477403] && - && -	-
ENSMUSG00000050334	3.19475	9.06327	4.17257	3.38481	0.91732	0	5.47686	1.43404	1.87602	0.069665	0.383892	C130071C03Rik	13	83721381	83884194	+	5664	lincRNA	RIKEN cDNA C130071C03 gene [Source:MGI Symbol;Acc:MGI:2443574] && - && -	-
ENSMUSG00000064409	0	0	0	4.23101	0	4.41275	0	2.88126	-3.91308	0.0696721	0.383892	n-R5s40	15	79692502	79692625	+	124	rRNA	nuclear encoded rRNA 5S 40 [Source:MGI Symbol;Acc:MGI:4421885] && - && -	-
ENSMUSG00000020684	0	1.00703	0	1.69241	0.91732	5.51594	0.335677	2.70856	-2.84536	0.0696763	0.383892	Rasl10b	11	83409137	83421039	+	4010	protein_coding	RAS-like, family 10, member B [Source:MGI Symbol;Acc:MGI:2685575] && sp|Q5SSG5|RSLAB_MOUSE Ras-like protein family member 10B OS=Mus musculus OX=10090 GN=Rasl10b PE=1 SV=1 && -	-
ENSMUSG00000094248	4.25966	14.0984	1.04314	2.53861	1.83464	1.10319	6.46707	1.82548	1.80937	0.0696773	0.383892	Hist1h2ao	13	21810465	21810944	+	480	protein_coding	histone cluster 1, H2ao [Source:MGI Symbol;Acc:MGI:2448302] && sp|P04908|H2A1B_HUMAN Histone H2A type 1-B/E OS=Homo sapiens OX=9606 GN=H2AC4 PE=1 SV=2 && PF16211:C-terminus of histone H2A|PF00125:Core histone H2A/H2B/H3/H4	-
ENSMUSG00000063019	231.087	242.694	174.205	318.172	354.086	207.399	215.995	293.219	-0.442321	0.0697293	0.383892	Manbal	2	157367594	157396763	+	1107	protein_coding	mannosidase, beta A, lysosomal-like [Source:MGI Symbol;Acc:MGI:1916411] && sp|Q9D8X0|MANBL_MOUSE Protein MANBAL OS=Mus musculus OX=10090 GN=Manbal PE=3 SV=2 && -	-
ENSMUSG00000089854	2.12983	4.02812	1.04314	0	0	1.10319	2.40036	0.367729	2.82136	0.0697324	1	Gm16133	13	63329556	63339961	+	4393	antisense	predicted gene 16133 [Source:MGI Symbol;Acc:MGI:3802155] && sp|P50652|FANCC_MOUSE Fanconi anemia group C protein homolog OS=Mus musculus OX=10090 GN=Fancc PE=2 SV=2 && -	-
ENSMUSG00000090093	30.8825	39.2742	28.1649	18.6165	12.8425	29.7861	32.7739	20.415	0.695511	0.0697587	0.383892	Gm14399	2	175129493	175142012	-	2561	protein_coding	predicted gene 14399 [Source:MGI Symbol;Acc:MGI:3650082] && sp|Q8BZW4|ZN120_MOUSE Zinc finger protein 120 OS=Mus musculus OX=10090 GN=Zfp120 PE=2 SV=1 && PF00096:Zinc finger, C2H2 type|PF01352:KRAB box	-
ENSMUSG00000081809	0	4.02812	2.08629	4.23101	5.50392	9.92869	2.03813	6.55454	-1.6628	0.0697626	1	Gm15539	16	3927606	3928171	+	566	processed_pseudogene	predicted gene 15539 [Source:MGI Symbol;Acc:MGI:3782987] && sp|P51410|RL9_MOUSE 60S ribosomal protein L9 OS=Mus musculus OX=10090 GN=Rpl9 PE=1 SV=2 && -	-
ENSMUSG00000105144	2.12983	8.05624	2.08629	22.0013	14.6771	1.10319	4.09078	12.5939	-1.62691	0.0697651	0.383892	Rpl21-ps11	3	96666503	96666982	-	480	processed_pseudogene	ribosomal protein L21, pseudogene 11 [Source:MGI Symbol;Acc:MGI:3648207] && sp|P46778|RL21_HUMAN 60S ribosomal protein L21 OS=Homo sapiens OX=9606 GN=RPL21 PE=1 SV=2 && PF01157:Ribosomal protein L21e	-
ENSMUSG00000053964	10.6492	13.0914	2.08629	16.0779	22.933	14.3414	8.60894	17.7841	-1.04701	0.0698243	0.384015	Lgals4	7	28833854	28841708	+	2315	protein_coding	lectin, galactose binding, soluble 4 [Source:MGI Symbol;Acc:MGI:107536] && sp|Q8K419|LEG4_MOUSE Galectin-4 OS=Mus musculus OX=10090 GN=Lgals4 PE=1 SV=2 && PF00337:Galactoside-binding lectin	-
ENSMUSG00000097149	1.06492	4.02812	3.12943	5.07722	7.33856	8.82551	2.74082	7.08043	-1.35402	0.069843	1	G630030J09Rik	7	31149528	31152707	+	2135	antisense	RIKEN cDNA G630030J09 gene [Source:MGI Symbol;Acc:MGI:3045288] && - && -	-
ENSMUSG00000050994	0	1.00703	0	8.46203	0	2.20638	0.335677	3.55613	-3.26499	0.0700094	0.38483	Adgb	10	10335703	10472326	-	6192	protein_coding	androglobin [Source:MGI Symbol;Acc:MGI:3605549] && sp|G3UZ78|ADGB_MOUSE Androglobin OS=Mus musculus OX=10090 GN=Adgb PE=1 SV=1 && PF00648:Calpain family cysteine protease	-
ENSMUSG00000115437	3.19475	0	6.25886	0	0	1.10319	3.1512	0.367729	3.20941	0.0701469	1	Gm49314	15	38275400	38276441	-	1042	TEC	predicted gene, 49314 [Source:MGI Symbol;Acc:MGI:6118821] && - && -	-
ENSMUSG00000088494	0	0	0	0.846203	1.83464	3.30956	0	1.9968	-3.37453	0.0701502	1	Gm24399	5	65660806	65660879	+	74	snRNA	predicted gene, 24399 [Source:MGI Symbol;Acc:MGI:5454176] && - && -	-
ENSMUSG00000084780	0	0	0	0.846203	1.83464	3.30956	0	1.9968	-3.37453	0.0702354	0.38572	Gm15350	8	12828335	12833865	-	619	antisense	predicted gene 15350 [Source:MGI Symbol;Acc:MGI:3705181] && sp|P98197|AT11A_MOUSE Phospholipid-transporting ATPase IH OS=Mus musculus OX=10090 GN=Atp11a PE=1 SV=1 && -	-
ENSMUSG00000096156	0	0	0	0.846203	1.83464	3.30956	0	1.9968	-3.37453	0.0702453	0.38572	Gm9242	16	97490047	97491120	+	1074	processed_pseudogene	predicted pseudogene 9242 [Source:MGI Symbol;Acc:MGI:3645172] && sp|P51991|ROA3_HUMAN Heterogeneous nuclear ribonucleoprotein A3 OS=Homo sapiens OX=9606 GN=HNRNPA3 PE=1 SV=2 && PF00076:RNA recognition motif. (a.k.a. RRM, RBD, or RNP domain)	-
ENSMUSG00000101800	28.7527	54.3796	18.7766	14.3854	29.3543	11.0319	33.9696	18.2572	0.89207	0.070278	1	Rnf170-ps	7	26072073	26072931	+	859	processed_pseudogene	ring finger protein 170, pseudogene [Source:MGI Symbol;Acc:MGI:3645710] && sp|Q8CBG9|RN170_MOUSE E3 ubiquitin-protein ligase RNF170 OS=Mus musculus OX=10090 GN=Rnf170 PE=1 SV=1 && PF00097:Zinc finger, C3HC4 type (RING finger)|PF06803:Protein of unknown function (DUF1232)	-
ENSMUSG00000105377	2.12983	5.03515	4.17257	6.76962	12.8425	6.61913	3.77918	8.74375	-1.20906	0.070316	0.38573	Gm43148	5	96936813	96937332	+	520	TEC	predicted gene 43148 [Source:MGI Symbol;Acc:MGI:5663285] && - && -	-
ENSMUSG00000055137	3.19475	7.04921	12.5177	2.53861	4.5866	1.10319	7.58722	2.7428	1.44883	0.0703211	0.38573	Sugct	13	16857472	17695553	-	3429	protein_coding	succinyl-CoA glutarate-CoA transferase [Source:MGI Symbol;Acc:MGI:1923221] && sp|Q7TNE1|SUCHY_MOUSE Succinate--hydroxymethylglutarate CoA-transferase OS=Mus musculus OX=10090 GN=Sugct PE=1 SV=2 && PF02515:CoA-transferase family III	-
ENSMUSG00000104569	1.06492	4.02812	2.08629	0.846203	0	0	2.39311	0.282068	2.8179	0.0703732	1	Gm43054	5	23790702	23791585	+	884	TEC	predicted gene 43054 [Source:MGI Symbol;Acc:MGI:5663191] && - && -	-
ENSMUSG00000117064	2.12983	0	0	0.846203	0.91732	13.2383	0.709944	5.00059	-2.81592	0.070411	0.385749	CT571247.1	17	57115118	57115447	+	330	processed_pseudogene	COP1, E3 ubiquitin ligase (Cop1) pseudogene && sp|Q9R1A8|COP1_MOUSE E3 ubiquitin-protein ligase COP1 OS=Mus musculus OX=10090 GN=Cop1 PE=1 SV=2 && PF13923:Zinc finger, C3HC4 type (RING finger)	-
ENSMUSG00000102526	2.12983	4.02812	3.12943	0	0.91732	1.10319	3.09579	0.673503	2.26181	0.0704127	0.385749	Gm37785	1	185329451	185331858	+	2408	TEC	predicted gene, 37785 [Source:MGI Symbol;Acc:MGI:5611013] && sp|P46935|NEDD4_MOUSE E3 ubiquitin-protein ligase NEDD4 OS=Mus musculus OX=10090 GN=Nedd4 PE=1 SV=3 && -	-
ENSMUSG00000117061	5.32458	6.04218	6.25886	11.0006	9.1732	14.3414	5.8752	11.5051	-0.961937	0.0704356	0.385749	CT030636.2	17	12795746	12800795	-	353	lincRNA	novel transcript && - && -	-
ENSMUSG00000090319	6.38949	1.00703	4.17257	9.30823	10.0905	7.72232	3.85637	9.04036	-1.24044	0.0705133	0.385972	Gm4462	16	20663754	20665056	+	1303	processed_pseudogene	predicted gene 4462 [Source:MGI Symbol;Acc:MGI:3782646] && sp|Q9D8N0|EF1G_MOUSE Elongation factor 1-gamma OS=Mus musculus OX=10090 GN=Eef1g PE=1 SV=3 && PF00043:Glutathione S-transferase, C-terminal domain	-
ENSMUSG00000038379	307.761	287.003	244.096	243.706	235.751	177.613	279.62	219.024	0.350225	0.0705574	0.385973	Ttk	9	83834689	83872389	+	4919	protein_coding	Ttk protein kinase [Source:MGI Symbol;Acc:MGI:1194921] && sp|P35761|TTK_MOUSE Dual specificity protein kinase TTK OS=Mus musculus OX=10090 GN=Ttk PE=1 SV=1 && PF00069:Protein kinase domain	-
ENSMUSG00000097867	3.19475	2.01406	9.38829	9.30823	13.7598	9.92869	4.8657	10.9989	-1.17973	0.0705876	0.385973	Lppos	16	24391612	24393588	-	1603	lincRNA	LIM domain containing preferred translocation partner in lipoma, opposite strand [Source:MGI Symbol;Acc:MGI:1916091] && - && -	-
ENSMUSG00000000782	75.609	51.3585	78.2357	51.6184	55.0392	37.5084	68.4011	48.0553	0.503633	0.0706404	0.386059	Tcf7	11	52252371	52283014	-	2625	protein_coding	transcription factor 7, T cell specific [Source:MGI Symbol;Acc:MGI:98507] && sp|Q00417|TCF7_MOUSE Transcription factor 7 OS=Mus musculus OX=10090 GN=Tcf7 PE=1 SV=2 && PF08347:N-terminal CTNNB1 binding|PF00505:HMG (high mobility group) box	-
ENSMUSG00000044609	8.51932	15.1054	14.604	19.4627	27.5196	17.651	12.7429	21.5444	-0.758315	0.0707243	1	Gm9294	7	42953600	42954388	-	789	processed_pseudogene	predicted pseudogene 9294 [Source:MGI Symbol;Acc:MGI:3648888] && sp|P47961|RS4_CRIGR 40S ribosomal protein S4 OS=Cricetulus griseus OX=10029 GN=RPS4 PE=2 SV=2 && PF08071:RS4NT (NUC023) domain|PF16121:40S ribosomal protein S4 C-terminus|PF00900:Ribosomal family S4e	-
ENSMUSG00000038997	0	0	0	0.846203	0	8.82551	0	3.2239	-4.06654	0.0707277	0.386333	Asb17	3	153844209	153855082	+	2580	protein_coding	ankyrin repeat and SOCS box-containing 17 [Source:MGI Symbol;Acc:MGI:1914022] && sp|Q8VHP9|ASB17_MOUSE Ankyrin repeat and SOCS box protein 17 OS=Mus musculus OX=10090 GN=Asb17 PE=2 SV=1 && PF07525:SOCS box	-
ENSMUSG00000097845	0	0	0	1.69241	0.91732	3.30956	0	1.9731	-3.35928	0.0708391	0.38659	A230020J21Rik	1	191025350	191029781	+	1650	antisense	RIKEN cDNA A230020J21 gene [Source:MGI Symbol;Acc:MGI:3704207] && sp|B2RXV4|FLVC1_MOUSE Feline leukemia virus subgroup C receptor-related protein 1 OS=Mus musculus OX=10090 GN=Flvcr1 PE=2 SV=1 && PF07690:Major Facilitator Superfamily	-
ENSMUSG00000006269	0	0	0	1.69241	0.91732	3.30956	0	1.9731	-3.35928	0.0708489	0.38659	Atp6v1b1	6	83742990	83758855	+	4381	protein_coding	ATPase, H+ transporting, lysosomal V1 subunit B1 [Source:MGI Symbol;Acc:MGI:103285] && sp|Q91YH6|VATB1_MOUSE V-type proton ATPase subunit B, kidney isoform OS=Mus musculus OX=10090 GN=Atp6v1b1 PE=1 SV=1 && PF00006:ATP synthase alpha/beta family, nucleotide-binding domain|PF02874:ATP synthase alpha/beta family, beta-barrel domain	-
ENSMUSG00000097989	0	3.02109	0	2.53861	2.75196	9.92869	1.00703	5.07309	-2.30021	0.0708568	1	Gm4335	15	93196595	93197598	+	1004	processed_pseudogene	predicted gene 4335 [Source:MGI Symbol;Acc:MGI:3782519] && sp|P04797|G3P_RAT Glyceraldehyde-3-phosphate dehydrogenase OS=Rattus norvegicus OX=10116 GN=Gapdh PE=1 SV=3 && -	-
ENSMUSG00000083761	0	0	1.04314	0.846203	6.42124	1.10319	0.347714	2.79021	-2.9119	0.0708674	1	Pgam1-ps1	11	21683308	21684056	-	749	processed_pseudogene	phosphoglycerate mutase 1, pseudogene 1 [Source:MGI Symbol;Acc:MGI:1933119] && sp|Q9DBJ1|PGAM1_MOUSE Phosphoglycerate mutase 1 OS=Mus musculus OX=10090 GN=Pgam1 PE=1 SV=3 && PF00300:Histidine phosphatase superfamily (branch 1)	-
ENSMUSG00000109059	0	1.00703	0	0.846203	6.42124	1.10319	0.335677	2.79021	-2.91189	0.0709579	0.386982	Gm9354	7	51458060	51458527	+	468	processed_pseudogene	predicted gene 9354 [Source:MGI Symbol;Acc:MGI:3647598] && sp|P62983|RS27A_MOUSE Ubiquitin-40S ribosomal protein S27a OS=Mus musculus OX=10090 GN=Rps27a PE=1 SV=2 && -	-
ENSMUSG00000099966	50.051	41.2882	38.5963	69.3886	45.866	68.3977	43.3118	61.2174	-0.498718	0.0709648	1	2810402E24Rik	14	20641009	20644048	+	3040	antisense	RIKEN cDNA 2810402E24 gene [Source:MGI Symbol;Acc:MGI:1913715] && - && -	-
ENSMUSG00000103953	0	2.01406	0	0	2.75196	14.3414	0.671353	5.6978	-3.0579	0.0709931	1	Gm29718	1	136793034	136793510	+	477	processed_pseudogene	predicted gene, 29718 [Source:MGI Symbol;Acc:MGI:5588877] && sp|P22907|HEM3_MOUSE Porphobilinogen deaminase OS=Mus musculus OX=10090 GN=Hmbs PE=1 SV=2 && PF03900:Porphobilinogen deaminase, C-terminal domain	-
ENSMUSG00000074521	12.779	8.05624	7.302	5.92342	3.66928	3.30956	9.37907	4.30075	1.10793	0.0710393	0.387223	Gm14327	2	177897096	177905784	+	1451	protein_coding	predicted gene 14327 [Source:MGI Symbol;Acc:MGI:3652188] && sp|Q8BZW4|ZN120_MOUSE Zinc finger protein 120 OS=Mus musculus OX=10090 GN=Zfp120 PE=2 SV=1 && -	-
ENSMUSG00000026500	3.19475	12.0844	9.38829	13.5392	20.181	14.3414	8.22246	16.0206	-0.958253	0.0710916	0.387235	Cox20	1	178319130	178322693	+	883	protein_coding	cytochrome c oxidase assembly protein 20 [Source:MGI Symbol;Acc:MGI:1913609] && sp|Q9D7J4|COX20_MOUSE Cytochrome c oxidase assembly protein COX20, mitochondrial OS=Mus musculus OX=10090 GN=Cox20 PE=1 SV=1 && -	-
ENSMUSG00000031639	234.281	256.793	237.837	200.55	213.736	183.129	242.97	199.138	0.28598	0.0710999	1	Tlr3	8	45395665	45411080	-	5207	protein_coding	toll-like receptor 3 [Source:MGI Symbol;Acc:MGI:2156367] && sp|Q99MB1|TLR3_MOUSE Toll-like receptor 3 OS=Mus musculus OX=10090 GN=Tlr3 PE=1 SV=2 && PF17968:Toll-like receptor 3 trans-membrane domain|PF01582:TIR domain|PF13855:Leucine rich repeat	-
ENSMUSG00000083567	30.8825	28.1968	31.2943	11.8468	17.4291	27.5797	30.1246	18.9519	0.684143	0.0711158	0.387235	Gm11451	2	162898894	162899523	-	630	processed_pseudogene	predicted gene 11451 [Source:MGI Symbol;Acc:MGI:3705412] && sp|Q9QY80|HACD1_MOUSE Very-long-chain (3R)-3-hydroxyacyl-CoA dehydratase 1 OS=Mus musculus OX=10090 GN=Hacd1 PE=2 SV=1 && PF04387:Protein tyrosine phosphatase-like protein, PTPLA	-
ENSMUSG00000106089	0	3.02109	0	2.53861	0.91732	14.3414	1.00703	5.93246	-2.52943	0.071171	0.387334	Gm9419	3	144727884	144728450	+	567	processed_pseudogene	predicted gene 9419 [Source:MGI Symbol;Acc:MGI:3643978] && sp|O55003|BNIP3_MOUSE BCL2/adenovirus E1B 19 kDa protein-interacting protein 3 OS=Mus musculus OX=10090 GN=Bnip3 PE=1 SV=1 && PF06553:BNIP3	-
ENSMUSG00000103839	17.0386	11.0773	11.4746	19.4627	22.933	22.0638	13.1968	21.4865	-0.703853	0.0712633	0.387454	Gm37607	1	58383512	58386134	-	2623	TEC	predicted gene, 37607 [Source:MGI Symbol;Acc:MGI:5610835] && sp|P11260|LORF1_MOUSE LINE-1 retrotransposable element ORF1 protein OS=Mus musculus OX=10090 GN=Lire1 PE=1 SV=2 && -	-
ENSMUSG00000098196	4.25966	3.02109	5.21572	11.0006	9.1732	6.61913	4.16549	8.93099	-1.1116	0.0712784	0.387454	Gm26964	11	61865475	61867639	+	832	lincRNA	predicted gene, 26964 [Source:MGI Symbol;Acc:MGI:5504079] && - && -	-
ENSMUSG00000091530	3.19475	4.02812	3.12943	7.61582	3.66928	14.3414	3.45076	8.54218	-1.29169	0.0713052	0.387454	Cldn20	17	3532554	3533213	+	660	protein_coding	claudin 20 [Source:MGI Symbol;Acc:MGI:3646757] && sp|P56880|CLD20_HUMAN Claudin-20 OS=Homo sapiens OX=9606 GN=CLDN20 PE=1 SV=1 && PF00822:PMP-22/EMP/MP20/Claudin family	-
ENSMUSG00000081404	2.12983	9.06327	4.17257	0.846203	1.83464	2.20638	5.12189	1.62907	1.6814	0.0713417	0.387454	Gm15694	16	31987178	31987460	-	283	processed_pseudogene	predicted gene 15694 [Source:MGI Symbol;Acc:MGI:3783135] && sp|Q9Z1P6|NDUA7_MOUSE NADH dehydrogenase [ubiquinone] 1 alpha subcomplex subunit 7 OS=Mus musculus OX=10090 GN=Ndufa7 PE=1 SV=3 && -	-
ENSMUSG00000089255	2.12983	1.00703	0	2.53861	8.25588	2.20638	1.04562	4.33362	-2.06233	0.0713634	1	Snora78	17	24719676	24719803	-	128	snoRNA	small nucleolar RNA, H/ACA box 7 [Source:MGI Symbol;Acc:MGI:4360056] && - && -	-
ENSMUSG00000079478	428.096	371.594	324.418	307.172	321.062	283.519	374.702	303.918	0.301316	0.0714209	0.387518	Sssca1	19	5728088	5731732	-	3083	protein_coding	Sjogren syndrome/scleroderma autoantigen 1 [Source:MGI Symbol;Acc:MGI:1913482] && sp|P56873|ZNRD2_MOUSE Protein ZNRD2 OS=Mus musculus OX=10090 GN=Znrd2 PE=1 SV=1 && -	-
ENSMUSG00000115480	4.25966	6.04218	14.604	10.1544	4.5866	51.8498	8.30195	22.197	-1.40974	0.0714279	0.387518	Gm49249	15	8512327	8532794	+	1762	lincRNA	predicted gene, 49249 [Source:MGI Symbol;Acc:MGI:6118719] && sp|Q3UYG8|MACD2_MOUSE ADP-ribose glycohydrolase MACROD2 OS=Mus musculus OX=10090 GN=Macrod2 PE=1 SV=1 && -	-
ENSMUSG00000103162	0	0	1.04314	5.92342	3.66928	0	0.347714	3.19757	-3.11728	0.0714798	0.387598	Gm38147	2	24874532	24876329	-	1798	TEC	predicted gene, 38147 [Source:MGI Symbol;Acc:MGI:5611375] && - && -	-
ENSMUSG00000077167	4.25966	8.05624	3.12943	11.8468	10.0905	9.92869	5.14844	10.622	-1.04255	0.0715881	1	Gm24119	10	91118291	91118536	-	246	snoRNA	predicted gene, 24119 [Source:MGI Symbol;Acc:MGI:5453896] && - && -	-
ENSMUSG00000076269	0	0	0	0.846203	2.75196	2.20638	0	1.93485	-3.33599	0.0716063	0.388082	Mir374b	X	103573060	103573154	-	95	miRNA	microRNA 374b [Source:MGI Symbol;Acc:MGI:3629958] && - && -	-
ENSMUSG00000107165	7.45441	8.05624	12.5177	12.693	13.7598	25.3733	9.34279	17.2754	-0.875336	0.0716971	1	Gm43747	5	74575947	74577276	+	1330	TEC	predicted gene 43747 [Source:MGI Symbol;Acc:MGI:5663884] && - && -	-
ENSMUSG00000110289	10.6492	3.02109	5.21572	3.38481	0.91732	2.20638	6.29532	2.1695	1.52456	0.0717153	1	4930412F12Rik	8	57650889	57652359	-	1471	TEC	RIKEN cDNA 4930412F12 gene [Source:MGI Symbol;Acc:MGI:1922099] && - && -	-
ENSMUSG00000015869	1299.2	1340.36	1349.83	1188.07	1177.84	1056.85	1329.79	1140.92	0.22063	0.0717751	1	Prpsap1	11	116470845	116494202	-	3407	protein_coding	phosphoribosyl pyrophosphate synthetase-associated protein 1 [Source:MGI Symbol;Acc:MGI:1915013] && sp|Q9D0M1|KPRA_MOUSE Phosphoribosyl pyrophosphate synthase-associated protein 1 OS=Mus musculus OX=10090 GN=Prpsap1 PE=1 SV=1 && PF14572:Phosphoribosyl synthetase-associated domain|PF13793:N-terminal domain of ribose phosphate pyrophosphokinase	-
ENSMUSG00000092187	15.9737	9.06327	9.38829	17.7703	22.933	17.651	11.4751	19.4514	-0.765533	0.0717981	0.388743	Gm20457	7	64337550	64345964	-	682	antisense	predicted gene 20457 [Source:MGI Symbol;Acc:MGI:5141922] && sp|Q7TPM9|MTMRA_MOUSE Myotubularin-related protein 10 OS=Mus musculus OX=10090 GN=Mtmr10 PE=1 SV=2 && PF12578:Myotubularin-associated protein	-
ENSMUSG00000083483	6.38949	2.01406	2.08629	8.46203	7.33856	8.82551	3.49661	8.2087	-1.23683	0.071815	0.388743	Gm14044	2	130384883	130385329	-	447	processed_pseudogene	predicted gene 14044 [Source:MGI Symbol;Acc:MGI:3650452] && sp|P14115|RL27A_MOUSE 60S ribosomal protein L27a OS=Mus musculus OX=10090 GN=Rpl27a PE=1 SV=5 && PF00828:Ribosomal proteins 50S-L15, 50S-L18e, 60S-L27A	-
ENSMUSG00000001247	3.19475	4.02812	7.302	11.0006	8.25588	11.0319	4.84162	10.0961	-1.05864	0.0718402	0.388743	Lsr	7	30957770	30973464	-	2172	protein_coding	lipolysis stimulated lipoprotein receptor [Source:MGI Symbol;Acc:MGI:1927471] && sp|Q99KG5|LSR_MOUSE Lipolysis-stimulated lipoprotein receptor OS=Mus musculus OX=10090 GN=Lsr PE=1 SV=1 && PF05624:Lipolysis stimulated receptor (LSR)	-
ENSMUSG00000076258	25910.5	24630.9	15218.4	16511.1	18969.3	14227.8	21919.9	16569.4	0.403709	0.0718887	0.388792	Gm23935	16	11144125	11144181	+	57	miRNA	predicted gene, 23935 [Source:MGI Symbol;Acc:MGI:5453712] && - && -	-
ENSMUSG00000097330	0	1.00703	9.38829	0	0.91732	0	3.46511	0.305773	3.34819	0.0719239	0.388792	Gm26672	18	37746559	37768242	-	6918	processed_transcript	predicted gene, 26672 [Source:MGI Symbol;Acc:MGI:5477166] && sp|Q5DRC1|PCDGA_PANTR Protocadherin gamma-A10 OS=Pan troglodytes OX=9598 GN=PCDHGA10 PE=3 SV=1 && PF08266:Cadherin-like|PF00028:Cadherin domain|PF16492:Cadherin cytoplasmic C-terminal	-
ENSMUSG00000097921	0	1.00703	1.04314	0	7.33856	5.51594	0.683391	4.28483	-2.63265	0.0720597	0.389112	Gm26576	10	66920302	66923599	+	1977	lincRNA	predicted gene, 26576 [Source:MGI Symbol;Acc:MGI:5477070] && - && -	-
ENSMUSG00000043251	24.4931	23.1617	9.38829	25.3861	38.5275	30.8893	19.0143	31.6009	-0.731838	0.0721006	0.389112	Exoc3l	8	105289924	105296101	-	3693	protein_coding	exocyst complex component 3-like [Source:MGI Symbol;Acc:MGI:3041195] && sp|Q8BI71|EX3L1_MOUSE Exocyst complex component 3-like protein OS=Mus musculus OX=10090 GN=Exoc3l1 PE=1 SV=1 && PF06046:Exocyst complex component Sec6	-
ENSMUSG00000072980	242.801	199.392	244.096	225.09	155.027	132.383	228.763	170.833	0.418307	0.0721176	0.389112	Oip5	2	119609512	119618469	-	1778	protein_coding	Opa interacting protein 5 [Source:MGI Symbol;Acc:MGI:1917895] && sp|A2AQ14|MS18B_MOUSE Protein Mis18-beta OS=Mus musculus OX=10090 GN=Oip5 PE=2 SV=1 && -	-
ENSMUSG00000079627	0	0	1.04314	0.846203	4.5866	2.20638	0.347714	2.54639	-2.77313	0.0721189	1	Rhox2h	X	37668989	37673277	-	787	protein_coding	reproductive homeobox 2H [Source:MGI Symbol;Acc:MGI:3713490] && - && PF00046:Homeodomain	-
ENSMUSG00000116505	5.32458	3.02109	3.12943	0	1.83464	1.10319	3.82503	0.979276	1.9912	0.0721647	0.389112	Gm10865	15	78994955	79011041	-	712	antisense	predicted gene 10865 [Source:MGI Symbol;Acc:MGI:3641626] && sp|Q99KW3|TARA_MOUSE TRIO and F-actin-binding protein OS=Mus musculus OX=10090 GN=Triobp PE=1 SV=3 && -	-
ENSMUSG00000022306	798.687	795.553	904.405	791.199	665.975	461.133	832.882	639.436	0.380347	0.0721698	0.389112	Zfpm2	15	40655035	41104592	+	9536	protein_coding	zinc finger protein, multitype 2 [Source:MGI Symbol;Acc:MGI:1334444] && sp|Q8CCH7|FOG2_MOUSE Zinc finger protein ZFPM2 OS=Mus musculus OX=10090 GN=Zfpm2 PE=1 SV=2 && -	-
novel.120	20.2334	20.1406	15.6471	10.1544	15.5944	3.30956	18.6737	9.68615	0.929713	0.0723419	0.389178	-	19	59760466	59871574	-	712	-	- && - && -	-
ENSMUSG00000116994	0	0	1.04314	3.38481	2.75196	1.10319	0.347714	2.41332	-2.71102	0.07236	1	AC087802.5	16	17704343	17705100	+	758	processed_pseudogene	ribosomal protein S3A1 (Rps3a1) pseudogene && sp|P97351|RS3A_MOUSE 40S ribosomal protein S3a OS=Mus musculus OX=10090 GN=Rps3a PE=1 SV=3 && -	-
ENSMUSG00000097893	1.06492	3.02109	1.04314	5.07722	4.5866	5.51594	1.70972	5.05992	-1.55405	0.0723624	0.389178	1700034P13Rik	1	9747648	9791924	+	3101	antisense	RIKEN cDNA 1700034P13 gene [Source:MGI Symbol;Acc:MGI:1920581] && sp|Q8CDG3|VCIP1_MOUSE Deubiquitinating protein VCPIP1 OS=Mus musculus OX=10090 GN=Vcpip1 PE=1 SV=1 && -	-
ENSMUSG00000089842	1.06492	5.03515	3.12943	0.846203	0.91732	0	3.0765	0.587841	2.33141	0.0723845	0.389178	Pitpnm2os2	5	124194907	124200346	+	3821	antisense	phosphatidylinositol transfer protein, membrane-associated 2, opposite strand 2 [Source:MGI Symbol;Acc:MGI:3840147] && - && -	-
ENSMUSG00000021127	182.101	170.188	177.334	154.009	144.019	131.279	176.541	143.103	0.300771	0.0723912	0.389178	Zfp36l1	12	80107754	80113013	-	2990	protein_coding	zinc finger protein 36, C3H type-like 1 [Source:MGI Symbol;Acc:MGI:107946] && sp|P23950|TISB_MOUSE mRNA decay activator protein ZFP36L1 OS=Mus musculus OX=10090 GN=Zfp36l1 PE=1 SV=1 && PF00642:Zinc finger C-x8-C-x5-C-x3-H type (and similar)|PF04553:Tis11B like protein, N terminus	-
ENSMUSG00000025436	163.997	148.033	153.342	130.315	131.177	111.422	155.124	124.305	0.317031	0.0723961	0.389178	Atp23	10	126868427	126901355	-	4211	protein_coding	ATP23 metallopeptidase and ATP synthase assembly factor homolog [Source:MGI Symbol;Acc:MGI:1916984] && sp|Q9CWQ3|ATP23_MOUSE Mitochondrial inner membrane protease ATP23 homolog OS=Mus musculus OX=10090 GN=Atp23 PE=1 SV=1 && PF09768:Peptidase M76 family	-
ENSMUSG00000031098	29.8176	30.2109	33.3806	25.3861	41.2794	94.8742	31.1364	53.8466	-0.783023	0.072426	0.389178	Syt8	7	142434850	142440396	+	1894	protein_coding	synaptotagmin VIII [Source:MGI Symbol;Acc:MGI:1859867] && sp|Q9R0N6|SYT8_MOUSE Synaptotagmin-8 OS=Mus musculus OX=10090 GN=Syt8 PE=1 SV=1 && PF00168:C2 domain	-
ENSMUSG00000050357	29.8176	16.1125	22.9492	32.1557	31.1889	41.9212	22.9598	35.0886	-0.609962	0.0724433	0.389178	Carmil2	8	105686274	105698187	+	5487	protein_coding	capping protein regulator and myosin 1 linker 2 [Source:MGI Symbol;Acc:MGI:2685431] && sp|Q3V3V9|CARL2_MOUSE Capping protein, Arp2/3 and myosin-I linker protein 2 OS=Mus musculus OX=10090 GN=Carmil2 PE=1 SV=2 && PF16000:CARMIL C-terminus|PF13516:Leucine Rich repeat|PF17888:Carmil pleckstrin homology domain	-
ENSMUSG00000042269	0	0	0	0.846203	0.91732	4.41275	0	2.05876	-3.41387	0.0725074	1	Fam92b	8	120166397	120177466	-	1395	protein_coding	family with sequence similarity 92, member B [Source:MGI Symbol;Acc:MGI:3588213] && sp|Q3V2J0|CBAR2_MOUSE CBY1-interacting BAR domain-containing protein 2 OS=Mus musculus OX=10090 GN=Cibar2 PE=2 SV=2 && PF06730:FAM92 protein	-
ENSMUSG00000077621	0	0	0	0.846203	0.91732	4.41275	0	2.05876	-3.41387	0.0725791	0.389706	Gm23772	11	22846868	22846969	+	102	snoRNA	predicted gene, 23772 [Source:MGI Symbol;Acc:MGI:5453549] && - && -	-
ENSMUSG00000101746	6.38949	2.01406	6.25886	5.92342	3.66928	30.8893	4.88747	13.494	-1.45446	0.0726238	0.389745	2310043L19Rik	1	177641542	177642943	-	698	lincRNA	RIKEN cDNA 2310043L19 gene [Source:MGI Symbol;Acc:MGI:1922839] && - && -	-
ENSMUSG00000081885	7.45441	4.02812	7.302	12.693	14.6771	8.82551	6.26151	12.0652	-0.956599	0.0726735	0.389811	Gm13231	4	145641357	145644399	+	2850	processed_pseudogene	predicted gene 13231 [Source:MGI Symbol;Acc:MGI:3649243] && sp|Q91ZW3|SMCA5_MOUSE SWI/SNF-related matrix-associated actin-dependent regulator of chromatin subfamily A member 5 OS=Mus musculus OX=10090 GN=Smarca5 PE=1 SV=1 && -	-
ENSMUSG00000087111	1.06492	2.01406	0	5.92342	2.75196	3.30956	1.02632	3.99498	-1.95946	0.07269	1	Gm11399	11	3142048	3143363	+	324	antisense	predicted gene 11399 [Source:MGI Symbol;Acc:MGI:3650744] && - && -	-
ENSMUSG00000093598	1.06492	0	1.04314	4.23101	4.5866	1.10319	0.702686	3.30693	-2.26299	0.0728142	0.390155	A730085K08Rik	9	122380575	122398801	-	2013	antisense	RIKEN cDNA A730085K08 gene [Source:MGI Symbol;Acc:MGI:3605633] && - && -	-
ENSMUSG00000085408	5.32458	8.05624	15.6471	4.23101	0.91732	6.61913	9.67599	3.92249	1.3231	0.0728373	0.390155	C530005A16Rik	4	116589733	116597630	-	2436	processed_transcript	RIKEN cDNA C530005A16 gene [Source:MGI Symbol;Acc:MGI:3612454] && sp|Q8CE13|CCD17_MOUSE Coiled-coil domain-containing protein 17 OS=Mus musculus OX=10090 GN=Ccdc17 PE=2 SV=1 && -	-
ENSMUSG00000080021	1.06492	10.0703	4.17257	0.846203	2.75196	0	5.10259	1.19939	2.0608	0.0728668	0.390155	Gm5915	8	105660334	105660787	-	454	processed_pseudogene	predicted pseudogene 5915 [Source:MGI Symbol;Acc:MGI:3642938] && sp|Q64119|MYL6_RAT Myosin light polypeptide 6 OS=Rattus norvegicus OX=10116 GN=Myl6 PE=1 SV=3 && -	-
ENSMUSG00000086330	30.8825	23.1617	67.8043	25.3861	17.4291	28.6829	40.6162	23.8327	0.771378	0.072873	1	1700007J10Rik	11	59725917	59740154	-	1298	processed_transcript	RIKEN cDNA 1700007J10 gene [Source:MGI Symbol;Acc:MGI:1916570] && sp|P97434|MPRIP_MOUSE Myosin phosphatase Rho-interacting protein OS=Mus musculus OX=10090 GN=Mprip PE=1 SV=2 && -	-
ENSMUSG00000083392	0	1.00703	1.04314	5.07722	3.66928	1.10319	0.683391	3.28323	-2.27114	0.0728873	0.390155	Gm6335	X	112162554	112163747	+	1194	processed_pseudogene	predicted gene 6335 [Source:MGI Symbol;Acc:MGI:3644202] && sp|P63037|DNJA1_MOUSE DnaJ homolog subfamily A member 1 OS=Mus musculus OX=10090 GN=Dnaja1 PE=1 SV=1 && -	-
ENSMUSG00000080850	7.45441	2.01406	0	0	0.91732	0	3.15616	0.305773	3.21149	0.0729133	1	Gm12439	4	48675156	48675520	+	365	processed_pseudogene	predicted gene 12439 [Source:MGI Symbol;Acc:MGI:3651708] && - && -	-
ENSMUSG00000044716	1.06492	0	0	1.69241	0	8.82551	0.354972	3.50597	-3.22226	0.0729578	1	Dok7	5	35056766	35087839	+	4275	protein_coding	docking protein 7 [Source:MGI Symbol;Acc:MGI:3584043] && sp|Q18PE0|DOK7_MOUSE Protein Dok-7 OS=Mus musculus OX=10090 GN=Dok7 PE=1 SV=1 && PF02174:PTB domain (IRS-1 type)	-
ENSMUSG00000006675	51.1159	54.3796	31.2943	33.0019	36.6928	16.5478	45.5966	28.7475	0.65707	0.0729924	1	P4htm	9	108578862	108597667	-	3890	protein_coding	prolyl 4-hydroxylase, transmembrane (endoplasmic reticulum) [Source:MGI Symbol;Acc:MGI:1921693] && sp|Q8BG58|P4HTM_MOUSE Transmembrane prolyl 4-hydroxylase OS=Mus musculus OX=10090 GN=P4htm PE=1 SV=1 && -	-
ENSMUSG00000104943	4.25966	0	0	4.23101	4.5866	8.82551	1.41989	5.88104	-2.05776	0.0730024	0.390329	Gm42868	3	100497429	100500125	+	2697	sense_intronic	predicted gene 42868 [Source:MGI Symbol;Acc:MGI:5663005] && - && -	-
ENSMUSG00000091639	91.5827	96.6748	56.3297	175.164	163.283	56.2626	81.5291	131.57	-0.69297	0.0730255	0.390329	Gm3756	9	31935446	31936800	-	1355	processed_pseudogene	predicted gene 3756 [Source:MGI Symbol;Acc:MGI:3781931] && sp|P81947|TBA1B_BOVIN Tubulin alpha-1B chain OS=Bos taurus OX=9913 PE=1 SV=2 && -	-
ENSMUSG00000104358	10.6492	23.1617	13.5609	34.6943	24.7676	19.8574	15.7906	26.4398	-0.746719	0.0730544	1	Gm37127	1	34823525	34826560	+	3036	TEC	predicted gene, 37127 [Source:MGI Symbol;Acc:MGI:5610355] && - && -	-
ENSMUSG00000103952	0	0	0	2.53861	0.91732	2.20638	0	1.88743	-3.30473	0.0730555	0.390329	Gm37268	3	41773181	41775794	+	2614	TEC	predicted gene, 37268 [Source:MGI Symbol;Acc:MGI:5610496] && - && -	-
ENSMUSG00000105659	0	0	0	2.53861	0.91732	2.20638	0	1.88743	-3.30473	0.0730697	0.390329	4930509H03Rik	3	104510099	104511313	-	1215	sense_intronic	RIKEN cDNA 4930509H03 gene [Source:MGI Symbol;Acc:MGI:1922357] && - && -	-
ENSMUSG00000111172	0	0	0	2.53861	0.91732	2.20638	0	1.88743	-3.30473	0.0731026	1	Gm39302	9	21318079	21320617	-	636	lincRNA	predicted gene, 39302 [Source:MGI Symbol;Acc:MGI:5622187] && - && -	-
ENSMUSG00000098041	6.38949	5.03515	3.12943	11.0006	6.42124	13.2383	4.85136	10.22	-1.06995	0.0731311	0.39033	Gm26981	7	92729840	92733748	+	3169	lincRNA	predicted gene, 26981 [Source:MGI Symbol;Acc:MGI:5504096] && - && -	-
ENSMUSG00000018698	10.6492	4.02812	3.12943	2.53861	2.75196	0	5.93557	1.76352	1.70525	0.0731448	0.39033	Lhx1	11	84518284	84525535	-	4072	protein_coding	LIM homeobox protein 1 [Source:MGI Symbol;Acc:MGI:99783] && sp|P63008|LHX1_MESAU LIM/homeobox protein Lhx1 OS=Mesocricetus auratus OX=10036 GN=Lhx1 PE=2 SV=1 && PF00046:Homeodomain|PF00412:LIM domain	-
ENSMUSG00000100764	1.06492	0	0	5.92342	0.91732	1.10319	0.354972	2.64798	-2.84755	0.0731872	0.390346	Gm29155	1	43741961	43743895	-	458	antisense	predicted gene 29155 [Source:MGI Symbol;Acc:MGI:5579861] && - && -	-
ENSMUSG00000103114	4.25966	7.04921	10.4314	7.61582	11.9252	26.4765	7.24677	15.3392	-1.06687	0.0732432	0.390346	Gm32200	1	191436340	191465048	-	2385	lincRNA	predicted gene, 32200 [Source:MGI Symbol;Acc:MGI:5591359] && - && -	-
ENSMUSG00000050623	1.06492	4.02812	2.08629	5.92342	12.8425	2.20638	2.39311	6.99076	-1.54977	0.0732602	0.390346	Catsperz	19	6922426	6925380	-	781	protein_coding	cation channel sperm associated auxiliary subunit zeta [Source:MGI Symbol;Acc:MGI:1914327] && sp|Q9CQP8|CTSRZ_MOUSE Cation channel sperm-associated protein subunit zeta OS=Mus musculus OX=10090 GN=Catsperz PE=1 SV=1 && -	-
ENSMUSG00000117250	9.58424	3.02109	3.12943	2.53861	1.83464	0	5.24492	1.45775	1.79323	0.0733214	1	CT025659.2	17	65886420	65889035	+	1068	lincRNA	novel transcript && - && -	-
ENSMUSG00000052372	9.58424	5.03515	0	1.69241	0.91732	0	4.87313	0.869909	2.4358	0.0733362	0.390398	Il1rapl1	X	86740870	88115645	-	9342	protein_coding	interleukin 1 receptor accessory protein-like 1 [Source:MGI Symbol;Acc:MGI:2687319] && sp|P59824|IRPL1_RAT Interleukin-1 receptor accessory protein-like 1 OS=Rattus norvegicus OX=10116 GN=Il1rapl1 PE=2 SV=1 && PF00047:Immunoglobulin domain|PF18452:Immunoglobulin domain|PF01582:TIR domain	-
ENSMUSG00000048174	157.607	150.047	136.652	198.011	186.216	165.478	148.102	183.235	-0.308938	0.0733524	0.390398	Tmem81	1	132506230	132508639	+	2018	protein_coding	transmembrane protein 81 [Source:MGI Symbol;Acc:MGI:1921876] && sp|Q9D5K1|TMM81_MOUSE Transmembrane protein 81 OS=Mus musculus OX=10090 GN=Tmem81 PE=2 SV=1 && -	-
ENSMUSG00000105124	5.32458	3.02109	2.08629	8.46203	7.33856	7.72232	3.47732	7.84097	-1.17792	0.0733822	0.390398	Gm5297	5	72626858	72628028	-	1171	transcribed_processed_pseudogene	predicted gene 5297 [Source:MGI Symbol;Acc:MGI:3646414] && sp|P50580|PA2G4_MOUSE Proliferation-associated protein 2G4 OS=Mus musculus OX=10090 GN=Pa2g4 PE=1 SV=3 && -	-
ENSMUSG00000066538	0	2.01406	1.04314	5.07722	4.5866	2.20638	1.01907	3.95673	-1.95396	0.0734261	0.390432	Gm6254	14	122117938	122119009	+	1072	processed_pseudogene	predicted gene 6254 [Source:MGI Symbol;Acc:MGI:3648838] && sp|P51991|ROA3_HUMAN Heterogeneous nuclear ribonucleoprotein A3 OS=Homo sapiens OX=9606 GN=HNRNPA3 PE=1 SV=2 && PF00076:RNA recognition motif. (a.k.a. RRM, RBD, or RNP domain)	-
ENSMUSG00000026890	67.0897	75.5272	57.3729	60.9266	45.866	33.0956	66.6633	46.6294	0.508333	0.0734822	0.390531	Lhx6	2	36081953	36105408	-	4805	protein_coding	LIM homeobox protein 6 [Source:MGI Symbol;Acc:MGI:1306803] && sp|Q9R1R0|LHX6_MOUSE LIM/homeobox protein Lhx6 OS=Mus musculus OX=10090 GN=Lhx6 PE=1 SV=2 && -	-
ENSMUSG00000116581	3.19475	5.03515	10.4314	8.46203	8.25588	25.3733	6.22044	14.0304	-1.15965	0.0735222	0.390537	AC126280.1	16	30913331	30935629	-	2960	lincRNA	novel transcript && - && -	-
ENSMUSG00000099354	4.25966	3.02109	0	8.46203	5.50392	6.61913	2.42692	6.86169	-1.50319	0.0735583	0.390537	1700124L16Rik	6	83761756	83762865	-	1110	antisense	RIKEN cDNA 1700124L16 gene [Source:MGI Symbol;Acc:MGI:1915184] && - && -	-
ENSMUSG00000097090	30.8825	28.1968	45.8983	46.5411	41.2794	68.3977	34.9926	52.0727	-0.568812	0.07362	0.390666	Gm26724	17	27201032	27203071	+	1650	lincRNA	predicted gene, 26724 [Source:MGI Symbol;Acc:MGI:5477218] && - && -	-
ENSMUSG00000061232	9945.25	11547.6	13817.5	10665.5	9788.73	6903.75	11770.1	9119.34	0.36807	0.0736572	1	H2-K1	17	33996017	34000333	-	2608	protein_coding	histocompatibility 2, K1, K region [Source:MGI Symbol;Acc:MGI:95904] && sp|P01901|HA1B_MOUSE H-2 class I histocompatibility antigen, K-B alpha chain OS=Mus musculus OX=10090 GN=H2-K1 PE=1 SV=1 && PF00129:Class I Histocompatibility antigen, domains alpha 1 and 2|PF07654:Immunoglobulin C1-set domain	-
ENSMUSG00000083116	0	6.04218	5.21572	13.5392	6.42124	9.92869	3.75263	9.96306	-1.404	0.0736686	1	Gm13410	2	24178834	24180317	+	1415	processed_pseudogene	predicted gene 13410 [Source:MGI Symbol;Acc:MGI:3650681] && sp|P54823|DDX6_MOUSE Probable ATP-dependent RNA helicase DDX6 OS=Mus musculus OX=10090 GN=Ddx6 PE=1 SV=1 && -	-
ENSMUSG00000079173	105.427	100.703	172.119	137.085	168.787	227.257	126.083	177.71	-0.49328	0.0737208	0.391001	Zan	5	137378637	137477064	-	19813	protein_coding	zonadhesin [Source:MGI Symbol;Acc:MGI:106656] && sp|O88799|ZAN_MOUSE Zonadhesin OS=Mus musculus OX=10090 GN=Zan PE=1 SV=1 && PF00094:von Willebrand factor type D domain|PF01826:Trypsin Inhibitor like cysteine rich domain|PF00629:MAM domain, meprin/A5/mu|PF12714:TILa domain	-
novel.49	34.0773	29.2039	19.8197	19.4627	21.0984	6.61913	27.7003	15.7267	0.802076	0.0737234	1	-	13	5792233	5794391	+	1035	-	- && - && -	-
ENSMUSG00000087064	5.32458	11.0773	8.34515	12.693	13.7598	18.7542	8.24902	15.069	-0.858345	0.0738541	1	Sap30bpos	11	115946450	115952105	-	2352	antisense	SAP30 binding protein, opposite strand [Source:MGI Symbol;Acc:MGI:3650575] && - && -	-
ENSMUSG00000020413	567.6	581.056	591.462	506.029	502.692	484.3	580.039	497.673	0.220656	0.0739425	0.391978	Hus1	11	8993137	9011191	-	6450	protein_coding	HUS1 checkpoint clamp component [Source:MGI Symbol;Acc:MGI:1277962] && sp|Q8BQY8|HUS1_MOUSE Checkpoint protein HUS1 OS=Mus musculus OX=10090 GN=Hus1 PE=2 SV=1 && -	-
ENSMUSG00000035208	457.914	421.945	525.744	372.329	398.117	397.148	468.534	389.198	0.267843	0.07401	0.392136	Slfn8	11	83002158	83020810	-	4091	protein_coding	schlafen 8 [Source:MGI Symbol;Acc:MGI:2672859] && sp|B1ARD8|SLFN8_MOUSE Schlafen family member 8 OS=Mus musculus OX=10090 GN=Slfn8 PE=2 SV=1 && -	-
ENSMUSG00000107647	0	1.00703	1.04314	1.69241	1.83464	6.61913	0.683391	3.38206	-2.27416	0.0741324	1	Gm44445	6	52560552	52563234	+	2683	TEC	predicted gene, 44445 [Source:MGI Symbol;Acc:MGI:5690837] && - && -	-
ENSMUSG00000113113	84.1283	81.5694	70.9337	97.3133	99.0706	105.906	78.8772	100.763	-0.352077	0.0741434	1	Gm2614	12	100744533	100744935	-	403	processed_pseudogene	predicted gene 2614 [Source:MGI Symbol;Acc:MGI:3780782] && sp|P63273|RS17_CANLF 40S ribosomal protein S17 OS=Canis lupus familiaris OX=9615 GN=RPS17 PE=2 SV=2 && -	-
ENSMUSG00000060647	19.1685	10.0703	10.4314	31.3095	24.7676	13.2383	13.2234	23.1051	-0.816636	0.0742204	0.393052	Gm7099	12	9429547	9430100	+	554	processed_pseudogene	predicted gene 7099 [Source:MGI Symbol;Acc:MGI:3646387] && sp|Q9CY34|UB2FA_MOUSE NEDD8-conjugating enzyme UBE2F OS=Mus musculus OX=10090 GN=Ube2f PE=1 SV=1 && -	-
ENSMUSG00000001786	346.098	370.587	367.186	323.249	289.873	297.861	361.29	303.661	0.250262	0.0742579	1	Fbxo7	10	86021972	86051873	+	6180	protein_coding	F-box protein 7 [Source:MGI Symbol;Acc:MGI:1917004] && sp|Q3U7U3|FBX7_MOUSE F-box only protein 7 OS=Mus musculus OX=10090 GN=Fbxo7 PE=1 SV=2 && PF11566:PI31 proteasome regulator N-terminal|PF12937:F-box-like	-
ENSMUSG00000047150	5.32458	5.03515	6.25886	6.76962	3.66928	31.9925	5.53953	14.1438	-1.33773	0.0742761	1	1700001C19Rik	17	47412734	47437376	-	1896	protein_coding	RIKEN cDNA 1700001C19 gene [Source:MGI Symbol;Acc:MGI:1922712] && sp|X6R8D5|GUCNB_HUMAN Putative uncharacterized protein GUCA1ANB OS=Homo sapiens OX=9606 GN=GUCA1ANB PE=5 SV=2 && -	-
ENSMUSG00000029229	842.348	855.975	821.997	677.808	749.451	738.033	840.107	721.764	0.219373	0.0743309	1	Chic2	5	74997988	75044774	-	9750	protein_coding	cysteine-rich hydrophobic domain 2 [Source:MGI Symbol;Acc:MGI:1921527] && sp|Q9D9G3|CHIC2_MOUSE Cysteine-rich hydrophobic domain-containing protein 2 OS=Mus musculus OX=10090 GN=Chic2 PE=2 SV=1 && PF10256:Golgin subfamily A member 7/ERF4 family	-
ENSMUSG00000104903	0	1.00703	0	4.23101	0.91732	2.20638	0.335677	2.45157	-2.72747	0.0743513	0.393545	Gm43707	3	144493986	144497172	-	3187	sense_intronic	predicted gene 43707 [Source:MGI Symbol;Acc:MGI:5663844] && - && -	-
ENSMUSG00000105590	0	1.00703	0	4.23101	0.91732	2.20638	0.335677	2.45157	-2.72747	0.0743875	1	Gm43364	5	108550081	108553354	-	3274	TEC	predicted gene 43364 [Source:MGI Symbol;Acc:MGI:5663501] && - && -	-
ENSMUSG00000086495	3.19475	5.03515	4.17257	0.846203	0.91732	2.20638	4.13416	1.3233	1.68613	0.0744216	0.393611	Gm13778	2	91044092	91053933	-	670	processed_transcript	predicted gene 13778 [Source:MGI Symbol;Acc:MGI:3649233] && - && -	-
ENSMUSG00000097397	11.7141	16.1125	25.0354	29.6171	15.5944	49.6435	17.6207	31.6183	-0.836505	0.0744393	0.393611	Gm16861	16	4935049	4939633	-	1694	antisense	predicted gene, 16861 [Source:MGI Symbol;Acc:MGI:4439785] && sp|Q8VHN8|TIRR_MOUSE Tudor-interacting repair regulator protein OS=Mus musculus OX=10090 GN=Nudt16l1 PE=1 SV=2 && -	-
ENSMUSG00000056018	1.06492	4.02812	4.17257	0.846203	0	1.10319	3.08854	0.649797	2.28055	0.074454	1	Ccdc7b	8	129067134	129183732	+	2272	protein_coding	coiled-coil domain containing 7B [Source:MGI Symbol;Acc:MGI:1922703] && sp|Q9D541|CCDC7_MOUSE Coiled-coil domain-containing protein 7 OS=Mus musculus OX=10090 GN=Ccdc7 PE=2 SV=1 && -	-
ENSMUSG00000031461	26.6229	16.1125	16.6903	15.2316	8.25588	11.0319	19.8086	11.5065	0.776744	0.0745769	1	Myom2	8	15057653	15133541	+	8853	protein_coding	myomesin 2 [Source:MGI Symbol;Acc:MGI:1328358] && sp|P54296|MYOM2_HUMAN Myomesin-2 OS=Homo sapiens OX=9606 GN=MYOM2 PE=1 SV=2 && PF00041:Fibronectin type III domain|PF07679:Immunoglobulin I-set domain	-
ENSMUSG00000107596	0	0	0	1.69241	2.75196	1.10319	0	1.84918	-3.28079	0.0745955	0.394106	Gm18913	6	65432160	65433948	+	1789	processed_pseudogene	predicted gene, 18913 [Source:MGI Symbol;Acc:MGI:5011098] && sp|P54103|DNJC2_MOUSE DnaJ homolog subfamily C member 2 OS=Mus musculus OX=10090 GN=Dnajc2 PE=1 SV=2 && -	-
ENSMUSG00000107950	0	0	0	1.69241	2.75196	1.10319	0	1.84918	-3.28079	0.0746494	0.394106	Gm6375	6	133761445	133763062	-	1145	processed_pseudogene	predicted gene 6375 [Source:MGI Symbol;Acc:MGI:3644303] && sp|P84336|ACTB_CAMDR Actin, cytoplasmic 1 OS=Camelus dromedarius OX=9838 GN=ACTB PE=1 SV=1 && -	-
ENSMUSG00000110411	0	0	0	1.69241	2.75196	1.10319	0	1.84918	-3.28079	0.0746666	0.394106	Gm45457	8	45779228	45782316	+	3089	TEC	predicted gene 45457 [Source:MGI Symbol;Acc:MGI:5791293] && - && -	-
ENSMUSG00000110556	0	0	0	1.69241	2.75196	1.10319	0	1.84918	-3.28079	0.0746842	0.394106	Gm45762	8	95775912	95778530	-	2619	TEC	predicted gene 45762 [Source:MGI Symbol;Acc:MGI:5804877] && - && -	-
ENSMUSG00000116164	0	0	0	1.69241	2.75196	1.10319	0	1.84918	-3.28079	0.0747665	1	1110013H19Rik	15	100613173	100613843	-	671	lincRNA	RIKEN cDNA 1110013H19 gene [Source:MGI Symbol;Acc:MGI:1915772] && - && -	-
ENSMUSG00000083718	15.9737	16.1125	17.7334	10.1544	12.8425	4.41275	16.6065	9.13656	0.844297	0.0747801	0.394412	Ccnb2-ps	8	71916556	71918851	-	2296	transcribed_processed_pseudogene	cyclin B2, pseudogene [Source:MGI Symbol;Acc:MGI:3779896] && sp|P37883|CCNB2_MESAU G2/mitotic-specific cyclin-B2 OS=Mesocricetus auratus OX=10036 GN=CCNB2 PE=2 SV=1 && -	-
ENSMUSG00000112567	9.58424	1.00703	2.08629	12.693	11.0078	7.72232	4.22585	10.4744	-1.32288	0.0747867	1	Gm32899	12	31258651	31258857	-	207	processed_pseudogene	predicted gene, 32899 [Source:MGI Symbol;Acc:MGI:5592058] && sp|P61284|RL12_BOVIN 60S ribosomal protein L12 OS=Bos taurus OX=9913 GN=RPL12 PE=2 SV=1 && -	-
ENSMUSG00000101630	1.06492	0	7.302	0	0	0	2.78897	0	3.99623	0.0748491	0.394419	Gm29261	19	59259512	59261419	-	678	antisense	predicted gene 29261 [Source:MGI Symbol;Acc:MGI:5579967] && sp|Q8BRU6|VMAT2_MOUSE Synaptic vesicular amine transporter OS=Mus musculus OX=10090 GN=Slc18a2 PE=1 SV=1 && -	-
ENSMUSG00000030780	182.101	156.09	195.068	217.474	199.976	247.114	177.753	221.521	-0.316618	0.0748697	0.394419	BC017158	7	128271379	128298170	-	5526	protein_coding	cDNA sequence BC017158 [Source:MGI Symbol;Acc:MGI:2384572] && sp|Q91W34|RUSF1_MOUSE RUS family member 1 OS=Mus musculus OX=10090 GN=Rusf1 PE=1 SV=1 && -	-
ENSMUSG00000072844	6.38949	5.03515	3.12943	8.46203	10.0905	11.0319	4.85136	9.86148	-1.02001	0.074895	0.394419	G530011O06Rik	X	169975043	169978917	-	2380	processed_transcript	RIKEN cDNA G530011O06 gene [Source:MGI Symbol;Acc:MGI:3603513] && - && -	-
ENSMUSG00000070661	0	2.01406	1.04314	5.07722	6.42124	1.10319	1.01907	4.20055	-2.0439	0.0749999	0.394508	Rnf186	4	138967112	138968360	+	1249	protein_coding	ring finger protein 186 [Source:MGI Symbol;Acc:MGI:1914075] && sp|Q9D241|RN186_MOUSE E3 ubiquitin-protein ligase RNF186 OS=Mus musculus OX=10090 GN=Rnf186 PE=2 SV=3 && PF14634:zinc-RING finger domain	-
ENSMUSG00000106484	1.06492	2.01406	1.04314	3.38481	6.42124	3.30956	1.37404	4.37187	-1.66783	0.0750064	0.394508	Gm17833	5	114108926	114109990	+	1065	processed_pseudogene	predicted gene, 17833 [Source:MGI Symbol;Acc:MGI:5010018] && sp|O89017|LGMN_MOUSE Legumain OS=Mus musculus OX=10090 GN=Lgmn PE=1 SV=1 && -	-
ENSMUSG00000096795	20.2334	13.0914	12.5177	8.46203	2.75196	12.1351	15.2808	7.78302	0.986822	0.0750253	0.394508	Zfp433	10	81704825	81726686	+	2771	protein_coding	zinc finger protein 433 [Source:MGI Symbol;Acc:MGI:1920860] && sp|E9QAG8|ZN431_MOUSE Zinc finger protein 431 OS=Mus musculus OX=10090 GN=Znf431 PE=1 SV=1 && PF00096:Zinc finger, C2H2 type|PF01352:KRAB box	-
ENSMUSG00000101013	6.38949	1.00703	1.04314	11.8468	11.0078	2.20638	2.81322	8.35369	-1.58928	0.0750962	0.394681	A630072M18Rik	5	20950989	20956398	+	5410	antisense	RIKEN cDNA A630072M18 gene [Source:MGI Symbol;Acc:MGI:2444702] && sp|Q6PCB5|RSBNL_HUMAN Lysine-specific demethylase RSBN1L OS=Homo sapiens OX=9606 GN=RSBN1L PE=1 SV=2 && -	-
ENSMUSG00000082705	0	4.02812	1.04314	11.0006	3.66928	3.30956	1.69042	5.99316	-1.82325	0.0751378	1	Gm15616	5	72047205	72047579	+	375	processed_pseudogene	predicted gene 15616 [Source:MGI Symbol;Acc:MGI:3783061] && sp|P47962|RL5_MOUSE 60S ribosomal protein L5 OS=Mus musculus OX=10090 GN=Rpl5 PE=1 SV=3 && -	-
ENSMUSG00000108763	3.19475	8.05624	0	0.846203	0.91732	0	3.75033	0.587841	2.62714	0.075195	1	Gm36028	16	37850913	37861146	-	1367	protein_coding	predicted gene, 36028 [Source:MGI Symbol;Acc:MGI:5595187] && sp|Q6UX41|BTNL8_HUMAN Butyrophilin-like protein 8 OS=Homo sapiens OX=9606 GN=BTNL8 PE=1 SV=1 && PF07686:Immunoglobulin V-set domain	-
ENSMUSG00000106205	12.779	11.0773	7.302	5.07722	7.33856	2.20638	10.3861	4.87405	1.07134	0.0752854	0.395336	C230096K16Rik	5	64804014	64805735	+	1722	TEC	RIKEN cDNA C230096K16 gene [Source:MGI Symbol;Acc:MGI:3041194] && - && -	-
ENSMUSG00000095895	0	1.00703	1.04314	8.46203	3.66928	0	0.683391	4.04377	-2.57248	0.0752966	0.395336	Gm21963	13	62778782	62779111	+	330	processed_pseudogene	predicted gene, 21963 [Source:MGI Symbol;Acc:MGI:5439432] && sp|P06302|PTMA_RAT Prothymosin alpha OS=Rattus norvegicus OX=10116 GN=Ptma PE=1 SV=2 && PF03247:Prothymosin/parathymosin family	-
ENSMUSG00000003341	19.1685	15.1054	53.2003	13.5392	15.5944	18.7542	29.1581	15.9626	0.872851	0.0753076	1	Atp8b3	10	80519584	80539124	-	4713	protein_coding	ATPase, class I, type 8B, member 3 [Source:MGI Symbol;Acc:MGI:1914581] && sp|Q6UQ17|AT8B3_MOUSE Phospholipid-transporting ATPase IK OS=Mus musculus OX=10090 GN=Atp8b3 PE=1 SV=1 && PF16209:Phospholipid-translocating ATPase N-terminal|PF16212:Phospholipid-translocating P-type ATPase C-terminal|PF13246:Cation transport ATPase (P-type)|PF00122:E1-E2 ATPase	-
ENSMUSG00000085716	0	1.00703	7.302	0	0	0	2.76968	0	3.98691	0.0755518	1	Gm13388	2	6431786	6436033	-	425	antisense	predicted gene 13388 [Source:MGI Symbol;Acc:MGI:3649903] && - && -	-
ENSMUSG00000097827	0	1.00703	1.04314	2.53861	4.5866	2.20638	0.683391	3.11053	-2.18016	0.0756447	1	5330439K02Rik	15	100459740	100468691	-	2312	bidirectional_promoter_lncRNA	RIKEN cDNA 5330439K02 gene [Source:MGI Symbol;Acc:MGI:1925532] && - && -	-
ENSMUSG00000030739	13.8439	18.1265	14.604	35.5405	23.8503	16.5478	15.5248	25.3129	-0.713617	0.0756576	0.396672	Myh14	7	44605803	44670843	-	7273	protein_coding	myosin, heavy polypeptide 14 [Source:MGI Symbol;Acc:MGI:1919210] && sp|Q6URW6|MYH14_MOUSE Myosin-14 OS=Mus musculus OX=10090 GN=Myh14 PE=1 SV=1 && -	-
ENSMUSG00000091191	5.32458	4.02812	9.38829	3.38481	2.75196	0	6.24699	2.04559	1.56308	0.0756674	0.396672	Gm17334	11	53772281	53773187	-	907	protein_coding	predicted gene, 17334 [Source:MGI Symbol;Acc:MGI:4936968] && sp|Q3SZP0|IRF1_BOVIN Interferon regulatory factor 1 OS=Bos taurus OX=9913 GN=IRF1 PE=2 SV=1 && -	-
ENSMUSG00000055523	5.32458	2.01406	10.4314	10.1544	5.50392	27.5797	5.92336	14.4127	-1.27434	0.0756774	0.396672	Gucy2g	19	55198297	55241236	-	3690	protein_coding	guanylate cyclase 2g [Source:MGI Symbol;Acc:MGI:106025] && sp|Q6TL19|GUC2G_MOUSE Guanylate cyclase 2G OS=Mus musculus OX=10090 GN=Gucy2g PE=1 SV=1 && PF01094:Receptor family ligand binding region|PF07714:Protein tyrosine kinase|PF00211:Adenylate and Guanylate cyclase catalytic domain	-
ENSMUSG00000045725	0	7.04921	2.08629	0	0.91732	0	3.04516	0.305773	3.16556	0.0757344	0.396672	Prr15	6	54325835	54330201	+	3157	protein_coding	proline rich 15 [Source:MGI Symbol;Acc:MGI:1925254] && - && -	-
ENSMUSG00000021213	13.8439	17.1195	26.0786	9.30823	8.25588	15.4446	19.014	11.0029	0.803348	0.0758211	0.396672	Akr1c13	13	4191150	4205596	+	1434	protein_coding	aldo-keto reductase family 1, member C13 [Source:MGI Symbol;Acc:MGI:1351662] && sp|Q8VC28|AK1CD_MOUSE Aldo-keto reductase family 1 member C13 OS=Mus musculus OX=10090 GN=Akr1c13 PE=1 SV=2 && PF00248:Aldo/keto reductase family	-
ENSMUSG00000103000	0	0	0	2.53861	1.83464	1.10319	0	1.82548	-3.26477	0.0758355	0.396672	Gm37900	4	22408291	22412095	+	3805	TEC	predicted gene, 37900 [Source:MGI Symbol;Acc:MGI:5611128] && sp|P11260|LORF1_MOUSE LINE-1 retrotransposable element ORF1 protein OS=Mus musculus OX=10090 GN=Lire1 PE=1 SV=2 && -	-
ENSMUSG00000041712	810.401	836.842	713.51	638.037	690.742	672.945	786.917	667.241	0.238203	0.075838	0.396672	Ubr7	12	102757967	102777707	+	3261	protein_coding	ubiquitin protein ligase E3 component n-recognin 7 (putative) [Source:MGI Symbol;Acc:MGI:1913872] && sp|Q8BU04|UBR7_MOUSE Putative E3 ubiquitin-protein ligase UBR7 OS=Mus musculus OX=10090 GN=Ubr7 PE=1 SV=1 && PF02207:Putative zinc finger in N-recognin (UBR box)	-
ENSMUSG00000020175	41.5317	43.3023	41.7257	34.6943	31.1889	8.82551	42.1866	24.9029	0.748103	0.0758449	1	Rab36	10	75037058	75054748	+	6175	protein_coding	RAB36, member RAS oncogene family [Source:MGI Symbol;Acc:MGI:1924127] && sp|Q8CAM5|RAB36_MOUSE Ras-related protein Rab-36 OS=Mus musculus OX=10090 GN=Rab36 PE=1 SV=1 && -	-
ENSMUSG00000103222	1.06492	0	0	4.23101	1.83464	1.10319	0.354972	2.38961	-2.69878	0.0758557	0.396672	Gm37729	1	160985758	160986929	+	1172	TEC	predicted gene, 37729 [Source:MGI Symbol;Acc:MGI:5610957] && - && -	-
ENSMUSG00000069622	5.32458	8.05624	11.4746	4.23101	4.5866	2.20638	8.28513	3.67466	1.15578	0.0758803	1	Gm10273	10	59395632	59396757	+	1126	protein_coding	predicted pseudogene 10273 [Source:MGI Symbol;Acc:MGI:3704362] && sp|Q9WTQ8|TIM23_MOUSE Mitochondrial import inner membrane translocase subunit Tim23 OS=Mus musculus OX=10090 GN=Timm23 PE=1 SV=1 && PF02466:Tim17/Tim22/Tim23/Pmp24 family	-
ENSMUSG00000017718	60.7002	42.2952	41.7257	83.7741	58.7085	59.5722	48.2404	67.3516	-0.485653	0.0758945	1	Afmid	11	117825924	117839908	+	3539	protein_coding	arylformamidase [Source:MGI Symbol;Acc:MGI:2448704] && sp|Q8K4H1|KFA_MOUSE Kynurenine formamidase OS=Mus musculus OX=10090 GN=Afmid PE=1 SV=1 && -	-
ENSMUSG00000068629	18.1036	25.1757	19.8197	38.0791	31.1889	25.3733	21.033	31.5471	-0.589347	0.0759924	0.396822	Gm6155	7	84834539	84834879	-	341	processed_pseudogene	predicted pseudogene 6155 [Source:MGI Symbol;Acc:MGI:3643981] && sp|Q5E938|EIF1_BOVIN Eukaryotic translation initiation factor 1 OS=Bos taurus OX=9913 GN=EIF1 PE=3 SV=1 && PF01253:Translation initiation factor SUI1	-
ENSMUSG00000098183	12.779	12.0844	16.6903	16.9241	22.0157	28.6829	13.8512	22.5409	-0.694581	0.0759981	0.396822	Gm27010	14	61625926	61627337	-	863	lincRNA	predicted gene, 27010 [Source:MGI Symbol;Acc:MGI:5504125] && - && -	-
ENSMUSG00000050395	3.19475	3.02109	5.21572	0	0.91732	2.20638	3.81052	1.04123	1.94573	0.0759986	0.396822	Tnfsf15	4	63727084	63745113	-	3347	protein_coding	tumor necrosis factor (ligand) superfamily, member 15 [Source:MGI Symbol;Acc:MGI:2180140] && sp|Q5UBV8|TNF15_MOUSE Tumor necrosis factor ligand superfamily member 15 OS=Mus musculus OX=10090 GN=Tnfsf15 PE=2 SV=2 && -	-
ENSMUSG00000086753	102.232	98.6889	107.444	87.1589	83.4762	70.6041	102.788	80.413	0.350599	0.076014	1	Gm15751	5	123508395	123514011	+	1862	sense_overlapping	predicted gene 15751 [Source:MGI Symbol;Acc:MGI:3783193] && sp|Q9NR28|DBLOH_HUMAN Diablo homolog, mitochondrial OS=Homo sapiens OX=9606 GN=DIABLO PE=1 SV=1 && -	-
ENSMUSG00000091996	0	0	3.12943	0.846203	1.83464	15.4446	1.04314	6.04183	-2.5228	0.0760913	0.397107	BC049352	9	45182007	45250020	+	2404	protein_coding	cDNA sequence BC049352 [Source:MGI Symbol;Acc:MGI:3040681] && sp|E9Q2Z6|SIM35_MOUSE Small integral membrane protein 35 OS=Mus musculus OX=10090 GN=SMIM35 PE=3 SV=1 && -	-
ENSMUSG00000083971	2.12983	1.00703	2.08629	0	0	0	1.74105	0	3.31567	0.0761823	0.397383	Gm5943	X	114989150	114989608	+	459	processed_pseudogene	predicted pseudogene 5943 [Source:MGI Symbol;Acc:MGI:3646004] && sp|Q0P5K3|UBE2N_BOVIN Ubiquitin-conjugating enzyme E2 N OS=Bos taurus OX=9913 GN=UBE2N PE=2 SV=1 && PF00179:Ubiquitin-conjugating enzyme	-
ENSMUSG00000028600	2.12983	1.00703	2.08629	0	0	0	1.74105	0	3.31567	0.0762533	0.397422	Podn	4	108014791	108096445	-	4270	protein_coding	podocan [Source:MGI Symbol;Acc:MGI:2674939] && sp|Q7TQ62|PODN_MOUSE Podocan OS=Mus musculus OX=10090 GN=Podn PE=2 SV=1 && -	-
ENSMUSG00000108720	2.12983	1.00703	2.08629	0	0	0	1.74105	0	3.31567	0.0762659	0.397422	Gm44672	7	128744179	128745276	-	1098	antisense	predicted gene 44672 [Source:MGI Symbol;Acc:MGI:5753248] && sp|Q6NZC7|S23IP_MOUSE SEC23-interacting protein OS=Mus musculus OX=10090 GN=Sec23ip PE=1 SV=2 && -	-
ENSMUSG00000035757	234.281	216.511	203.413	192.934	187.133	131.279	218.069	170.449	0.352392	0.0763608	0.397634	Selenoo	15	89089084	89100340	+	3744	protein_coding	selenoprotein O [Source:MGI Symbol;Acc:MGI:1919007] && sp|Q9DBC0|SELO_MOUSE Protein adenylyltransferase SelO, mitochondrial OS=Mus musculus OX=10090 GN=Selenoo PE=1 SV=4 && -	-
ENSMUSG00000078942	115.011	101.71	165.86	168.394	122.004	265.868	127.527	185.422	-0.538168	0.076383	0.397634	Naip6	13	100281121	100317674	-	6827	protein_coding	NLR family, apoptosis inhibitory protein 6 [Source:MGI Symbol;Acc:MGI:1298222] && sp|Q9JIB6|BIR1F_MOUSE Baculoviral IAP repeat-containing protein 1f OS=Mus musculus OX=10090 GN=Naip6 PE=1 SV=2 && -	-
ENSMUSG00000109304	1.06492	1.00703	0	5.92342	2.75196	1.10319	0.690648	3.25952	-2.256	0.076446	0.397703	Gm45112	7	120629762	120634886	-	5125	TEC	predicted gene 45112 [Source:MGI Symbol;Acc:MGI:5753688] && sp|P11369|LORF2_MOUSE LINE-1 retrotransposable element ORF2 protein OS=Mus musculus OX=10090 GN=Pol PE=1 SV=2 && -	-
ENSMUSG00000027318	10.6492	8.05624	14.604	4.23101	3.66928	8.82551	11.1031	5.57527	1.01691	0.0764725	0.397703	Adam33	2	131050591	131063814	-	5394	protein_coding	a disintegrin and metallopeptidase domain 33 [Source:MGI Symbol;Acc:MGI:1341813] && sp|Q923W9|ADA33_MOUSE Disintegrin and metalloproteinase domain-containing protein 33 OS=Mus musculus OX=10090 GN=Adam33 PE=1 SV=3 && -	-
ENSMUSG00000090675	6.38949	6.04218	2.08629	20.3089	6.42124	6.61913	4.83932	11.1164	-1.2107	0.0765715	0.398019	Olfr111	17	37508030	37532449	+	2643	protein_coding	olfactory receptor 111 [Source:MGI Symbol;Acc:MGI:2177494] && sp|Q9UGF6|OR5V1_HUMAN Olfactory receptor 5V1 OS=Homo sapiens OX=9606 GN=OR5V1 PE=2 SV=1 && PF13853:Olfactory receptor	-
ENSMUSG00000076137	4.25966	5.03515	2.08629	6.76962	8.25588	9.92869	3.7937	8.31807	-1.1238	0.0766928	0.39818	Gm26384	17	21284103	21284212	-	110	miRNA	predicted gene, 26384 [Source:MGI Symbol;Acc:MGI:5456161] && - && -	-
ENSMUSG00000108772	11.7141	17.1195	10.4314	38.9253	35.7755	5.51594	13.0883	26.7389	-1.0375	0.0767522	0.39818	Gm6063	6	71641612	71642096	-	485	processed_pseudogene	predicted gene 6063 [Source:MGI Symbol;Acc:MGI:3645395] && sp|P14851|PPIA_CRIGR Peptidyl-prolyl cis-trans isomerase A OS=Cricetulus griseus OX=10029 GN=PPIA PE=2 SV=2 && PF00160:Cyclophilin type peptidyl-prolyl cis-trans isomerase/CLD	-
ENSMUSG00000062132	2.12983	2.01406	1.04314	0	0	0	1.72901	0	3.30728	0.0767545	0.39818	Arhgap33os	7	30515122	30522193	+	2648	antisense	Rho GTPase activating protein 33, opposite strand [Source:MGI Symbol;Acc:MGI:2685928] && sp|Q8IWB6|TEX14_HUMAN Inactive serine/threonine-protein kinase TEX14 OS=Homo sapiens OX=9606 GN=TEX14 PE=1 SV=2 && PF07714:Protein tyrosine kinase	-
ENSMUSG00000113555	3.19475	1.00703	2.08629	10.1544	5.50392	2.20638	2.09602	5.95491	-1.53029	0.0767552	0.39818	Gm10095	12	86845778	86846467	-	483	processed_pseudogene	predicted gene 10095 [Source:MGI Symbol;Acc:MGI:3642130] && sp|P46778|RL21_HUMAN 60S ribosomal protein L21 OS=Homo sapiens OX=9606 GN=RPL21 PE=1 SV=2 && PF01157:Ribosomal protein L21e	-
ENSMUSG00000053714	25.558	29.2039	34.4237	29.6171	45.866	58.469	29.7285	44.6507	-0.579567	0.0768415	0.398429	4732471J01Rik	7	25376819	25566417	+	4332	antisense	RIKEN cDNA 4732471J01 gene [Source:MGI Symbol;Acc:MGI:3603586] && - && -	-
ENSMUSG00000026354	13.8439	3.02109	0	0.846203	1.83464	1.10319	5.62166	1.26134	2.15376	0.0768909	0.398487	Lct	1	128284756	128328318	-	6406	protein_coding	lactase [Source:MGI Symbol;Acc:MGI:104576] && sp|Q02401|LPH_RAT Lactase-phlorizin hydrolase OS=Rattus norvegicus OX=10116 GN=Lct PE=2 SV=2 && PF00232:Glycosyl hydrolase family 1	-
ENSMUSG00000031538	236.411	241.687	216.974	212.397	190.803	109.216	231.691	170.805	0.43677	0.0769608	1	Plat	8	22757727	22782844	+	6241	protein_coding	plasminogen activator, tissue [Source:MGI Symbol;Acc:MGI:97610] && sp|P11214|TPA_MOUSE Tissue-type plasminogen activator OS=Mus musculus OX=10090 GN=Plat PE=1 SV=3 && -	-
ENSMUSG00000068551	13.8439	8.05624	40.6826	9.30823	8.25588	13.2383	20.8609	10.2675	1.02822	0.0770024	0.398866	Zfp467	6	48427697	48445825	-	4255	protein_coding	zinc finger protein 467 [Source:MGI Symbol;Acc:MGI:1916160] && sp|Q8JZL0|ZN467_MOUSE Zinc finger protein 467 OS=Mus musculus OX=10090 GN=Znf467 PE=1 SV=1 && -	-
ENSMUSG00000074166	55.3756	39.2742	57.3729	54.157	70.6337	89.3583	50.6742	71.383	-0.490607	0.0770649	1	AW146154	7	41478874	41499890	-	6093	protein_coding	expressed sequence AW146154 [Source:MGI Symbol;Acc:MGI:2142212] && sp|Q8BZW4|ZN120_MOUSE Zinc finger protein 120 OS=Mus musculus OX=10090 GN=Zfp120 PE=2 SV=1 && PF00096:Zinc finger, C2H2 type|PF01352:KRAB box	-
ENSMUSG00000109282	23.4281	19.1336	17.7334	14.3854	14.6771	4.41275	20.0984	11.1584	0.829366	0.0770854	0.399098	Gm45188	7	98895930	98899545	+	1369	antisense	predicted gene 45188 [Source:MGI Symbol;Acc:MGI:5753764] && - && -	-
ENSMUSG00000060924	1.06492	2.01406	2.08629	0	0	0	1.72175	0	3.30225	0.0771278	1	Csmd1	8	15892537	17535586	-	19030	protein_coding	CUB and Sushi multiple domains 1 [Source:MGI Symbol;Acc:MGI:2137383] && sp|Q923L3|CSMD1_MOUSE CUB and sushi domain-containing protein 1 OS=Mus musculus OX=10090 GN=Csmd1 PE=1 SV=2 && PF00084:Sushi repeat (SCR repeat)|PF00431:CUB domain	-
ENSMUSG00000089847	44.7264	43.3023	32.3374	44.0025	56.8739	69.5009	40.1221	56.7924	-0.496009	0.0771774	1	Timm10b	7	105640056	105643637	+	3582	protein_coding	translocase of inner mitochondrial membrane 10B [Source:MGI Symbol;Acc:MGI:1315196] && sp|Q9WV96|T10B_MOUSE Mitochondrial import inner membrane translocase subunit Tim10 B OS=Mus musculus OX=10090 GN=Timm10b PE=1 SV=1 && -	-
ENSMUSG00000042087	20.2334	31.2179	28.1649	49.0798	37.6101	30.8893	26.5387	39.1931	-0.566753	0.0771903	0.399114	4933440N22Rik	6	117905808	117907760	-	1953	TEC	RIKEN cDNA 4933440N22 gene [Source:MGI Symbol;Acc:MGI:1921721] && - && -	-
ENSMUSG00000116908	63.8949	51.3585	61.5455	66.85	69.7163	108.112	58.933	81.5596	-0.464154	0.0772323	0.399114	AC154232.2	16	36875140	36880234	+	5095	TEC	TEC && - && -	-
novel.76	188.49	193.35	118.918	215.782	190.803	259.249	166.919	221.945	-0.409832	0.0772478	1	-	16	91182930	91197507	+	7808	-	- && - && -	-
ENSMUSG00000089417	3.19475	1.00703	4.17257	3.38481	8.25588	9.92869	2.79145	7.1898	-1.35837	0.0772762	0.399114	Gm22009	3	69085105	69085447	-	343	scaRNA	predicted gene, 22009 [Source:MGI Symbol;Acc:MGI:5451786] && - && -	-
ENSMUSG00000114547	116.076	93.6538	69.8906	81.2355	69.7163	28.6829	93.2067	59.8782	0.632199	0.0772791	0.399114	Gm3226	13	112593743	112595084	-	1342	processed_pseudogene	predicted gene 3226 [Source:MGI Symbol;Acc:MGI:3804968] && sp|P81947|TBA1B_BOVIN Tubulin alpha-1B chain OS=Bos taurus OX=9913 PE=1 SV=2 && -	-
ENSMUSG00000084866	0	5.03515	0	0.846203	9.1732	14.3414	1.67838	8.12028	-2.25573	0.0772996	0.399114	A930006K02Rik	16	91465025	91470128	+	1151	processed_transcript	RIKEN cDNA A930006K02 gene [Source:MGI Symbol;Acc:MGI:1925683] && - && -	-
ENSMUSG00000055897	257.71	253.771	278.519	286.016	304.55	387.219	263.333	325.929	-0.305956	0.0773182	0.399114	Ppp4r1l-ps	2	173579320	173659640	-	12025	transcribed_unprocessed_pseudogene	protein phosphatase 4, regulatory subunit 1-like, pseudogene [Source:MGI Symbol;Acc:MGI:1924560] && sp|Q8VI02|PP4R1_RAT Serine/threonine-protein phosphatase 4 regulatory subunit 1 OS=Rattus norvegicus OX=10116 GN=Ppp4r1 PE=1 SV=1 && -	-
ENSMUSG00000101223	7.45441	4.02812	5.21572	5.07722	6.42124	28.6829	5.56608	13.3938	-1.25264	0.0773618	1	4930568A12Rik	1	34477167	34485933	-	1298	lincRNA	RIKEN cDNA 4930568A12 gene [Source:MGI Symbol;Acc:MGI:1923133] && - && -	-
ENSMUSG00000092260	36.2071	30.2109	50.0709	29.6171	17.4291	29.7861	38.8296	25.6108	0.602072	0.0773773	0.399221	Zfp963	8	69741639	69749970	-	2299	protein_coding	zinc finger protein 963 [Source:MGI Symbol;Acc:MGI:4867078] && sp|Q96BR6|ZN669_HUMAN Zinc finger protein 669 OS=Homo sapiens OX=9606 GN=ZNF669 PE=1 SV=2 && PF01352:KRAB box	-
ENSMUSG00000108799	10.6492	8.05624	6.25886	19.4627	10.0905	15.4446	8.32142	14.9993	-0.853343	0.0774106	1	Glud-ps	7	125075351	125076007	+	657	processed_pseudogene	glutamate dehydrogenase, pseudogene [Source:MGI Symbol;Acc:MGI:95754] && sp|P26443|DHE3_MOUSE Glutamate dehydrogenase 1, mitochondrial OS=Mus musculus OX=10090 GN=Glud1 PE=1 SV=1 && PF00208:Glutamate/Leucine/Phenylalanine/Valine dehydrogenase	-
ENSMUSG00000102258	8.51932	4.02812	21.906	2.53861	2.75196	8.82551	11.4845	4.70536	1.3132	0.0774171	0.399229	Gm38257	2	15056713	15059473	+	2761	TEC	predicted gene, 38257 [Source:MGI Symbol;Acc:MGI:5611485] && - && -	-
ENSMUSG00000057346	3539.78	3589.05	5095.75	3147.87	3721.57	2752.45	4074.86	3207.3	0.345309	0.0774771	1	Apol9a	15	77403789	77411135	-	5953	protein_coding	apolipoprotein L 9a [Source:MGI Symbol;Acc:MGI:3606001] && - && -	-
ENSMUSG00000063754	63.8949	40.2812	57.3729	74.4658	77.9722	66.1913	53.8497	72.8765	-0.439622	0.0776129	1	Gm10136	19	29003408	29003842	-	435	processed_pseudogene	predicted pseudogene 10136 [Source:MGI Symbol;Acc:MGI:3704242] && sp|P61257|RL26_BOVIN 60S ribosomal protein L26 OS=Bos taurus OX=9913 GN=RPL26 PE=2 SV=1 && PF16906:Ribosomal proteins L26 eukaryotic, L24P archaeal|PF00467:KOW motif	-
ENSMUSG00000028669	749.7	757.286	698.906	628.729	676.982	551.594	735.298	619.102	0.247496	0.0776324	0.400141	Pithd1	4	135975460	135987264	-	2477	protein_coding	PITH (C-terminal proteasome-interacting domain of thioredoxin-like) domain containing 1 [Source:MGI Symbol;Acc:MGI:1913443] && sp|Q8BWR2|PITH1_MOUSE PITH domain-containing protein 1 OS=Mus musculus OX=10090 GN=Pithd1 PE=1 SV=1 && PF06201:PITH domain	-
ENSMUSG00000041245	108.621	78.5483	107.444	88.0051	74.3029	50.7467	98.2045	71.0182	0.46162	0.0777635	0.400458	Wnk3	X	151198078	151320152	+	10589	protein_coding	WNK lysine deficient protein kinase 3 [Source:MGI Symbol;Acc:MGI:2652875] && sp|Q80XP9|WNK3_MOUSE Serine/threonine-protein kinase WNK3 OS=Mus musculus OX=10090 GN=Wnk3 PE=1 SV=3 && PF12202:Oxidative-stress-responsive kinase 1 C-terminal domain|PF00069:Protein kinase domain	-
ENSMUSG00000074506	73.4792	24.1687	138.738	181.934	117.417	113.628	78.7953	137.66	-0.806228	0.0777994	0.400458	Gm10705	3	87207545	87208005	-	461	processed_pseudogene	predicted gene 10705 [Source:MGI Symbol;Acc:MGI:3708678] && sp|Q3MHP1|UB2L3_BOVIN Ubiquitin-conjugating enzyme E2 L3 OS=Bos taurus OX=9913 GN=UBE2L3 PE=2 SV=1 && PF00179:Ubiquitin-conjugating enzyme	-
ENSMUSG00000084013	87.3231	62.4358	158.558	49.926	59.6258	90.4614	102.772	66.6711	0.627793	0.0778438	0.400458	Gm14270	2	170285035	170285880	+	846	processed_pseudogene	predicted gene 14270 [Source:MGI Symbol;Acc:MGI:3649849] && sp|O35387|HAX1_MOUSE HCLS1-associated protein X-1 OS=Mus musculus OX=10090 GN=Hax1 PE=1 SV=1 && -	-
ENSMUSG00000117239	0	0	1.04314	0.846203	0	9.92869	0.347714	3.59163	-3.25622	0.0778475	0.400458	AC166110.3	17	13341241	13345880	-	4640	transcribed_processed_pseudogene	G protein-coupled receptor 31, D17Leh66b region (Gpr31b) pseudogene && sp|F8VQN3|GPR31_MOUSE 12-(S)-hydroxy-5,8,10,14-eicosatetraenoic acid receptor OS=Mus musculus OX=10090 GN=Gpr31 PE=3 SV=1 && -	-
ENSMUSG00000060429	1.06492	0	0	1.69241	1.83464	3.30956	0.354972	2.27887	-2.60405	0.0779646	0.400862	Sntb1	15	55636388	55906949	-	5324	protein_coding	syntrophin, basic 1 [Source:MGI Symbol;Acc:MGI:101781] && sp|Q99L88|SNTB1_MOUSE Beta-1-syntrophin OS=Mus musculus OX=10090 GN=Sntb1 PE=1 SV=4 && PF18012:PH domain|PF00595:PDZ domain|PF00169:PH domain	-
ENSMUSG00000081603	413.187	388.713	478.803	477.258	504.526	564.832	426.901	515.539	-0.27154	0.0780738	1	Gm14681	X	66778442	66778852	-	411	processed_pseudogene	predicted gene 14681 [Source:MGI Symbol;Acc:MGI:3705734] && sp|Q3T160|NPM_BOVIN Nucleophosmin OS=Bos taurus OX=9913 GN=NPM1 PE=2 SV=1 && PF16276:Nucleophosmin C-terminal domain	-
ENSMUSG00000098062	4.25966	11.0773	1.04314	9.30823	13.7598	14.3414	5.46004	12.4698	-1.18192	0.0781673	0.40152	Gm26931	5	34481914	34482522	-	609	processed_pseudogene	predicted gene, 26931 [Source:MGI Symbol;Acc:MGI:5504046] && sp|P16858|G3P_MOUSE Glyceraldehyde-3-phosphate dehydrogenase OS=Mus musculus OX=10090 GN=Gapdh PE=1 SV=2 && PF02800:Glyceraldehyde 3-phosphate dehydrogenase, C-terminal domain	-
ENSMUSG00000072789	35.1422	28.1968	45.8983	49.926	58.7085	45.2307	36.4124	51.2884	-0.497096	0.0781697	0.40152	Gm10420	6	122696001	122696882	+	882	processed_pseudogene	predicted gene 10420 [Source:MGI Symbol;Acc:MGI:3704275] && sp|P25444|RS2_MOUSE 40S ribosomal protein S2 OS=Mus musculus OX=10090 GN=Rps2 PE=1 SV=3 && PF03719:Ribosomal protein S5, C-terminal domain|PF00333:Ribosomal protein S5, N-terminal domain	-
ENSMUSG00000011305	3.19475	2.01406	0	4.23101	7.33856	4.41275	1.73627	5.32744	-1.62185	0.0781797	1	Plin5	17	56111601	56117596	-	2087	protein_coding	perilipin 5 [Source:MGI Symbol;Acc:MGI:1914218] && sp|Q8BVZ1|PLIN5_MOUSE Perilipin-5 OS=Mus musculus OX=10090 GN=Plin5 PE=1 SV=1 && PF03036:Perilipin family	-
ENSMUSG00000041566	17.0386	12.0844	4.17257	7.61582	4.5866	2.20638	11.0985	4.80293	1.18526	0.0783072	0.402028	Tssk1	16	17894223	17897922	+	3700	protein_coding	testis-specific serine kinase 1 [Source:MGI Symbol;Acc:MGI:1347557] && sp|Q61241|TSSK1_MOUSE Testis-specific serine/threonine-protein kinase 1 OS=Mus musculus OX=10090 GN=Tssk1b PE=1 SV=2 && -	-
ENSMUSG00000082765	0	1.00703	0	1.69241	1.83464	3.30956	0.335677	2.27887	-2.6041	0.0783529	0.402065	Gm14411	2	177125463	177127709	-	914	unprocessed_pseudogene	predicted gene 14411 [Source:MGI Symbol;Acc:MGI:3649821] && sp|Q8BZW4|ZN120_MOUSE Zinc finger protein 120 OS=Mus musculus OX=10090 GN=Zfp120 PE=2 SV=1 && PF00096:Zinc finger, C2H2 type|PF01352:KRAB box	-
ENSMUSG00000005580	184.23	210.469	191.938	258.938	269.692	200.78	195.546	243.137	-0.315863	0.078411	0.402106	Adcy9	16	4287529	4420498	-	5197	protein_coding	adenylate cyclase 9 [Source:MGI Symbol;Acc:MGI:108450] && sp|P51830|ADCY9_MOUSE Adenylate cyclase type 9 OS=Mus musculus OX=10090 GN=Adcy9 PE=1 SV=1 && -	-
ENSMUSG00000049721	12.779	5.03515	0	2.53861	0.91732	0	5.93804	1.15198	2.32114	0.078438	0.402106	Gal3st1	11	3983636	3999326	+	2041	protein_coding	galactose-3-O-sulfotransferase 1 [Source:MGI Symbol;Acc:MGI:1858277] && sp|Q9JHE4|G3ST1_MOUSE Galactosylceramide sulfotransferase OS=Mus musculus OX=10090 GN=Gal3st1 PE=1 SV=2 && PF06990:Galactose-3-O-sulfotransferase	-
ENSMUSG00000032719	2.12983	1.00703	0	2.53861	3.66928	5.51594	1.04562	3.90794	-1.89633	0.0784815	1	Sbspon	1	15853862	15892722	-	2748	protein_coding	somatomedin B and thrombospondin, type 1 domain containing [Source:MGI Symbol;Acc:MGI:2684952] && sp|Q3UPR9|SBSPO_MOUSE Somatomedin-B and thrombospondin type-1 domain-containing protein OS=Mus musculus OX=10090 GN=Sbspon PE=2 SV=1 && -	-
ENSMUSG00000081810	6.38949	20.1406	4.17257	13.5392	44.0314	11.0319	10.2342	22.8675	-1.15905	0.0785199	0.402229	Gm11878	4	22519628	22520027	+	400	processed_pseudogene	predicted gene 11878 [Source:MGI Symbol;Acc:MGI:3651784] && sp|Q56JU9|RS24_BOVIN 40S ribosomal protein S24 OS=Bos taurus OX=9913 GN=RPS24 PE=2 SV=2 && -	-
ENSMUSG00000068011	4.25966	10.0703	2.08629	1.69241	1.83464	2.20638	5.47208	1.91114	1.52992	0.0785882	0.402229	Mkrn2os	6	115583544	115592576	-	2542	protein_coding	makorin, ring finger protein 2, opposite strand [Source:MGI Symbol;Acc:MGI:1917541] && sp|H3BPM6|MKROS_HUMAN MKRN2 opposite strand protein OS=Homo sapiens OX=9606 GN=MKRN2OS PE=4 SV=1 && -	-
ENSMUSG00000022805	31.9475	46.3234	70.9337	33.8481	32.1062	34.1988	49.7349	33.3844	0.575836	0.0786001	0.402229	Maats1	16	38297754	38342143	-	4527	protein_coding	MYCBP-associated, testis expressed 1 [Source:MGI Symbol;Acc:MGI:2443598] && sp|Q8BRC6|CFA91_MOUSE Cilia- and flagella-associated protein 91 OS=Mus musculus OX=10090 GN=Cfap91 PE=1 SV=3 && PF14738:Cilia- and flagella-associated protein 91	-
ENSMUSG00000029815	298.176	317.214	375.532	273.323	264.188	281.313	330.307	272.942	0.275567	0.0786505	0.402229	Malsu1	6	49073795	49086751	+	3777	protein_coding	mitochondrial assembly of ribosomal large subunit 1 [Source:MGI Symbol;Acc:MGI:1922843] && sp|Q9CWV0|MASU1_MOUSE Mitochondrial assembly of ribosomal large subunit protein 1 OS=Mus musculus OX=10090 GN=Malsu1 PE=1 SV=1 && PF02410:Ribosomal silencing factor during starvation	-
novel.99	8.51932	9.06327	9.38829	5.07722	5.50392	0	8.99029	3.52705	1.31382	0.0786551	0.402229	-	18	10639409	10639783	+	375	-	- && - && -	-
ENSMUSG00000097353	23.4281	23.1617	10.4314	43.1563	23.8503	26.4765	19.0071	31.1611	-0.717251	0.0787605	0.402323	A430046D13Rik	10	128499364	128504242	+	1997	lincRNA	Riken cDNA A430046D13 gene [Source:MGI Symbol;Acc:MGI:3609643] && - && -	-
ENSMUSG00000047562	14.9088	24.1687	137.695	18.6165	9.1732	47.4371	58.9241	25.0756	1.23815	0.078779	0.402323	Mmp10	9	7502352	7510240	+	1722	protein_coding	matrix metallopeptidase 10 [Source:MGI Symbol;Acc:MGI:97007] && sp|O55123|MMP10_MOUSE Stromelysin-2 OS=Mus musculus OX=10090 GN=Mmp10 PE=2 SV=1 && PF01471:Putative peptidoglycan binding domain|PF00045:Hemopexin|PF00413:Matrixin	-
ENSMUSG00000109754	7.45441	2.01406	7.302	1.69241	0.91732	3.30956	5.59016	1.9731	1.52903	0.0787892	0.402323	Gm39214	8	85730816	85765095	+	1542	lincRNA	predicted gene, 39214 [Source:MGI Symbol;Acc:MGI:5622099] && sp|Q99KW9|TIP_MOUSE T-cell immunomodulatory protein OS=Mus musculus OX=10090 GN=Itfg1 PE=1 SV=2 && -	-
ENSMUSG00000116780	0	0	1.04314	5.92342	0	3.30956	0.347714	3.07766	-3.05164	0.0787944	1	Gm3417	17	14964242	14978790	-	749	protein_coding	predicted gene 3417 [Source:MGI Symbol;Acc:MGI:3781595] && sp|P11985|DYLT2_MOUSE Dynein light chain Tctex-type protein 2 OS=Mus musculus OX=10090 GN=Dynlt2 PE=1 SV=2 && PF03645:Tctex-1 family	-
ENSMUSG00000071714	69.2195	82.5764	98.0555	92.2361	82.5588	204.09	83.2838	126.295	-0.596942	0.0788649	0.402477	Csf2rb2	15	78282507	78305721	-	4740	protein_coding	colony stimulating factor 2 receptor, beta 2, low-affinity (granulocyte-macrophage) [Source:MGI Symbol;Acc:MGI:1339760] && sp|P26954|IL3B2_MOUSE Interleukin-3 receptor class 2 subunit beta OS=Mus musculus OX=10090 GN=Csf2rb2 PE=1 SV=1 && -	-
ENSMUSG00000093671	0	0	0	0	4.5866	3.30956	0	2.63206	-3.78047	0.0788967	0.402477	Gm20656	3	64447967	64460095	+	518	unprocessed_pseudogene	predicted gene 20656 [Source:MGI Symbol;Acc:MGI:5313103] && sp|Q3THK7|GUAA_MOUSE GMP synthase [glutamine-hydrolyzing] OS=Mus musculus OX=10090 GN=Gmps PE=1 SV=2 && PF00958:GMP synthase C terminal domain	-
ENSMUSG00000022548	0	0	1.04314	7.61582	1.83464	0	0.347714	3.15015	-3.09669	0.0789575	0.402522	Apod	16	31296192	31314808	-	2577	protein_coding	apolipoprotein D [Source:MGI Symbol;Acc:MGI:88056] && sp|P51910|APOD_MOUSE Apolipoprotein D OS=Mus musculus OX=10090 GN=Apod PE=1 SV=1 && PF08212:Lipocalin-like domain	-
ENSMUSG00000085078	2.12983	3.02109	4.17257	9.30823	2.75196	11.0319	3.10783	7.69736	-1.30042	0.0789805	1	C030013C21Rik	11	80507410	80509106	-	795	sense_intronic	RIKEN cDNA C030013C21 gene [Source:MGI Symbol;Acc:MGI:1924667] && - && -	-
ENSMUSG00000057914	11.7141	14.0984	26.0786	8.46203	10.0905	11.0319	17.297	9.86148	0.816115	0.0790197	0.402522	Cacnb2	2	14603088	14987908	+	13228	protein_coding	calcium channel, voltage-dependent, beta 2 subunit [Source:MGI Symbol;Acc:MGI:894644] && sp|Q8CC27|CACB2_MOUSE Voltage-dependent L-type calcium channel subunit beta-2 OS=Mus musculus OX=10090 GN=Cacnb2 PE=1 SV=1 && PF12052:Voltage gated calcium channel subunit beta domain 4Aa N terminal	-
ENSMUSG00000064918	5.32458	6.04218	0	7.61582	9.1732	12.1351	3.78892	9.64137	-1.34051	0.0790266	1	Gm22571	9	64175873	64175942	+	70	snoRNA	predicted gene, 22571 [Source:MGI Symbol;Acc:MGI:5452348] && - && -	-
ENSMUSG00000117285	11.7141	17.1195	6.25886	3.38481	8.25588	5.51594	11.6975	5.71888	1.03846	0.0790545	0.402522	AC151284.2	17	78750995	78751496	+	502	processed_pseudogene	microtubule-associated protein 7 (Map7) pseudogene && sp|O88735|MAP7_MOUSE Ensconsin OS=Mus musculus OX=10090 GN=Map7 PE=1 SV=1 && -	-
ENSMUSG00000001558	10.6492	3.02109	4.17257	0.846203	0	4.41275	5.94761	1.75299	1.81889	0.0790599	0.402522	Klhl10	11	100441917	100457022	+	2161	protein_coding	kelch-like 10 [Source:MGI Symbol;Acc:MGI:2181067] && sp|Q9D5V2|KLH10_MOUSE Kelch-like protein 10 OS=Mus musculus OX=10090 GN=Klhl10 PE=1 SV=1 && PF07707:BTB And C-terminal Kelch|PF01344:Kelch motif|PF00651:BTB/POZ domain	-
ENSMUSG00000104213	1.06492	1.00703	3.12943	3.38481	7.33856	4.41275	1.73379	5.04538	-1.5425	0.0791008	0.402533	Ighd	12	113406604	113416324	-	1900	IG_C_gene	immunoglobulin heavy constant delta [Source:MGI Symbol;Acc:MGI:96447] && sp|P01882|IGHDM_MOUSE Ig delta chain C region membrane-bound form OS=Mus musculus OX=10090 PE=1 SV=3 && PF07654:Immunoglobulin C1-set domain	-
ENSMUSG00000108181	53.2458	47.3304	44.8552	65.1576	63.2951	62.8817	48.4771	63.7781	-0.396719	0.0791883	1	C030015A19Rik	6	90386807	90389357	+	2551	TEC	RIKEN cDNA C030015A19 gene [Source:MGI Symbol;Acc:MGI:1924668] && - && -	-
ENSMUSG00000064349	66.0248	81.5694	56.3297	55.0032	52.2873	43.0243	67.9746	50.1049	0.436817	0.0792437	0.403012	mt-Tc	MT	5192	5257	-	66	Mt_tRNA	mitochondrially encoded tRNA cysteine [Source:MGI Symbol;Acc:MGI:102490] && - && -	-
ENSMUSG00000049047	625.105	627.379	977.425	625.344	621.026	442.379	743.303	562.916	0.400383	0.0793626	0.403012	Armcx3	X	134756595	134761455	+	3540	protein_coding	armadillo repeat containing, X-linked 3 [Source:MGI Symbol;Acc:MGI:1918953] && sp|Q8BHS6|ARMX3_MOUSE Armadillo repeat-containing X-linked protein 3 OS=Mus musculus OX=10090 GN=Armcx3 PE=1 SV=1 && -	-
ENSMUSG00000027961	19.1685	22.1547	13.5609	38.0791	28.4369	19.8574	18.2947	28.7911	-0.661319	0.0793821	0.403012	Lrrc39	3	116562973	116583134	+	5230	protein_coding	leucine rich repeat containing 39 [Source:MGI Symbol;Acc:MGI:1924557] && sp|Q8BYH3|TRM13_MOUSE tRNA:m(4)X modification enzyme TRM13 homolog OS=Mus musculus OX=10090 GN=Trmt13 PE=2 SV=1 && -	-
ENSMUSG00000107722	1.06492	0	0	4.23101	4.5866	0	0.354972	2.93921	-2.99485	0.0795405	0.403012	2900060B14Rik	1	118458652	118459267	-	616	antisense	RIKEN cDNA 2900060B14 gene [Source:MGI Symbol;Acc:MGI:1915454] && - && -	-
ENSMUSG00000036552	138.439	169.181	163.773	181.087	175.208	247.114	157.131	201.137	-0.353509	0.0795737	1	Ermard	17	15041208	15090044	+	7247	protein_coding	ER membrane associated RNA degradation [Source:MGI Symbol;Acc:MGI:1917317] && sp|Q3B8R1|EMARD_RAT Endoplasmic reticulum membrane-associated RNA degradation protein OS=Rattus norvegicus OX=10116 GN=Ermard PE=2 SV=2 && PF13910:Domain of unknown function (DUF4209)	-
ENSMUSG00000035936	48.9861	30.2109	51.114	33.8481	33.0235	18.7542	43.437	28.5419	0.596212	0.079607	0.403012	Aldh5a1	13	24907579	24937661	-	5647	protein_coding	aldhehyde dehydrogenase family 5, subfamily A1 [Source:MGI Symbol;Acc:MGI:2441982] && sp|Q8BWF0|SSDH_MOUSE Succinate-semialdehyde dehydrogenase, mitochondrial OS=Mus musculus OX=10090 GN=Aldh5a1 PE=1 SV=1 && -	-
ENSMUSG00000020680	2684.65	3041.23	2827.96	3424.58	3369.32	3106.58	2851.28	3300.16	-0.211001	0.0796148	0.403012	Taf15	11	83473086	83506743	+	2919	protein_coding	TATA-box binding protein associated factor 15 [Source:MGI Symbol;Acc:MGI:1917689] && sp|Q92804|RBP56_HUMAN TATA-binding protein-associated factor 2N OS=Homo sapiens OX=9606 GN=TAF15 PE=1 SV=1 && PF00076:RNA recognition motif. (a.k.a. RRM, RBD, or RNP domain)|PF00641:Zn-finger in Ran binding protein and others	-
ENSMUSG00000001240	0	3.02109	11.4746	1.69241	0.91732	0	4.83189	0.869909	2.42742	0.0796518	0.403012	Ramp2	11	101246028	101259546	+	3301	protein_coding	receptor (calcitonin) activity modifying protein 2 [Source:MGI Symbol;Acc:MGI:1859650] && sp|Q9CQ80|VPS25_MOUSE Vacuolar protein-sorting-associated protein 25 OS=Mus musculus OX=10090 GN=Vps25 PE=1 SV=1 && -	-
ENSMUSG00000028445	0	1.00703	0	4.23101	4.5866	0	0.335677	2.93921	-2.99481	0.0796526	0.403012	Enho	4	41638144	41640324	-	1269	protein_coding	energy homeostasis associated [Source:MGI Symbol;Acc:MGI:1916888] && sp|Q6UWT2|ENHO_HUMAN Adropin OS=Homo sapiens OX=9606 GN=ENHO PE=2 SV=2 && -	-
ENSMUSG00000061972	19.1685	36.2531	51.114	39.7715	36.6928	111.422	35.5119	62.6288	-0.812971	0.0796636	0.403012	Olfr99	17	37279043	37283460	-	1778	protein_coding	olfactory receptor 99 [Source:MGI Symbol;Acc:MGI:2177482] && sp|Q9TU86|OR1G1_GORGO Olfactory receptor 1G1 OS=Gorilla gorilla gorilla OX=9595 GN=OR1G1 PE=3 SV=1 && PF13853:Olfactory receptor	-
ENSMUSG00000089875	33.0124	19.1336	35.4669	33.8481	39.4448	60.6754	29.2043	44.6561	-0.607988	0.0796731	0.403012	Etohd2	13	59769497	59775407	+	5225	antisense	ethanol decreased 2 [Source:MGI Symbol;Acc:MGI:1261417] && - && -	-
ENSMUSG00000048087	1769.89	1867.03	1937.12	1662.79	1628.24	1562.11	1858.01	1617.72	0.199669	0.0797107	0.403012	Gm4737	16	46152985	46155077	-	2093	protein_coding	predicted gene 4737 [Source:MGI Symbol;Acc:MGI:3643647] && sp|P50247|SAHH_MOUSE Adenosylhomocysteinase OS=Mus musculus OX=10090 GN=Ahcy PE=1 SV=3 && PF05221:S-adenosyl-L-homocysteine hydrolase|PF00670:S-adenosyl-L-homocysteine hydrolase, NAD binding domain	-
ENSMUSG00000063409	4.25966	3.02109	0	0	0	0	2.42692	0	3.79607	0.0797221	0.403012	Lrrc43	5	123489305	123508205	+	2066	protein_coding	leucine rich repeat containing 43 [Source:MGI Symbol;Acc:MGI:2685907] && sp|Q3V0L5|LRC43_MOUSE Leucine-rich repeat-containing protein 43 OS=Mus musculus OX=10090 GN=Lrrc43 PE=2 SV=1 && -	-
ENSMUSG00000111171	14.9088	16.1125	36.51	27.9247	22.0157	75.0168	22.5104	41.6524	-0.881463	0.0797556	0.403012	Gm47815	10	43034993	43050219	+	1686	antisense	predicted gene, 47815 [Source:MGI Symbol;Acc:MGI:6097001] && - && -	-
ENSMUSG00000110521	3.19475	4.02812	1.04314	6.76962	5.50392	7.72232	2.75534	6.66529	-1.26772	0.0797734	0.403012	Olfr856-ps1	9	19657057	19658647	-	948	unprocessed_pseudogene	olfactory receptor 856, pseudogene 1 [Source:MGI Symbol;Acc:MGI:3030690] && sp|Q8NG98|OR7D4_HUMAN Olfactory receptor 7D4 OS=Homo sapiens OX=9606 GN=OR7D4 PE=1 SV=1 && PF13853:Olfactory receptor	-
ENSMUSG00000097166	23.4281	9.06327	20.8629	14.3854	2.75196	8.82551	17.7848	8.6543	1.03208	0.0797749	0.403012	9330179D12Rik	6	127149389	127212411	+	1486	antisense	RIKEN cDNA 9330179D12 gene [Source:MGI Symbol;Acc:MGI:1924808] && - && -	-
ENSMUSG00000112820	1.06492	0	0	1.69241	2.75196	2.20638	0.354972	2.21691	-2.57363	0.0797798	1	Gm48298	10	105806538	105808867	-	2330	TEC	predicted gene, 48298 [Source:MGI Symbol;Acc:MGI:6097740] && sp|P11369|LORF2_MOUSE LINE-1 retrotransposable element ORF2 protein OS=Mus musculus OX=10090 GN=Pol PE=1 SV=2 && -	-
ENSMUSG00000027380	0	0	0	0.846203	3.66928	1.10319	0	1.87289	-3.29646	0.0799069	0.403419	Acoxl	2	127838876	128123873	+	3179	protein_coding	acyl-Coenzyme A oxidase-like [Source:MGI Symbol;Acc:MGI:1921371] && sp|Q9DBS4|ACOXL_MOUSE Acyl-coenzyme A oxidase-like protein OS=Mus musculus OX=10090 GN=Acoxl PE=1 SV=1 && -	-
ENSMUSG00000058966	0	0	0	0.846203	3.66928	1.10319	0	1.87289	-3.29646	0.0799165	1	Fam57b	7	126797668	126830219	+	3935	protein_coding	family with sequence similarity 57, member B [Source:MGI Symbol;Acc:MGI:1916202] && sp|Q7TNV1|TLC3B_MOUSE Ceramide synthase OS=Mus musculus OX=10090 GN=Tlcd3b PE=1 SV=2 && PF03798:TLC domain	-
ENSMUSG00000087397	0	0	1.04314	1.69241	2.75196	2.20638	0.347714	2.21691	-2.57364	0.0799165	1	Rapgef3os2	15	97766549	97768713	+	920	antisense	Rap guanine nucleotide exchange factor (GEF) 3, opposite strand 2 [Source:MGI Symbol;Acc:MGI:3826581] && sp|Q8VCC8|RPGF3_MOUSE Rap guanine nucleotide exchange factor 3 OS=Mus musculus OX=10090 GN=Rapgef3 PE=1 SV=2 && -	-
ENSMUSG00000024901	88.388	93.6538	119.961	79.543	88.9801	52.953	100.668	73.8254	0.44286	0.0799593	0.403419	Peli3	19	4930651	4943127	-	3786	protein_coding	pellino 3 [Source:MGI Symbol;Acc:MGI:1924963] && sp|Q8BXR6|PELI3_MOUSE E3 ubiquitin-protein ligase pellino homolog 3 OS=Mus musculus OX=10090 GN=Peli3 PE=2 SV=2 && PF04710:Pellino	-
ENSMUSG00000097155	1.06492	1.00703	0	1.69241	11.0078	0	0.690648	4.23342	-2.62204	0.0799925	1	Gm26511	9	21717616	21723450	-	1895	lincRNA	predicted gene, 26511 [Source:MGI Symbol;Acc:MGI:5477005] && - && -	-
ENSMUSG00000055497	6.38949	6.04218	4.17257	2.53861	2.75196	1.10319	5.53475	2.13125	1.35189	0.0800393	0.403419	Gm9974	16	17081999	17082691	-	693	processed_pseudogene	predicted gene 9974 [Source:MGI Symbol;Acc:MGI:3708610] && sp|Q65Z59|YPEL1_CHLAE Protein yippee-like 1 OS=Chlorocebus aethiops OX=9534 GN=YPEL1 PE=3 SV=1 && -	-
ENSMUSG00000052852	12.779	16.1125	11.4746	5.92342	8.25588	8.82551	13.4553	7.66827	0.821621	0.0800481	0.403419	Reep1	6	71707561	71810710	+	4112	protein_coding	receptor accessory protein 1 [Source:MGI Symbol;Acc:MGI:1098827] && sp|Q8BGH4|REEP1_MOUSE Receptor expression-enhancing protein 1 OS=Mus musculus OX=10090 GN=Reep1 PE=1 SV=1 && -	-
ENSMUSG00000115808	4.25966	3.02109	11.4746	0.846203	3.66928	2.20638	6.25178	2.24062	1.48844	0.0800491	0.403419	Gm18949	15	34268527	34269829	-	1199	processed_pseudogene	predicted gene, 18949 [Source:MGI Symbol;Acc:MGI:5011134] && sp|Q3SZ65|IF4A2_BOVIN Eukaryotic initiation factor 4A-II OS=Bos taurus OX=9913 GN=EIF4A2 PE=2 SV=1 && -	-
ENSMUSG00000034463	152.283	129.907	153.342	130.315	117.417	93.771	145.177	113.834	0.346954	0.080152	1	Scara3	14	65919394	65953935	-	3597	protein_coding	scavenger receptor class A, member 3 [Source:MGI Symbol;Acc:MGI:2444418] && sp|Q8C850|SCAR3_MOUSE Scavenger receptor class A member 3 OS=Mus musculus OX=10090 GN=Scara3 PE=2 SV=1 && -	-
ENSMUSG00000027971	5.32458	0	2.08629	0	0	0	2.47029	0	3.81962	0.0801574	0.40377	Ndst4	3	125404076	125728899	+	11720	protein_coding	N-deacetylase/N-sulfotransferase (heparin glucosaminyl) 4 [Source:MGI Symbol;Acc:MGI:1932545] && sp|Q9EQW8|NDST4_MOUSE Bifunctional heparan sulfate N-deacetylase/N-sulfotransferase 4 OS=Mus musculus OX=10090 GN=Ndst4 PE=2 SV=2 && PF12062:heparan sulfate-N-deacetylase|PF00685:Sulfotransferase domain	-
ENSMUSG00000030145	122.465	117.822	89.7103	97.3133	88.0628	55.1594	109.999	80.1785	0.451115	0.0802128	0.403854	Zfp248	6	118427319	118455528	-	5039	protein_coding	zinc finger protein 248 [Source:MGI Symbol;Acc:MGI:1919970] && sp|Q8NDW4|ZN248_HUMAN Zinc finger protein 248 OS=Homo sapiens OX=9606 GN=ZNF248 PE=1 SV=1 && PF01352:KRAB box|PF00096:Zinc finger, C2H2 type	-
ENSMUSG00000097902	1.06492	0	0	2.53861	6.42124	0	0.354972	2.98662	-3.01496	0.0802787	1	Gm26531	12	85962598	85979021	-	1967	antisense	predicted gene, 26531 [Source:MGI Symbol;Acc:MGI:5477025] && - && -	-
ENSMUSG00000085172	47.9212	28.1968	36.51	44.0025	56.8739	58.469	37.5427	53.1151	-0.499518	0.0803371	0.404285	Gm6542	18	36609958	36610729	+	772	processed_pseudogene	predicted gene 6542 [Source:MGI Symbol;Acc:MGI:3644649] && sp|Q9R1P0|PSA4_MOUSE Proteasome subunit alpha type-4 OS=Mus musculus OX=10090 GN=Psma4 PE=1 SV=1 && PF00227:Proteasome subunit	-
ENSMUSG00000088623	4.25966	0	6.25886	0.846203	0.91732	0	3.50617	0.587841	2.52368	0.080406	0.404436	Gm23031	5	92302174	92302292	+	119	snRNA	predicted gene, 23031 [Source:MGI Symbol;Acc:MGI:5452808] && - && -	-
ENSMUSG00000105461	0	0	0	0.846203	0	7.72232	0	2.85617	-3.89129	0.0804534	0.404454	Gm4742	14	52368918	52369688	-	771	processed_pseudogene	predicted gene 4742 [Source:MGI Symbol;Acc:MGI:3645661] && sp|P18422|PSA3_RAT Proteasome subunit alpha type-3 OS=Rattus norvegicus OX=10116 GN=Psma3 PE=1 SV=3 && PF00227:Proteasome subunit	-
ENSMUSG00000114929	0	0	0	0.846203	0	7.72232	0	2.85617	-3.89129	0.0804873	0.404454	Gm48441	13	58232143	58236750	+	474	antisense	predicted gene, 48441 [Source:MGI Symbol;Acc:MGI:6097949] && - && -	-
ENSMUSG00000007805	43.6615	52.3655	78.2357	39.7715	44.0314	39.7148	58.0876	41.1726	0.496259	0.0806345	1	Twist2	1	91801461	91848028	+	3174	protein_coding	twist basic helix-loop-helix transcription factor 2 [Source:MGI Symbol;Acc:MGI:104685] && sp|Q8WVJ9|TWST2_HUMAN Twist-related protein 2 OS=Homo sapiens OX=9606 GN=TWIST2 PE=1 SV=1 && PF00010:Helix-loop-helix DNA-binding domain	-
ENSMUSG00000116090	3.19475	4.02812	8.34515	1.69241	2.75196	1.10319	5.18934	1.84918	1.47299	0.0806816	0.405236	Rpl19-ps6	15	7975075	7975660	+	586	processed_pseudogene	ribosomal protein L19, pseudogene 6 [Source:MGI Symbol;Acc:MGI:3644218] && sp|Q3T0W9|RL19_BOVIN 60S ribosomal protein L19 OS=Bos taurus OX=9913 GN=RPL19 PE=2 SV=1 && PF01280:Ribosomal protein L19e	-
ENSMUSG00000085500	3.19475	1.00703	1.04314	3.38481	2.75196	9.92869	1.74831	5.35516	-1.60265	0.0807485	0.405283	Gm16976	14	44858671	44974944	+	5730	transcribed_unprocessed_pseudogene	predicted gene, 16976 [Source:MGI Symbol;Acc:MGI:4439900] && - && -	-
ENSMUSG00000072423	0	1.00703	2.08629	5.92342	9.1732	0	1.03111	5.03221	-2.2938	0.0807688	0.405283	Psmb11	14	54621433	54629556	+	4791	protein_coding	proteasome (prosome, macropain) subunit, beta type, 11 [Source:MGI Symbol;Acc:MGI:1921152] && sp|Q8BG41|PSB11_MOUSE Proteasome subunit beta type-11 OS=Mus musculus OX=10090 GN=Psmb11 PE=1 SV=1 && -	-
ENSMUSG00000022707	402.538	333.327	367.186	316.48	295.377	312.202	367.684	308.02	0.255205	0.0808456	0.405473	Gbe1	16	70313949	70569716	+	5352	protein_coding	glucan (1,4-alpha-), branching enzyme 1 [Source:MGI Symbol;Acc:MGI:1921435] && sp|Q9D6Y9|GLGB_MOUSE 1,4-alpha-glucan-branching enzyme OS=Mus musculus OX=10090 GN=Gbe1 PE=1 SV=1 && PF02922:Carbohydrate-binding module 48 (Isoamylase N-terminal domain)|PF00128:Alpha amylase, catalytic domain|PF02806:Alpha amylase, C-terminal all-beta domain	-
ENSMUSG00000088631	2.12983	2.01406	2.08629	0	0.91732	0	2.07673	0.305773	2.60959	0.0810007	0.406055	Gm22311	11	83764638	83764747	-	110	rRNA	predicted gene, 22311 [Source:MGI Symbol;Acc:MGI:5452088] && - && -	-
ENSMUSG00000074004	5.32458	5.03515	0	0.846203	0.91732	0	3.45324	0.587841	2.50449	0.0810523	0.406119	B3gnt6	7	98192417	98199481	-	2371	protein_coding	UDP-GlcNAc:betaGal beta-1,3-N-acetylglucosaminyltransferase 6 (core 3 synthase) [Source:MGI Symbol;Acc:MGI:3039603] && sp|Q3USF0|B3GN6_MOUSE Acetylgalactosaminyl-O-glycosyl-glycoprotein beta-1,3-N-acetylglucosaminyltransferase OS=Mus musculus OX=10090 GN=B3gnt6 PE=2 SV=2 && -	-
ENSMUSG00000107195	0	4.02812	3.12943	0	0	0	2.38585	0	3.77358	0.0811309	0.406317	4930589O11Rik	5	65493096	65494015	+	920	TEC	RIKEN cDNA 4930589O11 gene [Source:MGI Symbol;Acc:MGI:1925464] && - && -	-
ENSMUSG00000022603	0	4.02812	3.12943	0	0	0	2.38585	0	3.77358	0.0812462	0.406699	Mroh4	15	74606029	74636353	-	4049	protein_coding	maestro heat-like repeat family member 4 [Source:MGI Symbol;Acc:MGI:1916689] && sp|Q6ZUA9|MROH5_HUMAN Maestro heat-like repeat family member 5 OS=Homo sapiens OX=9606 GN=MROH5 PE=2 SV=2 && -	-
ENSMUSG00000106243	1.06492	1.00703	3.12943	0	0	0	1.73379	0	3.31069	0.0813422	0.406856	Gm5050	5	136211012	136211786	-	775	processed_pseudogene	predicted gene 5050 [Source:MGI Symbol;Acc:MGI:3649091] && sp|P12970|RL7A_MOUSE 60S ribosomal protein L7a OS=Mus musculus OX=10090 GN=Rpl7a PE=1 SV=2 && -	-
ENSMUSG00000089082	1.06492	1.00703	3.12943	0	0	0	1.73379	0	3.31069	0.0813685	0.406856	Gm24860	9	111244592	111244867	-	276	misc_RNA	predicted gene, 24860 [Source:MGI Symbol;Acc:MGI:5454637] && - && -	-
ENSMUSG00000093458	1.06492	1.00703	3.12943	0	0	0	1.73379	0	3.31069	0.0813946	0.406856	Gm20688	15	77391702	77392381	-	512	sense_intronic	predicted gene 20688 [Source:MGI Symbol;Acc:MGI:5313135] && - && -	-
ENSMUSG00000048231	1.06492	1.00703	3.12943	0	0	0	1.73379	0	3.31069	0.0814578	0.406977	H2-M10.4	17	36458917	36462334	-	1410	protein_coding	histocompatibility 2, M region locus 10.4 [Source:MGI Symbol;Acc:MGI:1276527] && sp|P01898|HA10_MOUSE H-2 class I histocompatibility antigen, Q10 alpha chain OS=Mus musculus OX=10090 GN=H2-Q10 PE=1 SV=3 && PF07654:Immunoglobulin C1-set domain|PF00129:Class I Histocompatibility antigen, domains alpha 1 and 2	-
ENSMUSG00000041144	14.9088	9.06327	4.17257	5.07722	5.50392	1.10319	9.38155	3.89478	1.24127	0.0815077	1	Dnah7b	1	46066315	46373546	+	19980	protein_coding	dynein, axonemal, heavy chain 7B [Source:MGI Symbol;Acc:MGI:2684953] && sp|Q63170|DYH7_RAT Dynein axonemal heavy chain 7 OS=Rattus norvegicus OX=10116 GN=Dnah7 PE=2 SV=2 && PF18199:Dynein heavy chain C-terminal domain|PF12777:Microtubule-binding stalk of dynein motor|PF12775:P-loop containing dynein motor region|PF03028:Dynein heavy chain region D6 P-loop domain|PF12781:ATP-binding dynein motor r…	-
ENSMUSG00000086697	5.32458	14.0984	7.302	3.38481	3.66928	5.51594	8.90833	4.19001	1.10635	0.0816018	0.407501	4933427G23Rik	5	23815618	23831897	-	2515	transcribed_processed_pseudogene	RIKEN cDNA 4933427G23 gene [Source:MGI Symbol;Acc:MGI:3036235] && sp|Q921Y2|IMP3_MOUSE U3 small nucleolar ribonucleoprotein protein IMP3 OS=Mus musculus OX=10090 GN=Imp3 PE=2 SV=1 && -	-
ENSMUSG00000064580	2.12983	2.01406	2.08629	0.846203	0	0	2.07673	0.282068	2.6096	0.0817103	0.407847	Gm25134	7	19242130	19242289	+	160	snRNA	predicted gene, 25134 [Source:MGI Symbol;Acc:MGI:5454911] && - && -	-
ENSMUSG00000028631	0	3.02109	8.34515	0	0.91732	1.10319	3.78874	0.673503	2.536	0.0817217	1	Kcnq4	4	120696138	120748612	-	4024	protein_coding	potassium voltage-gated channel, subfamily Q, member 4 [Source:MGI Symbol;Acc:MGI:1926803] && sp|Q9JK97|KCNQ4_MOUSE Potassium voltage-gated channel subfamily KQT member 4 OS=Mus musculus OX=10090 GN=Kcnq4 PE=2 SV=2 && PF03520:KCNQ voltage-gated potassium channel|PF00520:Ion transport protein	-
ENSMUSG00000111197	0	0	2.08629	5.07722	2.75196	2.20638	0.695429	3.34518	-2.2791	0.0817375	1	Gm10608	9	119162730	119163405	+	676	processed_pseudogene	predicted gene 10608 [Source:MGI Symbol;Acc:MGI:3642009] && sp|P68254|1433T_MOUSE 14-3-3 protein theta OS=Mus musculus OX=10090 GN=Ywhaq PE=1 SV=1 && PF00244:14-3-3 protein	-
ENSMUSG00000025213	5.32458	12.0844	9.38829	16.0779	17.4291	13.2383	8.93241	15.5817	-0.802592	0.0817591	0.407895	Kazald1	19	45075241	45079289	+	1681	protein_coding	Kazal-type serine peptidase inhibitor domain 1 [Source:MGI Symbol;Acc:MGI:2147606] && sp|Q8BJ66|KAZD1_MOUSE Kazal-type serine protease inhibitor domain-containing protein 1 OS=Mus musculus OX=10090 GN=Kazald1 PE=1 SV=2 && PF07679:Immunoglobulin I-set domain|PF00219:Insulin-like growth factor binding protein	-
ENSMUSG00000031667	363.136	357.496	379.704	285.17	314.641	329.853	366.779	309.888	0.244222	0.0818764	0.408285	Aktip	8	91111784	91199976	-	7040	protein_coding	thymoma viral proto-oncogene 1 interacting protein [Source:MGI Symbol;Acc:MGI:3693832] && - && -	-
ENSMUSG00000107570	3.19475	1.00703	4.17257	5.07722	7.33856	7.72232	2.79145	6.7127	-1.26584	0.0819909	0.408661	Gm44207	6	89345140	89346563	+	1424	TEC	predicted gene, 44207 [Source:MGI Symbol;Acc:MGI:5690599] && - && -	-
ENSMUSG00000096699	6.38949	8.05624	12.5177	14.3854	13.7598	18.7542	8.98782	15.6332	-0.79258	0.0820526	0.408773	Rps19-ps4	18	42252398	42252835	+	438	processed_pseudogene	ribosomal protein S19, pseudogene 4 [Source:MGI Symbol;Acc:MGI:3645935] && sp|Q9CZX8|RS19_MOUSE 40S ribosomal protein S19 OS=Mus musculus OX=10090 GN=Rps19 PE=1 SV=3 && PF01090:Ribosomal protein S19e	-
ENSMUSG00000036768	408.928	436.044	502.795	401.1	371.515	350.814	449.255	374.476	0.261945	0.082094	0.408784	Kif15	9	122951046	123018733	+	11020	protein_coding	kinesin family member 15 [Source:MGI Symbol;Acc:MGI:1098258] && sp|Q6P9L6|KIF15_MOUSE Kinesin-like protein KIF15 OS=Mus musculus OX=10090 GN=Kif15 PE=1 SV=1 && PF15908:Hyaluronan mediated motility receptor C-terminal|PF00225:Kinesin motor domain	-
ENSMUSG00000079467	5.32458	9.06327	8.34515	9.30823	13.7598	18.7542	7.57766	13.9407	-0.866119	0.0822239	1	Gm14966	19	6355522	6363759	-	802	antisense	predicted gene 14966 [Source:MGI Symbol;Acc:MGI:3705223] && - && -	-
ENSMUSG00000045345	4.25966	11.0773	5.21572	12.693	16.5118	9.92869	6.8509	13.0445	-0.928434	0.0822777	0.409446	9530056K15Rik	5	143397248	143399563	-	2316	TEC	RIKEN cDNA 9530056K15 gene [Source:MGI Symbol;Acc:MGI:2444456] && - && -	-
ENSMUSG00000096964	0	0	1.04314	0	4.5866	4.41275	0.347714	2.99979	-3.003	0.0823305	0.409446	Gm6345	1	170254049	170255739	-	1691	transcribed_unprocessed_pseudogene	predicted gene 6345 [Source:MGI Symbol;Acc:MGI:3647370] && sp|P97343|UHMK1_MOUSE Serine/threonine-protein kinase Kist OS=Mus musculus OX=10090 GN=Uhmk1 PE=1 SV=3 && -	-
ENSMUSG00000018604	0	3.02109	5.21572	0	0	1.10319	2.7456	0.367729	3.01407	0.0823598	0.409446	Tbx3	5	119670669	119684724	+	6624	protein_coding	T-box 3 [Source:MGI Symbol;Acc:MGI:98495] && sp|P70324|TBX3_MOUSE T-box transcription factor TBX3 OS=Mus musculus OX=10090 GN=Tbx3 PE=1 SV=3 && PF00907:T-box|PF12598:T-box transcription factor	-
ENSMUSG00000087443	2.12983	5.03515	5.21572	1.69241	1.83464	0	4.1269	1.17568	1.76177	0.0823842	0.409446	Ppp1r18os	17	35860918	35866886	-	784	antisense	protein phosphatase 1, regulatory subunit 18, opposite strand [Source:MGI Symbol;Acc:MGI:1918627] && sp|Q5TM67|NRM_MACMU Nurim OS=Macaca mulatta OX=9544 GN=NRM PE=3 SV=1 && -	-
ENSMUSG00000041247	0	4.02812	2.08629	7.61582	4.5866	5.51594	2.03813	5.90612	-1.52669	0.0824801	1	Lamp3	16	19653378	19706375	-	3356	protein_coding	lysosomal-associated membrane protein 3 [Source:MGI Symbol;Acc:MGI:2441659] && sp|Q7TST5|LAMP3_MOUSE Lysosome-associated membrane glycoprotein 3 OS=Mus musculus OX=10090 GN=Lamp3 PE=2 SV=1 && PF01299:Lysosome-associated membrane glycoprotein (Lamp)	-
ENSMUSG00000106917	3.19475	5.03515	0	0	0	1.10319	2.7433	0.367729	3.01294	0.0825033	0.409527	Gm7832	5	91760696	91761575	-	880	processed_pseudogene	predicted gene 7832 [Source:MGI Symbol;Acc:MGI:3779767] && sp|P86223|VDAC2_MESAU Voltage-dependent anion-selective channel protein 2 OS=Mesocricetus auratus OX=10036 GN=VDAC2 PE=1 SV=2 && PF01459:Eukaryotic porin	-
ENSMUSG00000113349	1.06492	0	0	0.846203	2.75196	3.30956	0.354972	2.30258	-2.61733	0.082529	0.409527	Gm48369	12	36146183	36147922	-	1740	TEC	predicted gene, 48369 [Source:MGI Symbol;Acc:MGI:6097840] && - && -	-
ENSMUSG00000093390	1.06492	0	2.08629	7.61582	3.66928	1.10319	1.0504	4.12943	-2.00062	0.0825348	0.409527	Gm20652	3	88616457	88621061	-	383	antisense	predicted gene 20652 [Source:MGI Symbol;Acc:MGI:5313099] && - && -	-
ENSMUSG00000108940	2.12983	0	1.04314	4.23101	3.66928	3.30956	1.05766	3.73662	-1.83971	0.0825576	0.409527	Gm45719	7	130456012	130457673	-	1662	TEC	predicted gene 45719 [Source:MGI Symbol;Acc:MGI:5804834] && - && -	-
ENSMUSG00000100863	7.45441	4.02812	5.21572	6.76962	12.8425	13.2383	5.56608	10.9501	-0.971132	0.082601	1	Gm12669	4	91805547	91806555	-	1009	processed_pseudogene	predicted gene 12669 [Source:MGI Symbol;Acc:MGI:3651683] && sp|Q9CQM9|GLRX3_MOUSE Glutaredoxin-3 OS=Mus musculus OX=10090 GN=Glrx3 PE=1 SV=1 && -	-
ENSMUSG00000102923	0	0	1.04314	0.846203	1.83464	4.41275	0.347714	2.36453	-2.64866	0.0826118	1	Gm31728	1	180256429	180274963	+	435	antisense	predicted gene, 31728 [Source:MGI Symbol;Acc:MGI:5590887] && - && -	-
ENSMUSG00000083367	15.9737	6.04218	12.5177	22.0013	17.4291	18.7542	11.5112	19.3949	-0.758539	0.0826154	0.409612	Gm8806	X	80533745	80535151	-	1407	processed_pseudogene	predicted gene 8806 [Source:MGI Symbol;Acc:MGI:3643511] && sp|Q5FVM4|NONO_RAT Non-POU domain-containing octamer-binding protein OS=Rattus norvegicus OX=10116 GN=Nono PE=1 SV=3 && PF00076:RNA recognition motif. (a.k.a. RRM, RBD, or RNP domain)|PF08075:NOPS (NUC059) domain	-
ENSMUSG00000108655	5.32458	8.05624	4.17257	7.61582	15.5944	11.0319	5.85113	11.4141	-0.958728	0.0826533	0.409612	Gm44949	7	80088982	80090431	-	1450	antisense	predicted gene 44949 [Source:MGI Symbol;Acc:MGI:5753525] && sp|Q3U288|ZN710_MOUSE Zinc finger protein 710 OS=Mus musculus OX=10090 GN=Znf710 PE=2 SV=1 && -	-
ENSMUSG00000091227	0	1.00703	0	0.846203	2.75196	3.30956	0.335677	2.30258	-2.61738	0.082818	1	Gm3755	14	7440924	7450917	-	1462	protein_coding	predicted gene 3755 [Source:MGI Symbol;Acc:MGI:3781930] && - && PF04822:Takusan	-
ENSMUSG00000020286	0	1.00703	0	0.846203	2.75196	3.30956	0.335677	2.30258	-2.61738	0.0828195	0.409855	1700093K21Rik	11	23516203	23521155	-	2007	protein_coding	RIKEN cDNA 1700093K21 gene [Source:MGI Symbol;Acc:MGI:1914608] && sp|Q810S2|CB074_MOUSE Uncharacterized protein C2orf74 homolog OS=Mus musculus OX=10090 PE=2 SV=1 && PF15484:Domain of unknown function (DUF4642)	-
ENSMUSG00000025225	2802.86	2775.37	3358.92	2738.31	2561.16	2050.83	2979.05	2450.1	0.281779	0.08284	0.409855	Nfkb2	19	46304737	46312090	+	3289	protein_coding	nuclear factor of kappa light polypeptide gene enhancer in B cells 2, p49/p100 [Source:MGI Symbol;Acc:MGI:1099800] && sp|Q9WTK5|NFKB2_MOUSE Nuclear factor NF-kappa-B p100 subunit OS=Mus musculus OX=10090 GN=Nfkb2 PE=1 SV=1 && PF00531:Death domain|PF00554:Rel homology DNA-binding domain|PF12796:Ankyrin repeats (3 copies)|PF16179:Rel homology dimerisation domain	-
ENSMUSG00000025572	631.495	681.759	619.627	777.66	699.915	777.748	644.294	751.774	-0.22237	0.0828443	0.409855	Tmc6	11	117765988	117782198	-	4091	protein_coding	transmembrane channel-like gene family 6 [Source:MGI Symbol;Acc:MGI:1098686] && sp|Q7TN60|TMC6_MOUSE Transmembrane channel-like protein 6 OS=Mus musculus OX=10090 GN=Tmc6 PE=1 SV=2 && PF07810:TMC domain	-
ENSMUSG00000070687	1.06492	3.02109	1.04314	0	0	0	1.70972	0	3.29363	0.0828599	0.409855	Htr1d	4	136423524	136444398	+	3201	protein_coding	5-hydroxytryptamine (serotonin) receptor 1D [Source:MGI Symbol;Acc:MGI:96276] && sp|Q61224|5HT1D_MOUSE 5-hydroxytryptamine receptor 1D OS=Mus musculus OX=10090 GN=Htr1d PE=2 SV=2 && PF00001:7 transmembrane receptor (rhodopsin family)	-
ENSMUSG00000038347	8.51932	14.0984	8.34515	17.7703	18.3464	15.4446	10.321	17.1871	-0.735398	0.0829743	0.40998	Tcte2	17	13712444	13761825	-	4380	protein_coding	t-complex-associated testis expressed 2 [Source:MGI Symbol;Acc:MGI:98641] && - && -	-
ENSMUSG00000086328	19.1685	26.1828	9.38829	36.3867	23.8503	28.6829	18.2465	29.64	-0.700031	0.0829781	0.40998	2700033N17Rik	2	116066218	116067444	-	721	lincRNA	RIKEN cDNA 2700033N17 gene [Source:MGI Symbol;Acc:MGI:1919853] && - && -	-
ENSMUSG00000031449	10.6492	3.02109	2.08629	1.69241	2.75196	0	5.25218	1.48146	1.78504	0.083003	0.40998	Atp4b	8	13386205	13396825	-	1509	protein_coding	ATPase, H+/K+ exchanging, beta polypeptide [Source:MGI Symbol;Acc:MGI:88114] && sp|P50992|ATP4B_MOUSE Potassium-transporting ATPase subunit beta OS=Mus musculus OX=10090 GN=Atp4b PE=1 SV=1 && PF00287:Sodium / potassium ATPase beta chain	-
ENSMUSG00000114019	8.51932	3.02109	4.17257	11.0006	8.25588	12.1351	5.23766	10.4639	-1.0009	0.0832106	0.41061	Gm47155	13	93410783	93412957	+	2175	TEC	predicted gene, 47155 [Source:MGI Symbol;Acc:MGI:6095924] && - && -	-
ENSMUSG00000087605	0	0	0	4.23101	0	3.30956	0	2.51353	-3.71809	0.083254	0.41061	Gm15742	16	30969393	30973518	-	659	sense_intronic	predicted gene 15742 [Source:MGI Symbol;Acc:MGI:3783184] && - && -	-
ENSMUSG00000050702	0	2.01406	5.21572	0	0	0	2.40993	0	3.78683	0.0833	0.41061	4930563M21Rik	9	55962589	56010550	-	1924	protein_coding	RIKEN cDNA 4930563M21 gene [Source:MGI Symbol;Acc:MGI:1922508] && - && -	-
ENSMUSG00000110598	50.051	41.2882	52.1572	22.0013	30.2716	46.3339	47.8321	32.8689	0.551828	0.083327	0.41061	Gm45854	8	95468646	95472133	+	3488	TEC	predicted gene 45854 [Source:MGI Symbol;Acc:MGI:5804969] && - && -	-
ENSMUSG00000002718	2342.81	2386.66	2766.42	2162.05	2208.91	2068.48	2498.63	2146.48	0.219083	0.0833275	0.41061	Cse1l	2	166906040	166946389	+	5273	protein_coding	chromosome segregation 1-like (S. cerevisiae) [Source:MGI Symbol;Acc:MGI:1339951] && sp|Q9ERK4|XPO2_MOUSE Exportin-2 OS=Mus musculus OX=10090 GN=Cse1l PE=1 SV=1 && -	-
ENSMUSG00000058873	1.06492	0	0	1.69241	0.91732	4.41275	0.354972	2.34083	-2.63622	0.0835376	0.411451	Gm5582	6	131253528	131254049	-	522	processed_pseudogene	predicted gene 5582 [Source:MGI Symbol;Acc:MGI:3643463] && sp|Q93096|TP4A1_HUMAN Protein tyrosine phosphatase type IVA 1 OS=Homo sapiens OX=9606 GN=PTP4A1 PE=1 SV=2 && PF00782:Dual specificity phosphatase, catalytic domain	-
ENSMUSG00000107576	0	0	1.04314	1.69241	0.91732	4.41275	0.347714	2.34083	-2.63624	0.083697	0.411967	Gm44093	6	86961641	86963442	+	1802	TEC	predicted gene, 44093 [Source:MGI Symbol;Acc:MGI:5690485] && - && -	-
ENSMUSG00000022370	1125.62	1217.5	1230.91	1054.37	1081.52	918.956	1191.34	1018.28	0.226037	0.0837216	0.411967	Mrpl13	15	55534094	55557748	-	7936	protein_coding	mitochondrial ribosomal protein L13 [Source:MGI Symbol;Acc:MGI:2137218] && sp|Q9D1P0|RM13_MOUSE 39S ribosomal protein L13, mitochondrial OS=Mus musculus OX=10090 GN=Mrpl13 PE=1 SV=1 && -	-
ENSMUSG00000043079	244.931	264.849	207.586	203.089	214.653	137.899	239.122	185.213	0.366224	0.0839023	0.412571	Synpo	18	60593973	60660142	-	9533	protein_coding	synaptopodin [Source:MGI Symbol;Acc:MGI:1099446] && sp|Q8CC35|SYNPO_MOUSE Synaptopodin OS=Mus musculus OX=10090 GN=Synpo PE=1 SV=2 && -	-
ENSMUSG00000064340	12.779	1.00703	11.4746	29.6171	16.5118	9.92869	8.4202	18.6859	-1.16028	0.0839236	0.412571	mt-Tl1	MT	2676	2750	+	75	Mt_tRNA	mitochondrially encoded tRNA leucine 1 [Source:MGI Symbol;Acc:MGI:102482] && - && -	-
ENSMUSG00000028773	33.0124	36.2531	21.906	43.1563	37.6101	49.6435	30.3905	43.47	-0.512929	0.083979	0.412649	Fabp3	4	130308595	130315463	+	823	protein_coding	fatty acid binding protein 3, muscle and heart [Source:MGI Symbol;Acc:MGI:95476] && sp|P11404|FABPH_MOUSE Fatty acid-binding protein, heart OS=Mus musculus OX=10090 GN=Fabp3 PE=1 SV=5 && PF00061:Lipocalin / cytosolic fatty-acid binding protein family	-
ENSMUSG00000102562	11.7141	14.0984	12.5177	27.0785	12.8425	23.167	12.7767	21.0293	-0.718313	0.0840282	0.412656	Gm37694	16	77685277	77687409	+	2133	TEC	predicted gene, 37694 [Source:MGI Symbol;Acc:MGI:5610922] && - && -	-
novel.63	6.38949	4.02812	16.6903	10.1544	14.6771	30.8893	9.03597	18.5736	-1.03138	0.0840596	0.412656	-	14	103346940	103360482	+	559	-	- && - && -	-
ENSMUSG00000111380	1.06492	0	0	5.92342	2.75196	0	0.354972	2.89179	-2.97354	0.0841416	0.412776	D9Wsu149	9	57482976	57483569	+	594	processed_pseudogene	DNA segment, Chr 9, Wayne State University 149 [Source:MGI Symbol;Acc:MGI:107281] && sp|Q9D1N9|RM21_MOUSE 39S ribosomal protein L21, mitochondrial OS=Mus musculus OX=10090 GN=Mrpl21 PE=1 SV=1 && PF00829:Ribosomal prokaryotic L21 protein	-
ENSMUSG00000081451	3.19475	2.01406	5.21572	5.92342	6.42124	11.0319	3.47484	7.79218	-1.15584	0.0841432	1	Gm12734	11	77542133	77543080	+	948	processed_pseudogene	predicted gene 12734 [Source:MGI Symbol;Acc:MGI:3650213] && sp|P68102|IF2A_BOVIN Eukaryotic translation initiation factor 2 subunit 1 OS=Bos taurus OX=9913 GN=EIF2S1 PE=2 SV=2 && -	-
novel.198	5.32458	7.04921	15.6471	5.92342	11.0078	48.5403	9.34031	21.8238	-1.21384	0.0841773	1	-	6	136463722	136471496	+	1001	-	- && - && -	-
ENSMUSG00000083193	0	0	1.04314	5.92342	2.75196	0	0.347714	2.89179	-2.97352	0.0841971	0.412776	4930595D18Rik	12	111159850	111184491	-	818	protein_coding	RIKEN cDNA 4930595D18 gene [Source:MGI Symbol;Acc:MGI:1925312] && - && -	-
ENSMUSG00000074355	17.0386	15.1054	20.8629	28.7709	22.933	27.5797	17.669	26.4279	-0.581461	0.0842028	0.412776	Gm10676	7	18989554	18992774	-	3221	TEC	predicted gene 10676 [Source:MGI Symbol;Acc:MGI:3704283] && sp|Q8R4U1|MYPOP_MOUSE Myb-related transcription factor, partner of profilin OS=Mus musculus OX=10090 GN=Mypop PE=1 SV=1 && -	-
ENSMUSG00000108850	1.06492	1.00703	1.04314	1.69241	3.66928	5.51594	1.03836	3.62588	-1.78621	0.0842297	1	Gm44914	7	99568121	99570840	-	2720	TEC	predicted gene 44914 [Source:MGI Symbol;Acc:MGI:5753490] && - && -	-
ENSMUSG00000086925	9.58424	12.0844	8.34515	14.3854	33.0235	8.82551	10.0046	18.7448	-0.910983	0.0842663	1	Gm6286	1	166945597	166946358	-	762	processed_pseudogene	predicted gene 6286 [Source:MGI Symbol;Acc:MGI:3646153] && sp|P12970|RL7A_MOUSE 60S ribosomal protein L7a OS=Mus musculus OX=10090 GN=Rpl7a PE=1 SV=2 && -	-
ENSMUSG00000026247	1.06492	2.01406	3.12943	4.23101	3.66928	8.82551	2.06947	5.57527	-1.41184	0.0842968	1	Ecel1	1	87147655	87156521	-	3500	protein_coding	endothelin converting enzyme-like 1 [Source:MGI Symbol;Acc:MGI:1343461] && sp|Q9JMI0|ECEL1_MOUSE Endothelin-converting enzyme-like 1 OS=Mus musculus OX=10090 GN=Ecel1 PE=2 SV=2 && -	-
ENSMUSG00000044734	3.19475	3.02109	1.04314	7.61582	11.9252	1.10319	2.41966	6.88139	-1.52074	0.0843398	0.413118	Serpinb1a	13	32842092	32851185	-	2303	protein_coding	serine (or cysteine) peptidase inhibitor, clade B, member 1a [Source:MGI Symbol;Acc:MGI:1913472] && sp|Q9D154|ILEUA_MOUSE Leukocyte elastase inhibitor A OS=Mus musculus OX=10090 GN=Serpinb1a PE=1 SV=1 && PF00079:Serpin (serine protease inhibitor)	-
ENSMUSG00000087176	2.12983	3.02109	3.12943	0.846203	0	1.10319	2.76012	0.649797	2.11775	0.0843519	0.413118	D230022J07Rik	2	73386970	73420498	+	1062	processed_transcript	RIKEN cDNA D230022J07 gene [Source:MGI Symbol;Acc:MGI:2444095] && - && -	-
ENSMUSG00000060176	17.0386	10.0703	4.17257	18.6165	25.685	13.2383	10.4272	19.1799	-0.885557	0.0843977	0.413148	Kif27	13	58287502	58359122	-	5215	protein_coding	kinesin family member 27 [Source:MGI Symbol;Acc:MGI:1922300] && sp|Q7M6Z4|KIF27_MOUSE Kinesin-like protein KIF27 OS=Mus musculus OX=10090 GN=Kif27 PE=1 SV=1 && -	-
ENSMUSG00000073902	3.19475	6.04218	3.12943	1.69241	5.50392	27.5797	4.12212	11.592	-1.47337	0.0844771	1	Gm1966	7	106596743	106604035	-	7293	unprocessed_pseudogene	predicted gene 1966 [Source:MGI Symbol;Acc:MGI:3584360] && sp|Q80SU7|GVIN1_MOUSE Interferon-induced very large GTPase 1 OS=Mus musculus OX=10090 GN=Gvin1 PE=1 SV=1 && -	-
ENSMUSG00000004951	238.541	186.3	1323.75	276.708	236.669	408.18	582.863	307.186	0.924311	0.0845303	1	Hspb1	5	135887919	135889563	+	1031	protein_coding	heat shock protein 1 [Source:MGI Symbol;Acc:MGI:96240] && sp|P14602|HSPB1_MOUSE Heat shock protein beta-1 OS=Mus musculus OX=10090 GN=Hspb1 PE=1 SV=3 && -	-
ENSMUSG00000085360	2.12983	0	6.25886	0	0	1.10319	2.79623	0.367729	3.03723	0.0845837	1	Arhgap27os2	11	103355701	103361092	+	1390	antisense	Rho GTPase activating protein 27, opposite strand 2 [Source:MGI Symbol;Acc:MGI:3650160] && sp|A2AB59|RHG27_MOUSE Rho GTPase-activating protein 27 OS=Mus musculus OX=10090 GN=Arhgap27 PE=1 SV=1 && PF14604:Variant SH3 domain	-
ENSMUSG00000059854	0	0	2.08629	2.53861	0.91732	7.72232	0.695429	3.72608	-2.40958	0.0847317	0.414488	Hydin	8	110266977	110610253	+	18037	protein_coding	HYDIN, axonemal central pair apparatus protein [Source:MGI Symbol;Acc:MGI:2389007] && sp|Q80W93|HYDIN_MOUSE Hydrocephalus-inducing protein OS=Mus musculus OX=10090 GN=Hydin PE=1 SV=2 && PF17213:Hydin Adenylate kinase-like domain|PF15780:Abnormal spindle-like microcephaly-assoc'd, ASPM-SPD-2-Hydin	-
ENSMUSG00000039382	343.968	364.545	346.324	291.094	315.558	290.139	351.612	298.93	0.234044	0.0847508	0.414488	Wdr45	X	7714333	7728206	+	3310	protein_coding	WD repeat domain 45 [Source:MGI Symbol;Acc:MGI:1859606] && sp|Q91VM3|WIPI4_MOUSE WD repeat domain phosphoinositide-interacting protein 4 OS=Mus musculus OX=10090 GN=Wdr45 PE=1 SV=1 && -	-
ENSMUSG00000112237	20.2334	25.1757	19.8197	15.2316	12.8425	14.3414	21.743	14.1385	0.62131	0.0848243	0.414652	D630033A02Rik	10	122985074	122986555	-	1482	transcribed_processed_pseudogene	RIKEN cDNA D630033A02 gene [Source:MGI Symbol;Acc:MGI:3028060] && - && -	-
ENSMUSG00000052928	455.784	498.48	451.681	522.107	500.857	721.485	468.648	581.483	-0.310108	0.0848813	0.414736	Ctif	18	75431224	75697696	-	6173	protein_coding	CBP80/20-dependent translation initiation factor [Source:MGI Symbol;Acc:MGI:2685518] && sp|Q6PEE2|CTIF_MOUSE CBP80/20-dependent translation initiation factor OS=Mus musculus OX=10090 GN=Ctif PE=1 SV=2 && -	-
ENSMUSG00000051146	57.5054	92.6467	78.2357	55.0032	52.2873	62.8817	76.1293	56.7241	0.427908	0.0849282	1	Camk2n2	16	20619215	20621287	-	1291	protein_coding	calcium/calmodulin-dependent protein kinase II inhibitor 2 [Source:MGI Symbol;Acc:MGI:1920297] && sp|Q78WH7|CK2N2_MOUSE Calcium/calmodulin-dependent protein kinase II inhibitor 2 OS=Mus musculus OX=10090 GN=Camk2n2 PE=1 SV=1 && -	-
ENSMUSG00000113611	1.06492	0	0	1.69241	7.33856	0	0.354972	3.01032	-3.02471	0.0849839	0.414918	Gm47750	12	26150316	26150513	+	198	processed_pseudogene	predicted gene, 47750 [Source:MGI Symbol;Acc:MGI:6096894] && sp|P18687|CH60_CRIGR 60 kDa heat shock protein, mitochondrial OS=Cricetulus griseus OX=10029 GN=HSPD1 PE=2 SV=1 && -	-
ENSMUSG00000056043	2.12983	0	2.08629	5.07722	3.66928	4.41275	1.40537	4.38642	-1.65485	0.0849981	0.414918	Rgs9bp	7	35578993	35585582	-	6590	protein_coding	regulator of G-protein signalling 9 binding protein [Source:MGI Symbol;Acc:MGI:2384418] && sp|Q148R9|R9BP_MOUSE Regulator of G-protein signaling 9-binding protein OS=Mus musculus OX=10090 GN=Rgs9bp PE=1 SV=2 && -	-
ENSMUSG00000028699	3.19475	1.00703	1.04314	5.92342	13.7598	0	1.74831	6.56107	-1.92252	0.0851255	0.415345	Tspan1	4	116161869	116167601	-	2329	protein_coding	tetraspanin 1 [Source:MGI Symbol;Acc:MGI:1914055] && sp|Q99J59|TSN1_MOUSE Tetraspanin-1 OS=Mus musculus OX=10090 GN=Tspan1 PE=2 SV=1 && PF00335:Tetraspanin family	-
ENSMUSG00000097567	11.7141	16.1125	25.0354	10.1544	13.7598	5.51594	17.6207	9.81006	0.832899	0.0851785	0.415409	Gm26637	17	78882042	78892500	+	2289	lincRNA	predicted gene, 26637 [Source:MGI Symbol;Acc:MGI:5477131] && sp|P0CC03|ST6B1_MOUSE Sulfotransferase 6B1 OS=Mus musculus OX=10090 GN=Sult6b1 PE=1 SV=1 && -	-
ENSMUSG00000036305	26.6229	38.2671	39.6394	50.7722	44.0314	49.6435	34.8432	48.149	-0.465224	0.085268	0.415652	Rpl39-ps	15	102635038	102635188	+	151	processed_pseudogene	ribosomal protein L39, pseudogene [Source:MGI Symbol;Acc:MGI:3705781] && sp|Q3T051|RL39_BOVIN 60S ribosomal protein L39 OS=Bos taurus OX=9913 GN=RPL39 PE=3 SV=3 && -	-
ENSMUSG00000109647	3.19475	5.03515	0	12.693	7.33856	3.30956	2.7433	7.78039	-1.51055	0.0853848	0.415791	Gm45510	7	16413908	16416621	-	638	antisense	predicted gene 45510 [Source:MGI Symbol;Acc:MGI:5791346] && - && -	-
ENSMUSG00000028989	5.32458	2.01406	3.12943	12.693	8.25588	3.30956	3.48936	8.08616	-1.23306	0.085399	0.415791	Angptl7	4	148495183	148500460	-	2157	protein_coding	angiopoietin-like 7 [Source:MGI Symbol;Acc:MGI:3605801] && sp|Q8R1Q3|ANGL7_MOUSE Angiopoietin-related protein 7 OS=Mus musculus OX=10090 GN=Angptl7 PE=2 SV=1 && PF00147:Fibrinogen beta and gamma chains, C-terminal globular domain	-
ENSMUSG00000036466	34.0773	32.2249	29.208	50.7722	32.1062	52.953	31.8368	45.2771	-0.505991	0.0854362	0.415791	Megf11	9	64385626	64709205	+	11181	protein_coding	multiple EGF-like-domains 11 [Source:MGI Symbol;Acc:MGI:1920951] && sp|Q80T91|MEG11_MOUSE Multiple epidermal growth factor-like domains protein 11 OS=Mus musculus OX=10090 GN=Megf11 PE=1 SV=3 && -	-
ENSMUSG00000021892	402.538	493.445	481.932	555.109	522.873	557.11	459.305	545.031	-0.246577	0.0854561	0.415791	Sh3bp5	14	31359880	31436078	-	3194	protein_coding	SH3-domain binding protein 5 (BTK-associated) [Source:MGI Symbol;Acc:MGI:1344391] && sp|Q9Z131|3BP5_MOUSE SH3 domain-binding protein 5 OS=Mus musculus OX=10090 GN=Sh3bp5 PE=1 SV=3 && PF05276:SH3 domain-binding protein 5 (SH3BP5)	-
ENSMUSG00000022490	1.06492	1.00703	2.08629	0.846203	4.5866	8.82551	1.38608	4.75277	-1.75761	0.0855258	0.415831	Ppp1r1a	15	103530279	103538003	-	1306	protein_coding	protein phosphatase 1, regulatory inhibitor subunit 1A [Source:MGI Symbol;Acc:MGI:1889595] && sp|Q9ERT9|PPR1A_MOUSE Protein phosphatase 1 regulatory subunit 1A OS=Mus musculus OX=10090 GN=Ppp1r1a PE=1 SV=1 && PF05395:Protein phosphatase inhibitor 1/DARPP-32	-
ENSMUSG00000026889	1087.28	1121.83	1200.66	959.594	1035.65	959.774	1136.59	985.007	0.206438	0.0855798	0.415831	Rbm18	2	36116079	36136773	-	5834	protein_coding	RNA binding motif protein 18 [Source:MGI Symbol;Acc:MGI:1915139] && sp|Q9CR83|RBM18_MOUSE Probable RNA-binding protein 18 OS=Mus musculus OX=10090 GN=Rbm18 PE=2 SV=1 && -	-
ENSMUSG00000085862	4.25966	8.05624	7.302	4.23101	1.83464	2.20638	6.5393	2.75734	1.23042	0.0855841	0.415831	Gm13483	2	50296810	50433967	+	1811	lincRNA	predicted gene 13483 [Source:MGI Symbol;Acc:MGI:3651423] && - && -	-
ENSMUSG00000077202	0	4.02812	0	2.53861	8.25588	5.51594	1.34271	5.43681	-1.99847	0.0855994	1	Gm25612	1	134505338	134505463	+	126	snoRNA	predicted gene, 25612 [Source:MGI Symbol;Acc:MGI:5455389] && - && -	-
ENSMUSG00000117310	58.5703	63.4429	61.5455	43.1563	52.2873	44.1275	61.1862	46.5237	0.394933	0.085683	0.416044	Ptp4a1	1	30940302	30949770	-	4145	protein_coding	protein tyrosine phosphatase 4a1 [Source:NCBI gene;Acc:19243] && sp|Q93096|TP4A1_HUMAN Protein tyrosine phosphatase type IVA 1 OS=Homo sapiens OX=9606 GN=PTP4A1 PE=1 SV=2 && -	-
ENSMUSG00000033149	2193.73	2206.4	2667.32	2154.43	2058.47	1463.93	2355.81	1892.28	0.315792	0.0857093	0.416044	Phldb2	16	45746243	45953598	-	7577	protein_coding	pleckstrin homology like domain, family B, member 2 [Source:MGI Symbol;Acc:MGI:2444981] && sp|Q8K1N2|PHLB2_MOUSE Pleckstrin homology-like domain family B member 2 OS=Mus musculus OX=10090 GN=Phldb2 PE=1 SV=2 && PF00169:PH domain	-
ENSMUSG00000020310	3.19475	2.01406	9.38829	0.846203	1.83464	2.20638	4.8657	1.62907	1.60026	0.0858356	0.416044	Madcam1	10	79664559	79668537	+	1436	protein_coding	mucosal vascular addressin cell adhesion molecule 1 [Source:MGI Symbol;Acc:MGI:103579] && sp|Q61826|MADCA_MOUSE Mucosal addressin cell adhesion molecule 1 OS=Mus musculus OX=10090 GN=Madcam1 PE=1 SV=2 && PF09085:Adhesion molecule, immunoglobulin-like	-
ENSMUSG00000103711	19.1685	10.0703	3.12943	24.5399	28.4369	11.0319	10.7894	21.3362	-0.991223	0.0858516	0.416044	Tstd1	1	171418872	171420352	+	867	protein_coding	thiosulfate sulfurtransferase (rhodanese)-like domain containing 1 [Source:MGI Symbol;Acc:MGI:3648482] && sp|Q8NFU3|TSTD1_HUMAN Thiosulfate:glutathione sulfurtransferase OS=Homo sapiens OX=9606 GN=TSTD1 PE=1 SV=3 && PF00581:Rhodanese-like domain	-
ENSMUSG00000085396	1016.99	1092.63	823.04	1130.53	1137.48	1248.81	977.554	1172.27	-0.261798	0.0858616	0.416044	Firre	X	50555744	50635321	-	8247	processed_transcript	functional intergenic repeating RNA element [Source:MGI Symbol;Acc:MGI:2147989] && - && -	-
ENSMUSG00000107698	3.19475	3.02109	1.04314	11.0006	8.25588	1.10319	2.41966	6.78657	-1.50411	0.085886	0.416044	Gm44430	6	88519013	88520007	+	995	TEC	predicted gene, 44430 [Source:MGI Symbol;Acc:MGI:5690822] && - && -	-
ENSMUSG00000049692	0	6.04218	1.04314	11.8468	9.1732	2.20638	2.36177	7.74214	-1.71119	0.0859446	0.416044	Tmem239	2	130406478	130407902	+	1291	protein_coding	transmembrane 239 [Source:MGI Symbol;Acc:MGI:1914016] && sp|Q9DA47|TM239_MOUSE Transmembrane protein 239 OS=Mus musculus OX=10090 GN=Tmem239 PE=2 SV=1 && PF15841:Transmembrane protein 239 family	-
ENSMUSG00000030157	26.6229	35.246	29.208	66.0038	47.7007	25.3733	30.359	46.3593	-0.617376	0.0859473	0.416044	Clec2d	6	129180615	129186534	+	1213	protein_coding	C-type lectin domain family 2, member d [Source:MGI Symbol;Acc:MGI:2135589] && sp|Q91V08|CLC2D_MOUSE C-type lectin domain family 2 member D OS=Mus musculus OX=10090 GN=Clec2d PE=1 SV=1 && PF00059:Lectin C-type domain	-
ENSMUSG00000086382	1.06492	0	0	0	5.50392	3.30956	0.354972	2.93783	-2.97643	0.0860232	0.416218	Chrna1os	2	73584850	73589208	+	701	antisense	cholinergic receptor, nicotinic, alpha polypeptide 1 (muscle), opposite strand [Source:MGI Symbol;Acc:MGI:3651120] && - && -	-
ENSMUSG00000102573	0	5.03515	8.34515	0.846203	1.83464	0	4.4601	0.893614	2.287	0.0861275	0.416529	Gm7265	9	72691549	72695050	+	3502	TEC	predicted gene 7265 [Source:MGI Symbol;Acc:MGI:3648991] && sp|P46934|NEDD4_HUMAN E3 ubiquitin-protein ligase NEDD4 OS=Homo sapiens OX=9606 GN=NEDD4 PE=1 SV=4 && -	-
ENSMUSG00000030823	22.3632	26.1828	30.2512	35.5405	29.3543	50.7467	26.2657	38.5471	-0.546499	0.0861771	0.416576	9130019O22Rik	7	127382260	127387166	-	3878	protein_coding	RIKEN cDNA 9130019O22 gene [Source:MGI Symbol;Acc:MGI:1926171] && sp|Q96H86|ZN764_HUMAN Zinc finger protein 764 OS=Homo sapiens OX=9606 GN=ZNF764 PE=1 SV=2 && PF00096:Zinc finger, C2H2 type|PF01352:KRAB box	-
ENSMUSG00000037621	21.2983	36.2531	25.0354	20.3089	21.0984	9.92869	27.5289	17.112	0.675394	0.0862521	0.416596	Atoh8	6	72206177	72235577	-	2507	protein_coding	atonal bHLH transcription factor 8 [Source:MGI Symbol;Acc:MGI:1918343] && sp|Q99NA2|ATOH8_MOUSE Protein atonal homolog 8 OS=Mus musculus OX=10090 GN=Atoh8 PE=1 SV=1 && PF00010:Helix-loop-helix DNA-binding domain	-
ENSMUSG00000035032	0	2.01406	6.25886	0	0	1.10319	2.75764	0.367729	3.01956	0.0862696	0.416596	Nek11	9	105162156	105395524	-	4246	protein_coding	NIMA (never in mitosis gene a)-related expressed kinase 11 [Source:MGI Symbol;Acc:MGI:2442276] && sp|Q8C0Q4|NEK11_MOUSE Serine/threonine-protein kinase Nek11 OS=Mus musculus OX=10090 GN=Nek11 PE=2 SV=2 && PF00069:Protein kinase domain	-
ENSMUSG00000081926	24.4931	9.06327	14.604	32.1557	17.4291	30.8893	16.0534	26.8247	-0.742854	0.0863011	0.416596	Gm15536	10	7038661	7038774	+	114	processed_pseudogene	predicted gene 15536 [Source:MGI Symbol;Acc:MGI:3782984] && sp|Q3T0V4|RS11_BOVIN 40S ribosomal protein S11 OS=Bos taurus OX=9913 GN=RPS11 PE=2 SV=3 && -	-
ENSMUSG00000092202	0	5.03515	6.25886	5.92342	3.66928	24.2701	3.76467	11.2876	-1.56948	0.086333	1	Stk19-ps1	17	34744753	34747154	-	517	unprocessed_pseudogene	serine/threonine kinase 19, pseudogene 1 [Source:MGI Symbol;Acc:MGI:2148500] && sp|Q9JHN8|STK19_MOUSE Serine/threonine-protein kinase 19 OS=Mus musculus OX=10090 GN=Stk19 PE=2 SV=2 && PF10494:Serine-threonine protein kinase 19	-
ENSMUSG00000105304	4.25966	3.02109	14.604	9.30823	9.1732	30.8893	7.29492	16.4569	-1.16457	0.0863943	0.416672	Gm43696	3	104470660	104476730	-	6071	sense_intronic	predicted gene 43696 [Source:MGI Symbol;Acc:MGI:5663833] && - && -	-
ENSMUSG00000072663	10.6492	12.0844	18.7766	5.07722	5.50392	12.1351	13.8367	7.57207	0.892956	0.0863968	0.416672	Spef2	15	9578193	9748868	-	9916	protein_coding	sperm flagellar 2 [Source:MGI Symbol;Acc:MGI:2443727] && sp|Q8C9J3|SPEF2_MOUSE Sperm flagellar protein 2 OS=Mus musculus OX=10090 GN=Spef2 PE=1 SV=3 && PF00406:Adenylate kinase|PF06294:CH-like domain in sperm protein	-
ENSMUSG00000026035	232.152	258.807	233.664	209.858	199.976	197.471	241.541	202.435	0.254453	0.0864637	0.416732	Ppil3	1	58430994	58445486	-	4291	protein_coding	peptidylprolyl isomerase (cyclophilin)-like 3 [Source:MGI Symbol;Acc:MGI:1917475] && sp|Q9D6L8|PPIL3_MOUSE Peptidyl-prolyl cis-trans isomerase-like 3 OS=Mus musculus OX=10090 GN=Ppil3 PE=1 SV=1 && -	-
ENSMUSG00000025854	559.081	504.522	486.105	544.108	529.294	1014.93	516.569	696.112	-0.429516	0.0865227	0.416732	Fam20c	5	138754514	138810077	+	6590	protein_coding	family with sequence similarity 20, member C [Source:MGI Symbol;Acc:MGI:2136853] && sp|Q5MJS3|FA20C_MOUSE Extracellular serine/threonine protein kinase FAM20C OS=Mus musculus OX=10090 GN=Fam20c PE=1 SV=1 && -	-
ENSMUSG00000106891	1.06492	5.03515	6.25886	3.38481	7.33856	20.9606	4.11964	10.5613	-1.33974	0.0865293	0.416732	Gm43460	5	147428830	147429886	+	1057	TEC	predicted gene 43460 [Source:MGI Symbol;Acc:MGI:5663597] && - && -	-
ENSMUSG00000104642	0	1.00703	1.04314	2.53861	5.50392	1.10319	0.683391	3.04857	-2.15837	0.0865826	0.416796	Gm9207	3	96454835	96455949	-	1115	processed_pseudogene	predicted gene 9207 [Source:MGI Symbol;Acc:MGI:3779840] && sp|Q8K0V4|CNOT3_MOUSE CCR4-NOT transcription complex subunit 3 OS=Mus musculus OX=10090 GN=Cnot3 PE=1 SV=1 && -	-
ENSMUSG00000100454	55.3756	54.3796	34.4237	43.1563	33.0235	13.2383	48.0596	29.806	0.678868	0.0867577	0.41687	Gm28901	1	97024516	97025565	-	474	lincRNA	predicted gene 28901 [Source:MGI Symbol;Acc:MGI:5579607] && sp|Q9Z2X1|HNRPF_MOUSE Heterogeneous nuclear ribonucleoprotein F OS=Mus musculus OX=10090 GN=Hnrnpf PE=1 SV=3 && -	-
ENSMUSG00000091058	1.06492	3.02109	2.08629	0	0	1.10319	2.05743	0.367729	2.59923	0.0867615	0.41687	Gm17538	17	77674376	77674702	-	327	processed_pseudogene	predicted gene, 17538 [Source:MGI Symbol;Acc:MGI:4937172] && sp|Q93008|USP9X_HUMAN Probable ubiquitin carboxyl-terminal hydrolase FAF-X OS=Homo sapiens OX=9606 GN=USP9X PE=1 SV=4 && -	-
ENSMUSG00000007030	25.558	24.1687	29.208	33.0019	33.9409	45.2307	26.3116	37.3912	-0.501501	0.0867621	0.41687	Vwa7	17	35016579	35026741	+	4313	protein_coding	von Willebrand factor A domain containing 7 [Source:MGI Symbol;Acc:MGI:1306798] && sp|Q9JHA8|VWA7_MOUSE von Willebrand factor A domain-containing protein 7 OS=Mus musculus OX=10090 GN=Vwa7 PE=2 SV=1 && -	-
ENSMUSG00000108520	3.19475	5.03515	0	7.61582	4.5866	9.92869	2.7433	7.37704	-1.41713	0.0867673	1	Gm44684	7	27674659	27677844	-	2926	processed_transcript	predicted gene 44684 [Source:MGI Symbol;Acc:MGI:5753260] && - && -	-
ENSMUSG00000073242	8.51932	2.01406	0	8.46203	15.5944	5.51594	3.51113	9.85747	-1.49907	0.0868269	0.41687	Dnmt3aos	12	3859293	3862244	-	1385	antisense	DNA methyltransferase 3A, opposite strand [Source:MGI Symbol;Acc:MGI:3641689] && - && -	-
ENSMUSG00000114293	0	0	1.04314	0.846203	3.66928	2.20638	0.347714	2.24062	-2.58653	0.0868589	0.41687	Gm48078	13	76439331	76439670	+	340	processed_pseudogene	predicted gene, 48078 [Source:MGI Symbol;Acc:MGI:6097415] && sp|Q6ZQK5|ACAP2_MOUSE Arf-GAP with coiled-coil, ANK repeat and PH domain-containing protein 2 OS=Mus musculus OX=10090 GN=Acap2 PE=1 SV=2 && -	-
ENSMUSG00000033871	120.335	92.6467	102.228	134.546	126.59	131.279	105.07	130.805	-0.316946	0.0868763	0.41687	Ppargc1b	18	61298136	61400431	-	3990	protein_coding	peroxisome proliferative activated receptor, gamma, coactivator 1 beta [Source:MGI Symbol;Acc:MGI:2444934] && sp|Q8VHJ7|PRGC2_MOUSE Peroxisome proliferator-activated receptor gamma coactivator 1-beta OS=Mus musculus OX=10090 GN=Ppargc1b PE=1 SV=1 && PF00076:RNA recognition motif. (a.k.a. RRM, RBD, or RNP domain)	-
ENSMUSG00000086015	19.1685	10.0703	11.4746	3.38481	11.9252	5.51594	13.5711	6.94197	0.965622	0.0868779	0.41687	4833417C18Rik	11	95858865	95861044	+	1269	processed_transcript	RIKEN cDNA 4833417C18 gene [Source:MGI Symbol;Acc:MGI:1921156] && - && -	-
ENSMUSG00000110326	0	1.00703	0	0.846203	3.66928	2.20638	0.335677	2.24062	-2.58654	0.0870427	0.417405	Gm45378	7	111090106	111092816	-	2711	TEC	predicted gene 45378 [Source:MGI Symbol;Acc:MGI:5791214] && - && -	-
ENSMUSG00000045532	5.32458	3.02109	5.21572	13.5392	7.33856	6.61913	4.52046	9.16564	-1.0339	0.0870983	0.417405	C1ql1	11	102939264	102946688	-	1473	protein_coding	complement component 1, q subcomponent-like 1 [Source:MGI Symbol;Acc:MGI:1344400] && sp|O88992|C1QRF_MOUSE C1q-related factor OS=Mus musculus OX=10090 GN=C1ql1 PE=1 SV=2 && PF01391:Collagen triple helix repeat (20 copies)|PF00386:C1q domain	-
ENSMUSG00000021874	39.4019	33.232	11.4746	21.1551	16.5118	2.20638	28.0361	13.2911	1.06317	0.0871364	0.417405	4933413J09Rik	14	26356574	26400456	+	4837	lincRNA	RIKEN cDNA 4933413J09 gene [Source:MGI Symbol;Acc:MGI:1918356] && - && -	-
ENSMUSG00000043333	81.9985	44.3093	68.8475	61.7728	39.4448	29.7861	65.0517	43.6679	0.567412	0.0871497	0.417405	Rhbdl2	4	123787874	123829904	+	3070	protein_coding	rhomboid like 2 [Source:MGI Symbol;Acc:MGI:3608413] && sp|A2AGA4|RHBL2_MOUSE Rhomboid-related protein 2 OS=Mus musculus OX=10090 GN=Rhbdl2 PE=1 SV=1 && -	-
ENSMUSG00000045414	343.968	355.481	476.716	328.327	272.444	343.092	392.055	314.621	0.317888	0.0871952	1	1190002N15Rik	9	94517864	94538081	-	3950	protein_coding	RIKEN cDNA 1190002N15 gene [Source:MGI Symbol;Acc:MGI:1916111] && sp|Q3USZ8|DIK2A_MOUSE Divergent protein kinase domain 2A OS=Mus musculus OX=10090 GN=Dipk2a PE=1 SV=2 && PF12260:Protein-kinase domain of FAM69	-
ENSMUSG00000082087	26.6229	14.0984	43.812	19.4627	11.9252	18.7542	28.1778	16.714	0.753403	0.0872313	0.417605	Gm12138	11	40672906	40673856	-	951	processed_pseudogene	predicted gene 12138 [Source:MGI Symbol;Acc:MGI:3651749] && sp|P45376|ALDR_MOUSE Aldo-keto reductase family 1 member B1 OS=Mus musculus OX=10090 GN=Akr1b1 PE=1 SV=3 && PF00248:Aldo/keto reductase family	-
ENSMUSG00000106815	1.06492	3.02109	2.08629	0.846203	0	0	2.05743	0.282068	2.59918	0.0873635	0.418045	Gm43658	5	76297600	76301775	-	4176	TEC	predicted gene 43658 [Source:MGI Symbol;Acc:MGI:5663795] && - && -	-
ENSMUSG00000097174	10.6492	16.1125	12.5177	16.9241	22.933	22.0638	13.0931	20.6403	-0.650892	0.0873748	1	Gm4890	8	79295123	79308961	+	3784	bidirectional_promoter_lncRNA	predicted gene 4890 [Source:MGI Symbol;Acc:MGI:3779445] && - && -	-
ENSMUSG00000106946	0	0	1.04314	0.846203	0.91732	5.51594	0.347714	2.42649	-2.68199	0.0875571	0.418451	Gm42856	6	24657518	24660369	-	2852	TEC	predicted gene 42856 [Source:MGI Symbol;Acc:MGI:5662993] && - && -	-
ENSMUSG00000053329	174.646	171.195	232.621	203.935	257.767	268.075	192.821	243.259	-0.334097	0.0875605	0.418451	D10Jhu81e	10	78162066	78169782	-	2527	protein_coding	DNA segment, Chr 10, Johns Hopkins University 81 expressed [Source:MGI Symbol;Acc:MGI:1351861] && sp|Q9D172|GAL3A_MOUSE Glutamine amidotransferase-like class 1 domain-containing protein 3A, mitochondrial OS=Mus musculus OX=10090 GN=Gatd3a PE=1 SV=1 && -	-
ENSMUSG00000039007	155.478	134.942	159.601	144.701	102.74	105.906	150.007	117.782	0.345974	0.0875689	0.418451	Cpq	15	33083129	33594552	+	5026	protein_coding	carboxypeptidase Q [Source:MGI Symbol;Acc:MGI:1889205] && sp|Q9WVJ3|CBPQ_MOUSE Carboxypeptidase Q OS=Mus musculus OX=10090 GN=Cpq PE=1 SV=1 && -	-
ENSMUSG00000100162	0	1.00703	0	0.846203	0.91732	5.51594	0.335677	2.42649	-2.68204	0.0876538	1	Gm20687	14	55054945	55098986	+	4545	antisense	predicted gene 20687 [Source:MGI Symbol;Acc:MGI:5313134] && sp|Q2MHN3|ZFHX2_MOUSE Zinc finger homeobox protein 2 OS=Mus musculus OX=10090 GN=Zfhx2 PE=1 SV=1 && -	-
ENSMUSG00000090290	715.623	622.344	551.823	528.03	564.152	482.093	629.93	524.759	0.262993	0.0877081	0.418756	Tarbp1	8	126425329	126475065	-	6383	protein_coding	TAR RNA binding protein 1 [Source:MGI Symbol;Acc:MGI:4936930] && sp|Q13395|TARB1_HUMAN Probable methyltransferase TARBP1 OS=Homo sapiens OX=9606 GN=TARBP1 PE=1 SV=1 && PF00588:SpoU rRNA Methylase family	-
ENSMUSG00000073563	798.687	801.596	795.918	679.501	695.329	719.279	798.733	698.036	0.194724	0.0877354	0.418756	Csnk1g3	18	53862113	53955684	+	4394	protein_coding	casein kinase 1, gamma 3 [Source:MGI Symbol;Acc:MGI:1917675] && sp|Q8C4X2|KC1G3_MOUSE Casein kinase I isoform gamma-3 OS=Mus musculus OX=10090 GN=Csnk1g3 PE=1 SV=2 && PF00069:Protein kinase domain|PF12605:Casein kinase 1 gamma C terminal	-
ENSMUSG00000094724	45.7914	20.1406	16.6903	14.3854	22.933	9.92869	27.5407	15.749	0.798508	0.0877532	0.418756	Rnaset2b	17	6970634	7011299	+	4455	protein_coding	ribonuclease T2B [Source:MGI Symbol;Acc:MGI:3702087] && sp|C0HKG5|RNT2A_MOUSE Ribonuclease T2-A OS=Mus musculus OX=10090 GN=Rnaset2a PE=1 SV=1 && -	-
ENSMUSG00000103864	0	0	0	3.38481	3.66928	0	0	2.35136	-3.63086	0.0878419	0.418988	Gm37415	5	124424697	124426879	+	2183	TEC	predicted gene, 37415 [Source:MGI Symbol;Acc:MGI:5610643] && - && -	-
ENSMUSG00000095266	0	0	0	3.38481	3.66928	0	0	2.35136	-3.63086	0.08793	0.419216	Gm5225	17	24023859	24024182	+	324	protein_coding	predicted gene 5225 [Source:MGI Symbol;Acc:MGI:3779476] && sp|Q61171|PRDX2_MOUSE Peroxiredoxin-2 OS=Mus musculus OX=10090 GN=Prdx2 PE=1 SV=3 && PF00578:AhpC/TSA family	-
ENSMUSG00000044807	67.0897	85.5975	82.4083	55.0032	76.1376	36.4052	78.3652	55.8487	0.484041	0.0879973	0.419222	Zfp354c	11	50811086	50827724	-	5596	protein_coding	zinc finger protein 354C [Source:MGI Symbol;Acc:MGI:1353621] && sp|Q571J5|Z354C_MOUSE Zinc finger protein 354C OS=Mus musculus OX=10090 GN=Znf354c PE=2 SV=2 && PF01352:KRAB box|PF00096:Zinc finger, C2H2 type	-
ENSMUSG00000081787	25.558	26.1828	25.0354	38.9253	26.6023	45.2307	25.5921	36.9194	-0.52438	0.0880117	0.419222	Gm13991	2	116527843	116528490	-	648	processed_pseudogene	predicted gene 13991 [Source:MGI Symbol;Acc:MGI:3651689] && sp|P61020|RAB5B_HUMAN Ras-related protein Rab-5B OS=Homo sapiens OX=9606 GN=RAB5B PE=1 SV=1 && PF00071:Ras family	-
ENSMUSG00000018543	22.3632	32.2249	7.302	9.30823	16.5118	1.10319	20.6301	8.97439	1.18847	0.0880977	1	1700001P01Rik	11	97771481	97775918	-	624	protein_coding	RIKEN cDNA 1700001P01 gene [Source:MGI Symbol;Acc:MGI:1919465] && sp|Q9DAQ5|CQ098_MOUSE Uncharacterized protein C17orf98 homolog OS=Mus musculus OX=10090 PE=2 SV=1 && PF15075:Domain of unknown function (DUF4542)	-
ENSMUSG00000060548	38.337	30.2109	64.6749	31.3095	31.1889	27.5797	44.4076	30.026	0.56193	0.0881191	0.419332	Tnfrsf19	14	60963875	61046490	-	4738	protein_coding	tumor necrosis factor receptor superfamily, member 19 [Source:MGI Symbol;Acc:MGI:1352474] && sp|Q9JLL3|TNR19_MOUSE Tumor necrosis factor receptor superfamily member 19 OS=Mus musculus OX=10090 GN=Tnfrsf19 PE=1 SV=2 && -	-
ENSMUSG00000043670	2.12983	2.01406	4.17257	0	0.91732	1.10319	2.77215	0.673503	2.09741	0.0881383	0.419332	Diras1	10	81019589	81025662	-	3035	protein_coding	DIRAS family, GTP-binding RAS-like 1 [Source:MGI Symbol;Acc:MGI:2183442] && sp|Q91Z61|DIRA1_MOUSE GTP-binding protein Di-Ras1 OS=Mus musculus OX=10090 GN=Diras1 PE=1 SV=1 && -	-
ENSMUSG00000106625	0	1.00703	0	2.53861	2.75196	1.10319	0.335677	2.13125	-2.52958	0.0881452	1	Gm43344	3	27546641	27547869	+	1229	TEC	predicted gene 43344 [Source:MGI Symbol;Acc:MGI:5663481] && - && -	-
ENSMUSG00000108506	1.06492	7.04921	4.17257	0.846203	1.83464	1.10319	4.09557	1.26134	1.7046	0.0881692	0.419332	Gm44705	7	79790287	79790625	-	339	processed_pseudogene	predicted gene 44705 [Source:MGI Symbol;Acc:MGI:5753281] && sp|P48024|EIF1_MOUSE Eukaryotic translation initiation factor 1 OS=Mus musculus OX=10090 GN=Eif1 PE=1 SV=2 && PF01253:Translation initiation factor SUI1	-
ENSMUSG00000104392	4.25966	1.00703	0	5.92342	5.50392	4.41275	1.75556	5.28003	-1.60182	0.0882102	0.419332	Gm37962	9	101113805	101115838	+	2034	TEC	predicted gene, 37962 [Source:MGI Symbol;Acc:MGI:5611190] && - && -	-
ENSMUSG00000042564	35.1422	39.2742	16.6903	21.1551	17.4291	19.8574	30.3689	19.4805	0.640842	0.088236	0.419332	Fam227a	15	79609576	79658956	-	9222	protein_coding	family with sequence similarity 227, member A [Source:MGI Symbol;Acc:MGI:1922979] && sp|F5H4B4|F227A_HUMAN Protein FAM227A OS=Homo sapiens OX=9606 GN=FAM227A PE=1 SV=1 && -	-
ENSMUSG00000042073	90.5178	102.717	76.1495	77.0044	74.3029	51.8498	89.7948	67.7191	0.402391	0.0883193	0.419349	Abhd14b	9	106447459	106452923	+	2671	protein_coding	abhydrolase domain containing 14b [Source:MGI Symbol;Acc:MGI:1923741] && sp|Q8VCR7|ABHEB_MOUSE Protein ABHD14B OS=Mus musculus OX=10090 GN=Abhd14b PE=1 SV=1 && -	-
ENSMUSG00000078773	380.175	402.812	501.752	384.176	368.763	271.384	428.246	341.441	0.325423	0.08832	0.419349	Rad54b	4	11558922	11615805	+	5782	protein_coding	RAD54 homolog B (S. cerevisiae) [Source:MGI Symbol;Acc:MGI:3605986] && sp|Q6PFE3|RA54B_MOUSE DNA repair and recombination protein RAD54B OS=Mus musculus OX=10090 GN=Rad54b PE=2 SV=1 && PF00176:SNF2 family N-terminal domain|PF00271:Helicase conserved C-terminal domain	-
ENSMUSG00000116946	90.5178	72.5061	55.2866	51.6184	63.2951	45.2307	72.7702	53.3814	0.444066	0.0885047	0.419683	AC130815.2	16	31233590	31248313	+	4634	lincRNA	novel transcript && - && -	-
ENSMUSG00000091558	3.19475	9.06327	8.34515	0	5.50392	1.10319	6.86772	2.20237	1.63991	0.0885266	0.419683	Gm17227	19	7297658	7304528	+	1016	antisense	predicted gene 17227 [Source:MGI Symbol;Acc:MGI:4938054] && - && -	-
ENSMUSG00000028331	168.257	168.174	151.256	137.085	145.854	110.319	162.562	131.086	0.307761	0.0885498	0.419683	Trmo	4	46376505	46389437	-	2271	protein_coding	tRNA methyltransferase O [Source:MGI Symbol;Acc:MGI:1922003] && sp|Q562D6|TRMO_MOUSE tRNA (adenine(37)-N6)-methyltransferase OS=Mus musculus OX=10090 GN=Trmo PE=2 SV=2 && PF01980:tRNA-methyltransferase O	-
ENSMUSG00000086368	10.6492	8.05624	7.302	5.92342	3.66928	3.30956	8.66913	4.30075	0.994784	0.0885637	0.419683	Gm13830	5	115301120	115319208	+	3099	lincRNA	predicted gene 13830 [Source:MGI Symbol;Acc:MGI:3651141] && - && -	-
ENSMUSG00000094103	91.5827	47.3304	88.6672	87.1589	77.0549	182.026	75.8601	115.413	-0.602853	0.0885782	1	1700047I17Rik2	12	55199592	55217168	+	3863	protein_coding	RIKEN cDNA 1700047I17 gene 2 [Source:MGI Symbol;Acc:MGI:3714351] && sp|Q8BR63|F177A_MOUSE Protein FAM177A1 OS=Mus musculus OX=10090 GN=Fam177a1 PE=1 SV=1 && PF14774:FAM177 family	-
ENSMUSG00000096968	9.58424	1.00703	6.25886	3.38481	0.91732	1.10319	5.61671	1.80177	1.61009	0.0885918	0.419683	Gm26620	1	170885065	170885881	+	817	protein_coding	predicted gene, 26620 [Source:MGI Symbol;Acc:MGI:5477114] && sp|Q9D0T2|DUS12_MOUSE Dual specificity protein phosphatase 12 OS=Mus musculus OX=10090 GN=Dusp12 PE=2 SV=1 && PF00782:Dual specificity phosphatase, catalytic domain	-
ENSMUSG00000087034	57.5054	67.471	59.4592	54.157	48.618	31.9925	61.4785	44.9225	0.445264	0.0887577	0.420181	Cbfa2t2-ps1	5	60231483	60232212	+	730	processed_pseudogene	core-binding factor, runt domain, alpha subunit 2; translocated to, (human), pseudogene 1 [Source:MGI Symbol;Acc:MGI:1333788] && sp|O70374|MTG8R_MOUSE Protein CBFA2T2 OS=Mus musculus OX=10090 GN=Cbfa2t2 PE=1 SV=3 && PF07531:NHR1 homology to TAF	-
ENSMUSG00000097523	20.2334	10.0703	5.21572	16.9241	25.685	19.8574	11.8398	20.8221	-0.816676	0.088826	1	1700022N22Rik	17	25985815	25988469	+	709	lincRNA	RIKEN cDNA 1700022N22 gene [Source:MGI Symbol;Acc:MGI:1916681] && - && -	-
ENSMUSG00000090544	9.58424	12.0844	15.6471	19.4627	19.2637	19.8574	12.4386	19.5279	-0.649521	0.0888963	0.420181	Gm6576	15	27025328	27026210	+	883	processed_pseudogene	predicted gene 6576 [Source:MGI Symbol;Acc:MGI:3646644] && sp|P25444|RS2_MOUSE 40S ribosomal protein S2 OS=Mus musculus OX=10090 GN=Rps2 PE=1 SV=3 && PF00333:Ribosomal protein S5, N-terminal domain|PF03719:Ribosomal protein S5, C-terminal domain	-
ENSMUSG00000097643	4.25966	10.0703	2.08629	5.07722	8.25588	25.3733	5.47208	12.9021	-1.21952	0.0889477	0.420181	A130051J06Rik	15	95787856	95791642	-	2618	antisense	RIKEN cDNA A130051J0 gene [Source:MGI Symbol;Acc:MGI:3642574] && - && -	-
ENSMUSG00000073145	7.45441	3.02109	0	0.846203	0	1.10319	3.49183	0.649797	2.447	0.0889958	0.420181	Gm12000	11	11695133	11696439	-	629	antisense	predicted gene 12000 [Source:MGI Symbol;Acc:MGI:3651524] && - && -	-
ENSMUSG00000038331	305.631	270.891	293.123	327.48	298.129	483.196	289.882	369.602	-0.349056	0.0890001	0.420181	Satb2	1	56793981	56978650	-	6788	protein_coding	special AT-rich sequence binding protein 2 [Source:MGI Symbol;Acc:MGI:2679336] && sp|Q8VI24|SATB2_MOUSE DNA-binding protein SATB2 OS=Mus musculus OX=10090 GN=Satb2 PE=1 SV=1 && -	-
ENSMUSG00000082029	29.8176	48.3374	22.9492	24.5399	26.6023	11.0319	33.7014	20.7247	0.69259	0.0890089	0.420181	H3f3c	2	119665626	119666036	-	411	processed_pseudogene	H3 histone, family 3C [Source:MGI Symbol;Acc:MGI:3650546] && sp|P02301|H3C_MOUSE Histone H3.3C OS=Mus musculus OX=10090 GN=H3-5 PE=3 SV=3 && PF00125:Core histone H2A/H2B/H3/H4	-
ENSMUSG00000020150	14.9088	16.1125	9.38829	23.6937	12.8425	30.8893	13.4699	22.4751	-0.731762	0.0890179	1	Gamt	10	80258151	80261012	-	1444	protein_coding	guanidinoacetate methyltransferase [Source:MGI Symbol;Acc:MGI:1098221] && sp|O35969|GAMT_MOUSE Guanidinoacetate N-methyltransferase OS=Mus musculus OX=10090 GN=Gamt PE=1 SV=1 && -	-
ENSMUSG00000080870	1.06492	2.01406	1.04314	3.38481	1.83464	7.72232	1.37404	4.31392	-1.62585	0.0890432	0.420181	Gm14111	2	146754707	146755705	-	999	processed_pseudogene	predicted gene 14111 [Source:MGI Symbol;Acc:MGI:3652258] && sp|P16858|G3P_MOUSE Glyceraldehyde-3-phosphate dehydrogenase OS=Mus musculus OX=10090 GN=Gapdh PE=1 SV=2 && PF02800:Glyceraldehyde 3-phosphate dehydrogenase, C-terminal domain	-
ENSMUSG00000034855	256.645	249.743	1398.86	285.17	190.803	540.562	635.081	338.845	0.90676	0.0890787	0.420181	Cxcl10	5	92346638	92348889	-	2252	protein_coding	chemokine (C-X-C motif) ligand 10 [Source:MGI Symbol;Acc:MGI:1352450] && sp|P17515|CXL10_MOUSE C-X-C motif chemokine 10 OS=Mus musculus OX=10090 GN=Cxcl10 PE=1 SV=1 && -	-
ENSMUSG00000083911	5.32458	6.04218	0	12.693	10.0905	5.51594	3.78892	9.43317	-1.32138	0.0890809	0.420181	Gm4342	8	123853829	123854195	+	367	processed_pseudogene	predicted gene 4342 [Source:MGI Symbol;Acc:MGI:3782526] && sp|Q6ZWV7|RL35_MOUSE 60S ribosomal protein L35 OS=Mus musculus OX=10090 GN=Rpl35 PE=1 SV=1 && -	-
ENSMUSG00000036356	7.45441	6.04218	8.34515	0.846203	1.83464	6.61913	7.28058	3.09999	1.2817	0.0891001	0.420181	Csgalnact1	8	68356781	68735146	-	5093	protein_coding	chondroitin sulfate N-acetylgalactosaminyltransferase 1 [Source:MGI Symbol;Acc:MGI:2442354] && sp|Q8BJQ9|CGAT1_MOUSE Chondroitin sulfate N-acetylgalactosaminyltransferase 1 OS=Mus musculus OX=10090 GN=Csgalnact1 PE=2 SV=1 && PF05679:Chondroitin N-acetylgalactosaminyltransferase	-
ENSMUSG00000065752	1.06492	0	0	1.69241	3.66928	1.10319	0.354972	2.15496	-2.54217	0.0891618	0.420282	Gm23344	9	64175048	64175115	+	68	snoRNA	predicted gene, 23344 [Source:MGI Symbol;Acc:MGI:5453121] && - && -	-
ENSMUSG00000060427	309.89	337.355	365.1	264.015	310.972	272.488	337.448	282.491	0.256444	0.0892443	1	Zfp868	8	69610857	69625548	-	2893	protein_coding	zinc finger protein 868 [Source:MGI Symbol;Acc:MGI:2142546] && sp|Q8IZC7|ZN101_HUMAN Zinc finger protein 101 OS=Homo sapiens OX=9606 GN=ZNF101 PE=1 SV=1 && PF01352:KRAB box|PF00096:Zinc finger, C2H2 type	-
ENSMUSG00000024210	4.25966	8.05624	6.25886	6.76962	10.0905	19.8574	6.19159	12.2392	-0.964684	0.0892471	1	Ip6k3	17	27143969	27167764	-	2307	protein_coding	inositol hexaphosphate kinase 3 [Source:MGI Symbol;Acc:MGI:3045325] && sp|Q8BWD2|IP6K3_MOUSE Inositol hexakisphosphate kinase 3 OS=Mus musculus OX=10090 GN=Ip6k3 PE=2 SV=1 && -	-
ENSMUSG00000097020	11.7141	8.05624	6.25886	16.9241	12.8425	14.3414	8.67639	14.7027	-0.764995	0.0893662	0.421056	Gm26613	11	115615462	115626707	+	1457	lincRNA	predicted gene, 26613 [Source:MGI Symbol;Acc:MGI:5477107] && sp|Q9DAM5|TPC_MOUSE Mitochondrial thiamine pyrophosphate carrier OS=Mus musculus OX=10090 GN=Slc25a19 PE=1 SV=1 && -	-
ENSMUSG00000067377	22.3632	23.1617	22.9492	15.2316	17.4291	1.10319	22.8247	11.2546	1.0033	0.0894491	1	Tspan6	X	133891068	133898429	-	2060	protein_coding	tetraspanin 6 [Source:MGI Symbol;Acc:MGI:1926264] && sp|O70401|TSN6_MOUSE Tetraspanin-6 OS=Mus musculus OX=10090 GN=Tspan6 PE=1 SV=1 && PF00335:Tetraspanin family	-
ENSMUSG00000112442	3.19475	1.00703	5.21572	0	1.83464	0	3.13916	0.611547	2.33312	0.0894491	1	Gm47992	10	78298315	78300301	+	1987	TEC	predicted gene, 47992 [Source:MGI Symbol;Acc:MGI:6097287] && - && -	-
ENSMUSG00000067038	2752.81	3173.15	3065.8	2728.16	2560.24	2529.61	2997.25	2606	0.201747	0.0895388	0.421561	Rps12-ps3	19	59322290	59322783	+	494	protein_coding	ribosomal protein S12, pseudogene 3 [Source:MGI Symbol;Acc:MGI:3704503] && sp|Q76I81|RS12_BOVIN 40S ribosomal protein S12 OS=Bos taurus OX=9913 GN=RPS12 PE=2 SV=1 && PF01248:Ribosomal protein L7Ae/L30e/S12e/Gadd45 family	-
novel.260	47.9212	49.3445	47.9846	58.388	49.5353	95.9774	48.4167	67.9669	-0.483274	0.0895543	0.421561	-	Y	42511956	42513147	-	1165	-	- && sp|P03975|IGEB_MOUSE IgE-binding protein OS=Mus musculus OX=10090 GN=Iap PE=2 SV=1 && PF00607:gag gene protein p24 (core nucleocapsid protein)	-
ENSMUSG00000040136	3.19475	0	0	5.07722	5.50392	2.20638	1.06492	4.2625	-2.025	0.0896176	1	Abcc8	7	46104523	46180033	-	8090	protein_coding	ATP-binding cassette, sub-family C (CFTR/MRP), member 8 [Source:MGI Symbol;Acc:MGI:1352629] && sp|Q09429|ABCC8_RAT ATP-binding cassette sub-family C member 8 OS=Rattus norvegicus OX=10116 GN=Abcc8 PE=1 SV=4 && PF00664:ABC transporter transmembrane region|PF00005:ABC transporter	-
ENSMUSG00000079625	133.114	112.787	159.601	129.469	115.582	400.457	135.168	215.17	-0.668731	0.0897753	0.422147	Tm4sf19	16	32400506	32408227	+	1257	protein_coding	transmembrane 4 L six family member 19 [Source:MGI Symbol;Acc:MGI:3645933] && sp|Q96DZ7|T4S19_HUMAN Transmembrane 4 L6 family member 19 OS=Homo sapiens OX=9606 GN=TM4SF19 PE=1 SV=2 && PF05805:L6 membrane protein	-
ENSMUSG00000026405	0	0	0	4.23101	2.75196	0	0	2.32766	-3.61727	0.0897876	0.422147	C4bp	1	130634773	130661632	-	6730	protein_coding	complement component 4 binding protein [Source:MGI Symbol;Acc:MGI:88229] && sp|P11369|LORF2_MOUSE LINE-1 retrotransposable element ORF2 protein OS=Mus musculus OX=10090 GN=Pol PE=1 SV=2 && -	-
ENSMUSG00000115300	0	0	0	4.23101	2.75196	0	0	2.32766	-3.61727	0.0898307	0.422147	Gm49188	15	34481707	34483829	+	2123	TEC	predicted gene, 49188 [Source:MGI Symbol;Acc:MGI:6118627] && - && -	-
ENSMUSG00000085962	2.12983	2.01406	1.04314	8.46203	5.50392	1.10319	1.72901	5.02305	-1.55845	0.089865	0.422147	Gm16984	13	34963982	34990452	+	1018	antisense	predicted gene, 16984 [Source:MGI Symbol;Acc:MGI:4439908] && sp|Q9WUR2|ECI2_MOUSE Enoyl-CoA delta isomerase 2 OS=Mus musculus OX=10090 GN=Eci2 PE=1 SV=2 && -	-
ENSMUSG00000109218	0	0	0	1.69241	5.50392	0	0	2.39878	-3.65718	0.0898814	0.422147	Gm44872	7	30085468	30085887	+	420	processed_pseudogene	predicted gene 44872 [Source:MGI Symbol;Acc:MGI:5753448] && sp|Q62084|PP14B_MOUSE Protein phosphatase 1 regulatory subunit 14B OS=Mus musculus OX=10090 GN=Ppp1r14b PE=1 SV=2 && -	-
ENSMUSG00000045662	1.06492	3.02109	0	4.23101	5.50392	3.30956	1.362	4.34817	-1.66805	0.0899965	0.422355	Henmt1	3	108939873	108960774	+	2675	protein_coding	HEN1 methyltransferase homolog 1 (Arabidopsis) [Source:MGI Symbol;Acc:MGI:1913965] && sp|Q8CAE2|HENMT_MOUSE Small RNA 2'-O-methyltransferase OS=Mus musculus OX=10090 GN=Henmt1 PE=1 SV=1 && PF13489:Methyltransferase domain	-
ENSMUSG00000027018	1239.56	1277.92	1312.27	1172.84	1136.56	1000.59	1276.59	1103.33	0.209968	0.0900067	0.422355	Hat1	2	71388958	71441622	+	2886	protein_coding	histone aminotransferase 1 [Source:MGI Symbol;Acc:MGI:96013] && sp|Q8BY71|HAT1_MOUSE Histone acetyltransferase type B catalytic subunit OS=Mus musculus OX=10090 GN=Hat1 PE=1 SV=1 && PF10394:Histone acetyl transferase HAT1 N-terminus	-
ENSMUSG00000082044	76.6739	67.471	79.2789	91.3899	110.996	82.7391	74.4746	95.0416	-0.354152	0.0900965	0.422515	Snrpert	2	131322088	131322366	-	279	processed_pseudogene	small nuclear ribonucleoprotein E, pseudogene [Source:MGI Symbol;Acc:MGI:3650419] && sp|A4FUI2|RUXE_BOVIN Small nuclear ribonucleoprotein E OS=Bos taurus OX=9913 GN=SNRPE PE=3 SV=1 && -	-
ENSMUSG00000097904	21.2983	18.1265	7.302	22.0013	29.3543	24.2701	15.5756	25.2086	-0.69465	0.0901416	0.422515	Gm26711	5	110385835	110388073	+	1833	lincRNA	predicted gene, 26711 [Source:MGI Symbol;Acc:MGI:5477205] && - && -	-
ENSMUSG00000053472	0	0	0	0	1.83464	5.51594	0	2.45019	-3.6704	0.0901625	0.422515	Gm13534	2	58108060	58108572	+	513	processed_pseudogene	predicted gene 13534 [Source:MGI Symbol;Acc:MGI:3651249] && sp|Q8BG93|NUD15_MOUSE Nucleotide triphosphate diphosphatase NUDT15 OS=Mus musculus OX=10090 GN=Nudt15 PE=1 SV=1 && PF00293:NUDIX domain	-
ENSMUSG00000115992	0	0	0	0	1.83464	5.51594	0	2.45019	-3.6704	0.0902183	0.422587	Gm10832	16	11031956	11036420	+	701	lincRNA	predicted gene 10832 [Source:MGI Symbol;Acc:MGI:3642210] && - && -	-
ENSMUSG00000113315	1.06492	1.00703	0	1.69241	6.42124	1.10319	0.690648	3.07228	-2.16038	0.09029	0.422604	Gm8227	13	74381629	74382199	-	571	processed_pseudogene	predicted gene 8227 [Source:MGI Symbol;Acc:MGI:3648589] && sp|P59017|B2L13_MOUSE Bcl-2-like protein 13 OS=Mus musculus OX=10090 GN=Bcl2l13 PE=1 SV=2 && -	-
ENSMUSG00000020459	487.731	500.494	557.038	539.877	604.514	708.247	515.088	617.546	-0.260813	0.0903031	0.422604	Mtif2	11	29526408	29545279	+	3868	protein_coding	mitochondrial translational initiation factor 2 [Source:MGI Symbol;Acc:MGI:1924034] && sp|Q91YJ5|IF2M_MOUSE Translation initiation factor IF-2, mitochondrial OS=Mus musculus OX=10090 GN=Mtif2 PE=1 SV=2 && PF11987:Translation-initiation factor 2|PF00009:Elongation factor Tu GTP binding domain	-
ENSMUSG00000086866	14.9088	12.0844	38.5963	11.8468	5.50392	17.651	21.8632	11.6673	0.915022	0.0904351	0.423031	4930512H18Rik	8	61849006	61922834	+	1611	antisense	RIKEN cDNA 4930512H18 gene [Source:MGI Symbol;Acc:MGI:1922361] && - && -	-
ENSMUSG00000052396	30.8825	28.1968	69.8906	27.9247	22.933	31.9925	42.99	27.6167	0.6406	0.0904559	1	Mogat2	7	99219084	99238619	-	1835	protein_coding	monoacylglycerol O-acyltransferase 2 [Source:MGI Symbol;Acc:MGI:2663253] && sp|Q80W94|MOGT2_MOUSE 2-acylglycerol O-acyltransferase 2 OS=Mus musculus OX=10090 GN=Mogat2 PE=1 SV=1 && PF03982:Diacylglycerol acyltransferase	-
ENSMUSG00000027253	84.1283	76.5342	90.7535	80.3893	93.5667	186.439	83.8053	120.132	-0.515429	0.090506	0.423078	Lrp4	2	91457511	91513779	+	10504	protein_coding	low density lipoprotein receptor-related protein 4 [Source:MGI Symbol;Acc:MGI:2442252] && sp|Q8VI56|LRP4_MOUSE Low-density lipoprotein receptor-related protein 4 OS=Mus musculus OX=10090 GN=Lrp4 PE=1 SV=3 && PF00058:Low-density lipoprotein receptor repeat class B|PF00057:Low-density lipoprotein receptor domain class A|PF14670:Coagulation Factor Xa inhibitory site|PF12662:Complement Clr-like EGF-l…	-
ENSMUSG00000007682	0	0	3.12943	1.69241	1.83464	11.0319	1.04314	4.85298	-2.20512	0.0905262	0.423078	Dio2	12	90724552	90738438	-	5815	protein_coding	deiodinase, iodothyronine, type II [Source:MGI Symbol;Acc:MGI:1338833] && sp|Q9Z1Y9|IOD2_MOUSE Type II iodothyronine deiodinase OS=Mus musculus OX=10090 GN=Dio2 PE=1 SV=4 && PF00837:Iodothyronine deiodinase	-
ENSMUSG00000114696	1.06492	6.04218	0	0	0	0	2.36903	0	3.76394	0.0906234	0.423223	Gm47479	13	114118441	114120416	-	1976	TEC	predicted gene, 47479 [Source:MGI Symbol;Acc:MGI:6096452] && - && -	-
ENSMUSG00000035095	1.06492	0	0	3.38481	1.83464	1.10319	0.354972	2.10755	-2.51632	0.0906383	0.423223	Fam167a	14	63436394	63465498	+	4274	protein_coding	family with sequence similarity 167, member A [Source:MGI Symbol;Acc:MGI:3606565] && sp|Q6P1G6|F167A_MOUSE Protein FAM167A OS=Mus musculus OX=10090 GN=Fam167a PE=2 SV=1 && PF11652:FAM167	-
ENSMUSG00000062380	35.1422	32.2249	46.9414	74.4658	38.5275	50.7467	38.1029	54.58	-0.521728	0.0908127	0.423424	Tubb3	8	123411424	123422015	+	1868	protein_coding	tubulin, beta 3 class III [Source:MGI Symbol;Acc:MGI:107813] && sp|Q9ERD7|TBB3_MOUSE Tubulin beta-3 chain OS=Mus musculus OX=10090 GN=Tubb3 PE=1 SV=1 && PF00091:Tubulin/FtsZ family, GTPase domain|PF03953:Tubulin C-terminal domain	-
ENSMUSG00000067365	750.765	758.293	705.165	656.653	667.809	583.587	738.074	636.016	0.214094	0.0908184	0.423424	Tmem128	5	38260185	38269634	+	3629	protein_coding	transmembrane protein 128 [Source:MGI Symbol;Acc:MGI:1913559] && sp|Q9CZB9|TM128_MOUSE Transmembrane protein 128 OS=Mus musculus OX=10090 GN=Tmem128 PE=1 SV=2 && -	-
ENSMUSG00000035200	2.12983	1.00703	5.21572	1.69241	5.50392	16.5478	2.78419	7.91472	-1.49234	0.0908688	0.423424	Chrnb4	9	55028154	55048779	-	3723	protein_coding	cholinergic receptor, nicotinic, beta polypeptide 4 [Source:MGI Symbol;Acc:MGI:87892] && sp|Q8R493|ACHB4_MOUSE Neuronal acetylcholine receptor subunit beta-4 OS=Mus musculus OX=10090 GN=Chrnb4 PE=2 SV=1 && PF02932:Neurotransmitter-gated ion-channel transmembrane region|PF02931:Neurotransmitter-gated ion-channel ligand binding domain	-
ENSMUSG00000115961	8.51932	7.04921	7.302	3.38481	4.5866	3.30956	7.62351	3.76033	1.01558	0.0908747	0.423424	Gm41409	16	3770454	3785729	+	1072	lincRNA	predicted gene, 41409 [Source:MGI Symbol;Acc:MGI:5624294] && - && -	-
ENSMUSG00000097194	27.6878	16.1125	31.2943	30.4633	33.9409	47.4371	25.0315	37.2804	-0.570778	0.0908845	0.423424	9330175E14Rik	8	94422898	94435103	-	5938	lincRNA	RIKEN cDNA 9330175E14 gene [Source:MGI Symbol;Acc:MGI:2443913] && - && -	-
ENSMUSG00000077714	10.6492	1.00703	7.302	9.30823	12.8425	17.651	6.3194	13.2672	-1.06984	0.0909604	1	Snord17	2	144265979	144266216	-	238	snoRNA	small nucleolar RNA, C/D box 17 [Source:MGI Symbol;Acc:MGI:3819523] && - && -	-
ENSMUSG00000084744	1.06492	2.01406	5.21572	5.07722	1.83464	16.5478	2.7649	7.81989	-1.48323	0.0910524	0.423853	Gm25291	11	51737779	51737922	-	144	snoRNA	predicted gene, 25291 [Source:MGI Symbol;Acc:MGI:5455068] && - && -	-
ENSMUSG00000089714	0	1.00703	0	3.38481	1.83464	1.10319	0.335677	2.10755	-2.51627	0.0910692	0.423853	Gm16092	1	85511133	85527161	-	2405	lincRNA	predicted gene 16092 [Source:MGI Symbol;Acc:MGI:3841241] && sp|Q13342|SP140_HUMAN Nuclear body protein SP140 OS=Homo sapiens OX=9606 GN=SP140 PE=1 SV=2 && -	-
ENSMUSG00000093885	13.8439	7.04921	20.8629	5.07722	4.5866	12.1351	13.9187	7.2663	0.957532	0.0910988	0.423853	Rpl35a-ps5	5	33076038	33076370	+	333	processed_pseudogene	ribosomal protein L35A, pseudogene 5 [Source:MGI Symbol;Acc:MGI:3704247] && sp|O55142|RL35A_MOUSE 60S ribosomal protein L35a OS=Mus musculus OX=10090 GN=Rpl35a PE=1 SV=2 && PF01247:Ribosomal protein L35Ae	-
ENSMUSG00000021270	13748.1	14523.4	20609.4	13069.6	13176.4	13601.2	16293.6	13282.4	0.294794	0.0912772	1	Hsp90aa1	12	110690605	110702728	-	3931	protein_coding	heat shock protein 90, alpha (cytosolic), class A member 1 [Source:MGI Symbol;Acc:MGI:96250] && sp|P07901|HS90A_MOUSE Heat shock protein HSP 90-alpha OS=Mus musculus OX=10090 GN=Hsp90aa1 PE=1 SV=4 && PF02518:Histidine kinase-, DNA gyrase B-, and HSP90-like ATPase|PF00183:Hsp90 protein	-
ENSMUSG00000026809	5.32458	5.03515	9.38829	8.46203	10.0905	18.7542	6.58267	12.4356	-0.905092	0.0913099	0.424529	Spaca9	2	28692080	28699727	-	747	protein_coding	sperm acrosome associated 9 [Source:MGI Symbol;Acc:MGI:1917237] && sp|Q7TPM5|SACA9_MOUSE Sperm acrosome-associated protein 9 OS=Mus musculus OX=10090 GN=Spaca9 PE=1 SV=1 && PF15120:Sperm acrosome-associated protein 9	-
ENSMUSG00000060093	4.25966	7.04921	1.04314	8.46203	9.1732	8.82551	4.11734	8.82025	-1.09405	0.0913255	0.424529	Hist1h4a	13	23760692	23761230	-	539	protein_coding	histone cluster 1, H4a [Source:MGI Symbol;Acc:MGI:2448419] && sp|P62803|H4_BOVIN Histone H4 OS=Bos taurus OX=9913 PE=1 SV=2 && PF15511:Centromere kinetochore component CENP-T histone fold	-
ENSMUSG00000039205	1072.37	1039.25	1253.86	1306.54	1230.13	1409.87	1121.83	1315.51	-0.229596	0.0914125	0.424653	Ciz1	2	32352327	32380970	+	8604	protein_coding	CDKN1A interacting zinc finger protein 1 [Source:MGI Symbol;Acc:MGI:1920234] && sp|Q9ULV3|CIZ1_HUMAN Cip1-interacting zinc finger protein OS=Homo sapiens OX=9606 GN=CIZ1 PE=1 SV=2 && -	-
ENSMUSG00000028137	29.8176	39.2742	38.5963	59.2342	57.7912	34.1988	35.896	50.4081	-0.495284	0.0914682	0.424653	Celf3	3	94478295	94492198	+	5473	protein_coding	CUGBP, Elav-like family member 3 [Source:MGI Symbol;Acc:MGI:1926034] && sp|Q8CIN6|CELF3_MOUSE CUGBP Elav-like family member 3 OS=Mus musculus OX=10090 GN=Celf3 PE=2 SV=1 && -	-
ENSMUSG00000047996	85.1932	84.5905	104.314	85.4665	62.3778	62.8817	91.366	70.242	0.375629	0.0915069	0.424653	Prrg1	X	78449613	78583896	-	11614	protein_coding	proline rich Gla (G-carboxyglutamic acid) 1 [Source:MGI Symbol;Acc:MGI:1917364] && sp|A7Z070|TMG1_BOVIN Transmembrane gamma-carboxyglutamic acid protein 1 OS=Bos taurus OX=9913 GN=PRRG1 PE=2 SV=1 && PF00594:Vitamin K-dependent carboxylation/gamma-carboxyglutamic (GLA) domain	-
ENSMUSG00000084966	5.32458	0	2.08629	9.30823	10.0905	2.20638	2.47029	7.20171	-1.56308	0.0915152	0.424653	2810471M01Rik	11	28681564	28693276	+	1597	lincRNA	RIKEN cDNA 2810471M01 gene [Source:MGI Symbol;Acc:MGI:1920068] && - && -	-
ENSMUSG00000020333	2.12983	3.02109	3.12943	6.76962	7.33856	4.41275	2.76012	6.17365	-1.16811	0.0915737	1	Acsl6	11	54303798	54364756	+	9914	protein_coding	acyl-CoA synthetase long-chain family member 6 [Source:MGI Symbol;Acc:MGI:894291] && sp|Q91WC3|ACSL6_MOUSE Long-chain-fatty-acid--CoA ligase 6 OS=Mus musculus OX=10090 GN=Acsl6 PE=1 SV=1 && PF00501:AMP-binding enzyme	-
ENSMUSG00000018341	5.32458	9.06327	13.5609	5.07722	5.50392	3.30956	9.31624	4.63023	0.997984	0.0916261	1	Il12rb2	6	67291318	67376188	-	3794	protein_coding	interleukin 12 receptor, beta 2 [Source:MGI Symbol;Acc:MGI:1270861] && sp|P97378|I12R2_MOUSE Interleukin-12 receptor subunit beta-2 OS=Mus musculus OX=10090 GN=Il12rb2 PE=1 SV=1 && PF00041:Fibronectin type III domain|PF06328:Ig-like C2-type domain	-
ENSMUSG00000082423	1.06492	0	0	3.38481	4.5866	0	0.354972	2.65714	-2.84919	0.0916862	1	Gm15148	X	151493114	151493269	-	156	processed_pseudogene	predicted gene 15148 [Source:MGI Symbol;Acc:MGI:3705350] && sp|Q3T051|RL39_BOVIN 60S ribosomal protein L39 OS=Bos taurus OX=9913 GN=RPL39 PE=3 SV=3 && -	-
ENSMUSG00000089281	4.25966	1.00703	1.04314	0	0.91732	0	2.10328	0.305773	2.62424	0.0917033	1	Scarna6	1	87784556	87784820	+	265	scaRNA	small Cajal body-specific RNA 6 [Source:MGI Symbol;Acc:MGI:3819487] && - && -	-
ENSMUSG00000037465	363.136	344.404	309.814	315.634	284.369	240.495	339.118	280.166	0.273739	0.0917033	1	Klf10	15	38291463	38300706	-	4179	protein_coding	Kruppel-like factor 10 [Source:MGI Symbol;Acc:MGI:1101353] && sp|O89091|KLF10_MOUSE Krueppel-like factor 10 OS=Mus musculus OX=10090 GN=Klf10 PE=1 SV=1 && -	-
ENSMUSG00000030621	22.3632	19.1336	18.7766	41.4639	40.3621	14.3414	20.0911	32.0558	-0.683322	0.0917173	0.425162	Me3	7	89632392	89854359	+	14624	protein_coding	malic enzyme 3, NADP(+)-dependent, mitochondrial [Source:MGI Symbol;Acc:MGI:1916679] && sp|Q8BMF3|MAON_MOUSE NADP-dependent malic enzyme, mitochondrial OS=Mus musculus OX=10090 GN=Me3 PE=1 SV=2 && PF00390:Malic enzyme, N-terminal domain|PF03949:Malic enzyme, NAD binding domain	-
ENSMUSG00000097032	3.19475	3.02109	2.08629	6.76962	7.33856	4.41275	2.76737	6.17365	-1.16626	0.0917429	1	4930539J05Rik	3	135436209	135438665	-	1668	antisense	RIKEN cDNA 4930539J05 gene [Source:MGI Symbol;Acc:MGI:1922477] && - && -	-
ENSMUSG00000078127	1.06492	0	7.302	0	0	1.10319	2.78897	0.367729	3.03406	0.0917567	1	Fam170b	14	32833962	32836789	+	2692	protein_coding	family with sequence similarity 170, member B [Source:MGI Symbol;Acc:MGI:2145650] && sp|E9PXT9|F170B_MOUSE Protein FAM170B OS=Mus musculus OX=10090 GN=Fam170b PE=1 SV=1 && PF17734:Spermatogenesis-associated protein 46	-
ENSMUSG00000067121	20.2334	16.1125	20.8629	27.0785	39.4448	19.8574	19.0696	28.7935	-0.600946	0.091854	0.425162	Gm7027	7	101573460	101574321	-	862	processed_pseudogene	predicted gene 7027 [Source:MGI Symbol;Acc:MGI:3644555] && sp|P47911|RL6_MOUSE 60S ribosomal protein L6 OS=Mus musculus OX=10090 GN=Rpl6 PE=1 SV=3 && -	-
ENSMUSG00000002980	73.4792	95.6678	133.522	75.312	84.3935	65.0881	100.89	74.9312	0.427562	0.0918565	0.425162	Bcam	7	19756131	19771016	-	3199	protein_coding	basal cell adhesion molecule [Source:MGI Symbol;Acc:MGI:1929940] && sp|Q9R069|BCAM_MOUSE Basal cell adhesion molecule OS=Mus musculus OX=10090 GN=Bcam PE=1 SV=1 && -	-
ENSMUSG00000039958	100.102	102.717	70.9337	83.7741	68.799	49.6435	91.2509	67.4055	0.431841	0.0919334	0.425162	Etfbkmt	6	149139849	149151171	+	2496	protein_coding	electron transfer flavoprotein beta subunit lysine methyltransferase [Source:MGI Symbol;Acc:MGI:2443575] && sp|Q80ZM3|ETKMT_MOUSE Electron transfer flavoprotein beta subunit lysine methyltransferase OS=Mus musculus OX=10090 GN=Mettl20 PE=1 SV=1 && PF06325:Ribosomal protein L11 methyltransferase (PrmA)	-
ENSMUSG00000048544	1.06492	0	0	4.23101	3.66928	0	0.354972	2.63343	-2.83782	0.0919386	0.425162	5930422O12Rik	8	33428709	33429548	+	840	protein_coding	RIKEN cDNA 5930422O12 gene [Source:MGI Symbol;Acc:MGI:2442538] && - && -	-
ENSMUSG00000027599	780.583	712.977	755.236	676.116	653.132	625.508	749.599	651.585	0.201683	0.0919631	0.425162	Armc1	3	19131402	19163065	-	3673	protein_coding	armadillo repeat containing 1 [Source:MGI Symbol;Acc:MGI:1921502] && sp|Q9D7A8|ARMC1_MOUSE Armadillo repeat-containing protein 1 OS=Mus musculus OX=10090 GN=Armc1 PE=1 SV=1 && -	-
ENSMUSG00000078620	0	1.00703	7.302	0	0	1.10319	2.76968	0.367729	3.02511	0.0919656	0.425162	Gm10964	3	103739366	103746376	+	120	protein_coding	predicted gene 10964 [Source:MGI Symbol;Acc:MGI:3779175] && - && -	-
ENSMUSG00000076038	1.06492	1.00703	4.17257	0	0.91732	0	2.08151	0.305773	2.61232	0.0920229	1	Gm22774	17	6131836	6131944	-	109	miRNA	predicted gene, 22774 [Source:MGI Symbol;Acc:MGI:5452551] && sp|P29391|FRIL1_MOUSE Ferritin light chain 1 OS=Mus musculus OX=10090 GN=Ftl1 PE=1 SV=2 && -	-
ENSMUSG00000100397	1.06492	0	0	2.53861	5.50392	0	0.354972	2.68084	-2.86024	0.0922448	0.425162	Gm28071	1	79957580	79958057	+	478	processed_pseudogene	predicted gene 28071 [Source:MGI Symbol;Acc:MGI:5578777] && sp|Q99K95|RTF2_MOUSE Replication termination factor 2 OS=Mus musculus OX=10090 GN=Rtf2 PE=1 SV=1 && -	-
ENSMUSG00000022383	4.25966	6.04218	6.25886	9.30823	20.181	4.41275	5.52023	11.3007	-1.04138	0.0922485	0.425162	Ppara	15	85734983	85802819	+	3836	protein_coding	peroxisome proliferator activated receptor alpha [Source:MGI Symbol;Acc:MGI:104740] && sp|P23204|PPARA_MOUSE Peroxisome proliferator-activated receptor alpha OS=Mus musculus OX=10090 GN=Ppara PE=1 SV=2 && -	-
ENSMUSG00000082848	0	0	2.08629	2.53861	4.5866	2.20638	0.695429	3.11053	-2.16872	0.0922605	0.425162	Gm16066	19	3798615	3852419	-	1086	processed_transcript	predicted gene 16066 [Source:MGI Symbol;Acc:MGI:3801953] && sp|O54804|CHKA_MOUSE Choline kinase alpha OS=Mus musculus OX=10090 GN=Chka PE=1 SV=3 && -	-
ENSMUSG00000104346	4.25966	7.04921	0	1.69241	0	0	3.76962	0.564135	2.67673	0.0923115	0.425162	Pcdhga3	18	37674307	37841873	+	4720	protein_coding	protocadherin gamma subfamily A, 3 [Source:MGI Symbol;Acc:MGI:1935215] && sp|Q9Y5H0|PCDG3_HUMAN Protocadherin gamma-A3 OS=Homo sapiens OX=9606 GN=PCDHGA3 PE=2 SV=2 && -	-
ENSMUSG00000048442	11.7141	6.04218	9.38829	5.92342	5.50392	1.10319	9.04818	4.17684	1.08327	0.092333	0.425162	Smim5	11	115899966	115906269	+	1649	protein_coding	small integral membrane protein 5 [Source:MGI Symbol;Acc:MGI:1913778] && sp|Q8BT42|SMIM5_MOUSE Small integral membrane protein 5 OS=Mus musculus OX=10090 GN=Smim5 PE=4 SV=1 && -	-
ENSMUSG00000039081	111.816	73.5132	85.5377	103.237	106.409	146.724	90.289	118.79	-0.393636	0.09235	0.425162	Zfp503	14	21983959	21989601	-	4216	protein_coding	zinc finger protein 503 [Source:MGI Symbol;Acc:MGI:1353644] && sp|Q7TMA2|ZN503_MOUSE Zinc finger protein 503 OS=Mus musculus OX=10090 GN=Znf503 PE=1 SV=1 && -	-
ENSMUSG00000024526	0	0	0	0	3.66928	3.30956	0	2.32628	-3.60087	0.092351	0.425162	Cidea	18	67343564	67367794	+	1164	protein_coding	cell death-inducing DNA fragmentation factor, alpha subunit-like effector A [Source:MGI Symbol;Acc:MGI:1270845] && sp|O70302|CIDEA_MOUSE Cell death activator CIDE-A OS=Mus musculus OX=10090 GN=Cidea PE=1 SV=2 && PF02017:CIDE-N domain	-
ENSMUSG00000096929	40.4668	43.3023	37.5532	33.0019	28.4369	27.5797	40.4407	29.6728	0.443463	0.0923889	0.425162	A330023F24Rik	1	194976375	195037904	+	9354	processed_transcript	RIKEN cDNA A330023F24 gene [Source:MGI Symbol;Acc:MGI:2443958] && - && -	-
ENSMUSG00000087063	4.25966	0	7.302	6.76962	6.42124	16.5478	3.85389	9.9129	-1.35895	0.092392	1	Gm15857	5	123293638	123310324	-	789	antisense	predicted gene 15857 [Source:MGI Symbol;Acc:MGI:3801821] && - && -	-
ENSMUSG00000006457	6.38949	18.1265	10.4314	0	7.33856	6.61913	11.6492	4.65256	1.34308	0.0924405	1	Actn3	19	4861223	4877909	-	2894	protein_coding	actinin alpha 3 [Source:MGI Symbol;Acc:MGI:99678] && sp|O88990|ACTN3_MOUSE Alpha-actinin-3 OS=Mus musculus OX=10090 GN=Actn3 PE=2 SV=1 && PF00435:Spectrin repeat|PF08726:Ca2+ insensitive EF hand|PF00307:Calponin homology (CH) domain	-
ENSMUSG00000062157	149.088	89.6256	54.2434	82.9279	69.7163	36.4052	97.6524	63.0165	0.627464	0.0924454	0.425162	Ifnlr1	4	135686287	135708181	+	4182	protein_coding	interferon lambda receptor 1 [Source:MGI Symbol;Acc:MGI:2429859] && sp|Q8CGK5|INLR1_MOUSE Interferon lambda receptor 1 OS=Mus musculus OX=10090 GN=Ifnlr1 PE=2 SV=1 && PF01108:Tissue factor	-
ENSMUSG00000045875	0	0	0	0	0	12.1351	0	4.04502	-4.39842	0.0924576	1	Adra1a	14	66635251	66771168	+	8728	protein_coding	adrenergic receptor, alpha 1a [Source:MGI Symbol;Acc:MGI:104773] && sp|P97718|ADA1A_MOUSE Alpha-1A adrenergic receptor OS=Mus musculus OX=10090 GN=Adra1a PE=1 SV=3 && PF00001:7 transmembrane receptor (rhodopsin family)	-
ENSMUSG00000070501	7.45441	9.06327	46.9414	5.07722	3.66928	18.7542	21.153	9.1669	1.22244	0.0924739	0.425162	Ifi214	1	173519717	173535957	-	8107	protein_coding	interferon activated gene 214 [Source:MGI Symbol;Acc:MGI:3584522] && - && -	-
ENSMUSG00000033107	4.25966	2.01406	9.38829	3.38481	0.91732	1.10319	5.22067	1.80177	1.5044	0.0925152	0.425162	Rnf125	18	20944625	20983848	+	1334	protein_coding	ring finger protein 125 [Source:MGI Symbol;Acc:MGI:1914914] && sp|Q9D9R0|RN125_MOUSE E3 ubiquitin-protein ligase RNF125 OS=Mus musculus OX=10090 GN=Rnf125 PE=2 SV=3 && PF18574:C2HC Zing finger domain|PF05605:Drought induced 19 protein (Di19), zinc-binding	-
ENSMUSG00000090994	0	0	0	0.846203	1.83464	2.20638	0	1.62907	-3.08494	0.0925213	0.425162	Gm6153	1	87543635	87544692	-	1058	processed_pseudogene	predicted gene 6153 [Source:MGI Symbol;Acc:MGI:3645798] && sp|P51991|ROA3_HUMAN Heterogeneous nuclear ribonucleoprotein A3 OS=Homo sapiens OX=9606 GN=HNRNPA3 PE=1 SV=2 && -	-
ENSMUSG00000084213	0	0	0	0.846203	1.83464	2.20638	0	1.62907	-3.08494	0.0925903	1	Hspe1-ps5	2	72955898	72956194	+	297	processed_pseudogene	heat shock protein 1 (chaperonin 10), pseudogene 5 [Source:MGI Symbol;Acc:MGI:1935166] && sp|Q64433|CH10_MOUSE 10 kDa heat shock protein, mitochondrial OS=Mus musculus OX=10090 GN=Hspe1 PE=1 SV=2 && -	-
ENSMUSG00000087476	0	0	0	0.846203	1.83464	2.20638	0	1.62907	-3.08494	0.0925986	0.425162	Rap1gapos	4	137696979	137706606	-	471	antisense	RAP1 GTPase activating protein, opposite strand [Source:MGI Symbol;Acc:MGI:1917058] && - && -	-
ENSMUSG00000046080	0	0	0	0.846203	1.83464	2.20638	0	1.62907	-3.08494	0.0926512	0.425162	Clec9a	6	129408862	129424763	+	3293	protein_coding	C-type lectin domain family 9, member a [Source:MGI Symbol;Acc:MGI:2444608] && sp|Q8BRU4|CLC9A_MOUSE C-type lectin domain family 9 member A OS=Mus musculus OX=10090 GN=Clec9a PE=1 SV=1 && PF00059:Lectin C-type domain	-
ENSMUSG00000088393	0	0	0	0.846203	1.83464	2.20638	0	1.62907	-3.08494	0.0926575	0.425162	Gm26308	10	128377831	128377899	-	69	miRNA	predicted gene, 26308 [Source:MGI Symbol;Acc:MGI:5456085] && - && -	-
ENSMUSG00000113571	0	1.00703	2.08629	2.53861	0.91732	8.82551	1.03111	4.09381	-1.96501	0.092691	0.425162	Gm48137	12	35140892	35143130	+	2239	TEC	predicted gene, 48137 [Source:MGI Symbol;Acc:MGI:6097500] && - && -	-
ENSMUSG00000097230	5.32458	2.01406	4.17257	5.07722	9.1732	9.92869	3.83707	8.0597	-1.06695	0.0926999	0.425162	Gm26853	8	19789798	19798548	+	4010	lincRNA	predicted gene, 26853 [Source:MGI Symbol;Acc:MGI:5477347] && - && -	-
ENSMUSG00000029373	0	1.00703	7.302	0.846203	0	0	2.76968	0.282068	3.02511	0.0927061	0.425162	Pf4	5	90772435	90773383	+	721	protein_coding	platelet factor 4 [Source:MGI Symbol;Acc:MGI:1888711] && sp|Q9Z126|PLF4_MOUSE Platelet factor 4 OS=Mus musculus OX=10090 GN=Pf4 PE=1 SV=1 && PF00048:Small cytokines (intecrine/chemokine), interleukin-8 like	-
ENSMUSG00000106927	5.32458	5.03515	10.4314	12.693	11.0078	13.2383	6.93039	12.313	-0.828618	0.0927224	1	Gm43598	5	150597062	150599540	-	2479	lincRNA	predicted gene 43598 [Source:MGI Symbol;Acc:MGI:5663735] && - && -	-
ENSMUSG00000024033	9.58424	4.02812	23.9923	14.3854	15.5944	46.3339	12.5349	25.4379	-1.01502	0.0927436	0.425162	Rsph1	17	31255019	31277356	-	1164	protein_coding	radial spoke head 1 homolog (Chlamydomonas) [Source:MGI Symbol;Acc:MGI:1194909] && sp|Q8VIG3|RSPH1_MOUSE Radial spoke head 1 homolog OS=Mus musculus OX=10090 GN=Rsph1 PE=1 SV=2 && PF02493:MORN repeat	-
ENSMUSG00000031949	205.529	165.153	174.205	214.935	211.901	229.463	181.629	218.767	-0.268194	0.0927532	0.425162	Adat1	8	111966908	111992302	-	4399	protein_coding	adenosine deaminase, tRNA-specific 1 [Source:MGI Symbol;Acc:MGI:1353631] && sp|Q9JHI2|ADAT1_MOUSE tRNA-specific adenosine deaminase 1 OS=Mus musculus OX=10090 GN=Adat1 PE=1 SV=1 && PF02137:Adenosine-deaminase (editase) domain	-
ENSMUSG00000097216	18.1036	8.05624	19.8197	7.61582	10.0905	8.82551	15.3265	8.84395	0.792586	0.0927671	0.425162	4932441J04Rik	5	57570082	57720201	-	4716	processed_transcript	RIKEN cDNA 4932441J04 gene [Source:MGI Symbol;Acc:MGI:2441691] && sp|O60245|PCDH7_HUMAN Protocadherin-7 OS=Homo sapiens OX=9606 GN=PCDH7 PE=1 SV=2 && PF08266:Cadherin-like|PF00028:Cadherin domain	-
novel.202	2.12983	1.00703	33.3806	1.69241	0	7.72232	12.1725	3.13824	1.9792	0.0928328	1	-	6	41197300	41202108	-	620	-	- && - && -	-
ENSMUSG00000104149	3.19475	1.00703	3.12943	0.846203	2.75196	19.8574	2.44374	7.81852	-1.66282	0.0929388	1	Gm37138	1	15556249	15558337	+	2089	TEC	predicted gene, 37138 [Source:MGI Symbol;Acc:MGI:5610366] && - && -	-
ENSMUSG00000062944	87.3231	56.3937	63.6317	48.2336	54.1219	54.0562	69.1162	52.1372	0.40699	0.0929658	0.425885	9130023H24Rik	7	128234458	128238031	-	3574	protein_coding	RIKEN cDNA 9130023H24 gene [Source:MGI Symbol;Acc:MGI:2442738] && - && PF00096:Zinc finger, C2H2 type	-
ENSMUSG00000080002	5.32458	3.02109	4.17257	11.0006	11.9252	3.30956	4.17275	8.74512	-1.08502	0.0929676	1	Gm5566	5	149660765	149661223	-	459	processed_pseudogene	predicted pseudogene 5566 [Source:MGI Symbol;Acc:MGI:3648428] && sp|Q01768|NDKB_MOUSE Nucleoside diphosphate kinase B OS=Mus musculus OX=10090 GN=Nme2 PE=1 SV=1 && PF00334:Nucleoside diphosphate kinase	-
ENSMUSG00000098678	15.9737	16.1125	2.08629	24.5399	24.7676	15.4446	11.3908	21.5841	-0.925071	0.0931106	1	Mroh6	15	75884137	75888770	-	2216	protein_coding	maestro heat-like repeat family member 6 [Source:MGI Symbol;Acc:MGI:5011755] && sp|A6NGR9|MROH6_HUMAN Maestro heat-like repeat-containing protein family member 6 OS=Homo sapiens OX=9606 GN=MROH6 PE=4 SV=2 && -	-
ENSMUSG00000095663	0	0	1.04314	0	2.75196	5.51594	0.347714	2.75597	-2.87487	0.0931431	0.42651	Gm2310	15	8518683	8519953	-	1131	protein_coding	predicted gene 2310 [Source:MGI Symbol;Acc:MGI:3780481] && - && -	-
ENSMUSG00000052364	73.4792	52.3655	80.322	88.0051	67.8817	130.176	68.7222	95.3543	-0.469583	0.0932137	0.426645	B630019K06Rik	X	8892382	8894964	+	2583	protein_coding	RIKEN cDNA B630019K06 gene [Source:MGI Symbol;Acc:MGI:2147918] && sp|Q9UF56|FXL17_HUMAN F-box/LRR-repeat protein 17 OS=Homo sapiens OX=9606 GN=FBXL17 PE=1 SV=3 && -	-
ENSMUSG00000099583	11.7141	11.0773	3.12943	4.23101	3.66928	4.41275	8.64027	4.10435	1.07634	0.0932543	0.426645	Hist1h3d	13	23575763	23577011	+	1249	protein_coding	histone cluster 1, H3d [Source:MGI Symbol;Acc:MGI:2448322] && sp|P84227|H32_BOVIN Histone H3.2 OS=Bos taurus OX=9913 PE=1 SV=2 && PF00125:Core histone H2A/H2B/H3/H4	-
ENSMUSG00000025375	91.5827	73.5132	114.746	102.391	93.5667	205.193	93.2805	133.717	-0.516485	0.09331	0.426712	Aatk	11	120007313	120047167	-	7159	protein_coding	apoptosis-associated tyrosine kinase [Source:MGI Symbol;Acc:MGI:1197518] && sp|Q80YE4|LMTK1_MOUSE Serine/threonine-protein kinase LMTK1 OS=Mus musculus OX=10090 GN=Aatk PE=1 SV=1 && -	-
ENSMUSG00000105957	1.06492	6.04218	4.17257	5.92342	11.0078	7.72232	3.75989	8.21786	-1.11993	0.0934461	0.426782	Gm43254	3	133307518	133310008	-	2491	lincRNA	predicted gene 43254 [Source:MGI Symbol;Acc:MGI:5663391] && - && -	-
ENSMUSG00000026198	19.1685	18.1265	9.38829	31.3095	32.1062	13.2383	15.5611	25.5513	-0.723644	0.0934882	1	Abcb6	1	75171717	75180392	-	5315	protein_coding	ATP-binding cassette, sub-family B (MDR/TAP), member 6 [Source:MGI Symbol;Acc:MGI:1921354] && sp|Q9DC29|ABCB6_MOUSE ATP-binding cassette sub-family B member 6 OS=Mus musculus OX=10090 GN=Abcb6 PE=1 SV=1 && -	-
ENSMUSG00000074771	2.12983	4.02812	3.12943	0.846203	0.91732	1.10319	3.09579	0.95557	1.70897	0.0935115	0.426782	Ankef1	2	136501910	136562091	+	7185	protein_coding	ankyrin repeat and EF-hand domain containing 1 [Source:MGI Symbol;Acc:MGI:2441685] && sp|Q9D2J7|ANKE1_MOUSE Ankyrin repeat and EF-hand domain-containing protein 1 OS=Mus musculus OX=10090 GN=Ankef1 PE=2 SV=1 && -	-
ENSMUSG00000037243	291.787	324.264	244.096	347.789	343.995	338.679	286.715	343.488	-0.260569	0.0935192	0.426782	Zfp692	11	58307069	58314627	+	1963	protein_coding	zinc finger protein 692 [Source:MGI Symbol;Acc:MGI:2144276] && sp|Q3U381|ZN692_MOUSE Zinc finger protein 692 OS=Mus musculus OX=10090 GN=Znf692 PE=2 SV=1 && -	-
ENSMUSG00000065204	0	0	0	0	0.91732	6.61913	0	2.51215	-3.70501	0.0935378	0.426782	Gm24610	19	46359036	46359144	+	109	snoRNA	predicted gene, 24610 [Source:MGI Symbol;Acc:MGI:5454387] && - && -	-
ENSMUSG00000046794	61.7651	40.2812	50.0709	41.4639	42.1967	20.9606	50.7057	34.8737	0.530543	0.0935515	1	Ppp1r3b	8	35375739	35388139	+	6216	protein_coding	protein phosphatase 1, regulatory subunit 3B [Source:MGI Symbol;Acc:MGI:2177268] && sp|Q8C767|PPR3B_MOUSE Protein phosphatase 1 regulatory subunit 3B OS=Mus musculus OX=10090 GN=Ppp1r3b PE=1 SV=1 && -	-
ENSMUSG00000105395	6.38949	4.02812	2.08629	7.61582	5.50392	13.2383	4.16797	8.786	-1.06635	0.093556	0.426782	Gm42672	3	95461191	95461542	+	352	processed_pseudogene	predicted gene 42672 [Source:MGI Symbol;Acc:MGI:5662809] && sp|Q9CQC7|NDUB4_MOUSE NADH dehydrogenase [ubiquinone] 1 beta subcomplex subunit 4 OS=Mus musculus OX=10090 GN=Ndufb4 PE=1 SV=3 && -	-
ENSMUSG00000116789	1.06492	4.02812	5.21572	4.23101	7.33856	12.1351	3.43625	7.90155	-1.18338	0.0935709	0.426782	CT025521.2	16	57338310	57340403	+	1103	antisense	novel transcript, antisense to Cmss1 && - && -	-
ENSMUSG00000099681	24.4931	26.1828	33.3806	24.5399	39.4448	65.0881	28.0188	43.0243	-0.610448	0.0936397	0.426877	1700052K11Rik	11	105177726	105181433	-	3708	antisense	RIKEN cDNA 1700052K11 gene [Source:MGI Symbol;Acc:MGI:1920681] && - && -	-
ENSMUSG00000021185	191.685	191.336	143.954	230.167	199.976	216.225	175.658	215.456	-0.294777	0.0936737	0.426877	Dglucy	12	100779057	100896981	+	4599	protein_coding	D-glutamate cyclase [Source:MGI Symbol;Acc:MGI:2444813] && sp|Q8BH86|GLUCM_MOUSE D-glutamate cyclase, mitochondrial OS=Mus musculus OX=10090 GN=Dglucy PE=1 SV=1 && PF14336:Domain of unknown function (DUF4392)|PF07286:Protein of unknown function (DUF1445)	-
ENSMUSG00000092085	0	0	0	0.846203	0.91732	3.30956	0	1.69103	-3.13125	0.0937333	0.426901	Gm17224	1	172213021	172213680	+	500	antisense	predicted gene 17224 [Source:MGI Symbol;Acc:MGI:4938051] && sp|O09165|CASQ1_MOUSE Calsequestrin-1 OS=Mus musculus OX=10090 GN=Casq1 PE=1 SV=3 && -	-
ENSMUSG00000090141	0	0	0	0.846203	0.91732	3.30956	0	1.69103	-3.13125	0.0937609	0.426901	Gm614	X	101261376	101263992	-	774	protein_coding	predicted gene 614 [Source:MGI Symbol;Acc:MGI:2685460] && sp|Q3V2K1|CX065_MOUSE Uncharacterized protein CXorf65 homolog OS=Mus musculus OX=10090 GN=Gm614 PE=2 SV=1 && PF15874:Putative Interleukin 2 receptor, gamma chain	-
ENSMUSG00000112581	0	0	0	0.846203	0.91732	3.30956	0	1.69103	-3.13125	0.093835	0.426961	1700022H01Rik	10	61674789	61680255	-	387	bidirectional_promoter_lncRNA	RIKEN cDNA 1700022H01 gene [Source:MGI Symbol;Acc:MGI:1922789] && - && -	-
ENSMUSG00000042377	0	0	0	0.846203	0.91732	3.30956	0	1.69103	-3.13125	0.0939399	1	Fam83g	11	61684091	61709951	+	6659	protein_coding	family with sequence similarity 83, member G [Source:MGI Symbol;Acc:MGI:1916890] && sp|Q5SWY7|FA83G_MOUSE Protein FAM83G OS=Mus musculus OX=10090 GN=Fam83g PE=1 SV=1 && PF07894:FAM83 A-H	-
ENSMUSG00000067847	249.19	269.884	355.712	348.635	383.44	339.782	291.595	357.286	-0.293334	0.0939837	0.426961	Romo1	2	156144039	156145797	+	747	protein_coding	reactive oxygen species modulator 1 [Source:MGI Symbol;Acc:MGI:1914317] && sp|Q3SZV8|ROMO1_BOVIN Reactive oxygen species modulator 1 OS=Bos taurus OX=9913 GN=ROMO1 PE=3 SV=1 && -	-
ENSMUSG00000082424	0	0	0	1.69241	0.91732	2.20638	0	1.60537	-3.06653	0.0939874	0.426961	Gm13292	2	11409031	11410030	-	1000	processed_pseudogene	predicted gene 13292 [Source:MGI Symbol;Acc:MGI:3649470] && sp|P16858|G3P_MOUSE Glyceraldehyde-3-phosphate dehydrogenase OS=Mus musculus OX=10090 GN=Gapdh PE=1 SV=2 && PF00044:Glyceraldehyde 3-phosphate dehydrogenase, NAD binding domain|PF02800:Glyceraldehyde 3-phosphate dehydrogenase, C-terminal domain	-
ENSMUSG00000097086	0	0	0	1.69241	0.91732	2.20638	0	1.60537	-3.06653	0.0939939	1	Gm7672	10	22046114	22046985	-	872	processed_pseudogene	predicted gene 7672 [Source:MGI Symbol;Acc:MGI:3647232] && sp|Q6ZUT1|NKAP1_HUMAN Uncharacterized protein NKAPD1 OS=Homo sapiens OX=9606 GN=NKAPD1 PE=1 SV=2 && -	-
ENSMUSG00000102419	0	0	0	1.69241	0.91732	2.20638	0	1.60537	-3.06653	0.0940231	0.426961	Gm36940	9	56414031	56416066	-	2036	TEC	predicted gene, 36940 [Source:MGI Symbol;Acc:MGI:5610168] && - && -	-
ENSMUSG00000009356	0	0	0	1.69241	0.91732	2.20638	0	1.60537	-3.06653	0.0940346	0.426961	Lpo	11	87806428	87828289	-	3135	protein_coding	lactoperoxidase [Source:MGI Symbol;Acc:MGI:1923363] && sp|Q8R481|PERL_MESAU Lactoperoxidase OS=Mesocricetus auratus OX=10036 GN=LPO PE=1 SV=1 && -	-
ENSMUSG00000098813	24.4931	27.1898	14.604	42.3101	33.9409	23.167	22.0956	33.1393	-0.590871	0.0940351	0.426961	Gm27326	11	97780182	97780276	-	95	snoRNA	predicted gene, 27326 [Source:MGI Symbol;Acc:MGI:5530708] && - && -	-
ENSMUSG00000054412	1.06492	1.00703	2.08629	5.92342	1.83464	4.41275	1.38608	4.05694	-1.55302	0.0941093	0.426961	Gm4793	1	135584773	135599948	+	2616	antisense	predicted gene 4793 [Source:MGI Symbol;Acc:MGI:3646955] && sp|Q8CH77|NAV1_MOUSE Neuron navigator 1 OS=Mus musculus OX=10090 GN=Nav1 PE=1 SV=2 && -	-
ENSMUSG00000103756	9.58424	10.0703	8.34515	12.693	17.4291	15.4446	9.33323	15.1889	-0.699818	0.0941181	0.426961	Gm37285	1	66799659	66800797	-	1139	TEC	predicted gene, 37285 [Source:MGI Symbol;Acc:MGI:5610513] && - && -	-
ENSMUSG00000105826	21.2983	10.0703	7.302	9.30823	6.42124	4.41275	12.8902	6.71407	0.924374	0.0942039	0.426961	Gm42141	5	105495470	105497641	+	2172	TEC	predicted gene, 42141 [Source:MGI Symbol;Acc:MGI:5625026] && - && -	-
ENSMUSG00000056055	10.6492	11.0773	19.8197	15.2316	18.3464	36.4052	13.8487	23.3278	-0.74182	0.0942536	0.426961	Sag	1	87803680	87845158	+	8904	protein_coding	S-antigen, retina and pineal gland (arrestin) [Source:MGI Symbol;Acc:MGI:98227] && sp|P20443|ARRS_MOUSE S-arrestin OS=Mus musculus OX=10090 GN=Sag PE=1 SV=1 && -	-
ENSMUSG00000029153	62.83	54.3796	44.8552	46.5411	43.1141	26.4765	54.0216	38.7106	0.472447	0.0942546	0.426961	Ociad2	5	73322199	73341028	-	2722	protein_coding	OCIA domain containing 2 [Source:MGI Symbol;Acc:MGI:1916377] && sp|Q9D8W7|OCAD2_MOUSE OCIA domain-containing protein 2 OS=Mus musculus OX=10090 GN=Ociad2 PE=1 SV=1 && PF07051:Ovarian carcinoma immunoreactive antigen (OCIA)	-
ENSMUSG00000087196	2.12983	0	0	4.23101	2.75196	2.20638	0.709944	3.06312	-2.13659	0.0942875	0.426961	Gm13373	2	28315016	28324050	-	655	lincRNA	predicted gene 13373 [Source:MGI Symbol;Acc:MGI:3650390] && - && -	-
ENSMUSG00000030929	242.801	223.561	204.456	176.856	197.224	187.542	223.606	187.207	0.256543	0.0943433	1	Eri2	7	119768679	119794058	-	7170	protein_coding	exoribonuclease 2 [Source:MGI Symbol;Acc:MGI:1918401] && sp|Q5BKS4|ERI2_MOUSE ERI1 exoribonuclease 2 OS=Mus musculus OX=10090 GN=Eri2 PE=2 SV=1 && -	-
ENSMUSG00000099471	47.9212	52.3655	87.624	87.1589	72.4683	97.0806	62.6369	85.5693	-0.448755	0.094359	1	Gm8451	1	127282662	127283108	-	447	processed_pseudogene	predicted gene 8451 [Source:MGI Symbol;Acc:MGI:3644810] && sp|P14115|RL27A_MOUSE 60S ribosomal protein L27a OS=Mus musculus OX=10090 GN=Rpl27a PE=1 SV=5 && PF00828:Ribosomal proteins 50S-L15, 50S-L18e, 60S-L27A	-
ENSMUSG00000031258	4.25966	3.02109	6.25886	3.38481	7.33856	19.8574	4.5132	10.1936	-1.15866	0.0943845	0.426961	Xkrx	X	134149043	134162076	-	3024	protein_coding	X-linked Kx blood group related, X-linked [Source:MGI Symbol;Acc:MGI:3584011] && sp|Q5GH68|XKR2_MOUSE XK-related protein 2 OS=Mus musculus OX=10090 GN=Xkrx PE=2 SV=1 && PF09815:XK-related protein	-
ENSMUSG00000038060	2.12983	1.00703	0	0.846203	6.42124	4.41275	1.04562	3.8934	-1.89436	0.0943849	0.426961	Dlec1	9	119102478	119148246	+	6696	protein_coding	deleted in lung and esophageal cancer 1 [Source:MGI Symbol;Acc:MGI:2443671] && sp|Q9Y238|DLEC1_HUMAN Deleted in lung and esophageal cancer protein 1 OS=Homo sapiens OX=9606 GN=DLEC1 PE=1 SV=2 && -	-
ENSMUSG00000054003	3.19475	0	2.08629	5.07722	6.42124	3.30956	1.76034	4.93601	-1.5057	0.0943885	0.426961	Tdrd9	12	111971559	112068854	+	5415	protein_coding	tudor domain containing 9 [Source:MGI Symbol;Acc:MGI:1921941] && sp|Q14BI7|TDRD9_MOUSE ATP-dependent RNA helicase TDRD9 OS=Mus musculus OX=10090 GN=Tdrd9 PE=1 SV=3 && PF00271:Helicase conserved C-terminal domain|PF00567:Tudor domain|PF00270:DEAD/DEAH box helicase|PF04408:Helicase associated domain (HA2)	-
ENSMUSG00000051832	2.12983	0	1.04314	2.53861	2.75196	5.51594	1.05766	3.60217	-1.76846	0.0944467	0.427038	E230016K23Rik	11	83582056	83623693	+	2816	processed_transcript	RIKEN cDNA E230016K23 gene [Source:MGI Symbol;Acc:MGI:3041204] && - && -	-
ENSMUSG00000001983	218.308	241.687	238.88	162.471	200.893	214.019	232.958	192.461	0.277778	0.0947093	0.427622	Taco1	11	106066061	106073612	+	1383	protein_coding	translational activator of mitochondrially encoded cytochrome c oxidase I [Source:MGI Symbol;Acc:MGI:1917457] && sp|Q8K0Z7|TACO1_MOUSE Translational activator of cytochrome c oxidase 1 OS=Mus musculus OX=10090 GN=Taco1 PE=1 SV=1 && PF01709:Transcriptional regulator	-
ENSMUSG00000085609	2.12983	0	1.04314	3.38481	2.75196	4.41275	1.05766	3.51651	-1.74194	0.0947285	0.427622	1700016P03Rik	11	75172560	75177633	+	863	processed_transcript	RIKEN cDNA 1700016P03 gene [Source:MGI Symbol;Acc:MGI:1922792] && - && -	-
ENSMUSG00000046952	6.38949	3.02109	14.604	5.07722	3.66928	1.10319	8.00486	3.28323	1.25718	0.0947293	0.427622	Gm5815	17	58593614	58594840	+	1227	processed_pseudogene	predicted pseudogene 5815 [Source:MGI Symbol;Acc:MGI:3648184] && sp|Q8K3I9|GLCI1_MOUSE Glucocorticoid-induced transcript 1 protein OS=Mus musculus OX=10090 GN=Glcci1 PE=1 SV=1 && PF15388:Protein Family FAM117	-
ENSMUSG00000103970	0	0	3.12943	9.30823	1.83464	2.20638	1.04314	4.44975	-2.10594	0.0947509	0.427622	Gm37678	9	108544214	108545359	+	1146	TEC	predicted gene, 37678 [Source:MGI Symbol;Acc:MGI:5610906] && sp|Q0P5J0|QRIC1_BOVIN Transcriptional regulator QRICH1 OS=Bos taurus OX=9913 GN=QRICH1 PE=2 SV=2 && -	-
ENSMUSG00000045506	4.25966	10.0703	2.08629	8.46203	14.6771	9.92869	5.47208	11.0226	-1.00468	0.0947774	1	A930002H24Rik	17	63863300	63863791	-	492	protein_coding	RIKEN cDNA A930002H24 gene [Source:MGI Symbol;Acc:MGI:2443151] && - && -	-
ENSMUSG00000042268	3.19475	2.01406	22.9492	0	1.83464	6.61913	9.38599	2.81792	1.76972	0.0947809	0.427622	Slc26a9	1	131744022	131771504	+	5226	protein_coding	solute carrier family 26, member 9 [Source:MGI Symbol;Acc:MGI:2444594] && sp|Q8BU91|S26A9_MOUSE Solute carrier family 26 member 9 OS=Mus musculus OX=10090 GN=Slc26a9 PE=1 SV=1 && PF00916:Sulfate permease family|PF01740:STAS domain	-
ENSMUSG00000107390	1.06492	0	0	0.846203	4.5866	1.10319	0.354972	2.17866	-2.55455	0.0948767	0.427869	Gm43323	5	66080209	66084466	-	4258	TEC	predicted gene 43323 [Source:MGI Symbol;Acc:MGI:5663460] && - && -	-
ENSMUSG00000056185	466.433	398.784	312.943	479.797	475.172	479.887	392.72	478.285	-0.284469	0.0948899	1	Snx32	19	5495278	5510489	-	1650	protein_coding	sorting nexin 32 [Source:MGI Symbol;Acc:MGI:2444704] && sp|Q80ZJ7|SNX32_MOUSE Sorting nexin-32 OS=Mus musculus OX=10090 GN=Snx32 PE=2 SV=1 && PF09325:Vps5 C terminal like|PF00787:PX domain	-
ENSMUSG00000074218	2.12983	9.06327	5.21572	16.0779	13.7598	4.41275	5.4696	11.4168	-1.06806	0.0948969	1	Cox7a1	7	30184144	30186078	+	535	protein_coding	cytochrome c oxidase subunit 7A1 [Source:MGI Symbol;Acc:MGI:1316714] && sp|P56392|CX7A1_MOUSE Cytochrome c oxidase subunit 7A1, mitochondrial OS=Mus musculus OX=10090 GN=Cox7a1 PE=1 SV=1 && -	-
ENSMUSG00000094683	8.51932	3.02109	4.17257	5.92342	11.0078	14.3414	5.23766	10.4242	-0.986935	0.094913	1	Ap3m1-ps	10	82585426	82586683	+	1258	processed_pseudogene	adaptor-related protein complex 3, mu 1 subunit, pseudogene [Source:MGI Symbol;Acc:MGI:3645307] && sp|Q9JKC8|AP3M1_MOUSE AP-3 complex subunit mu-1 OS=Mus musculus OX=10090 GN=Ap3m1 PE=1 SV=1 && PF01217:Clathrin adaptor complex small chain|PF00928:Adaptor complexes medium subunit family	-
ENSMUSG00000070166	4.25966	0	3.12943	0	0.91732	0	2.46303	0.305773	2.85268	0.0950107	0.428288	Gm25821	12	21287927	21288059	+	133	snoRNA	predicted gene, 25821 [Source:MGI Symbol;Acc:MGI:5455598] && - && -	-
ENSMUSG00000105272	40.4668	33.232	27.1217	44.0025	43.1141	49.6435	33.6068	45.5867	-0.438333	0.0950148	1	Gm43071	3	106567605	106569636	+	2032	TEC	predicted gene 43071 [Source:MGI Symbol;Acc:MGI:5663208] && - && -	-
ENSMUSG00000062480	12.779	19.1336	15.6471	5.92342	11.9252	11.0319	15.8532	9.62682	0.731066	0.0951912	0.428793	Acat3	17	12923813	12940600	-	2427	protein_coding	acetyl-Coenzyme A acetyltransferase 3 [Source:MGI Symbol;Acc:MGI:109182] && sp|Q8CAY6|THIC_MOUSE Acetyl-CoA acetyltransferase, cytosolic OS=Mus musculus OX=10090 GN=Acat2 PE=1 SV=2 && PF02803:Thiolase, C-terminal domain|PF00108:Thiolase, N-terminal domain	-
ENSMUSG00000025991	5.32458	6.04218	0	0	1.83464	0	3.78892	0.611547	2.61196	0.0952406	0.428793	Cps1	1	67123026	67231259	+	5555	protein_coding	carbamoyl-phosphate synthetase 1 [Source:MGI Symbol;Acc:MGI:891996] && sp|Q8C196|CPSM_MOUSE Carbamoyl-phosphate synthase [ammonia], mitochondrial OS=Mus musculus OX=10090 GN=Cps1 PE=1 SV=2 && PF18302:Carbamoyl phosphate synthetase C-terminal domain|PF02142:MGS-like domain|PF00988:Carbamoyl-phosphate synthase small chain, CPSase domain|PF02787:Carbamoyl-phosphate synthetase large chain, oligomeris…	-
ENSMUSG00000035829	66.0248	54.3796	52.1572	69.3886	66.0471	89.3583	57.5205	74.9313	-0.378214	0.0952461	0.428793	Ppp1r26	2	28446800	28455508	+	5619	protein_coding	protein phosphatase 1, regulatory subunit 26 [Source:MGI Symbol;Acc:MGI:2685193] && sp|Q6A025|PPR26_MOUSE Protein phosphatase 1 regulatory subunit 26 OS=Mus musculus OX=10090 GN=Ppp1r26 PE=2 SV=2 && PF15740:Protein phosphatase 1 regulatory subunit 26 N-terminus	-
ENSMUSG00000112163	6.38949	9.06327	8.34515	14.3854	17.4291	8.82551	7.93263	13.5467	-0.779233	0.0953163	0.428898	Gm8188	10	82430704	82432393	+	1690	processed_pseudogene	predicted gene 8188 [Source:MGI Symbol;Acc:MGI:3646272] && sp|O43318|M3K7_HUMAN Mitogen-activated protein kinase kinase kinase 7 OS=Homo sapiens OX=9606 GN=MAP3K7 PE=1 SV=1 && -	-
ENSMUSG00000056617	4.25966	3.02109	0	0	0	1.10319	2.42692	0.367729	2.83411	0.0953518	0.428898	4931429L15Rik	9	46303361	46319986	-	2125	protein_coding	RIKEN cDNA 4931429L15 gene [Source:MGI Symbol;Acc:MGI:1921611] && - && -	-
ENSMUSG00000082171	1.06492	0	3.12943	3.38481	1.83464	8.82551	1.39812	4.68165	-1.73398	0.0954396	1	Rpl27-ps2	11	101939501	101939899	+	399	processed_pseudogene	ribosomal protein L27, pseudogene 2 [Source:MGI Symbol;Acc:MGI:3649792] && sp|P61356|RL27_BOVIN 60S ribosomal protein L27 OS=Bos taurus OX=9913 GN=RPL27 PE=2 SV=2 && PF01777:Ribosomal L27e protein family	-
ENSMUSG00000117303	14.9088	7.04921	0	4.23101	0.91732	0	7.31934	1.71611	2.05735	0.0954646	0.42922	CT025652.2	17	28326953	28328521	-	1569	bidirectional_promoter_lncRNA	novel transcript && - && -	-
ENSMUSG00000081798	0	0	1.04314	1.69241	0	6.61913	0.347714	2.77051	-2.88169	0.0955256	0.429309	Gm8152	5	107381381	107382017	-	637	processed_pseudogene	predicted gene 8152 [Source:MGI Symbol;Acc:MGI:3644504] && sp|P10103|HMGB1_BOVIN High mobility group protein B1 OS=Bos taurus OX=9913 GN=HMGB1 PE=1 SV=3 && PF09011:HMG-box domain	-
ENSMUSG00000020935	829.569	885.179	809.479	723.503	787.061	670.738	841.409	727.101	0.210284	0.0956135	0.429382	Dcakd	11	102994047	103028333	-	2556	protein_coding	dephospho-CoA kinase domain containing [Source:MGI Symbol;Acc:MGI:1915337] && sp|Q8BHC4|DCAKD_MOUSE Dephospho-CoA kinase domain-containing protein OS=Mus musculus OX=10090 GN=Dcakd PE=1 SV=1 && PF01121:Dephospho-CoA kinase	-
ENSMUSG00000113651	6.38949	13.0914	15.6471	4.23101	8.25588	6.61913	11.7093	6.36868	0.886113	0.0956625	0.429382	Gm4900	13	3138485	3140112	-	1628	processed_pseudogene	predicted gene 4900 [Source:MGI Symbol;Acc:MGI:3646967] && sp|Q00438|PTBP1_RAT Polypyrimidine tract-binding protein 1 OS=Rattus norvegicus OX=10116 GN=Ptbp1 PE=1 SV=1 && -	-
ENSMUSG00000024292	3.19475	0	4.17257	0.846203	0	0	2.45577	0.282068	2.84901	0.0956654	0.429382	Cyp4f14	17	32905071	32917342	-	2405	protein_coding	cytochrome P450, family 4, subfamily f, polypeptide 14 [Source:MGI Symbol;Acc:MGI:1927669] && sp|Q9EP75|CP4FE_MOUSE Leukotriene-B4 omega-hydroxylase 3 OS=Mus musculus OX=10090 GN=Cyp4f14 PE=1 SV=1 && PF00067:Cytochrome P450	-
ENSMUSG00000088233	3.19475	0	3.12943	0	0	0	2.10806	0	3.59121	0.0958716	1	Gm25428	8	123471384	123471497	+	114	snoRNA	predicted gene, 25428 [Source:MGI Symbol;Acc:MGI:5455205] && - && -	-
ENSMUSG00000056492	6.38949	12.0844	0	3.38481	0.91732	0	6.15795	1.43404	2.06501	0.0958861	0.430147	Adgrf5	17	43360451	43459557	+	9010	protein_coding	adhesion G protein-coupled receptor F5 [Source:MGI Symbol;Acc:MGI:2182928] && sp|G5E8Q8|AGRF5_MOUSE Adhesion G protein-coupled receptor F5 OS=Mus musculus OX=10090 GN=Adgrf5 PE=1 SV=1 && PF07679:Immunoglobulin I-set domain|PF00002:7 transmembrane receptor (Secretin family)|PF16489:GPCR-Autoproteolysis INducing (GAIN) domain|PF01390:SEA domain|PF00047:Immunoglobulin domain|PF01825:GPCR proteolysis…	-
ENSMUSG00000021033	236.411	244.708	243.052	260.63	280.7	316.615	241.391	285.982	-0.242949	0.0959185	0.430147	Gstz1	12	87147165	87164723	+	5088	protein_coding	glutathione transferase zeta 1 (maleylacetoacetate isomerase) [Source:MGI Symbol;Acc:MGI:1341859] && sp|P11365|GAG_IPMA Intracisternal A-particle Gag-related polyprotein OS=Mouse intracisternal a-particle MIA14 OX=11753 GN=gag PE=3 SV=2 && PF14787:GAG-polyprotein viral zinc-finger|PF00607:gag gene protein p24 (core nucleocapsid protein)|PF00098:Zinc knuckle	-
ENSMUSG00000071202	12.779	15.1054	9.38829	27.9247	20.181	12.1351	12.4242	20.0803	-0.702171	0.0960305	0.430284	Ccdc78	17	25786580	25790513	+	1651	protein_coding	coiled-coil domain containing 78 [Source:MGI Symbol;Acc:MGI:2685784] && sp|D3Z5T1|CCD78_MOUSE Coiled-coil domain-containing protein 78 OS=Mus musculus OX=10090 GN=Ccdc78 PE=3 SV=2 && PF14739:Domain of unknown function (DUF4472)	-
ENSMUSG00000117297	1.06492	4.02812	0	7.61582	1.83464	6.61913	1.69768	5.35653	-1.64622	0.0961031	0.430284	CT571247.2	17	57068260	57069360	-	219	sense_intronic	novel transcript, sense intronic to Dennd1c && - && -	-
ENSMUSG00000042340	45.7914	51.3585	44.8552	35.5405	42.1967	26.4765	47.335	34.7379	0.440571	0.0961127	0.430284	Ctf1	7	127712736	127718192	+	1824	protein_coding	cardiotrophin 1 [Source:MGI Symbol;Acc:MGI:105115] && sp|Q60753|CTF1_MOUSE Cardiotrophin-1 OS=Mus musculus OX=10090 GN=Ctf1 PE=2 SV=1 && -	-
ENSMUSG00000047671	5.32458	4.02812	5.21572	7.61582	6.42124	14.3414	4.85614	9.4595	-0.949269	0.096114	0.430284	Tctex1d4	4	117126794	117128738	+	1111	protein_coding	Tctex1 domain containing 4 [Source:MGI Symbol;Acc:MGI:3045358] && sp|Q8CDY7|DYLT4_MOUSE Dynein light chain Tctex-type 4 OS=Mus musculus OX=10090 GN=Dynlt4 PE=1 SV=1 && PF03645:Tctex-1 family	-
ENSMUSG00000050565	4523.76	4729.01	4453.18	3998.31	4216	3953.83	4568.65	4056.05	0.171675	0.0961296	1	Tor1aip2	1	156035403	156068861	+	9218	protein_coding	torsin A interacting protein 2 [Source:MGI Symbol;Acc:MGI:3582695] && sp|Q8BYU6|TOIP2_MOUSE Torsin-1A-interacting protein 2 OS=Mus musculus OX=10090 GN=Tor1aip2 PE=1 SV=1 && -	-
ENSMUSG00000079343	35.1422	13.0914	10.4314	14.3854	11.9252	4.41275	19.555	10.2411	0.917148	0.096154	1	C1s2	6	124624625	124636085	-	2662	protein_coding	complement component 1, s subcomponent 2 [Source:MGI Symbol;Acc:MGI:3644269] && sp|Q8CFG8|CS1B_MOUSE Complement C1s-B subcomponent OS=Mus musculus OX=10090 GN=C1sb PE=2 SV=1 && PF14670:Coagulation Factor Xa inhibitory site|PF00431:CUB domain|PF00084:Sushi repeat (SCR repeat)|PF00089:Trypsin	-
ENSMUSG00000032417	19.1685	29.2039	47.9846	18.6165	10.0905	29.7861	32.119	19.4977	0.729584	0.0962262	0.430298	Rwdd2a	9	86571991	86574899	+	1380	protein_coding	RWD domain containing 2A [Source:MGI Symbol;Acc:MGI:1916769] && sp|Q9D9S3|RWD2A_MOUSE RWD domain-containing protein 2A OS=Mus musculus OX=10090 GN=Rwdd2a PE=1 SV=1 && PF06544:Protein of unknown function (DUF1115)|PF05773:RWD domain	-
ENSMUSG00000001131	484.537	451.149	431.861	434.102	386.192	317.718	455.849	379.337	0.263535	0.0963523	0.430298	Timp1	X	20870166	20874735	+	888	protein_coding	tissue inhibitor of metalloproteinase 1 [Source:MGI Symbol;Acc:MGI:98752] && sp|P12032|TIMP1_MOUSE Metalloproteinase inhibitor 1 OS=Mus musculus OX=10090 GN=Timp1 PE=1 SV=2 && PF00965:Tissue inhibitor of metalloproteinase	-
ENSMUSG00000031125	19.1685	28.1968	29.208	5.07722	19.2637	20.9606	25.5244	15.1005	0.770528	0.0963709	0.430298	3830403N18Rik	X	56136572	56153498	+	1022	protein_coding	RIKEN cDNA 3830403N18 gene [Source:MGI Symbol;Acc:MGI:1917941] && sp|P05531|XLR_MOUSE X-linked lymphocyte-regulated protein PM1 OS=Mus musculus OX=10090 GN=Xlr PE=2 SV=1 && PF04803:Cor1/Xlr/Xmr conserved region	-
ENSMUSG00000057778	158.672	145.012	133.522	115.084	114.665	130.176	145.736	119.975	0.282306	0.0963783	0.430298	Cyb5d2	11	72777232	72796142	-	5143	protein_coding	cytochrome b5 domain containing 2 [Source:MGI Symbol;Acc:MGI:2684848] && sp|Q5SSH8|NEUFC_MOUSE Neuferricin OS=Mus musculus OX=10090 GN=Cyb5d2 PE=1 SV=1 && -	-
ENSMUSG00000051984	34.0773	8.05624	20.8629	30.4633	22.933	55.1594	20.9988	36.1852	-0.782763	0.0964275	0.430298	Sec31b	19	44516957	44545864	-	3950	protein_coding	Sec31 homolog B (S. cerevisiae) [Source:MGI Symbol;Acc:MGI:2685187] && sp|Q3TZ89|SC31B_MOUSE Protein transport protein Sec31B OS=Mus musculus OX=10090 GN=Sec31b PE=1 SV=2 && -	-
ENSMUSG00000030711	20.2334	9.06327	6.25886	29.6171	26.6023	8.82551	11.8518	21.6816	-0.881948	0.0965148	0.430298	Sult1a1	7	126672865	126676432	-	1507	protein_coding	sulfotransferase family 1A, phenol-preferring, member 1 [Source:MGI Symbol;Acc:MGI:102896] && sp|P52840|ST1A1_MOUSE Sulfotransferase 1A1 OS=Mus musculus OX=10090 GN=Sult1a1 PE=1 SV=1 && PF00685:Sulfotransferase domain	-
ENSMUSG00000097056	33.0124	21.1476	34.4237	16.9241	11.9252	28.6829	29.5279	19.1774	0.633674	0.0965354	0.430298	Gm4262	16	11008898	11015186	+	1986	lincRNA	predicted gene 4262 [Source:MGI Symbol;Acc:MGI:3782439] && - && -	-
ENSMUSG00000103423	0	1.00703	2.08629	5.92342	7.33856	0	1.03111	4.42066	-2.10873	0.0965584	0.430298	Gm5845	3	33621608	33622403	+	796	processed_pseudogene	predicted gene 5845 [Source:MGI Symbol;Acc:MGI:3649050] && sp|P12970|RL7A_MOUSE 60S ribosomal protein L7a OS=Mus musculus OX=10090 GN=Rpl7a PE=1 SV=2 && PF01248:Ribosomal protein L7Ae/L30e/S12e/Gadd45 family	-
ENSMUSG00000102448	1.06492	0	0	0	4.5866	3.30956	0.354972	2.63206	-2.81606	0.0965714	0.430298	Gm37101	1	138567697	138571356	-	3660	TEC	predicted gene, 37101 [Source:MGI Symbol;Acc:MGI:5610329] && - && -	-
ENSMUSG00000101845	6.38949	3.02109	1.04314	6.76962	14.6771	3.30956	3.48457	8.2521	-1.25546	0.0965762	0.430298	Gm28198	7	127559142	127573116	-	471	antisense	predicted gene 28198 [Source:MGI Symbol;Acc:MGI:5578904] && sp|Q6ZRS2|SRCAP_HUMAN Helicase SRCAP OS=Homo sapiens OX=9606 GN=SRCAP PE=1 SV=3 && -	-
ENSMUSG00000098488	17.0386	12.0844	15.6471	27.9247	31.1889	12.1351	14.9234	23.7496	-0.681136	0.0965808	0.430298	Pla2g4b	2	120033417	120043030	+	5831	protein_coding	phospholipase A2, group IVB (cytosolic) [Source:MGI Symbol;Acc:MGI:2384819] && sp|P0C871|PA24B_MOUSE Cytosolic phospholipase A2 beta OS=Mus musculus OX=10090 GN=Pla2g4b PE=1 SV=1 && -	-
ENSMUSG00000081343	0	0	1.04314	0	4.5866	3.30956	0.347714	2.63206	-2.81607	0.0966603	0.430298	Gm16071	9	31094202	31094994	+	793	processed_pseudogene	predicted gene 16071 [Source:MGI Symbol;Acc:MGI:3801777] && sp|P12970|RL7A_MOUSE 60S ribosomal protein L7a OS=Mus musculus OX=10090 GN=Rpl7a PE=1 SV=2 && PF01248:Ribosomal protein L7Ae/L30e/S12e/Gadd45 family	-
ENSMUSG00000103591	4.25966	2.01406	3.12943	4.23101	6.42124	9.92869	3.13438	6.86032	-1.11982	0.0966889	0.430298	Gm38365	1	87897540	87900532	+	2993	TEC	predicted gene, 38365 [Source:MGI Symbol;Acc:MGI:5611593] && - && -	-
ENSMUSG00000020482	992.501	1039.25	1243.43	935.054	911.816	958.671	1091.73	935.18	0.223397	0.0966953	0.430298	Ccdc117	11	5528887	5542187	-	3372	protein_coding	coiled-coil domain containing 117 [Source:MGI Symbol;Acc:MGI:2144383] && sp|Q6PB51|CC117_MOUSE Coiled-coil domain-containing protein 117 OS=Mus musculus OX=10090 GN=Ccdc117 PE=1 SV=1 && PF15810:Coiled-coil domain-containing protein 117	-
ENSMUSG00000114557	0	1.00703	0	3.38481	0	4.41275	0.335677	2.59919	-2.7986	0.0968856	1	Gm8345	13	78953088	78954792	-	1705	processed_pseudogene	predicted gene 8345 [Source:MGI Symbol;Acc:MGI:3649106] && sp|Q9UG63|ABCF2_HUMAN ATP-binding cassette sub-family F member 2 OS=Homo sapiens OX=9606 GN=ABCF2 PE=1 SV=2 && -	-
ENSMUSG00000103723	0	0	0	1.69241	1.83464	1.10319	0	1.54341	-3.01963	0.0968907	0.43087	Gm37095	1	191000594	191000798	-	205	processed_pseudogene	predicted gene, 37095 [Source:MGI Symbol;Acc:MGI:5610323] && sp|Q3ZAQ7|VMA21_HUMAN Vacuolar ATPase assembly integral membrane protein VMA21 OS=Homo sapiens OX=9606 GN=VMA21 PE=1 SV=1 && -	-
ENSMUSG00000083569	0	0	0	1.69241	1.83464	1.10319	0	1.54341	-3.01963	0.0969064	0.43087	Gm13666	2	73131745	73132543	+	799	processed_pseudogene	predicted gene 13666 [Source:MGI Symbol;Acc:MGI:3651577] && sp|P12970|RL7A_MOUSE 60S ribosomal protein L7a OS=Mus musculus OX=10090 GN=Rpl7a PE=1 SV=2 && -	-
ENSMUSG00000097789	0	0	0	1.69241	1.83464	1.10319	0	1.54341	-3.01963	0.096975	1	Gm2115	7	84528954	84583531	+	7340	protein_coding	predicted gene 2115 [Source:MGI Symbol;Acc:MGI:3780284] && sp|A0A1B0GTU2|CTXD1_HUMAN Cortexin domain-containing 1 OS=Homo sapiens OX=9606 GN=CTXND1 PE=3 SV=1 && -	-
ENSMUSG00000090036	0	0	0	1.69241	1.83464	1.10319	0	1.54341	-3.01963	0.0970233	0.431206	Gm15900	10	127948219	127948560	-	342	processed_pseudogene	predicted gene 15900 [Source:MGI Symbol;Acc:MGI:3801848] && sp|P97366|EVI5_MOUSE Ecotropic viral integration site 5 protein OS=Mus musculus OX=10090 GN=Evi5 PE=1 SV=2 && -	-
ENSMUSG00000085941	0	0	0	1.69241	1.83464	1.10319	0	1.54341	-3.01963	0.0971027	1	Gm11201	11	79023597	79031057	+	701	antisense	predicted gene 11201 [Source:MGI Symbol;Acc:MGI:3649951] && sp|Q8IVT5|KSR1_HUMAN Kinase suppressor of Ras 1 OS=Homo sapiens OX=9606 GN=KSR1 PE=1 SV=3 && -	-
ENSMUSG00000102927	3.19475	0	3.12943	7.61582	4.5866	4.41275	2.10806	5.53839	-1.40978	0.0971156	0.431392	Gm37152	1	86580058	86581232	+	1175	TEC	predicted gene, 37152 [Source:MGI Symbol;Acc:MGI:5610380] && - && -	-
ENSMUSG00000049588	28.7527	36.2531	36.51	46.5411	62.3778	33.0956	33.8386	47.3382	-0.488431	0.09718	0.431392	Ccdc69	11	55049731	55078131	-	1848	protein_coding	coiled-coil domain containing 69 [Source:MGI Symbol;Acc:MGI:1196234] && sp|Q3TCJ8|CCD69_MOUSE Coiled-coil domain-containing protein 69 OS=Mus musculus OX=10090 GN=Ccdc69 PE=1 SV=1 && -	-
ENSMUSG00000057262	33.0124	14.0984	11.4746	41.4639	28.4369	24.2701	19.5285	31.3903	-0.69157	0.0971894	0.431392	Gm10020	15	52477617	52478228	-	612	processed_pseudogene	predicted pseudogene 10020 [Source:MGI Symbol;Acc:MGI:3642192] && sp|Q5EAD6|RL15_BOVIN 60S ribosomal protein L15 OS=Bos taurus OX=9913 GN=RPL15 PE=2 SV=3 && PF00827:Ribosomal L15	-
ENSMUSG00000026489	33.0124	22.1547	26.0786	22.8475	12.8425	18.7542	27.0819	18.1481	0.574184	0.0973282	0.431824	Coq8a	1	180165238	180199602	-	5293	protein_coding	coenzyme Q8A [Source:MGI Symbol;Acc:MGI:1914676] && sp|Q60936|COQ8A_MOUSE Atypical kinase COQ8A, mitochondrial OS=Mus musculus OX=10090 GN=Coq8a PE=1 SV=2 && PF03109:ABC1 family	-
ENSMUSG00000056203	3.19475	4.02812	0	0.846203	0	0	2.40762	0.282068	2.82415	0.0974119	0.432011	Tas2r135	6	42405434	42406526	+	1093	protein_coding	taste receptor, type 2, member 135 [Source:MGI Symbol;Acc:MGI:2681302] && sp|Q7TQA9|TR135_MOUSE Taste receptor type 2 member 135 OS=Mus musculus OX=10090 GN=Tas2r135 PE=2 SV=2 && PF05296:Taste receptor protein (TAS2R)	-
ENSMUSG00000092841	0	3.02109	1.04314	3.38481	3.66928	5.51594	1.35474	4.19001	-1.6059	0.0975097	0.432258	Gm24330	10	121618468	121618543	-	76	miRNA	predicted gene, 24330 [Source:MGI Symbol;Acc:MGI:5454107] && - && -	-
novel.96	2.12983	1.00703	0	2.53861	1.83464	6.61913	1.04562	3.66413	-1.7965	0.0975504	0.432258	-	17	87205521	87206490	-	875	-	- && - && -	-
ENSMUSG00000066809	15.9737	11.0773	9.38829	16.0779	16.5118	25.3733	12.1464	19.321	-0.662713	0.0977168	0.43274	Gm10180	9	25101404	25101481	-	78	processed_pseudogene	predicted gene 10180 [Source:MGI Symbol;Acc:MGI:3701608] && - && -	-
ENSMUSG00000052212	5.32458	3.02109	5.21572	5.92342	4.5866	18.7542	4.52046	9.75474	-1.09366	0.0977519	0.43274	Cd177	7	24743983	24760311	-	2840	protein_coding	CD177 antigen [Source:MGI Symbol;Acc:MGI:1916141] && sp|Q8R2S8|CD177_MOUSE CD177 antigen OS=Mus musculus OX=10090 GN=Cd177 PE=2 SV=1 && PF00021:u-PAR/Ly-6 domain	-
ENSMUSG00000036249	284.332	357.496	370.316	280.939	280.7	286.829	337.381	282.823	0.254887	0.0977838	0.43274	Rbm43	2	51924448	51935163	-	2633	protein_coding	RNA binding motif protein 43 [Source:MGI Symbol;Acc:MGI:1918934] && sp|Q99J64|RBM43_MOUSE RNA-binding protein 43 OS=Mus musculus OX=10090 GN=Rbm43 PE=2 SV=1 && -	-
ENSMUSG00000096330	5.32458	2.01406	0	0	0	1.10319	2.44621	0.367729	2.84408	0.0979554	1	Gm21976	13	98279887	98307154	+	1359	protein_coding	predicted gene 21976 [Source:MGI Symbol;Acc:MGI:5439445] && - && PF00057:Low-density lipoprotein receptor domain class A	-
ENSMUSG00000085205	0	3.02109	4.17257	0.846203	0	0	2.39789	0.282068	2.81917	0.0981399	1	Gm13185	2	3752986	3755177	-	944	antisense	predicted gene 13185 [Source:MGI Symbol;Acc:MGI:3651411] && - && -	-
ENSMUSG00000082791	19.1685	18.1265	12.5177	22.8475	15.5944	41.9212	16.6042	26.7877	-0.680609	0.0981912	0.434359	Gm4875	6	117997207	117997992	+	786	processed_pseudogene	predicted gene 4875 [Source:MGI Symbol;Acc:MGI:3648108] && sp|Q5R5W0|LASP1_PONAB LIM and SH3 domain protein 1 OS=Pongo abelii OX=9601 GN=LASP1 PE=2 SV=1 && PF00412:LIM domain|PF14604:Variant SH3 domain|PF00880:Nebulin repeat	-
novel.193	43.6615	41.2882	39.6394	24.5399	40.3621	24.2701	41.5297	29.724	0.47965	0.0982404	1	-	6	4441281	4443002	+	1722	-	- && - && -	-
ENSMUSG00000028557	2069.13	1924.43	2183.3	1807.49	1807.12	1827.98	2058.95	1814.2	0.182572	0.0982523	0.434444	Rnf11	4	109451098	109484728	-	4263	protein_coding	ring finger protein 11 [Source:MGI Symbol;Acc:MGI:1352759] && sp|Q9QYK7|RNF11_MOUSE RING finger protein 11 OS=Mus musculus OX=10090 GN=Rnf11 PE=1 SV=1 && -	-
ENSMUSG00000015957	2.12983	8.05624	6.25886	1.69241	3.66928	1.10319	5.48164	2.15496	1.33531	0.0983342	1	Wnt11	7	98835112	98855195	+	4137	protein_coding	wingless-type MMTV integration site family, member 11 [Source:MGI Symbol;Acc:MGI:101948] && sp|P48615|WNT11_MOUSE Protein Wnt-11 OS=Mus musculus OX=10090 GN=Wnt11 PE=2 SV=1 && PF00110:wnt family	-
ENSMUSG00000029602	212.983	176.23	207.586	214.089	221.992	305.583	198.933	247.221	-0.311647	0.0983354	0.434488	Rasal1	5	120648812	120679597	+	3539	protein_coding	RAS protein activator like 1 (GAP1 like) [Source:MGI Symbol;Acc:MGI:1330842] && sp|Q9Z268|RASL1_MOUSE RasGAP-activating-like protein 1 OS=Mus musculus OX=10090 GN=Rasal1 PE=1 SV=2 && PF00168:C2 domain|PF00779:BTK motif|PF00616:GTPase-activator protein for Ras-like GTPase|PF00169:PH domain	-
ENSMUSG00000038352	52.1809	86.6045	139.781	92.2361	80.7242	289.035	92.8555	153.999	-0.72745	0.0983691	0.434488	Arl5c	11	97989578	97996181	-	2073	protein_coding	ADP-ribosylation factor-like 5C [Source:MGI Symbol;Acc:MGI:3028577] && sp|Q6P068|ARL5C_MOUSE ADP-ribosylation factor-like protein 5C OS=Mus musculus OX=10090 GN=Arl5c PE=2 SV=1 && -	-
ENSMUSG00000037613	539.912	540.775	511.14	414.639	477.924	479.887	530.609	457.483	0.214656	0.0983872	0.434488	Tnfrsf23	7	143665809	143685872	-	3962	protein_coding	tumor necrosis factor receptor superfamily, member 23 [Source:MGI Symbol;Acc:MGI:1930269] && sp|Q9ER63|TNR23_MOUSE Tumor necrosis factor receptor superfamily member 23 OS=Mus musculus OX=10090 GN=Tnfrsf23 PE=2 SV=2 && -	-
ENSMUSG00000112669	1.06492	2.01406	1.04314	2.53861	3.66928	5.51594	1.37404	3.90794	-1.4879	0.0985109	0.434636	Gm48689	10	94781974	94787161	-	450	antisense	predicted gene, 48689 [Source:MGI Symbol;Acc:MGI:6098317] && - && -	-
ENSMUSG00000025889	2.12983	1.00703	0	5.07722	8.25588	0	1.04562	4.44437	-2.10308	0.0985515	0.434636	Snca	6	60731575	60829855	-	2703	protein_coding	synuclein, alpha [Source:MGI Symbol;Acc:MGI:1277151] && - && PF01387:Synuclein	-
ENSMUSG00000102305	8.51932	6.04218	9.38829	11.0006	14.6771	14.3414	7.98326	13.3397	-0.738818	0.0985644	0.434636	Gm38192	9	73024293	73026139	+	1847	TEC	predicted gene, 38192 [Source:MGI Symbol;Acc:MGI:5611420] && - && -	-
ENSMUSG00000105742	28.7527	15.1054	46.9414	15.2316	11.9252	27.5797	30.2665	18.2455	0.739014	0.0985875	0.434636	Gm42748	5	122165597	122167937	+	2341	TEC	predicted gene 42748 [Source:MGI Symbol;Acc:MGI:5662885] && - && -	-
ENSMUSG00000018042	1714.51	1755.25	1699.28	2081.66	1918.12	1861.08	1723.02	1953.62	-0.1814	0.0986494	0.434725	Cyb5r3	15	83153494	83172592	-	4298	protein_coding	cytochrome b5 reductase 3 [Source:MGI Symbol;Acc:MGI:94893] && sp|Q9DCN2|NB5R3_MOUSE NADH-cytochrome b5 reductase 3 OS=Mus musculus OX=10090 GN=Cyb5r3 PE=1 SV=3 && -	-
ENSMUSG00000117244	1.06492	1.00703	1.04314	4.23101	4.5866	1.10319	1.03836	3.30693	-1.69017	0.0987516	0.43489	AC126254.3	17	53196451	53198567	+	1603	processed_pseudogene	3-phosphoglycerate dehydrogenase (Phgdh) pseudogene && sp|Q61753|SERA_MOUSE D-3-phosphoglycerate dehydrogenase OS=Mus musculus OX=10090 GN=Phgdh PE=1 SV=3 && -	-
ENSMUSG00000102912	9.58424	6.04218	5.21572	12.693	11.0078	12.1351	6.94738	11.9453	-0.784758	0.0987704	0.43489	Gm20731	4	108622929	108625216	-	2288	TEC	predicted gene, 20731 [Source:MGI Symbol;Acc:MGI:5313040] && sp|Q8BRN9|C2D1B_MOUSE Coiled-coil and C2 domain-containing protein 1B OS=Mus musculus OX=10090 GN=Cc2d1b PE=1 SV=1 && -	-
ENSMUSG00000098785	4.25966	3.02109	9.38829	0	3.66928	2.20638	5.55635	1.95855	1.52186	0.0988432	0.435027	Mir6395	8	34166622	34166712	-	91	miRNA	microRNA 6395 [Source:MGI Symbol;Acc:MGI:5530943] && - && -	-
ENSMUSG00000109428	1.06492	5.03515	3.12943	4.23101	4.5866	13.2383	3.0765	7.35196	-1.2325	0.0988543	1	Gm45698	7	81590894	81592028	+	1135	TEC	predicted gene 45698 [Source:MGI Symbol;Acc:MGI:5804813] && sp|Q571B6|WHAMM_MOUSE WASP homolog-associated protein with actin, membranes and microtubules OS=Mus musculus OX=10090 GN=Whamm PE=1 SV=2 && -	-
ENSMUSG00000111875	120.335	83.5835	91.7966	74.4658	77.0549	81.6359	98.5718	77.7189	0.343306	0.0990248	0.435347	Gm5425	10	84308886	84309344	+	459	processed_pseudogene	predicted gene 5425 [Source:MGI Symbol;Acc:MGI:3643901] && sp|Q01768|NDKB_MOUSE Nucleoside diphosphate kinase B OS=Mus musculus OX=10090 GN=Nme2 PE=1 SV=1 && -	-
ENSMUSG00000054203	30.8825	29.2039	58.416	20.3089	23.8503	35.302	39.5008	26.4871	0.584247	0.0990258	0.435347	Ifi205	1	174011998	174031810	-	4177	protein_coding	interferon activated gene 205 [Source:MGI Symbol;Acc:MGI:101847] && sp|Q8CGE8|IFI5A_MOUSE Interferon-activable protein 205-A OS=Mus musculus OX=10090 GN=Ifi205a PE=2 SV=1 && PF02758:PAAD/DAPIN/Pyrin domain	-
ENSMUSG00000057132	29.8176	31.2179	38.5963	42.3101	35.7755	60.6754	33.2106	46.2537	-0.471785	0.0990948	0.435347	Rpgrip1	14	52110704	52163546	+	12152	protein_coding	retinitis pigmentosa GTPase regulator interacting protein 1 [Source:MGI Symbol;Acc:MGI:1932134] && sp|Q9EPQ2|RPGR1_MOUSE X-linked retinitis pigmentosa GTPase regulator-interacting protein 1 OS=Mus musculus OX=10090 GN=Rpgrip1 PE=1 SV=1 && -	-
ENSMUSG00000050359	31.9475	37.2601	65.718	40.6177	29.3543	18.7542	44.9752	29.5754	0.596535	0.0991044	1	Sprr1a	3	92483952	92485895	-	806	protein_coding	small proline-rich protein 1A [Source:MGI Symbol;Acc:MGI:106660] && - && PF02389:Cornifin (SPRR) family	-
ENSMUSG00000112596	1.06492	4.02812	6.25886	1.69241	0.91732	1.10319	3.78396	1.23764	1.60274	0.0991311	0.435347	Gm48804	10	121829018	121832058	-	3041	TEC	predicted gene, 48804 [Source:MGI Symbol;Acc:MGI:6098514] && sp|Q7Z6B7|SRGP1_HUMAN SLIT-ROBO Rho GTPase-activating protein 1 OS=Homo sapiens OX=9606 GN=SRGAP1 PE=1 SV=1 && -	-
ENSMUSG00000099913	4.25966	5.03515	6.25886	1.69241	1.83464	3.30956	5.18456	2.27887	1.21135	0.0991555	1	Gm28551	1	53325507	53352667	-	3142	protein_coding	predicted gene 28551 [Source:MGI Symbol;Acc:MGI:5579257] && sp|Q8BFS9|ASND1_MOUSE Asparagine synthetase domain-containing protein 1 OS=Mus musculus OX=10090 GN=Asnsd1 PE=2 SV=1 && -	-
ENSMUSG00000050022	489.861	454.17	369.273	479.797	507.278	594.618	437.768	527.231	-0.267543	0.0991745	0.435347	Amz1	5	140724127	140761439	+	6697	protein_coding	archaelysin family metallopeptidase 1 [Source:MGI Symbol;Acc:MGI:2442258] && sp|Q8BVF9|AMZ1_MOUSE Archaemetzincin-1 OS=Mus musculus OX=10090 GN=Amz1 PE=2 SV=1 && -	-
ENSMUSG00000035835	100.102	94.6608	55.2866	127.777	98.1533	105.906	83.3498	110.612	-0.409216	0.09922	1	Plppr3	10	79860475	79874634	-	4357	protein_coding	phospholipid phosphatase related 3 [Source:MGI Symbol;Acc:MGI:2388640] && sp|Q7TPB0|PLPR3_MOUSE Phospholipid phosphatase-related protein type 3 OS=Mus musculus OX=10090 GN=Plppr3 PE=1 SV=1 && -	-
ENSMUSG00000040061	394.019	427.988	529.917	451.026	420.133	1038.1	450.641	636.42	-0.497158	0.0992388	1	Plcb2	2	118707517	118728438	-	6597	protein_coding	phospholipase C, beta 2 [Source:MGI Symbol;Acc:MGI:107465] && sp|A3KGF7|PLCB2_MOUSE 1-phosphatidylinositol 4,5-bisphosphate phosphodiesterase beta-2 OS=Mus musculus OX=10090 GN=Plcb2 PE=1 SV=1 && -	-
ENSMUSG00000083588	1.06492	1.00703	0	3.38481	3.66928	1.10319	0.690648	2.71909	-1.99093	0.0992695	0.435347	Gm8051	8	31214886	31215351	-	466	processed_pseudogene	predicted gene 8051 [Source:MGI Symbol;Acc:MGI:3647834] && sp|P63283|UBC9_CHICK SUMO-conjugating enzyme UBC9 OS=Gallus gallus OX=9031 GN=UBE2I PE=1 SV=1 && -	-
ENSMUSG00000033773	380.175	330.306	324.418	297.863	299.046	286.829	344.966	294.58	0.227247	0.0992727	0.435347	Rpap2	5	107597373	107661838	+	4136	protein_coding	RNA polymerase II associated protein 2 [Source:MGI Symbol;Acc:MGI:2141142] && sp|Q8VC34|RPAP2_MOUSE Putative RNA polymerase II subunit B1 CTD phosphatase Rpap2 OS=Mus musculus OX=10090 GN=Rpap2 PE=2 SV=2 && PF04181:Rtr1/RPAP2 family	-
ENSMUSG00000106692	5.32458	2.01406	0	0.846203	0	0	2.44621	0.282068	2.84412	0.0992732	1	Gm36447	5	150822859	150866601	+	1978	lincRNA	predicted gene, 36447 [Source:MGI Symbol;Acc:MGI:5595606] && - && -	-
ENSMUSG00000033368	27.6878	21.1476	35.4669	22.0013	21.0984	13.2383	28.1008	18.7793	0.570842	0.0993445	0.435347	Trim69	2	122160700	122179027	+	1888	protein_coding	tripartite motif-containing 69 [Source:MGI Symbol;Acc:MGI:1918178] && sp|Q80X56|TRI69_MOUSE E3 ubiquitin-protein ligase TRIM69 OS=Mus musculus OX=10090 GN=Trim69 PE=1 SV=1 && -	-
ENSMUSG00000081855	201.269	197.378	523.658	181.087	201.81	250.424	307.435	211.107	0.542925	0.0993652	0.435347	Rpl17-ps5	5	22612628	22613182	-	555	processed_pseudogene	ribosomal protein L17, pseudogene 5 [Source:MGI Symbol;Acc:MGI:3704246] && sp|Q3T025|RL17_BOVIN 60S ribosomal protein L17 OS=Bos taurus OX=9913 GN=RPL17 PE=2 SV=3 && PF00237:Ribosomal protein L22p/L17e	-
ENSMUSG00000116838	7.45441	13.0914	15.6471	22.0013	14.6771	20.9606	12.0643	19.213	-0.668809	0.0994581	1	AC165953.1	17	3312250	3314185	-	1936	processed_pseudogene	CD2-associated protein (Cd2ap) pseudogene && sp|Q9JLQ0|CD2AP_MOUSE CD2-associated protein OS=Mus musculus OX=10090 GN=Cd2ap PE=1 SV=3 && PF00018:SH3 domain|PF14604:Variant SH3 domain	-
ENSMUSG00000110711	0	1.00703	0	4.23101	0.91732	1.10319	0.335677	2.08384	-2.50142	0.0995115	0.435347	Gm45760	8	95870814	95872595	+	1782	TEC	predicted gene 45760 [Source:MGI Symbol;Acc:MGI:5804875] && sp|P05202|AATM_MOUSE Aspartate aminotransferase, mitochondrial OS=Mus musculus OX=10090 GN=Got2 PE=1 SV=1 && -	-
ENSMUSG00000106237	57.5054	74.5202	39.6394	88.0051	95.4013	55.1594	57.2217	79.5219	-0.477446	0.0995224	0.435347	Gm8066	5	137510253	137517501	+	485	lincRNA	predicted gene 8066 [Source:MGI Symbol;Acc:MGI:3646351] && - && -	-
ENSMUSG00000000884	127.79	142.998	115.789	106.622	110.996	98.1838	128.859	105.267	0.290723	0.0995546	1	Gnb1l	16	18498713	18566679	+	4219	protein_coding	guanine nucleotide binding protein (G protein), beta polypeptide 1-like [Source:MGI Symbol;Acc:MGI:1338057] && sp|Q9EQ15|GNB1L_MOUSE Guanine nucleotide-binding protein subunit beta-like protein 1 OS=Mus musculus OX=10090 GN=Gnb1l PE=2 SV=2 && -	-
ENSMUSG00000003271	28.7527	30.2109	29.208	27.9247	15.5944	16.5478	29.3905	20.0223	0.544726	0.0995666	0.435347	Sult2b1	7	45729983	45784669	-	3950	protein_coding	sulfotransferase family, cytosolic, 2B, member 1 [Source:MGI Symbol;Acc:MGI:1926342] && sp|O35400|ST2B1_MOUSE Sulfotransferase 2B1 OS=Mus musculus OX=10090 GN=Sult2b1 PE=1 SV=2 && PF00685:Sulfotransferase domain	-
ENSMUSG00000116656	23.4281	38.2671	32.3374	28.7709	21.0984	9.92869	31.3442	19.9327	0.640459	0.0996078	0.435347	AC131339.2	16	90341595	90349642	-	1932	processed_transcript	novel transcript && sp|P31789|ENV_IPMAE Envelope glycoprotein OS=Mouse intracisternal a-particle MIAE OX=11932 GN=env PE=2 SV=1 && -	-
ENSMUSG00000014686	85.1932	60.4218	90.7535	80.3893	85.3108	167.685	78.7895	111.128	-0.49257	0.0997176	0.435347	Ceacam16	7	19852097	19861299	-	1635	protein_coding	carcinoembryonic antigen-related cell adhesion molecule 16 [Source:MGI Symbol;Acc:MGI:2685615] && sp|E9QA28|CEA16_MOUSE Carcinoembryonic antigen-related cell adhesion molecule 16 OS=Mus musculus OX=10090 GN=Ceacam16 PE=1 SV=1 && PF13895:Immunoglobulin domain|PF13927:Immunoglobulin domain	-
ENSMUSG00000051316	92.6476	53.3726	119.961	66.85	68.799	56.2626	88.6606	63.9705	0.468449	0.0997802	0.435347	Taf7	18	37640491	37644204	-	3302	protein_coding	TATA-box binding protein associated factor 7 [Source:MGI Symbol;Acc:MGI:1346348] && sp|Q9R1C0|TAF7_MOUSE Transcription initiation factor TFIID subunit 7 OS=Mus musculus OX=10090 GN=Taf7 PE=1 SV=1 && PF04658:TAFII55 protein conserved region	-
ENSMUSG00000027977	17.0386	12.0844	8.34515	11.8468	4.5866	2.20638	12.4894	6.21327	0.980128	0.0998118	0.435347	Ndst3	3	123526166	123690853	-	9878	protein_coding	N-deacetylase/N-sulfotransferase (heparan glucosaminyl) 3 [Source:MGI Symbol;Acc:MGI:1932544] && sp|Q9EQH7|NDST3_MOUSE Bifunctional heparan sulfate N-deacetylase/N-sulfotransferase 3 OS=Mus musculus OX=10090 GN=Ndst3 PE=2 SV=2 && PF00685:Sulfotransferase domain|PF12062:heparan sulfate-N-deacetylase	-
ENSMUSG00000085154	29.8176	32.2249	38.5963	36.3867	46.7833	54.0562	33.5463	45.7421	-0.441871	0.0998136	0.435347	C130046K22Rik	11	103697724	103722832	+	780	processed_transcript	RIKEN cDNA C130046K22 gene [Source:MGI Symbol;Acc:MGI:3026935] && - && -	-
ENSMUSG00000032374	349.292	329.299	480.889	352.866	329.318	218.431	386.493	300.205	0.36294	0.0998303	0.435347	Plod2	9	92542223	92608428	+	5392	protein_coding	procollagen lysine, 2-oxoglutarate 5-dioxygenase 2 [Source:MGI Symbol;Acc:MGI:1347007] && sp|Q9R0B9|PLOD2_MOUSE Procollagen-lysine,2-oxoglutarate 5-dioxygenase 2 OS=Mus musculus OX=10090 GN=Plod2 PE=1 SV=2 && -	-
ENSMUSG00000096940	4.25966	2.01406	7.302	1.69241	2.75196	0	4.52524	1.48146	1.56892	0.0998319	0.435347	Gm4755	12	8764901	8771181	-	2647	bidirectional_promoter_lncRNA	predicted gene 4755 [Source:MGI Symbol;Acc:MGI:3779434] && - && -	-
ENSMUSG00000056851	5754.8	5937.45	6747.05	5442.78	5265.42	5461.89	6146.43	5390.03	0.189466	0.099845	0.435347	Pcbp2	15	102470539	102500061	+	5203	protein_coding	poly(rC) binding protein 2 [Source:MGI Symbol;Acc:MGI:108202] && sp|Q61990|PCBP2_MOUSE Poly(rC)-binding protein 2 OS=Mus musculus OX=10090 GN=Pcbp2 PE=1 SV=1 && PF00013:KH domain	-
ENSMUSG00000109610	6.38949	13.0914	15.6471	16.0779	22.933	17.651	11.7093	18.8873	-0.687641	0.0999885	0.435347	Gm7432	8	61380509	61381387	-	879	processed_pseudogene	predicted gene 7432 [Source:MGI Symbol;Acc:MGI:3645713] && sp|P25444|RS2_MOUSE 40S ribosomal protein S2 OS=Mus musculus OX=10090 GN=Rps2 PE=1 SV=3 && -	-
[truncated: 23,686 more rows]
