# Supplementary material for: CDCP1 knockdown suppresses PDGFRβ/AKT pathway-mediated vascular smooth muscle cell proliferation by inhibiting PDGFRβ endocytosis
Source: PeerJ. 2025 Apr 15;13:e19114. doi: 10.7717/peerj.19114 (PMC12007496; doi:10.7717/peerj.19114)
Supplement: Data S2 — The raw data shows all DEGs between siCDCP1 and siNC. [file peerj-13-19114-s003.xlsx]

## Sheet: Fig1
Table1. Lumen Area, Intimal Area and Medial Area of Vessels for Figure.1						Table.2 CDCP1 fluorescence intensity of vessels for Figure.1						Table.3 Gray value of proteins for Figure.2A
Area(µm2) Time (days)	0	7	14			Group	Sham	Ligation				Gray value Group	VSMC	EC	Fibro	Mac
lumen arrea (µm2)	39267	19683	7980			Mean fluorescence	5.937	22.964				CDCP1	126967	87071.8	69884.7	70835.7
	33985	17639	10264				3.782	19.032					193226	124741	105397	86977.4
	27678	18917	8837				10.373	17.642					167025	78376.2	70677.5	69286.2
Intimal area (µm2)	9846	18846	25993									β-actin	108021	112676	115988	128452
	13834	17549	24104										139639	140736	140834	135935
	10968	17484	28738										129739	119936	128534	115793
medial area (µm2)	10084	15934	19746
	11775	14668	17638
	11658	15705	18034
Intimal/medial	0.976398	1.18275	1.31637
	1.17486	1.19641	1.36659
	0.940813	1.11328	1.59355
Table.4 Gray value of proteins for Figure.2C						Table.5 Cell viability (%) in indicated group for Figure.2D								Table.6 EDU positive cell rate for Figure.2F
Gray value Group	CON	PDGF-BB				PDGF-BB Group	Control siRNA			CDCP1 siRNA				Group	Control siRNA	CDCP1 siRNA
CDCP1	8382.2	56770.2				-	99	113	106	100	118	110		EDU positive cell rate (%)	21.6	4.6
	7797.07	59742.9				+	501	598	564	411	387	380			22	4.2
	7973.83	58024.2													20.8	3.9
β-actin	74241.4	67656.7
	67159.6	74796.8
	71247.3	74206.4
Table.7 The wound healing area (%) in indicated group for Figure.2H								Table.8 Gray value of proteins in indicated group for Figure.2J
Time (h) Group	Control siRNA			CDCP1 siRNA				PDGF-BB Group		Control siRNA			CDCP1 siRNA
12	23	22	22	64	63	63		-	PCNA	442705	314123	508812	57691.8	468889	503908
24	82	81	80	84	83	82			β-actin	750347	698052	770927	73027.6	732640	690284
								+	PCNA	884587	1.04545e+06	1.16059e+06	77215.9	724066	835749
									β-actin	691083	701642	753632	70196.3	770283	720473
Table.9 Gray value of proteins in indicated group for Figure.3D										Table.10 Gray value of proteins in indicated group for Figure.4A
Protein Group	Control siRNA				CDCP1 siRNA					Protein Group			Control siRNA		CDCP1 siRNA
	0	5	15	30	0	5	15	30				IgG	-	+	-	+
b-actin	702593	748462	660348	690363	773846	783048	730348	773647		Input	b-actin		698835	679348	703843	729347
	750384	690348	737483	726475	692649	680264	707262	660273					730347	763724	734692	720347
	753027	77348.3	769346	730848	798347	802734	738463	718348					703472	727482	739457	745532
CDCP1	512893	539641	626010	720049	355969	303822	223486	201148			PDGFRβ		1.06922e+06	991848	1.14023e+06	1.13049e+06
	647582	546755	660048	548489	250046	306799	172572	103663					1.08091e+06	1.16086e+06	1.18285e+06	1.11654e+06
	801973	70773.7	800889	684074	419132	434279	333047	219096					1.05521e+06	1.08395e+06	1.12397e+06	1.17048e+06
PDGFRβ	520586	430634	517710	889981	296166	196573	79337.7	76235.2			NEDD4		838602	801630	858688	911684
	695503	473490	629685	634602	190285	208317	59537.3	39806.5					869113	939380	881631	929248
	853300	63767.1	754438	754534	411169	321801	128556	86323.8					914514	858429	879954	931915
P-PDGFRβ	44249.8	92155.6	196730	911340	30505.1	27520.2	23880.6	43682.7			CDCP1		719800	733696	140769	175043
	79287.3	133051	289655	851635	23595.4	45413	27387.2	31526.8					744954	794273	242448	223308
	77650.3	16005.5	317618	867714	30837.7	47304.7	41266.5	30731.3					710507	763856	207048	260936
AKT	41771.8	82940.1	176073	830231	28705.3	25814	22352.3	38484.5		Co-IP	NEDD4	1937	254096	618057	409594	1.27545e+06
	69376.4	113891	253159	711115	19938.1	36103.4	24675.8	26829.3				1634	246828	821018	265371	1.47658e+06
	87278.9	15957.5	330323	888539	27877.2	40729.4	35241.6	28918.1				1083	372207	553687	286865	1.41837e+06
P-AKT	10192.3	43377.7	122899	933179	5195.66	9473.73	12629	25669.2			PDGFRβ	1093	1.10905e+06	1.10258e+06	1.16134e+06	1.15237e+06
	8394.54	55465.1	151136	718227	1674.8	11228.1	12263.9	15802.5				973	1.16856e+06	1.19905e+06	1.19755e+06	1.13815e+06
	22605.2	9271.32	257652	1.09646e+06	5380.31	15925.2	21285.9	21891				826	1.09038e+06	1.16397e+06	1.16095e+06	1.20776e+06
Table.11 Protein fluorescence intensity in VSMCs for Figure.4C										Table.14 Gray value of proteins in indicated group for Figure.5E
Protein Group	Control siRNA	CDCP1 siRNA								Protein Group			Control siRNA		CDCP1 siRNA
NEDD4	25.843	28.482										IgG	-	+	-	+
	23.573	25.274								Input	b-actin		708348	694735	737469	729472
	26.746	28.743											690347	737347	663946	730347
Confocal	7.778	17.203											740347	73345.3	685361	697344
	7.001	14.128									PDGFRβ		1.08377e+06	1.01431e+06	1.1947e+06	1.13068e+06
	8.157	16.153											1.02171e+06	1.12077e+06	1.06895e+06	1.13204e+06
													1.11052e+06	109285	1.04175e+06	1.09483e+06
											Clathrin		850018	819787	899712	911840
													821513	906937	796736	942148
Table.12 Protein fluorescence intensity in VSMCs for Figure.5A													962451	86547.5	815580	871680
Protein Group	Control siRNA	CDCP1 siRNA									Rab5		814601	819787	884962	897251
Clathrin	30.375	32.745											828417	921684	836572	891023
	32.746	33.172											895820	87281	849848	857734
	31.462	34.347									CDCP1		1.11629e+06	1.09546e+06	238940	271364
Confocal	16.645	10.642											1.04215e+06	1.1656e+06	352755	350932
	19.68	10.482											1.12163e+06	114749	291690	383191
	17.901	10.235								Co-IP	Clathrin	2397	425859	836183	439959	667467
												2674	378718	878822	433424	725454
												2936	468714	85422.4	433073	570079
											Rab5	1093	1.04432e+06	717314	392038	261100
Table.13 Protein fluorescence intensity in VSMCs for Figure.5A												987	955993	796335	421632	268198
Protein Group	Control siRNA	CDCP1 siRNA										936	1.08394e+06	71657.7	422375	226442
Rab5	24.845	26.473									PDGFRβ	237	1.12415e+06	1.12755e+06	1.21682e+06	1.15257e+06
	26.463	28.452										384	1.10456e+06	1.15764e+06	1.08223e+06	1.15395e+06
	23.734	23.472										387	1.14754e+06	117353	1.07602e+06	1.1297e+06
Confocal	7.975	4.076
	7.859	3.954
	7.238	3.802
